# Supplementary material for: Transcriptomic and Metabolomic Investigation on Leaf Necrosis Induced by ZmWus2 Transient Overexpression in Nicotiana benthamiana
Source: Int J Mol Sci. 2023 Jul 7;24(13):11190. doi: 10.3390/ijms241311190 (PMC10342293; doi:10.3390/ijms241311190)
Supplement: Supplementary file 1 [file ijms-24-11190-s001.zip › ijms-2476729-supplementary-Table.xlsx]

## Sheet: Table S1
Table S1.The transcriptomics matrix for detected samples.
gene	GO	KEGG	Interpro	Swissprot	Description	BP	CC	MF	Pathway	EV24_1.read.count	EV24_2.read.count	EV24_3.read.count	WUS48_1.read.count	WUS48_2.read.count	WUS48_3.read.count	EV48_1.read.count	EV48_2.read.count	EV48_3.read.count	WUS48_1.read.count	WUS48_2.read.count	WUS48_3.read.count	EV66_1.read.count	EV66_2.read.count	EV66_3.read.count	WUS66_1.read.count	WUS66_2.read.count	WUS66_3.read.count
Niben101Scf00005g00003	GO:0003700;GO:0006355;GO:0008270;GO:0043565;	-	IPR013088;	sp|Q8LC79|GAT18_ARATH	GATA transcription factor 18	GO:0006355//regulation of transcription, DNA-templated;	-	GO:0003700//DNA-binding transcription factor activity;GO:0008270//zinc ion binding;GO:0043565//sequence-specific DNA binding;	-	0	1.03926	0	6.62799	0	1.03926	0	2	7	0	1	0	1.02279	0	0	0	3.18881	0
Niben101Scf00005g01008	-	K14544	IPR005554;	sp|Q6NRY2|NOL6_XENLA	Nucleolar protein 6	-	-	-	ko03008(Ribosome biogenesis in eukaryotes)	606	575	732.082	427	560.551	530.829	526.708	368.723	432	426.237	566.082	618	250.461	249.69	261.806	446.881	411.547	410.435
Niben101Scf00005g01010	-	-	-	sp|Q3MHH6|PYRD2_BOVIN	Pyridine nucleotide-disulfide oxidoreductase domain-containing protein 2	-	-	-	-	44.2468	42	25.5104	10.1747	20	48.8452	45.6523	58.5472	47.8059	22.8637	17.9621	18	60	54.6156	60	16.2009	10.2279	13.2863
Niben101Scf00005g01013	GO:0005083;GO:0006886;GO:0016192;	K20183	IPR000547;IPR001180;IPR019452;IPR019453;	sp|Q96JC1|VPS39_HUMAN	Vam6/Vps39-like protein	GO:0006886//intracellular protein transport;GO:0016192//vesicle-mediated transport;	-	-	-	1029.55	770.091	616.281	326.911	464	720	942.41	928	1062.78	195.353	224.918	207.538	867	951.327	1019.32	483	365.819	368.945
Niben101Scf00006g00003	-	K15113	-	AT1G07020.1	unknown protein; Has 39 Blast hits to 39 proteins in 17 species: Archae - 0; Bacteria - 0; Metazoa - 6; Fungi - 3; Plants - 28; Viruses - 0; Other Eukaryotes - 2 (source: NCBI BLink). LENGTH=147	-	-	-	-	49	92.8851	61.3676	63.5845	65.3167	77	70.1537	62.898	51	28.06	31.6771	38.6633	37.4133	31.1778	43.1091	46	29	26.7268
Niben101Scf00006g02004	-	-	-	ref|XP_002511479.1|	conserved hypothetical protein [Ricinus communis] gb|EEF52081.1| conserved hypothetical protein [Ricinus communis]	-	-	-	-	7.39977	10	5.1963	0.93168	5.52333	9.35333	1.03926	11.6754	10	1	1.16203	1	1.08006	4.09117	10.4392	1.05349	4	5.31468
Niben101Scf00006g02010	GO:0003677;GO:0003682;	-	IPR009057;	AT1G70000.1	myb-like transcription factor family protein LENGTH=261	-	-	GO:0003677//DNA binding;GO:0003682//chromatin binding;	-	1093.89	1198	721	1173.65	1176	1507.76	951.197	1459.6	1591.83	407	556.978	534.633	2106	2162.7	2061.81	775.475	764.895	637.066
Niben101Scf00006g02011	GO:0004672;GO:0004674;GO:0005524;GO:0006468;GO:0016772;	K04688	IPR000961;IPR011009;	sp|P34102|PK3_DICDI	Protein kinase 3	GO:0006468//protein phosphorylation;	-	GO:0004672//protein kinase activity;GO:0004674//protein serine/threonine kinase activity;GO:0005524//ATP binding;GO:0016772//transferase activity, transferring phosphorus-containing groups;	-	799.077	1087.21	678	1332.92	1424.45	1143	1577.6	1632.3	1225.07	559.121	748.267	680.765	579	610	888.956	505	439.584	377.41
Niben101Scf00010g01004	-	K03966	IPR019377;	sp|Q03015|NDUS6_NEUCR	NADH-ubiquinone oxidoreductase 12 kDa subunit, mitochondrial	-	-	-	ko00190(Oxidative phosphorylation)	717.393	735.707	705.657	614.202	643.044	875	827	1024.91	966	1085.46	1138.37	890.183	775.372	635	684.53	1121.99	1029	984.178
Niben101Scf00010g01005	-	-	-	emb|CDY43227.1|	BnaC05g48200D [Brassica napus]	-	-	-	-	149.902	235	90.725	141.145	107.24	141.168	57	110.545	94.347	48	53.0022	23.292	51.9193	63.3948	59.2378	36.8224	23	31
Niben101Scf00010g01006	-	-	-	emb|CDY04185.1|	BnaA09g19630D [Brassica napus]	-	-	-	-	77.5943	55.4982	35	74.8267	57.7641	85.0592	27.0207	78.9837	112.263	47	38	46.4814	88	86.4048	111.484	45.5531	52.6747	44
Niben101Scf00010g03002	GO:0003735;GO:0005622;GO:0005840;GO:0006412;	-	IPR008195;IPR012870;	gb|KEH27032.1|	DUF1666 family protein [Medicago truncatula]	GO:0006412//translation;	GO:0005622//intracellular anatomical structure;GO:0005840//ribosome;	GO:0003735//structural constituent of ribosome;	-	50.9237	27.8413	22	14	23.2407	22	62.6435	41.9345	34.1648	22.1234	14	28.6992	23.1243	50	54.0415	20.497	29.826	16.6281
Niben101Scf00010g05013	-	-	IPR025742;IPR026896;	AT1G73840.1	hydroxyproline-rich glycoprotein family protein LENGTH=388	-	-	-	-	442.869	448.888	299.192	310	543.16	357.039	447	503.001	477.02	376.691	399.076	558.082	522.698	535	476	506.647	407	429.864
Niben101Scf00010g05014	-	-	IPR011598;	sp|Q05B92|TFE3_BOVIN	Transcription factor E3	-	-	-	-	0	0	0	1.03926	0	0	0	0	0	1	2.16012	3.06838	0	0	2	2.12587	2.77491	8
Niben101Scf00010g05015	GO:0003924;GO:0005525;GO:0008270;	K14416	IPR000795;IPR001876;IPR027417;	sp|Q04634|EF1A_TETPY	Elongation factor 1-alpha	-	-	GO:0003924//GTPase activity;GO:0005525//GTP binding;GO:0008270//zinc ion binding;	ko03015(mRNA surveillance pathway)	0	0	0	0	0	0	0	0	1.06294	0	0	0	0	0	0	0	0	0
Niben101Scf00010g05016	-	K14416	IPR009000;IPR009001;	sp|A7I656|EF1A_METB6	Elongation factor 1-alpha	-	-	-	ko03015(mRNA surveillance pathway)	0	0	0.924971	0	0	0.93168	0	0	0	0	0	0	0	1	0	0	0	0
Niben101Scf00011g00004	-	-	IPR006569;	AT3G63070.1	Tudor/PWWP/MBT domain-containing protein LENGTH=1347	-	-	-	-	997.689	954.04	723.874	792	1015	1093.47	1203	1071.42	1062.68	815.21	1017.68	944	925.816	825.999	914	1086.03	879.506	1067.11
Niben101Scf00011g00012	-	-	-	emb|CDX97291.1|	BnaA02g20820D [Brassica napus]	-	-	-	-	73.4441	61.3676	77.8198	114.831	89	130.741	108.222	77	73.7874	142.547	209.886	213.048	75.8659	51.1921	59	247	259.134	224
Niben101Scf00011g00020	GO:0004602;GO:0006979;GO:0055114;	-	IPR000889;IPR012336;IPR029759;IPR029760;	sp|O23970|GPX1_HELAN	Glutathione peroxidase 1	GO:0006979//response to oxidative stress;GO:0055114//obsolete oxidation-reduction process;	-	GO:0004602//glutathione peroxidase activity;	-	106	107.044	73.6027	72.9079	68.5911	114.319	132.022	119	151	205.68	305	209.532	178.989	167.028	211.752	233	205.146	149.845
Niben101Scf00012g00010	GO:0004672;GO:0005524;GO:0006468;GO:0016772;	-	IPR011009;IPR013320;	sp|Q9FN94|RLK7_ARATH	Receptor-like protein kinase	GO:0006468//protein phosphorylation;	-	GO:0004672//protein kinase activity;GO:0005524//ATP binding;GO:0016772//transferase activity, transferring phosphorus-containing groups;	-	429	683	296.319	593	840.286	667.884	223.969	702.681	232	302.936	236.793	418	90.4156	63.3542	98.3152	283.718	273.325	183.214
Niben101Scf00012g00011	-	-	-	sp|O24340|FPF1_SINAL	Flowering-promoting factor 1	-	-	-	-	0	0	0	0	0	0	0	0	0	0	0.898107	0	0	0	0	0	0	0
Niben101Scf00012g00012	GO:0004672;GO:0004674;GO:0005524;GO:0006468;GO:0016772;	-	IPR011009;	sp|Q9FN94|RLK7_ARATH	Receptor-like protein kinase	GO:0006468//protein phosphorylation;	-	GO:0004672//protein kinase activity;GO:0004674//protein serine/threonine kinase activity;GO:0005524//ATP binding;GO:0016772//transferase activity, transferring phosphorus-containing groups;	-	2283.34	2506.69	879.213	1745.02	2556	2584	1518.78	1984	1533.68	3169.63	2625	2905.54	1120	1022.54	1098.87	2904	2725.98	2520.19
Niben101Scf00013g01005	GO:0003677;GO:0008289;	K09338	IPR002913;IPR009057;IPR013978;IPR023393;	sp|Q8LC03|ATB13_ARATH	Homeobox-leucine zipper protein ATHB-13	-	-	GO:0003677//DNA binding;GO:0008289//lipid binding;	-	38	36.722	21.4786	18.0314	28.4444	55	24.4475	28.6741	62	22.8637	19.5653	35.3493	65.4733	77.9444	56.5807	19	11	22.0787
Niben101Scf00013g03001	GO:0004222;GO:0005524;GO:0006508;	-	IPR000642;IPR003959;IPR027417;	sp|B9L3S8|FTSH2_THERP	ATP-dependent zinc metalloprotease FtsH 2	GO:0006508//proteolysis;	-	GO:0004222//metalloendopeptidase activity;GO:0005524//ATP binding;	-	446.761	487	349.191	202.175	330.295	411.547	430.253	367.326	450	271	420.657	358	367.22	457.188	449.837	400.328	356	404.978
Niben101Scf00013g03009	-	-	-	-	Unknown protein	-	-	-	-	0	0	0	0	0	0	0	0	0	0	1.06294	0.924971	0	0	0	1.10467	2.07852	0
Niben101Scf00013g03014	-	-	-	-	Unknown protein	-	-	-	-	9.49023	5.26747	13	10.6294	5.54982	18	11.4319	10.2485	13.256	3.11778	18.7067	9.87918	13	7	11.6203	9	5.4003	3.06838
Niben101Scf00015g00001	GO:0004672;GO:0004713;GO:0005524;GO:0006468;GO:0016772;	-	IPR011009;	sp|Q9LIG2|RLK6_ARATH	Receptor-like protein kinase	GO:0006468//protein phosphorylation;	-	GO:0004672//protein kinase activity;GO:0004713//protein tyrosine kinase activity;GO:0005524//ATP binding;GO:0016772//transferase activity, transferring phosphorus-containing groups;	-	7.45344	0	0	0	0	0	3	2.32407	1	0	0	0	0	1	0	0	0	0
Niben101Scf00015g00005	-	-	-	-	Unknown protein	-	-	-	-	1.16203	2	0	1.02279	0.949023	2.10699	1	1.06294	0	1	0	1.86336	0	1.03926	1.03926	2.69432	3	0
Niben101Scf00015g00009	-	K12603	IPR005135;	sp|Q4P9T3|CCR4_USTMA	Glucose-repressible alcohol dehydrogenase transcriptional effector	-	-	-	ko03018(RNA degradation)	1173.48	1099.79	1188	986.257	1007.15	1283.62	1494.45	1373.9	1182.81	497	632	577.531	980	934.252	1044.27	728.849	746.928	634
Niben101Scf00015g01003	GO:0003735;GO:0005622;GO:0005840;GO:0006412;	K02889	IPR001147;	sp|Q9FDZ9|RL212_ARATH	60S ribosomal protein L21-2	GO:0006412//translation;	GO:0005622//intracellular anatomical structure;GO:0005840//ribosome;	GO:0003735//structural constituent of ribosome;	ko03010(Ribosome)	478.059	528.087	602	597	619.364	512	712.839	523.67	537.147	832.261	1132	1284.03	450.461	393	449.999	1018.33	1061.58	1159.81
Niben101Scf00015g04023	-	-	-	emb|CDY22546.1|	BnaC03g23560D [Brassica napus]	-	-	-	-	244.447	186.008	214.913	155	192.391	231.243	258	242.147	264.597	173.432	189.145	159.007	185.908	167	172	217.3	162	158.769
Niben101Scf00015g04024	-	-	-	emb|CDX79898.1|	BnaA05g02580D [Brassica napus]	-	-	-	-	530.022	418.324	461.75	464.549	648.498	573.89	561	519	719.299	381	409.343	536.966	593.139	632.097	645	555.915	444.911	490
Niben101Scf00016g00006	GO:0004672;GO:0004674;GO:0005515;GO:0005524;GO:0006468;GO:0016772;	-	IPR001611;IPR003591;IPR011009;IPR013210;	sp|P47735|RLK5_ARATH	Receptor-like protein kinase 5	GO:0006468//protein phosphorylation;	-	GO:0004672//protein kinase activity;GO:0004674//protein serine/threonine kinase activity;GO:0005515//protein binding;GO:0005524//ATP binding;GO:0016772//transferase activity, transferring phosphorus-containing groups;	-	2071	1545.51	1377	547.59	696.522	1349.51	2033.24	1540	2809.34	1010.07	1265	1435.22	2553.73	4248.54	4349.3	2083.71	1349.85	1793
Niben101Scf00016g00007	-	-	IPR011107;	sp|O14218|YPI1_SCHPO	Type 1 phosphatases regulator ypi1	-	-	-	-	117	97.79	92.4971	105	140.3	133.23	100.525	97.6904	86.2585	81.7277	76	102	62.7499	52	65.8836	139.1	101.545	131.687
Niben101Scf00016g01007	-	K09580	IPR012336;	sp|Q8VX13|PDI13_ARATH	Protein disulfide isomerase-like 1-3	-	-	-	ko04141(Protein processing in endoplasmic reticulum)	213.048	231.755	189.501	174	238	282.374	289	253.814	253.653	635.845	1025.05	643	172.195	143.37	187	570.553	432.299	511.46
Niben101Scf00016g01009	-	-	-	gb|KEH31187.1|	F-box/RNI superfamily protein [Medicago truncatula]	-	-	-	-	22.6813	29.661	19.9295	70.5841	117	77.5943	63.823	31	17.6674	1397.52	2467.82	1688.8	50.9237	43.1091	46	1010	1024.91	1045
Niben101Scf00016g01010	GO:0005515;GO:0008270;	K15692	IPR003137;IPR013083;	sp|G3X9R7|RN148_MOUSE	RING finger protein 148	-	-	GO:0005515//protein binding;GO:0008270//zinc ion binding;	-	483	478.059	368.945	197.735	306.581	368.937	679.867	831	745	42.9953	57	54.003	288.427	243.899	324.476	99	64.839	49.9484
Niben101Scf00016g02001	-	-	-	emb|CDX72851.1|	BnaC06g32990D [Brassica napus]	-	-	-	-	2	1	0	0	2.16012	2.04559	1.89805	0	3	0	0	0	0	0.93168	2.20933	0	0	0
Niben101Scf00016g03004	-	-	-	sp|Q6GQV7|EDRF1_MOUSE	Erythroid differentiation-related factor 1	-	-	-	-	187.522	203	216.839	233.093	210	227.598	300.933	303.783	218.244	136.143	117.652	156	204	199.87	230	171.729	161.601	128.118
Niben101Scf00016g04005	-	-	IPR015500;	sp|O65351|SUBL_ARATH	Subtilisin-like protease	-	-	-	-	28.7213	20.7852	34.2956	28.7394	61	44	66.236	51	36.722	200.467	183.161	170.666	35	58.4614	52.7233	357	437.528	359.628
Niben101Scf00016g04006	GO:0004672;GO:0004674;GO:0005509;GO:0005524;GO:0006468;GO:0016772;	K13412	IPR011009;IPR011992;	AT1G35670.1	calcium-dependent protein kinase 2 LENGTH=495	GO:0006468//protein phosphorylation;	-	GO:0004672//protein kinase activity;GO:0004674//protein serine/threonine kinase activity;GO:0005509//calcium ion binding;GO:0005524//ATP binding;GO:0016772//transferase activity, transferring phosphorus-containing groups;	ko04626(Plant-pathogen interaction)	65	63.7235	83.869	15.1844	34.7653	33	230.657	160.02	195	18.7067	34.4722	33.14	110.161	128.868	121.244	198	255	185.926
Niben101Scf00016g04007	GO:0003723;GO:0003735;GO:0005622;GO:0005840;GO:0006412;	K02888	IPR028909;	sp|Q6G508|RL21_BARHE	50S ribosomal protein L21	GO:0006412//translation;	GO:0005622//intracellular anatomical structure;GO:0005840//ribosome;	GO:0003723//RNA binding;GO:0003735//structural constituent of ribosome;	ko03010(Ribosome)	876.872	1477	571.593	503.107	1237.22	1513.16	647.458	796.621	1054	416	535.698	411	1195.63	1270.31	1284.98	257.053	194	207.272
Niben101Scf00016g04008	-	-	-	sp|Q5ZIL6|TM41B_CHICK	Transmembrane protein 41B	-	-	-	-	432.887	564	386	439.249	577	540.03	458.211	426.111	357.135	410	208.335	217.368	189	179.792	244.1	446.285	383.487	327.367
Niben101Scf00017g00002	GO:0005524;GO:0016818;	K12598	IPR012961;IPR025696;	sp|Q9CZU3|SK2L2_MOUSE	Superkiller viralicidic activity 2-like 2	-	-	GO:0005524//ATP binding;GO:0016818//hydrolase activity, acting on acid anhydrides, in phosphorus-containing anhydrides;	ko03018(RNA degradation)	8.5412	6.32097	2	4.25174	5.54982	20	3.11778	7.45344	8.83732	38.4526	44.6881	51.1921	5	5	11.6203	24	24.8414	20.4559
Niben101Scf00017g00004	-	-	IPR002885;	sp|Q9M2A1|PP263_ARATH	Pentatricopeptide repeat-containing protein	-	-	-	-	29.8138	26.512	28.06	34.2956	24.2489	36	42	54.6156	47	10.8006	23.5242	20.8785	24.2304	40	55.2726	24.0492	14	18.7067
Niben101Scf00017g00005	GO:0004175;GO:0004298;GO:0005839;GO:0051603;	K02738	IPR001353;IPR029055;	sp|A1RWY6|PSB1_THEPD	Proteasome subunit beta 1	GO:0051603//proteolysis involved in cellular protein catabolic process;	GO:0005839//proteasome core complex;	GO:0004175//endopeptidase activity;GO:0004298//threonine-type endopeptidase activity;	ko03050(Proteasome)	1038.86	660	885.649	1280.54	968.952	1127.24	883	1098.01	853.748	2786	3385.91	3511.5	829.603	646.419	751.384	2600.92	2491	2590
Niben101Scf00017g00006	GO:0005506;GO:0016705;GO:0020037;GO:0055114;	K00487	IPR001128;	AT2G30490.1	cinnamate-4-hydroxylase LENGTH=505	GO:0055114//obsolete oxidation-reduction process;	-	GO:0005506//iron ion binding;GO:0016705//oxidoreductase activity, acting on paired donors, with incorporation or reduction of molecular oxygen;GO:0020037//heme binding;	ko00945(Stilbenoid, diarylheptanoid and gingerol biosynthesis);ko00941(Flavonoid biosynthesis);ko00940(Phenylpropanoid biosynthesis);ko00130(Ubiquinone and other terpenoid-quinone biosynthesis)	1.06294	0	0	2.07852	0	0	0	0	0	1	4	0	0	0	1.02279	0	1.05349	2
Niben101Scf00017g00021	-	-	IPR001296;	sp|D1BZ82|MSHA_XYLCX	D-inositol 3-phosphate glycosyltransferase	-	-	-	-	0	0	0	1	1.16203	0	0	0	0	11.5884	7	8.50348	3.69988	1	1.03926	6.52176	16.57	9.35333
Niben101Scf00017g00026	GO:0004672;GO:0004674;GO:0005524;GO:0006468;GO:0006950;GO:0016772;	-	IPR011009;IPR013320;IPR014729;	sp|Q9FN94|RLK7_ARATH	Receptor-like protein kinase	GO:0006468//protein phosphorylation;GO:0006950//response to stress;	-	GO:0004672//protein kinase activity;GO:0004674//protein serine/threonine kinase activity;GO:0005524//ATP binding;GO:0016772//transferase activity, transferring phosphorus-containing groups;	-	0	1.89805	0	1	0	0.924971	1	1.03926	0.93168	3.314	1.03926	3.11778	0.898107	0	0	1.16203	1	3.24018
Niben101Scf00017g01009	GO:0004672;GO:0005515;GO:0005524;GO:0006468;GO:0016772;	-	IPR001611;IPR011009;	AT3G17840.1	receptor-like kinase 902 LENGTH=647	GO:0006468//protein phosphorylation;	-	GO:0004672//protein kinase activity;GO:0005515//protein binding;GO:0005524//ATP binding;GO:0016772//transferase activity, transferring phosphorus-containing groups;	-	0	0	0	42.6096	25.9815	16.1659	0	0	0	731	1284.19	782.436	12.3373	12.6419	11	470.88	362.589	421
Niben101Scf00017g02004	-	K01853	IPR008930;	sp|Q9SXV6|CAS1_GLYGL	Cycloartenol synthase	-	-	-	ko00100(Steroid biosynthesis)	6	10.4583	0	0	1.02279	2.84707	1.05349	4	0	0.924971	2	0	6.52176	4.41866	3.11778	2.07852	7.18485	1
Niben101Scf00017g03003	-	-	IPR004159;IPR029063;	AT5G64030.1	S-adenosyl-L-methionine-dependent methyltransferases superfamily protein LENGTH=829	-	-	-	-	3308	3026.18	2056.21	3330	4424.13	2571.44	3080.91	2350.8	3031.52	10224.9	16581	13180	3642.98	3854	3891.46	10964.3	7661.46	9276.02
Niben101Scf00017g04008	-	-	IPR009091;	AT5G08710.1	Regulator of chromosome condensation (RCC1) family protein LENGTH=434	-	-	-	-	14.5496	8.31407	8.98107	11	4	16.2685	13	7.56042	15.3419	18.0314	16.8559	14	45.7062	32.374	45	19.7459	13.9752	22.0933
Niben101Scf00017g04010	-	-	-	gb|ABF94077.1|	expressed protein [Oryza sativa Japonica Group]	-	-	-	-	1.08006	0	0	0	0	0	0	2	0	0	0	0	0	0	0	1	1.16203	1
Niben101Scf00017g04017	GO:0003824;GO:0008152;GO:0008840;GO:0009089;GO:0016829;	K01714	IPR002220;IPR013785;	sp|Q48LD5|DAPA_PSE14	4-hydroxy-tetrahydrodipicolinate synthase	GO:0008152//metabolic process;GO:0009089//lysine biosynthetic process via diaminopimelate;	-	GO:0003824//catalytic activity;GO:0008840//4-hydroxy-tetrahydrodipicolinate synthase activity;GO:0016829//lyase activity;	ko00300(Lysine biosynthesis);ko00261(Monobactam biosynthesis)	730	621.477	490.064	835.127	903.116	869.86	593.649	601	624	1086.5	1483	1493.72	746.639	592.19	655.274	898	879.047	881.497
Niben101Scf00017g04019	-	-	IPR009091;	AT5G08710.1	Regulator of chromosome condensation (RCC1) family protein LENGTH=434	-	-	-	-	44	29	41.8332	19	31.3217	43.9801	48.4002	65.3167	29	71.2166	44.3986	98	96.6511	97.8264	148.025	65.4733	51.963	48.4978
Niben101Scf00018g01002	-	-	IPR001810;IPR015915;	AT1G76920.1	F-box family protein LENGTH=374	-	-	-	-	84.2796	70	73.3425	148.92	217	141.339	95.963	118.199	115.358	126.79	106.875	141	81	83.6665	110	120.967	100.234	89.2081
Niben101Scf00018g02003	GO:0003824;GO:0016831;GO:0019752;GO:0030170;	K01590	IPR002129;IPR015424;	AT1G43710.1	Pyridoxal phosphate (PLP)-dependent transferases superfamily protein LENGTH=482	GO:0019752//carboxylic acid metabolic process;	-	GO:0003824//catalytic activity;GO:0016831//carboxy-lyase activity;GO:0030170//pyridoxal phosphate binding;	ko00340(Histidine metabolism)	2399.33	2190.76	1070.44	1056.17	1248	2236	3018.97	2741	4887.27	841.758	781.046	705.841	2604	2437.31	2209.76	1599	1383.25	1360.25
Niben101Scf00018g02004	GO:0004497;GO:0005506;GO:0016705;GO:0020037;GO:0055114;	-	IPR001128;	sp|P48416|CP10_LYMST	Cytochrome P450 10	GO:0055114//obsolete oxidation-reduction process;	-	GO:0004497//monooxygenase activity;GO:0005506//iron ion binding;GO:0016705//oxidoreductase activity, acting on paired donors, with incorporation or reduction of molecular oxygen;GO:0020037//heme binding;	-	0	0	0	3.79609	0	0	2.12587	0.924971	1	0	0.93168	2.20933	0	0	0	1	0	2.32407
Niben101Scf00021g00004	GO:0006810;GO:0016021;	K20352	IPR015720;	sp|P49755|TMEDA_HUMAN	Transmembrane emp24 domain-containing protein 10	GO:0006810//transport;	GO:0016021//integral component of membrane;	-	-	264.542	198	273.325	277.641	322.562	393.879	329.445	368.224	454	320	285.861	322	316.458	235.242	265.726	756.409	603	549.537
Niben101Scf00021g00005	-	K02911	-	AT1G26740.1	Ribosomal L32p protein family LENGTH=134	-	-	-	ko03010(Ribosome)	12.5735	17	12	11.6203	16	31.3217	14.3191	44.6041	30.5513	14	6.37761	19.4244	28	21.8244	28.8821	13.256	6.23556	4.15704
Niben101Scf00021g00006	-	-	IPR006702;	sp|Q5NRN4|CASP2_SOLDE	Casparian strip membrane protein 2	-	-	-	-	0	0	0	3.18881	0	0	0	0	0	0	0	0	0	0	0	0	0	1.02279
Niben101Scf00021g00010	-	-	IPR012891;	AT1G14060.1	GCK domain-containing protein LENGTH=179	-	-	-	-	51.2424	86.1639	54.0415	88.337	114.958	90	29	34.861	42	25.9214	60.3448	74.0238	5.26747	24	15.944	33.2989	42	27.0207
Niben101Scf00021g00012	-	K18443	-	sp|Q42510|GNOM_ARATH	ARF guanine-nucleotide exchange factor GNOM	-	-	-	ko04144(Endocytosis)	0	5	1.08006	0	0.949023	0	3	1.06294	8.32474	0	0	0.93168	3.314	5.1963	5.1963	0	0	1
Niben101Scf00021g01007	GO:0003677;GO:0003682;	-	IPR009057;	sp|Q9SAK5|APL_ARATH	Myb family transcription factor APL	-	-	GO:0003677//DNA binding;GO:0003682//chromatin binding;	-	9.56642	4.62485	4	5.1963	3.72672	8.83732	10.3926	8.31407	8.98107	0	0	4.64814	2	3.24018	3.06838	2.84707	0	0
Niben101Scf00021g01016	-	-	IPR006456;IPR009057;	sp|Q9SEZ1|ZHD11_ARATH	Zinc-finger homeodomain protein 11	-	-	-	-	4.15704	6.28675	9	13	26.7268	21	3.24018	2.04559	2.84707	44.2468	20	103.105	6.4748	2	4.15704	101.553	75.1172	87.2978
Niben101Scf00022g00003	-	-	IPR000477;IPR024937;	gb|AFI44321.1|	maturase (mitochondrion) [Silene vulgaris]	-	-	-	-	0	0	0	0	0	0	0	0	0	0	1.03926	0	0	0	0	0	1	1.08006
Niben101Scf00022g00008	GO:0003676;GO:0005515;GO:0005634;GO:0008270;	K10624	IPR001878;IPR013083;IPR014891;	sp|Q02084|A33_PLEWA	Zinc-binding protein A33	-	GO:0005634//nucleus;	GO:0003676//nucleic acid binding;GO:0005515//protein binding;GO:0008270//zinc ion binding;	-	131.986	102.485	142.502	118.476	143.418	113.161	197	102	76.6943	160	322.938	196.376	78.7689	97.975	107	267.86	205.344	236
Niben101Scf00022g00011	-	-	-	ref|XP_002516625.1|	conserved hypothetical protein [Ricinus communis] gb|EEF45749.1| conserved hypothetical protein [Ricinus communis]	-	-	-	-	0	0	0	0	0	0	0	0	1.06294	0	0	0	0	0	0	0	0	0
Niben101Scf00022g00013	GO:0009772;GO:0019684;GO:0045156;	K02706	IPR000484;	sp|A8SE98|PSBD_CERDE	Photosystem II D2 protein	GO:0009772//photosynthetic electron transport in photosystem II;GO:0019684//photosynthesis, light reaction;	-	GO:0045156//electron transporter, transferring electrons within the cyclic electron transport pathway of photosynthesis activity;	ko00195(Photosynthesis)	2	1.06294	0	3	0	1.86336	1.10467	2.07852	0	0	0	0	1.16203	0	0	0	0	1.05349
Niben101Scf00022g00014	GO:0015232;GO:0015886;GO:0016020;GO:0017004;GO:0020037;	-	IPR002541;IPR003557;	sp|P30962|CCMC_BRADU	Heme exporter protein C	GO:0015886//heme transport;GO:0017004//cytochrome complex assembly;	GO:0016020//membrane;	GO:0015232//heme transmembrane transporter activity;GO:0020037//heme binding;	-	0	0	0	0	0	0	0	0	0	0.949023	0	0	0	0	0	0	0	0
Niben101Scf00022g00015	-	-	-	ref|XP_002520077.1|	conserved hypothetical protein [Ricinus communis] gb|EEF42401.1| conserved hypothetical protein [Ricinus communis]	-	-	-	-	4.32024	6.13676	8.5412	1.05349	4	3.18881	1.84994	3	0	0	2.20933	0	2.07852	2.69432	5	2	4.64814	1
Niben101Scf00022g00016	GO:0005515;GO:0005779;GO:0007031;GO:0008270;GO:0016558;	K13346	IPR006845;IPR013083;IPR025654;	sp|Q5ZM74|RN141_CHICK	RING finger protein 141	GO:0007031//peroxisome organization;GO:0016558//protein import into peroxisome matrix;	GO:0005779//integral component of peroxisomal membrane;	GO:0005515//protein binding;GO:0008270//zinc ion binding;	ko04146(Peroxisome)	520	487.413	354.97	370.063	481.177	556.004	484.08	539	505	248.675	397	285.136	464.348	433.703	496.196	327	286.992	278.416
Niben101Scf00022g01003	-	-	IPR017877;	sp|Q39117|TGT2_ARATH	Trihelix transcription factor GT-2	-	-	-	-	29	12	13.9444	11	24.8414	28.6382	31.3177	28.4444	51	97.79	116.546	99	32.217	34.4722	59.6519	165.242	193.302	168.844
Niben101Scf00022g04003	GO:0003824;GO:0008762;GO:0009690;GO:0016491;GO:0016614;GO:0019139;GO:0050660;GO:0055114;	K00279	IPR016164;IPR016166;IPR016170;	sp|Q9FUJ1|CKX7_ARATH	Cytokinin dehydrogenase 7	GO:0009690//cytokinin metabolic process;GO:0055114//obsolete oxidation-reduction process;	-	GO:0003824//catalytic activity;GO:0008762//UDP-N-acetylmuramate dehydrogenase activity;GO:0016491//oxidoreductase activity;GO:0016614//oxidoreductase activity, acting on CH-OH group of donors;GO:0019139//cytokinin dehydrogenase activity;GO:0050660//flavin adenine dinucleotide binding;	ko00908(Zeatin biosynthesis)	63.2097	37	29.7622	145.22	95	121.593	29.8138	47.5006	41.5704	188.106	96.9955	168	145	223.111	193	388.822	417.299	333.107
Niben101Scf00022g06001	-	-	IPR001810;IPR006553;	sp|Q9SMY8|FBL15_ARATH	F-box/LRR-repeat protein 15	-	-	-	-	361.225	248.383	301.385	132.92	188	259	472.948	340	514.108	63.4131	115.781	79.0121	429	452.81	446.761	237	210.97	150.932
Niben101Scf00022g06009	-	-	-	gb|ABF94264.1|	expressed protein [Oryza sativa Japonica Group]	-	-	-	-	807	1057.38	661.747	510.574	656.327	1096	552.726	864.848	1019	189.145	150.932	173.432	833.486	775.287	761.595	150	149	176.629
Niben101Scf00022g09004	GO:0000166;GO:0046872;	K01533	IPR008250;	sp|Q5HL56|COPA_STAEQ	Copper-exporting P-type ATPase A	-	-	GO:0000166//nucleotide binding;GO:0046872//metal ion binding;	-	247.892	288	290.993	307.454	299.364	311.778	524.826	261.349	262	298	422.981	345	455.785	386.616	447.939	324.476	365	338.013
Niben101Scf00022g09008	-	K15082	IPR006553;	sp|Q58DG6|FXL20_BOVIN	F-box/LRR-repeat protein 20	-	-	-	-	245.183	304	299	582.179	694	478.466	355.932	297.044	257.053	1641	1826.12	1269.06	242	200.577	189.131	1662.52	1415.47	1403
Niben101Scf00022g09009	-	-	IPR002885;	sp|Q1PFH7|PPR89_ARATH	Pentatricopeptide repeat-containing protein	-	-	-	-	46.5021	38.9793	56	45.7062	45.3236	76	70.6696	80.1245	114.885	68.5911	75.8659	50.294	47	74	104.583	66	62.6435	50.1168
Niben101Scf00022g09011	GO:0016020;	K02221	IPR003425;	ref|WP_019475137.1|	membrane protein [Prochlorococcus sp. W2]	-	GO:0016020//membrane;	-	-	383.852	1007.45	178.753	133.025	360.141	533	174	400.902	547	25.9214	36.8205	40.808	626.829	500	573.985	11.0996	15	14.5496
Niben101Scf00022g09023	-	K01533	-	AT5G21930.1	P-type ATPase of Arabidopsis 2 LENGTH=883	-	-	-	-	74.3702	53	81.0045	67.5043	62.6355	66.3702	117	73.3425	70.2978	78	84.18	75.4661	133.664	76.9052	99.7689	90.7088	85	73
Niben101Scf00022g09026	-	-	-	ref|XP_002516141.1|	conserved hypothetical protein [Ricinus communis] gb|EEF46143.1| conserved hypothetical protein [Ricinus communis]	-	-	-	-	49.9579	33.2989	17	13.5104	29.8138	43.0819	35.3348	54.0415	57.4788	4	17	11.6203	37	39.9622	52.1624	9.49023	2.10699	9
Niben101Scf00022t00025	-	-	-	-	-	-	-	-	-	0	0	0	0	0	0	0	0	0	0	0	0	0.924971	0	0	0.93168	0	0
Niben101Scf00022t09007	-	K12188	-	-	-	-	-	-	ko04144(Endocytosis)	0	1.89805	0	4	5.31468	6.4748	0	1.03926	0	11.0467	6.23556	6.23556	1.79621	0	1	17.4305	5	4.32024
Niben101Scf00023g00004	GO:0005524;GO:0006810;GO:0016021;GO:0016887;GO:0042626;GO:0055085;	K05663	IPR003439;IPR011527;IPR027417;	sp|Q62IG3|MSBA_BURMA	Lipid A export ATP-binding/permease protein MsbA	GO:0006810//transport;GO:0055085//transmembrane transport;	GO:0016021//integral component of membrane;	GO:0005524//ATP binding;GO:0016887//ATP hydrolysis activity;GO:0042626//ATPase-coupled transmembrane transporter activity;	-	278.521	226.398	231.98	248.383	340.877	253.266	291	340	284.698	157	191.171	202.513	234.409	217.02	236	199.832	183.144	164
Niben101Scf00023g01002	-	-	-	-	Unknown protein	-	-	-	-	0	0	0	0	0	0	0	0	0	0	0	0	0	1.10467	0	0	0	0
Niben101Scf00023g02002	-	-	-	ref|NP_001055171.1|	product [Oryza sativa Japonica Group]	-	-	-	-	353	387.971	281.191	372	435.45	363.355	492.681	389.722	419.861	420.314	480	467	476.434	480	516.269	498.1	484.002	449.842
Niben101Scf00023g03015	GO:0006629;GO:0016788;	-	IPR013830;	sp|Q9FIA1|GDL87_ARATH	GDSL esterase/lipase	GO:0006629//lipid metabolic process;	-	GO:0016788//hydrolase activity, acting on ester bonds;	-	1055.89	564.318	674.478	1164	1241	1374.69	555	870.528	662.77	492.543	579.422	419	503.831	478.21	711	1155.66	915.841	716.928
Niben101Scf00023g03016	-	K18270	IPR026147;	sp|Q15042|RB3GP_HUMAN	Rab3 GTPase-activating protein catalytic subunit	-	-	-	-	432.024	417.299	401.437	888.096	704	592.055	458.786	496	523.787	303.728	367.853	266.05	451.039	369.122	415	439	436.925	316
Niben101Scf00023g05010	GO:0003824;GO:0004553;GO:0005975;	-	IPR001701;IPR008928;	sp|O48766|GUN11_ARATH	Endoglucanase 11	GO:0005975//carbohydrate metabolic process;	-	GO:0003824//catalytic activity;GO:0004553//hydrolase activity, hydrolyzing O-glycosyl compounds;	-	2	16.6281	1.86336	96.1059	138.221	39.4919	0.898107	5	3	1024.91	1813	1189.15	8.18234	18.9805	16.8559	183	243.412	177.594
Niben101Scf00023g06002	GO:0002143;GO:0003824;GO:0004792;GO:0005829;	K11996	IPR001763;IPR016040;IPR028885;	sp|A6ZT19|UBA4_YEAS7	Adenylyltransferase and sulfurtransferase UBA4	GO:0002143//tRNA wobble position uridine thiolation;	GO:0005829//cytosol;	GO:0003824//catalytic activity;GO:0004792//thiosulfate sulfurtransferase activity;	ko04122(Sulfur relay system)	273	234	227.759	203	264.615	289.45	282.809	328.69	295	179.636	151.695	343	257.736	220.808	283.899	168.36	178.753	135.614
Niben101Scf00023g06009	-	-	IPR008480;	ref|XP_007020738.1|	LIM and calponin domains-containing protein 1, putative [Theobroma cacao] gb|EOY12263.1| LIM and calponin domains-containing protein 1, putative [Theobroma cacao]	-	-	-	-	64.2632	67	56.3356	14.7995	33	88.337	48.4473	95.0012	120.554	6.23556	10.7773	14	41	66.236	88	4.32024	6.13676	12.3373
Niben101Scf00023g07007	-	K00700	IPR015902;	sp|Q6CCT1|GLGB_YARLI	1,4-alpha-glucan-branching enzyme	-	-	-	ko00500(Starch and sucrose metabolism)	470.587	518.59	270.207	595.445	654	639	227.759	322	401.782	196.376	164.181	287.604	404	454.936	391.263	175	195.381	136.957
Niben101Scf00023g08006	GO:0000105;GO:0000107;GO:0003824;GO:0005737;GO:0008152;GO:0016763;GO:0016833;	K01663	IPR006062;IPR010139;IPR014640;IPR029062;	sp|C5D7P0|HIS5_GEOSW	Imidazole glycerol phosphate synthase subunit HisH	GO:0000105//histidine biosynthetic process;GO:0008152//metabolic process;	GO:0005737//cytoplasm;	GO:0000107//imidazoleglycerol-phosphate synthase activity;GO:0003824//catalytic activity;GO:0016763//pentosyltransferase activity;GO:0016833//oxo-acid-lyase activity;	ko00340(Histidine metabolism)	518	527.069	507.305	541.892	619.455	579	789.761	548.508	638	524.826	717.393	722.451	468.706	429.214	410.435	431	370	500.837
Niben101Scf00023g08011	GO:0004672;GO:0004674;GO:0005524;GO:0006468;GO:0016772;	-	IPR011009;	AT5G55090.1	mitogen-activated protein kinase kinase kinase 15 LENGTH=448	GO:0006468//protein phosphorylation;	-	GO:0004672//protein kinase activity;GO:0004674//protein serine/threonine kinase activity;GO:0005524//ATP binding;GO:0016772//transferase activity, transferring phosphorus-containing groups;	-	136.896	152	162.124	597.207	406.517	301.385	171.478	91.6069	75	161	188.25	254	77.7643	75.6866	111.985	371.884	324	369.901
Niben101Scf00024g00003	-	K01934	IPR002698;IPR024185;	sp|Q8L539|5FCL_ARATH	5-formyltetrahydrofolate cyclo-ligase, mitochondrial	-	-	-	ko00670(One carbon pool by folate)	246.081	234	183	176.629	218	373.701	260.812	320.77	362.402	76	86.0977	86.0223	292	277.482	300.933	83.9545	76.9052	84.18
Niben101Scf00024g00006	GO:0003677;GO:0003682;	-	IPR009057;	AT1G70000.1	myb-like transcription factor family protein LENGTH=261	-	-	GO:0003677//DNA binding;GO:0003682//chromatin binding;	-	110.087	66.3702	56	35.0769	28.6741	78	94.5726	161.181	167.909	53.0022	51.963	78.1353	201	227	276.564	72	66.9637	63.4131
Niben101Scf00024g00008	GO:0030145;GO:0045735;	-	IPR001929;	sp|Q9LMC9|GLT2_ARATH	Germin-like protein subfamily T member 2	-	-	GO:0030145//manganese ion binding;GO:0045735//nutrient reservoir activity;	-	116.46	190.002	186.027	336.72	137.41	159	107	479.92	383	980.694	874.488	1041.08	291.818	255	359.272	591.981	567	679.676
Niben101Scf00024g00010	-	-	-	sp|Q3HXY0|NGFV1_HOPST	Venom nerve growth factor 1	-	-	-	-	0	0	0	0	0	0	0	0	0	5	6.23556	28.8821	0	0	0	0.898107	6	9
Niben101Scf00024g00011	-	-	IPR007656;	emb|CDX73116.1|	BnaC06g35640D [Brassica napus]	-	-	-	-	3.18881	3.69988	2	0	0	6.62799	1.03926	4.15704	1.79621	74	125	108.069	5	11.8807	5.11396	87.3101	104.296	89
Niben101Scf00024g00012	-	-	IPR011598;	sp|Q9R210|TFEB_MOUSE	Transcription factor EB	-	-	-	-	108.083	96.0974	57	333	500.837	431	150.128	77.7322	185.059	699.52	1847	890.74	173.895	239	207.852	418.324	413.145	414.664
Niben101Scf00024g01005	GO:0003824;GO:0005975;GO:0016901;GO:0048038;	-	IPR011042;	sp|P13650|DHGB_ACICA	Quinoprotein glucose dehydrogenase B	GO:0005975//carbohydrate metabolic process;	-	GO:0003824//catalytic activity;GO:0016901//oxidoreductase activity, acting on the CH-OH group of donors, quinone or similar compound as acceptor;GO:0048038//quinone binding;	-	84.8918	49.3492	53.7282	59	47.8321	91.5721	154	129.907	81.9878	180.06	229.676	213.048	91.6069	108	126	235.893	196	171.729
Niben101Scf00024g02014	GO:0003824;GO:0005975;GO:0016901;GO:0048038;	-	IPR011042;	sp|P13650|DHGB_ACICA	Quinoprotein glucose dehydrogenase B	GO:0005975//carbohydrate metabolic process;	-	GO:0003824//catalytic activity;GO:0016901//oxidoreductase activity, acting on the CH-OH group of donors, quinone or similar compound as acceptor;GO:0048038//quinone binding;	-	156.928	320.498	317.039	759.698	490.53	299.07	218	338	357.907	1112	1076.82	1365.43	257.185	263.374	367	1836.75	1393.93	1287
Niben101Scf00024g02018	GO:0006486;GO:0008378;GO:0016020;GO:0030246;	-	IPR002659;IPR013320;	sp|Q8L7F9|B3GTF_ARATH	Beta-1,3-galactosyltransferase 15	GO:0006486//protein glycosylation;	GO:0016020//membrane;	GO:0008378//galactosyltransferase activity;GO:0030246//carbohydrate binding;	-	38	22.0787	33	178.21	45.0029	50.2982	54.7817	28	30.8251	24.9742	15	22.8637	44.7206	58.5472	54.0415	20.7852	24.2489	24
Niben101Scf00024g02021	-	-	IPR004022;	gb|KEH31889.1|	aminoacyl-tRNA synthetase [Medicago truncatula]	-	-	-	-	439	448.559	485.61	418	404.272	318.634	603.147	446.881	442.724	102.384	150	151	400.902	327	383.421	226.037	167.028	160.131
Niben101Scf00024g02023	GO:0003677;GO:0003682;	K09422	IPR009057;	sp|P81393|MYB08_ANTMA	Myb-related protein 308	-	-	GO:0003677//DNA binding;GO:0003682//chromatin binding;	-	0	1.03926	0	0	0	0	2	1.08006	0	0	2.10699	2	1.06294	0.924971	1	0	0	0
Niben101Scf00024g02024	-	-	-	gb|EEQ88451.1|	conserved hypothetical protein [Ajellomyces dermatitidis ER-3]	-	-	-	-	1.08006	6.13676	1.89805	16.8559	10	14.8811	0.924971	0	4.15704	45.6523	35.3493	50.9237	5.1963	3.59243	6	39	52.2916	40
Niben101Scf00024g03002	-	K16276	-	AT1G74770.1	zinc ion binding LENGTH=1259	-	-	-	-	29	15.5889	10.2485	54.1286	31.1778	68.5911	6.28675	5	76	6.97221	9	9.72054	247.516	264.777	325.53	12	14.8811	7.39977
Niben101Scf00024g03006	GO:0006511;GO:0036459;	-	IPR006865;IPR028889;	AT3G47890.1	Ubiquitin carboxyl-terminal hydrolase-related protein LENGTH=1568	GO:0006511//ubiquitin-dependent protein catabolic process;	-	-	-	1248	1097	1345.64	1510	1841.5	1241.67	1776.57	1274.73	1255	2443.69	2936.78	3076	1168.13	924.226	1206.29	3096.99	2812.24	2543.44
Niben101Scf00024g03018	GO:0000166;GO:0003676;	K12741	IPR012677;	AT1G58470.1	RNA-binding protein 1 LENGTH=360	-	-	GO:0000166//nucleotide binding;GO:0003676//nucleic acid binding;	ko03040(Spliceosome)	12.6419	26	14.8811	9.24971	11	12.4711	13.0435	26.512	18.7067	34.2956	40.4148	28	23	23.2407	12	25.9214	29.661	20.8785
Niben101Scf00024g03019	-	-	IPR004883;	sp|Q9STS6|LBD27_ARATH	LOB domain-containing protein 27	-	-	-	-	1.10467	0	0	0	0	1	0	0	0	1.02279	0	4.21398	0	0	0.924971	2	10.3926	2.79504
Niben101Scf00024g04005	GO:0004672;GO:0004674;GO:0005509;GO:0005524;GO:0006468;GO:0016772;	K13412	IPR011009;IPR011992;	AT1G74740.1	calcium-dependent protein kinase 30 LENGTH=541	GO:0006468//protein phosphorylation;	-	GO:0004672//protein kinase activity;GO:0004674//protein serine/threonine kinase activity;GO:0005509//calcium ion binding;GO:0005524//ATP binding;GO:0016772//transferase activity, transferring phosphorus-containing groups;	ko04626(Plant-pathogen interaction)	2006	2672.07	2263.44	2077.41	2475.71	1489	1983.44	1586.32	1554	1159.81	1196.28	829.603	524.826	511.316	484.08	1256	1268	1205.03
Niben101Scf00024g04006	GO:0000166;GO:0016021;GO:0046872;	K01535	IPR001757;IPR004014;IPR023298;IPR023299;	sp|P83970|PMA1_WHEAT	Plasma membrane ATPase	-	GO:0016021//integral component of membrane;	GO:0000166//nucleotide binding;GO:0046872//metal ion binding;	ko00190(Oxidative phosphorylation)	125.796	121	61.3163	33.5405	37.5586	85.2193	167.321	126.633	149	26	65.0739	54	96.1253	122.735	96.8003	66.3702	57	48.895
Niben101Scf00024g04032	-	-	IPR002625;IPR002885;IPR011990;	sp|Q9M907|PP217_ARATH	Pentatricopeptide repeat-containing protein	-	-	-	-	356.548	669	334	704.193	705	771.163	459.234	382.456	310.781	363	458.125	316.34	225	166.281	224.535	314.83	230.716	222.401
Niben101Scf00025g00005	GO:0000166;GO:0003676;GO:0003723;GO:0005634;GO:0006396;GO:0030529;	K15191	IPR002344;IPR011991;IPR012677;	ref|XP_007026487.1|	RNA-binding protein, putative isoform 1 [Theobroma cacao] gb|EOY06989.1| RNA-binding protein, putative isoform 1 [Theobroma cacao]	GO:0006396//RNA processing;	GO:0005634//nucleus;	GO:0000166//nucleotide binding;GO:0003676//nucleic acid binding;GO:0003723//RNA binding;	-	2582.29	2591.6	2102	2193.9	2469.67	2614	3137.52	3336.35	4048.6	452.078	516.512	416.722	2931	2824	3139.82	1074	1027.14	925.627
Niben101Scf00025g00006	GO:0008963;GO:0016020;GO:0016021;	K01000	IPR000715;	sp|Q5WTI4|MRAY_LEGPL	Phospho-N-acetylmuramoyl-pentapeptide-transferase	-	GO:0016020//membrane;GO:0016021//integral component of membrane;	GO:0008963//phospho-N-acetylmuramoyl-pentapeptide-transferase activity;	-	109.938	89.4779	68.5911	29.0993	39.5167	101	75	139.444	172	17.281	21.4786	18.0314	46.3538	77	74.4055	24.0492	28	29.0993
Niben101Scf00028g00002	-	-	IPR007650;	emb|CDY65610.1|	BnaC05g51730D [Brassica napus]	-	-	-	-	134.796	77	59.4033	63.4131	60.7374	110.617	80	107.356	155.395	24	36.3741	109.007	184.479	217.205	258.776	69.1542	67	73
Niben101Scf00028g01004	GO:0006810;GO:0016021;	-	IPR004324;IPR020846;	sp|Q55721|FBT_SYNY3	Folate-biopterin transporter	GO:0006810//transport;	GO:0016021//integral component of membrane;	-	-	77.5943	63.823	41	14.5496	24.2237	33.14	48.8452	61.3163	60.1732	5	4	5.81017	73	104.766	92.0513	5.69414	11.5884	10
Niben101Scf00028g01007	GO:0006810;GO:0016021;	-	IPR004324;IPR020846;	sp|Q55721|FBT_SYNY3	Folate-biopterin transporter	GO:0006810//transport;	GO:0016021//integral component of membrane;	-	-	96.6511	96.0974	84	74	58.1017	91	123.127	141.145	99.6474	24.2304	12	37.2027	95.272	107	135.104	48.4473	28.7213	33.2563
Niben101Scf00028g03008	-	-	IPR012876;	AT3G22540.1	Protein of unknown function (DUF1677) LENGTH=110	-	-	-	-	3.06838	5.69414	1.05349	0	0	0.924971	1	4.15704	3.72672	0	0	1.03926	3.59243	3	3	0	0	0
Niben101Scf00028g03009	GO:0003735;GO:0005840;GO:0006412;	K02874	IPR000218;IPR023571;	sp|Q110B7|RL14_TRIEI	50S ribosomal protein L14	GO:0006412//translation;	GO:0005840//ribosome;	GO:0003735//structural constituent of ribosome;	ko03010(Ribosome)	15.5889	24.2237	14.3606	13.5104	11.4319	19.7584	6	10	4.64814	5	4.32024	8.18234	4.74511	6.32097	6	2.12587	0	3
Niben101Scf00028g04008	-	-	-	gb|KEH43864.1|	heat shock 22 kDa protein [Medicago truncatula]	-	-	-	-	1	6.97221	4	15.1208	15.3419	15.1844	8.42796	9	4.25174	95.272	100	157.967	14.9069	8.83732	10.3926	165.242	107.773	102
Niben101Scf00028g04010	-	-	-	gb|ABF98856.1|	expressed protein [Oryza sativa Japonica Group]	-	-	-	-	63	64.839	54.5733	54	74.8267	68.0126	78.4312	57.1593	65.4733	28.7394	57	76	62.7499	62	65.8836	51.1396	39.8589	49.5143
Niben101Scf00028g04011	-	-	-	emb|CDY47288.1|	BnaA10g03580D [Brassica napus]	-	-	-	-	20.7852	19.7459	10.7773	23	24	20.9166	48	43.2024	32.7294	15.1844	13.6954	16	35.0769	21.2743	32	20.7852	13.9752	19.884
Niben101Scf00028g04012	-	-	IPR006716;	sp|Q5PXE3|SGMR1_MUSER	Sigma non-opioid intracellular receptor 1	-	-	-	-	0	1.02279	0	0	0	1.06294	0	3	0	49.379	82.8499	59.2378	1.03926	3.59243	0	61	59.2638	69
Niben101Scf00031g00001	GO:0003824;GO:0008760;GO:0016765;GO:0019277;	-	IPR005750;IPR013792;	sp|A4VIE0|MURA_PSEU5	UDP-N-acetylglucosamine 1-carboxyvinyltransferase	GO:0019277//UDP-N-acetylgalactosamine biosynthetic process;	-	GO:0003824//catalytic activity;GO:0008760//UDP-N-acetylglucosamine 1-carboxyvinyltransferase activity;GO:0016765//transferase activity, transferring alkyl or aryl (other than methyl) groups;	-	44	32.217	16.7702	46.3959	39.4919	45.7274	16.1659	31	29	77.8563	88	88.5649	26.5926	29.4197	25.2839	134	116.923	127.646
Niben101Scf00031g00002	GO:0016757;	K03846	IPR005599;	sp|Q8VDI9|ALG9_MOUSE	Alpha-1,2-mannosyltransferase ALG9	-	-	GO:0016757//glycosyltransferase activity;	ko00513(Various types of N-glycan biosynthesis);ko00510(N-Glycan biosynthesis)	165	164	191.736	190	185.77	203.536	217.326	206.485	171	143.496	161.87	160	162.124	150	166.804	214.087	190.184	164.354
Niben101Scf00031g00003	GO:0003824;GO:0006099;GO:0008964;GO:0015977;	K01595	IPR021135;	AT3G14940.1	phosphoenolpyruvate carboxylase 3 LENGTH=968	GO:0006099//tricarboxylic acid cycle;GO:0015977//carbon fixation;	-	GO:0003824//catalytic activity;GO:0008964//phosphoenolpyruvate carboxylase activity;	ko00710(Carbon fixation in photosynthetic organisms);ko00620(Pyruvate metabolism)	111.67	46	46.7691	27.7491	27	69.6304	53.1057	80.6406	35.3348	18.7067	19.7584	61	61	68.56	69	82.0845	104.325	74.9728
Niben101Scf00031g01003	GO:0004497;GO:0005506;GO:0016705;GO:0020037;GO:0055114;	-	IPR001128;	AT2G26710.1	Cytochrome P450 superfamily protein LENGTH=520	GO:0055114//obsolete oxidation-reduction process;	-	GO:0004497//monooxygenase activity;GO:0005506//iron ion binding;GO:0016705//oxidoreductase activity, acting on paired donors, with incorporation or reduction of molecular oxygen;GO:0020037//heme binding;	-	153.548	89.3763	76.9052	46.7016	68	105	233.569	83	79.9244	18.4103	23.7256	26.3374	47	52.0838	68.4478	46	39.4919	30.7454
Niben101Scf00031g01005	-	-	IPR001480;	sp|Q9FLV4|Y5248_ARATH	G-type lectin S-receptor-like serine/threonine-protein kinase	-	-	-	-	3013	5939.25	1220.19	1184.38	3671.43	2611	369.901	2499.27	628	319.053	293.479	302.678	176.674	119.515	161.659	1019	1200	1221.3
Niben101Scf00031g02001	-	-	IPR001480;	sp|Q9FLV4|Y5248_ARATH	G-type lectin S-receptor-like serine/threonine-protein kinase	-	-	-	-	1698.25	6021	3130.25	5101.88	8276.15	3643.64	550.807	2090.79	1189	1314	1030.72	1355	245.174	287.405	268.573	1277.89	1124	1105.45
Niben101Scf00032g01006	-	-	IPR008974;	sp|Q84WU2|UBP13_ARATH	Ubiquitin carboxyl-terminal hydrolase 13	-	-	-	-	805.602	1046	924	904.063	839	925.611	1449.3	1192.92	1316.87	517	635.635	549.433	1142	1124.48	1163.67	1148.85	951.961	995.61
Niben101Scf00032g02001	GO:0003700;GO:0006355;GO:0043565;	-	IPR004827;	emb|CBM56257.1|	bZIP transcription factor [Nicotiana benthamiana]	GO:0006355//regulation of transcription, DNA-templated;	-	GO:0003700//DNA-binding transcription factor activity;GO:0043565//sequence-specific DNA binding;	-	0	1.05349	0	0	0	0	0	0	0	0	0	0	0	0	0	0	0	0
Niben101Scf00032g02010	-	-	-	-	Unknown protein	-	-	-	-	0	0	0	0	0	0	0	0	0	1.08006	7.15955	0	0	1	0	2.77491	2	2.07852
Niben101Scf00033g00002	-	-	IPR018108;IPR023395;	AT1G74240.1	Mitochondrial substrate carrier family protein LENGTH=364	-	-	-	-	110.393	64	70.2039	94.0969	73.0747	86.3866	55	79.7201	65.6729	152	134.064	124.845	46.3959	44.6881	62.3556	77.2372	78	67
Niben101Scf00033g00007	GO:0004672;GO:0005524;GO:0006468;GO:0016772;	-	IPR011009;	sp|Q9LHP4|RCH2_ARATH	Receptor-like protein kinase 2	GO:0006468//protein phosphorylation;	-	GO:0004672//protein kinase activity;GO:0005524//ATP binding;GO:0016772//transferase activity, transferring phosphorus-containing groups;	-	0	0	0	0	0	0	0	0	0	0	0	0	0	0	0	0	1.05349	0
Niben101Scf00033g01001	GO:0015986;GO:0045261;GO:0046933;GO:0046961;	K02136	IPR000131;IPR023632;IPR023633;	sp|Q07UZ4|ATPG_RHOP5	ATP synthase gamma chain	GO:0015986//ATP synthesis coupled proton transport;	GO:0045261//proton-transporting ATP synthase complex, catalytic core F(1);	GO:0046933//proton-transporting ATP synthase activity, rotational mechanism;GO:0046961//proton-transporting ATPase activity, rotational mechanism;	ko00190(Oxidative phosphorylation)	1974.59	1374.1	1507	1379	1885.98	1754	1926.83	1959.67	1896.15	999.766	1103	1313.79	1416.13	1393	1531.87	1089.13	1107.98	981.061
Niben101Scf00033g03002	-	-	IPR004883;	sp|Q9STS6|LBD27_ARATH	LOB domain-containing protein 27	-	-	-	-	0	0	0	1	0	0	0	0	0	0	0	0	0	0	0	0	1	0
Niben101Scf00033g04001	-	-	-	-	Unknown protein	-	-	-	-	0	0	0	0	0	0	0	0	0	1	0	0	0	0	0	0	0	0
Niben101Scf00033g05002	-	-	IPR012463;	sp|Q10Q07|NNJA1_ORYSJ	Ninja-family protein	-	-	-	-	0	0	0	0	0	0	0	0	0	0.924971	0	1.03926	0	1.10467	1.03926	0	0	0
Niben101Scf00033g07004	-	-	-	-	Unknown protein	-	-	-	-	180	176.447	191.469	173	241.108	228.262	292.736	209.93	273.325	199.38	208	362	203.356	171	223.572	251.607	219.224	226.501
Niben101Scf00033g07005	-	-	IPR019378;	ref|XP_007048355.1|	O-fuc isoform 1 [Theobroma cacao]	-	-	-	-	229.676	222.401	157.169	127	180	246.351	364	272.175	246.493	109.138	159.078	163	254.041	201.644	294	195.381	138.82	144.711
Niben101Scf00033g07007	-	-	IPR021775;	ref|NP_001045237.1|	product [Oryza sativa Japonica Group]	-	-	-	-	1.08006	1.02279	0.949023	0	0	1.06294	3.69988	5	5.1963	0	0	0	8.31407	6.28675	10	0	0	0
Niben101Scf00033g07013	-	-	-	gb|KEH21973.1|	WRKY transcription factor-like protein [Medicago truncatula]	-	-	-	-	1	2.07852	0	0	0	3.11778	0	0	0	4.64814	3	3.24018	1.02279	0.949023	8.42796	8	6.37761	2.77491
Niben101Scf00033g07014	GO:0005451;GO:0006812;GO:0006813;GO:0006814;GO:0015299;GO:0016021;GO:0055085;	-	IPR006153;IPR030153;	sp|Q9SIT5|CHX15_ARATH	Cation/H(+) antiporter 15	GO:0006812//cation transport;GO:0006813//potassium ion transport;GO:0006814//sodium ion transport;GO:0055085//transmembrane transport;	GO:0016021//integral component of membrane;	GO:0005451//monovalent cation:proton antiporter activity;GO:0015299//solute:proton antiporter activity;	-	27	26	25.5648	48	56.1631	42.9573	32.2668	26.3374	24	82.9089	48.0985	146	16.6281	5.59008	19.884	58.1985	61.3163	63.7656
Niben101Scf00033g07016	-	-	IPR011016;IPR013083;	AT5G08750.3	RING/FYVE/PHD zinc finger superfamily protein LENGTH=370	-	-	-	-	113.777	75	117.986	68.4478	97	134.064	152.795	132.56	140.3	115.358	182.316	115	92	137.12	89	245.174	157.51	183.161
Niben101Scf00034g00012	-	-	IPR029058;	AT2G23620.1	methyl esterase 1 LENGTH=263	-	-	-	-	164.595	34.2956	41.5704	13.4716	19	62	142.93	107	156.609	11.2507	10.4392	10.5349	38	22.3216	38.8488	26	18.7067	20.497
Niben101Scf00034g01011	-	-	IPR015300;	ref|XP_002522368.1|	DNA binding protein, putative [Ricinus communis] gb|EEF40052.1| DNA binding protein, putative [Ricinus communis]	-	-	-	-	20	19.4411	9.20513	25.6236	7.37446	9	25.5104	43.4736	10	12.4711	8.38512	11.0467	37.4133	30.1385	30.5356	12	22	17.4305
Niben101Scf00034g01012	-	-	IPR015300;	ref|XP_002519145.1|	DNA binding protein, putative [Ricinus communis] gb|EEF43356.1| DNA binding protein, putative [Ricinus communis]	-	-	-	-	61.0481	63	54.0415	5.59008	18.7793	45.7274	111.201	61.9694	100	5	17.4305	8	93.9652	94.0969	97.7493	16.8559	15	15.944
Niben101Scf00034g01013	-	-	-	-	Unknown protein	-	-	-	-	5.38864	5	4	5.81017	7	10.8006	3.06838	6.64316	6.32097	3	7.44055	3.69988	2	7.27481	1.86336	1.10467	3.11778	3.11778
Niben101Scf00034g01015	-	-	-	-	Unknown protein	-	-	-	-	0	0	0	0	0	0	0	0	0	0	0	0	0	0	1.16203	0	0	0
Niben101Scf00034g04002	-	-	IPR015300;	ref|XP_002519145.1|	DNA binding protein, putative [Ricinus communis] gb|EEF43356.1| DNA binding protein, putative [Ricinus communis]	-	-	-	-	67.0809	33.14	31.1778	51.963	44.0072	61	61	51.1295	56	62.6435	119.667	67.3806	61.1027	59	77.5943	35.1489	51	50.9237
Niben101Scf00034g04016	-	-	-	emb|CDY44055.1|	BnaA08g15510D [Brassica napus]	-	-	-	-	192.898	163	222.492	120.69	156.589	164.345	181	172.195	138.746	182	279.561	240.373	128.141	114.319	162.124	183.214	176	192
Niben101Scf00034g04018	-	-	IPR015300;	ref|XP_002519145.1|	DNA binding protein, putative [Ricinus communis] gb|EEF43356.1| DNA binding protein, putative [Ricinus communis]	-	-	-	-	153.063	120.246	162	165.242	198.448	178.956	315.935	117.436	96.0974	225	348	335.828	82	69.1238	86.9374	239.154	235.983	228
Niben101Scf00034g04020	-	-	IPR006968;	sp|Q67YT8|RUS4_ARATH	Protein root UVB sensitive 4	-	-	-	-	141.339	130.225	126	76	128.986	127	196.571	144.214	128.118	49.5143	45	64.839	102.672	141	147.575	74.5344	77.3266	57.1593
Niben101Scf00034g04023	-	-	IPR008892;	AT4G37220.1	Cold acclimation protein WCOR413 family LENGTH=202	-	-	-	-	1347.02	777.249	923.915	482	566.544	936.995	608	1480.94	1154.35	359.016	425.057	389.722	687.052	650	895	346.286	257	221.412
Niben101Scf00035g01004	-	-	IPR002885;IPR011990;	sp|Q9LFC5|PP360_ARATH	Pentatricopeptide repeat-containing protein	-	-	-	-	156.928	131.367	143.606	112.24	157.967	96.0974	163	108	182.439	59	71.2839	86.9374	111.036	141.168	119	106.294	81.3974	62
Niben101Scf00035g01005	-	-	-	ref|XP_002529720.1|	conserved hypothetical protein [Ricinus communis] gb|EEF32686.1| conserved hypothetical protein [Ricinus communis]	-	-	-	-	0	0	0	7.56042	3.06838	0	2.10699	2	0	5.54982	6	3.11778	0	1.10467	0	8.31407	7.18485	2
Niben101Scf00035g01009	-	K17411	IPR013219;	sp|P53305|RT27_YEAST	Mitochondrial 37S ribosomal protein S27	-	-	-	-	240	280.615	237.717	331	366.859	294.411	366.749	267.09	321.131	208.361	311	386	223.111	177	187.93	323.202	260.032	265.481
Niben101Scf00035g01012	-	K17800	IPR011685;IPR011992;	sp|Q5ZK33|LETM1_CHICK	LETM1 and EF-hand domain-containing protein 1, mitochondrial	-	-	-	-	1461.2	1173.32	1375.9	960	1145	1160.87	1024	1029.3	764.026	326.464	409.809	383	630.32	547.583	623	592.378	408.076	399.889
Niben101Scf00035t03002	-	-	-	-	-	-	-	-	-	0	0	0	0	0	0	0	0	0	0	1.10467	0	0	0	0	0	0	0
Niben101Scf00035t03003	-	-	-	-	-	-	-	-	-	0	1.03926	0	0	1.03926	1.03926	0	0	0	2.32407	0	0	0	0	0	0	0	0
Niben101Scf00037g01004	-	K16810	IPR016098;IPR017901;	sp|A4IF93|TBCC1_BOVIN	TBCC domain-containing protein 1	-	-	-	-	191	186	212.652	87	165.249	208.65	229.663	206.485	265	56.3356	36.9988	44	213.048	137.889	228.666	102.887	82.1015	61.0713
Niben101Scf00037g01005	-	-	IPR001763;	sp|O48529|STR9_ARATH	Rhodanese-like domain-containing protein 9, chloroplastic	-	-	-	-	219.127	577	75.4684	50.8734	393	783.601	61.4909	203.258	240.069	139.261	133.818	271	220	268.43	218	119.887	95.1197	86.3611
Niben101Scf00037g02012	-	-	IPR008491;	sp|Q9JLH7|CK5P3_RAT	CDK5 regulatory subunit-associated protein 3	-	-	-	-	678.264	586.142	623.556	682.561	812	687	877.336	644	723.64	730.274	667.163	847.01	476	467.691	493.009	834	732.678	626.089
Niben101Scf00037g02013	-	-	IPR000467;	ref|XP_002532342.1|	nucleic acid binding protein, putative [Ricinus communis] gb|EEF30044.1| nucleic acid binding protein, putative [Ricinus communis]	-	-	-	-	68	86.4048	74.6639	42.706	72.6911	88	81.846	75.8476	69	63.3948	109.007	95.0012	49.8844	60.277	88.0145	69	69	75.5323
Niben101Scf00037g02016	GO:0003677;GO:0005634;	-	IPR004333;	sp|Q700W2|SPL9_ARATH	Squamosa promoter-binding-like protein 9	-	GO:0005634//nucleus;	GO:0003677//DNA binding;	-	2.77491	1	4.15704	3.72672	3.314	8.31407	2.07852	5.38864	6	7	8.13424	18	25.9214	25.5698	23.7256	9.48145	10	14.8811
Niben101Scf00037g02018	GO:0004672;GO:0005524;GO:0006468;GO:0016772;	-	IPR011009;IPR013320;	sp|Q9LHP4|RCH2_ARATH	Receptor-like protein kinase 2	GO:0006468//protein phosphorylation;	-	GO:0004672//protein kinase activity;GO:0005524//ATP binding;GO:0016772//transferase activity, transferring phosphorus-containing groups;	-	0	1	1	0	0	2.16012	0	0	0	1	0	0	0	1.03926	0	0	0	0
Niben101Scf00037g03004	-	-	-	emb|CDX67716.1|	BnaA07g17560D [Brassica napus]	-	-	-	-	45.5531	34.7653	45	17.007	10.1747	48	57.1593	46.584	92.7919	5.1963	7.27481	13.4716	4	11	23.2407	4	1.08006	8.18234
Niben101Scf00039g01002	GO:0003677;GO:0004518;GO:0006259;	K08991	IPR011335;	sp|Q5W9E7|MUS81_ARATH	Crossover junction endonuclease MUS81	GO:0006259//DNA metabolic process;	-	GO:0003677//DNA binding;GO:0004518//nuclease activity;	ko03440(Homologous recombination)	130.435	125.932	127.829	60.277	95.1993	133	250	205.68	200	90.725	82.8462	130.965	180.148	129	150.937	98.9719	87	91.4548
Niben101Scf00039g01003	GO:0003824;GO:0008762;GO:0016491;GO:0016614;GO:0050660;GO:0055114;	-	IPR012951;IPR016166;	AT5G44440.1	FAD-binding Berberine family protein LENGTH=533	GO:0055114//obsolete oxidation-reduction process;	-	GO:0003824//catalytic activity;GO:0008762//UDP-N-acetylmuramate dehydrogenase activity;GO:0016491//oxidoreductase activity;GO:0016614//oxidoreductase activity, acting on CH-OH group of donors;GO:0050660//flavin adenine dinucleotide binding;	-	5.81017	2	2.16012	2.04559	1.89805	3.16048	1	0	0	0	2.07852	0	0	0	3.11778	1.79621	1	0
Niben101Scf00039g01010	GO:0005515;GO:0008270;	-	IPR001841;	sp|Q86UK7|ZN598_HUMAN	Zinc finger protein 598	-	-	GO:0005515//protein binding;GO:0008270//zinc ion binding;	-	814.208	603.081	586	547.69	605.592	818.557	1031.98	870.899	850.507	598	652	900.577	905	915.891	855.055	691.837	675.29	595
Niben101Scf00039g01013	GO:0003993;GO:0016787;GO:0046872;	-	IPR008963;IPR029052;	AT5G50400.1	purple acid phosphatase 27 LENGTH=611	-	-	GO:0003993//acid phosphatase activity;GO:0016787//hydrolase activity;GO:0046872//metal ion binding;	-	76.9052	112.263	99	29	53.4536	50	105.846	105.348	59.7884	35.8188	28	55.2726	21.2743	27	35.3348	33.5405	41.9773	35.3348
Niben101Scf00043g00002	-	-	-	-	Unknown protein	-	-	-	-	0	0	0	0	1.06294	3.69988	0	0	0	0	1.03926	0	0	0	0	0	0	0
Niben101Scf00043g01001	GO:0005634;GO:0006367;GO:0046982;	K03135	IPR006809;	sp|Q9M565|TAF11_ARATH	Transcription initiation factor TFIID subunit 11	GO:0006367//transcription initiation from RNA polymerase II promoter;	GO:0005634//nucleus;	GO:0046982//protein heterodimerization activity;	ko03022(Basal transcription factors)	156.928	132.299	171.223	112.24	130.947	142.799	274	168	202.194	79	100.446	98.1881	148.048	147.489	205	139.244	135.046	97
Niben101Scf00043g03001	GO:0005524;GO:0044267;	K04077	IPR002423;IPR027409;IPR027413;	sp|Q5WJN4|CH60_BACSK	60 kDa chaperonin	GO:0044267//cellular protein metabolic process;	-	GO:0005524//ATP binding;	ko03018(RNA degradation)	121	127.824	43	24.8414	71.5955	100.596	60.0492	84	138.182	5.54982	10	6.23556	0.93168	9.94199	4.15704	10.3926	5.38864	10
Niben101Scf00043g03002	-	-	-	sp|A0RNU4|HEMH_CAMFF	Ferrochelatase	-	-	-	-	32	23.3846	16.6495	28	28.06	44.7206	22.0933	29.0993	19.7459	14.3697	35	7	8.13424	5	8.64048	22.5014	10.4392	13.6954
Niben101Scf00043g03003	-	-	-	gb|KEH24534.1|	stress regulated protein [Medicago truncatula]	-	-	-	-	24.9422	14.5496	14.3697	8	4	20.9166	34	21.6012	54.208	11.3883	14.7489	6	37.2027	34.2239	31	7.27481	12.1118	13.256
Niben101Scf00043g03010	GO:0003677;GO:0003700;GO:0006355;GO:0043565;	-	IPR004827;	sp|O24160|TGA21_TOBAC	TGACG-sequence-specific DNA-binding protein TGA-2.1	GO:0006355//regulation of transcription, DNA-templated;	-	GO:0003677//DNA binding;GO:0003700//DNA-binding transcription factor activity;GO:0043565//sequence-specific DNA binding;	-	0	1.02279	0	0	0	0	0	1	0	0.93168	1.10467	3.11778	2.07852	0	0	5	3.4861	2
Niben101Scf00043g03012	GO:0004616;GO:0006098;GO:0016491;GO:0016616;GO:0050661;GO:0050662;GO:0055114;	K00033	IPR006113;IPR008927;IPR016040;	sp|Q9FWA3|6GPD3_ARATH	6-phosphogluconate dehydrogenase, decarboxylating 3	GO:0006098//pentose-phosphate shunt;GO:0055114//obsolete oxidation-reduction process;	-	GO:0004616//phosphogluconate dehydrogenase (decarboxylating) activity;GO:0016491//oxidoreductase activity;GO:0016616//oxidoreductase activity, acting on the CH-OH group of donors, NAD or NADP as acceptor;GO:0050661//NADP binding;GO:0050662//obsolete coenzyme binding;	ko00480(Glutathione metabolism);ko00030(Pentose phosphate pathway)	3100	2694.8	2837.9	3454.29	4119.62	3483.6	2364.72	2211	1589	1978.94	2802	1526.12	1119.96	860.763	1214.68	1967	1788.92	1380.06
Niben101Scf00043g03015	-	-	IPR016181;	sp|D7GG24|MSHD_PROFC	Mycothiol acetyltransferase	-	-	-	-	0	1	0	2	0	2.04559	0	0	0	0	0.924971	1	2.07852	1.86336	4.41866	0	0	1.79621
Niben101Scf00043g03016	-	-	-	ref|NP_001063452.2|	[Oryza sativa Japonica Group] dbj|BAF25366.2| [Oryza sativa Japonica Group]	-	-	-	-	1.05349	0	1.06294	0	0	1.03926	0.93168	1.10467	0	1.03926	5.38864	1	2	6.97221	2	9.72054	6.13676	5.69414
Niben101Scf00044g00016	GO:0005506;GO:0016705;GO:0020037;GO:0055114;	-	IPR001128;	AT5G07990.1	Cytochrome P450 superfamily protein LENGTH=513	GO:0055114//obsolete oxidation-reduction process;	-	GO:0005506//iron ion binding;GO:0016705//oxidoreductase activity, acting on paired donors, with incorporation or reduction of molecular oxygen;GO:0020037//heme binding;	-	90.5825	35.3348	21.8244	145.493	148	186	29.0509	51	17.281	31.7066	11.3883	28.4444	11	15.944	11.0996	103	92.4941	101.553
Niben101Scf00044g00020	GO:0005643;GO:0006913;	K14307	IPR024882;	sp|P70581|NUPL1_RAT	Nucleoporin p58/p45	GO:0006913//nucleocytoplasmic transport;	GO:0005643//nuclear pore;	-	ko03013(Nucleocytoplasmic transport)	546	609.154	505.259	580.802	658.434	490	599.495	434.736	580	357.505	273.914	525.821	530.022	359.584	392.473	527	454	507.809
Niben101Scf00044g00021	-	-	IPR029415;	AT3G50430.1	unknown protein; Has 54 Blast hits to 54 proteins in 22 species: Archae - 0; Bacteria - 0; Metazoa - 29; Fungi - 0; Plants - 24; Viruses - 0; Other Eukaryotes - 1 (source: NCBI BLink). LENGTH=642	-	-	-	-	10.1747	9	15.5889	35.4038	50.8146	69.6304	17.6674	26.9432	18	49	42.9953	78	17.281	13.2963	9.49023	29.4979	38	23.3846
Niben101Scf00044g00024	-	-	IPR002885;	sp|Q9M1V3|PP296_ARATH	Pentatricopeptide repeat-containing protein	-	-	-	-	18.8602	17	10	8.13424	21	10.8006	23.5242	9.49023	20.0164	9	25.5104	7.39977	10	5.1963	6.52176	11.0467	7.27481	16.6281
Niben101Scf00046g00002	GO:0004672;GO:0004674;GO:0005524;GO:0006468;GO:0016772;	-	IPR011009;	AT3G27580.1	Protein kinase superfamily protein LENGTH=578	GO:0006468//protein phosphorylation;	-	GO:0004672//protein kinase activity;GO:0004674//protein serine/threonine kinase activity;GO:0005524//ATP binding;GO:0016772//transferase activity, transferring phosphorus-containing groups;	-	106.291	79.0121	95	31.8881	39.7737	60	130.947	83.8512	180.06	31.1778	28.06	34.1281	154	180	218.463	67	61.5634	67.5043
Niben101Scf00046g00003	-	-	IPR009737;	sp|Q6BPT6|AIM32_DEBHA	Altered inheritance of mitochondria protein 32	-	-	-	-	932.611	769.952	722.285	410.507	445.461	704	1135	1239.89	1182	170.649	190.239	160.385	1010.3	940	1234.07	284.891	271	287.875
Niben101Scf00046g00015	-	-	-	AT5G40500.1	unknown protein; Has 30201 Blast hits to 17322 proteins in 780 species: Archae - 12; Bacteria - 1396; Metazoa - 17338; Fungi - 3422; Plants - 5037; Viruses - 0; Other Eukaryotes - 2996 (source: NCBI BLink). LENGTH=123	-	-	-	-	70.8841	68	49.6827	54.208	50.2982	90.6005	61	115.86	76.7726	36	34.2956	18.6336	41.9773	39.4919	53.0022	23.3508	11	8
Niben101Scf00046g01017	-	K14850	IPR007823;IPR029063;	sp|Q84JC0|RRP8_ARATH	Ribosomal RNA-processing protein 8	-	-	-	-	190.265	136.896	149	311.778	276.709	250.759	204.734	218.244	161.659	263	342	399.74	155	162.009	148.305	254.338	303.406	279
Niben101Scf00046g01018	-	-	IPR016087;	gb|AHB32112.1|	chalcone isomerase [Camellia sinensis]	-	-	-	-	0	0	0	0	0	2	0	0	0	193.843	299	255.104	0.924971	2	0	231.057	207.677	202.656
Niben101Scf00046g01019	-	-	IPR004268;	gb|AHF62658.1|	integral membrane protein MviN [Synechococcus sp. WH 8109]	-	-	-	-	7.15955	10.4392	5.26747	2	5.31468	9.24971	5	5.1963	5.59008	6.62799	7.27481	11.4319	5.38864	3	4	19.7546	8	7.56042
Niben101Scf00046g02003	GO:0003830;GO:0006487;GO:0016020;	K00737	IPR006813;	AT1G67880.1	beta-1,4-N-acetylglucosaminyltransferase family protein LENGTH=390	GO:0006487//protein N-linked glycosylation;	GO:0016020//membrane;	GO:0003830//beta-1,4-mannosylglycoprotein 4-beta-N-acetylglucosaminyltransferase activity;	ko00510(N-Glycan biosynthesis)	543.533	430.436	529.135	360.623	551.847	385.288	370	295	230.083	567	488.187	563.559	317.923	307.62	375	581.425	399.587	430
Niben101Scf00046g02008	GO:0003677;GO:0006355;	-	IPR003441;	sp|Q6NQK2|NAC8_ARATH	NAC domain-containing protein 8	GO:0006355//regulation of transcription, DNA-templated;	-	GO:0003677//DNA binding;	-	229	259.134	252	144.728	248.539	323.617	148.543	222	280.615	678.929	558	737.874	307.454	341.342	369.976	1443.53	1043.6	1096
Niben101Scf00046g02010	GO:0004672;GO:0004674;GO:0005524;GO:0006468;GO:0016772;	-	IPR011009;IPR015784;	AT5G50180.1	Protein kinase superfamily protein LENGTH=346	GO:0006468//protein phosphorylation;	-	GO:0004672//protein kinase activity;GO:0004674//protein serine/threonine kinase activity;GO:0005524//ATP binding;GO:0016772//transferase activity, transferring phosphorus-containing groups;	-	208	210.461	196.094	103	100.808	124.845	339.132	273.325	340.877	109.569	124	101	406.712	392	520.589	401.957	337.852	292.872
Niben101Scf00046g03001	GO:0005524;GO:0005737;GO:0008152;GO:0016301;GO:0016773;	K16190	IPR006206;	AT5G14470.1	GHMP kinase family protein LENGTH=366	GO:0008152//metabolic process;	GO:0005737//cytoplasm;	GO:0005524//ATP binding;GO:0016301//kinase activity;GO:0016773//phosphotransferase activity, alcohol group as acceptor;	ko00520(Amino sugar and nucleotide sugar metabolism);ko00053(Ascorbate and aldarate metabolism);ko00040(Pentose and glucuronate interconversions)	303.464	213.048	158.965	278	327	441.573	165	219.252	183.08	121.475	124.312	143	247.664	169.27	311	207.852	168.634	207.677
Niben101Scf00046g03002	GO:0005515;GO:0008270;	K16280	IPR002035;IPR010734;IPR013083;	sp|Q9LY87|RGLG2_ARATH	E3 ubiquitin-protein ligase RGLG2	-	-	GO:0005515//protein binding;GO:0008270//zinc ion binding;	-	3136.49	2968.14	2588.93	2680.09	2524	2288.5	3637.91	2161	1232.56	1472.05	1929.85	1528.75	1524.59	1046.29	1366	3741	3889.33	2723
Niben101Scf00046g03003	-	-	IPR008833;	sp|P09926|SURF2_MOUSE	Surfeit locus protein 2	-	-	-	-	421	460.392	490.995	599.833	680.715	486.373	333.198	321	287	614.716	645	982.854	231.151	255.287	308.674	446	372.027	294.141
Niben101Scf00046g04007	-	-	IPR002885;	sp|Q9T0D6|PP306_ARATH	Pentatricopeptide repeat-containing protein	-	-	-	-	301	255	252.162	124	213.852	296.61	236.307	348.707	294	179.636	191.469	212	275.404	171.429	269.538	146.536	134.064	109.569
Niben101Scf00046g04019	GO:0006629;GO:0016788;	-	IPR013830;	sp|Q9LY84|GDL76_ARATH	GDSL esterase/lipase	GO:0006629//lipid metabolic process;	-	GO:0016788//hydrolase activity, acting on ester bonds;	-	0	1	37.2027	32.374	1	1.03926	21.4286	1.10467	2.07852	25.9815	8.98107	1	0	0	1	16.2009	14.3191	8.5412
Niben101Scf00046g04020	-	-	-	sp|Q9SFC7|FB135_ARATH	F-box protein	-	-	-	-	9.94199	28.06	17.6674	11.6754	13	14	37.1851	16	18.361	12.2735	27.5217	45.3003	6	13.8182	8.32474	35	17.6674	22.3603
Niben101Scf00046g04021	-	-	IPR001810;IPR017451;	sp|Q9SVX4|FB205_ARATH	F-box protein	-	-	-	-	11	11.8807	12.2735	8.5412	8.42796	15	22.3216	9.24971	18	19.7459	18.6336	33.14	5.1963	12.4711	8.98107	10	15	19.7546
Niben101Scf00046g04022	-	-	IPR007877;	AT1G67850.1	Protein of unknown function (DUF707) LENGTH=404	-	-	-	-	771.426	898	1056.93	539.443	588.786	604.849	1330.25	897.209	1071	252	348.61	330	747.401	691.408	819.955	573.101	523	469.817
Niben101Scf00046g04025	-	K11364	IPR010750;	AT3G27460.1	SGF29 tudor-like domain LENGTH=270	-	-	-	-	255.96	217	184	232.407	291	386.661	243.425	347.342	402.435	253	303.999	258.992	150	140.3	136.957	257.387	198.499	203.695
Niben101Scf00046g04027	GO:0001522;GO:0003723;GO:0006396;GO:0009451;GO:0009982;	K03177	IPR002501;	sp|Q46ZP3|TRUB_CUPPJ	tRNA pseudouridine synthase B	GO:0001522//pseudouridine synthesis;GO:0006396//RNA processing;GO:0009451//RNA modification;	-	GO:0003723//RNA binding;GO:0009982//pseudouridine synthase activity;	-	382.456	383.472	230	200.895	239.567	303	409.468	435.094	541.286	90.4156	117.436	128.429	296	358	469.462	131	144.728	140.123
Niben101Scf00046g05001	-	K14785	IPR012677;	sp|O74362|ESF2_SCHPO	Pre-rRNA-processing protein esf2	-	-	-	-	0	1.10467	0	16.6281	10.7773	4	0	0	0	73.4441	46.0257	45.5531	2.10699	2	0	46.2485	52	45.7274
Niben101Scf00046g05006	GO:0005515;GO:0008270;	K10664	IPR013083;	sp|Q7L0R7|RNF44_HUMAN	RING finger protein 44	-	-	GO:0005515//protein binding;GO:0008270//zinc ion binding;	-	857.582	1035	544.35	1843.07	2590.83	1368.49	654	1088.45	404.212	2397	2330.02	2168.95	303.783	259.815	262.933	1959.67	2064	1969
Niben101Scf00046g05007	-	K10664	-	dbj|BAC23030.1|	ring H2 zinc finger [Solanum tuberosum]	-	-	-	-	34.0139	52.7233	25	169.399	160.249	113.781	61.3163	81.0622	26.9432	145	155	224.273	20	12.9607	17.3875	148.997	139.061	127
Niben101Scf00046g05010	-	-	IPR013177;	sp|B9EB52|DIVIB_MACCJ	Cell division protein DivIB	-	-	-	-	44.6881	44.0072	70	42	65.0739	70	85.3247	77.7322	35.1138	57.9422	77	58.4614	28.6741	23	51.963	54.9691	54.1286	60.277
Niben101Scf00046g05013	-	K01728	IPR011050;IPR018082;	sp|O24554|PLY_ZINVI	Pectate lyase	-	-	-	ko00040(Pentose and glucuronate interconversions)	7.15955	12.3373	7.37446	5	4.25174	19.4244	7	8.31407	11.1802	0	1.03926	2.07852	18.8602	18	20	0	0	0
Niben101Scf00046g05014	GO:0005525;GO:0005622;GO:0006184;GO:0007165;GO:0007264;GO:0015031;GO:0016020;	K07877	IPR001806;IPR027417;	sp|Q2HJI8|RAB8B_BOVIN	Ras-related protein Rab-8B	GO:0006184//obsolete GTP catabolic process;GO:0007165//signal transduction;GO:0007264//small GTPase mediated signal transduction;GO:0015031//protein transport;	GO:0005622//intracellular anatomical structure;GO:0016020//membrane;	GO:0005525//GTP binding;	-	38.4526	52.1741	36.4539	37.4133	39.4919	40.4148	57	77	68.56	67	88.5649	50.1168	46.5021	27.3909	37	75.4684	58.2732	47
Niben101Scf00046g06001	-	-	IPR029071;	sp|Q0WPX7|BAG2_ARATH	BAG family molecular chaperone regulator 2	-	-	-	-	29	29.0509	7	5.4003	15.3419	14.2353	21.0699	34	73.3425	9.24971	5	18.7067	9.3168	45.2913	33.2563	8.31407	3.59243	8
Niben101Scf00046g06006	-	-	IPR002885;IPR011990;	sp|Q9SH60|PP103_ARATH	Pentatricopeptide repeat-containing protein	-	-	-	-	263	210.461	73.0727	13	32.217	123.913	160.176	193.302	272.286	19.7584	19	39	746.026	823	824.086	28.6382	21.8275	20.0164
Niben101Scf00046g07007	-	-	IPR015300;	sp|Q9LS06|RAVL4_ARATH	AP2/ERF and B3 domain-containing transcription factor ARF14	-	-	-	-	0	0	0.898107	0	0	2.32407	0	2.16012	0	0	0	1	0	0.924971	1	1.03926	0.93168	2.20933
Niben101Scf00046g07010	-	K07556	IPR011419;IPR023335;	ref|WP_014328084.1|	ATPase [Sinorhizobium fredii] ref|YP_005188430.1| ATP synthase mitochondrial F1 complex assembly factor 2 ATP12 [Sinorhizobium fredii HH103] emb|CCE95605.1| ATP synthase mitochondrial F1 complex assembly factor 2 ATP12 homolog; Flags: Precursor [Sinorhizobium fredii HH103]	-	-	-	-	114.486	99.2109	85.412	97.975	96	114.797	112.846	127	149.653	61.4909	67.3846	68.5911	97.6904	87.1164	90	58	47.6434	59
Niben101Scf00046g07015	-	K12386	IPR005282;	sp|P57758|CTNS_ARATH	Cystinosin homolog	-	-	-	-	1	3.11778	0	3.314	2.07852	0	1.79621	1	1	1.16203	2	4.32024	1.02279	1.89805	2.10699	8	2.12587	3.69988
Niben101Scf00046g07016	GO:0008152;GO:0016491;	K10251	IPR002347;	sp|Q3T0R4|DRS7B_BOVIN	Dehydrogenase/reductase SDR family member 7B	GO:0008152//metabolic process;	-	GO:0016491//oxidoreductase activity;	ko01040(Biosynthesis of unsaturated fatty acids);ko00062(Fatty acid elongation)	173	91	137.12	73	102.606	142.168	125.271	163.292	196	109.482	80.4725	118	172.517	211.491	287.213	193.302	144.457	110.467
Niben101Scf00046g07018	-	-	-	ref|XP_003601496.1|	Membrane protein, putative [Medicago truncatula]	-	-	-	-	146.436	150	139.244	62.898	102	150.693	164.907	176.746	192.263	40.5311	53.8864	67	111	174.305	176	35.642	25.5698	24.6746
Niben101Scf00046g07019	-	-	-	ref|XP_003601496.1|	Membrane protein, putative [Medicago truncatula]	-	-	-	-	3.314	4.15704	4.15704	0.898107	0	0	1.16203	1	3.24018	0	0	0	0	0	0.924971	0	0	0
Niben101Scf00046g07021	-	-	IPR008700;	AT5G55850.2	RPM1-interacting protein 4 (RIN4) family protein LENGTH=130	-	-	-	-	6	7.56042	6.13676	13.2863	28.4444	17	17.007	21.2743	13	12.4711	11.1802	12.1513	0	0	2.69432	25	17	20.9166
Niben101Scf00046g07025	-	K07556	IPR011419;IPR023335;	sp|Q8N5M1|ATPF2_HUMAN	ATP synthase mitochondrial F1 complex assembly factor 2	-	-	-	-	76.7726	56	72.7481	60.5592	79.5359	97.6904	98.7296	85.3201	99	49	55.7777	54	79.9244	68.5271	83.514	61.1027	52	43.5803
Niben101Scf00046g07031	-	-	IPR008972;	sp|Q9SK27|ENL1_ARATH	Early nodulin-like protein 1	-	-	-	-	0	0	0	0	0	0	0	0	0	0	0	0	0	0	0.93168	0	0	0
Niben101Scf00046g07033	-	-	-	-	Unknown protein	-	-	-	-	18.0314	16.8559	12	17.007	11.0996	11	36.3741	20.497	34.2446	30.1385	34.2956	26.9432	22	29	32.537	35	34.5619	32.7294
Niben101Scf00046g08003	-	-	IPR027329;	AT3G01710.1	TPX2 (targeting protein for Xklp2) protein family LENGTH=391	-	-	-	-	27.0187	37.5586	12.4711	53.0022	77.2372	71	19	51.1295	26	358.58	234.219	167.028	45.3003	34	45.7062	105.447	96	107.044
Niben101Scf00046g08004	-	-	IPR005225;IPR008144;IPR016484;IPR027417;	sp|A4WUI6|DER_RHOS5	GTPase Der	-	-	-	-	534.536	655	330.498	363.091	587.445	564.673	383	517.649	500.409	501	593.417	644.722	512.565	459.353	469.745	482.283	519	425
Niben101Scf00046g08005	-	-	-	emb|CDY36373.1|	BnaC04g32810D [Brassica napus]	-	-	-	-	871.607	1319.01	1159	5122.51	4876.41	2906.37	775.287	1014.32	475.997	32587	30561	51374.7	1246	1153.5	963.471	20154.4	19773	17505
Niben101Scf00046g09009	-	-	IPR008166;	sp|B9SLR1|Y231_RICCO	UPF0392 protein RCOM_0530710	-	-	-	-	97.6904	151.78	150	277	118.528	113	152.288	218.878	83.514	182.255	102	222.153	169.27	141	215.127	308.386	264.015	218.244
Niben101Scf00046g09010	GO:0003677;GO:0003682;	K09422	IPR009057;	sp|P81394|MYB15_ANTMA	Myb-related protein 315	-	-	GO:0003677//DNA binding;GO:0003682//chromatin binding;	-	2.04559	0.949023	1.05349	5	6.37761	4.62485	0	4.15704	0	2.20933	1.03926	3.11778	2.69432	1	0	2.32407	5	0
Niben101Scf00046g09011	GO:0005515;GO:0008270;GO:0046872;	-	IPR013083;	sp|Q5C8T6|TRIM5_GORGO	Tripartite motif-containing protein 5	-	-	GO:0005515//protein binding;GO:0008270//zinc ion binding;GO:0046872//metal ion binding;	-	3.11778	3.72672	2.20933	0	2.07852	0.898107	0	3	3.4861	19	71.2839	30.6838	5.69414	6.32097	3	76.5313	73.9977	77
Niben101Scf00046g09013	GO:0008152;GO:0016787;	-	IPR029058;	sp|B4TMG8|AES_SALSV	Acetyl esterase	GO:0008152//metabolic process;	-	GO:0016787//hydrolase activity;	-	304	331.18	278	476.306	402.98	331.209	375.044	319	377.342	442.136	594	398.036	357.765	353.493	386.604	550.807	403.25	473
Niben101Scf00046g09025	-	-	-	gb|AES78631.2|	acting on ester bonds hydrolase [Medicago truncatula]	-	-	-	-	232	203.021	165.57	108	121.593	164.907	204.363	227.598	273.325	140.105	176	125	206.842	152	190.091	151.373	116.73	133.794
Niben101Scf00046t03018	-	-	-	-	-	-	-	-	-	2.07852	2.07852	0.898107	1	0	0	0	0	0	0	1.05349	1	0	0	0	1.03926	0	0
Niben101Scf00047g02009	-	-	IPR008166;	AT4G20170.1	Domain of unknown function (DUF23) LENGTH=504	-	-	-	-	291.616	340.59	142.353	26.3374	58	105.231	106.372	167	268.129	25.1554	32.0353	16.6281	577.828	735.55	888	39	37.1851	15
Niben101Scf00047g02014	-	K15535	-	sp|Q6ZY51|PWD_ARATH	Phosphoglucan, water dikinase, chloroplastic	-	-	-	-	1821	1149.42	479.815	113.781	382.447	1266.86	1017.56	1867	1985	59.2638	43	55.083	735.388	730.747	975.536	71	83.9719	54.5733
Niben101Scf00047g03001	GO:0008152;GO:0016758;	-	IPR002213;	AT2G29710.1	UDP-Glycosyltransferase superfamily protein LENGTH=467	GO:0008152//metabolic process;	-	GO:0016758//hexosyltransferase activity;	-	318	174	431.115	383	555.151	436.732	1053.42	1035.59	484	117.986	102.672	105	252.54	190.063	368.958	226.559	280.6	129.327
Niben101Scf00047g03003	-	-	IPR001395;IPR023210;	sp|B7UIL2|GLND_ECO27	Bifunctional uridylyltransferase/uridylyl-removing enzyme	-	-	-	-	0	2	4.25174	5.54982	2	8.31407	2.79504	5.52333	4.15704	3.11778	2.69432	2	5	10.4583	9	5.4003	3.06838	0.949023
Niben101Scf00047g03004	-	-	IPR001395;IPR023210;	sp|P40690|ALKE_BABBO	Aldo-keto reductase	-	-	-	-	54.1286	56.12	53.0022	29.6375	43	61	79.0184	80	73.4441	92.0513	38.9099	123.259	96	117.986	102.672	67	46.7667	51.2424
Niben101Scf00047g03008	-	-	IPR001395;IPR023210;	sp|O80944|AKRC8_ARATH	Aldo-keto reductase family 4 member C8	-	-	-	-	24	17.281	14.3191	8.5412	21.0699	19	20.1958	26.8242	38	19.7459	17.7019	16.57	14.5496	13.5104	27.8413	21	13	22.0787
Niben101Scf00047g03012	-	-	IPR011598;	sp|Q8H102|BH128_ARATH	Transcription factor bHLH128	-	-	-	-	288.591	396	357.505	349.38	382.214	417.782	515.473	524.494	358	158	153.389	134	222.492	149.328	220.173	209.645	149	141.37
Niben101Scf00047g03013	-	-	IPR020864;	AT1G14780.1	MAC/Perforin domain-containing protein LENGTH=627	-	-	-	-	1472.9	1745	1024	1791.86	2534	2058.59	1318.38	1488.07	1361.12	2255	2320.39	2025.69	981	879.213	968.947	2641.25	2176.21	2294.68
Niben101Scf00047g03014	-	-	IPR010686;	AT1G05510.1	Protein of unknown function (DUF1264) LENGTH=241	-	-	-	-	0	0	2	1.06294	0.924971	1	0	0	0	2.07852	1.03926	1.79621	0	1	0	3	2.16012	1.02279
Niben101Scf00047g03022	-	-	-	gb|ABW97846.1|	MYC [Nicotiana tabacum]	-	-	-	-	204.97	296.05	251.501	259.815	224.527	241	389	402.064	257	124.207	117.621	80.6669	149.596	116	142.433	173.895	114	146.536
Niben101Scf00047g03028	-	-	-	AT1G10800.1	unknown protein; FUNCTIONS IN: molecular_function unknown; INVOLVED IN: biological_process unknown; LOCATED IN: endomembrane system; EXPRESSED IN: inflorescence meristem, hypocotyl, root, flower; EXPRESSED DURING: petal differentiation and expansion stage; Has 23 Blast hits to 23 proteins in 9 species: Archae - 0; Bacteria - 0; Metazoa - 0; Fungi - 0; Plants - 22; Viruses - 0; Other Eukaryotes - …	-	-	-	-	3.4861	9	2.16012	5.11396	5.69414	1.05349	5	2.12587	0	3	0	0.93168	1.10467	1.03926	6.23556	2.69432	1	0
Niben101Scf00047t03034	-	-	-	-	-	-	-	-	-	3.18881	5.54982	3	1.03926	1.86336	5.52333	5.1963	0	1.79621	3	3	6.97221	0	4.32024	2.04559	0.949023	1.05349	2
Niben101Scf00048g00003	GO:0003677;GO:0006355;	-	IPR003441;	sp|Q94F58|NAC89_ARATH	NAC domain-containing protein 89	GO:0006355//regulation of transcription, DNA-templated;	-	GO:0003677//DNA binding;	-	0	0	0	0	1.16203	1	0	2.04559	2.84707	0	0	0	0.924971	1	0	0	0	0
Niben101Scf00048g00004	GO:0003677;GO:0006355;	-	IPR003441;	sp|Q94F58|NAC89_ARATH	NAC domain-containing protein 89	GO:0006355//regulation of transcription, DNA-templated;	-	GO:0003677//DNA binding;	-	7.15955	2.84707	16.8559	4	3.18881	4.62485	50	8.31407	7.45344	6.62799	6.23556	4.15704	8.98107	8	11	9.29628	7	3.24018
Niben101Scf00048g00007	-	-	-	emb|CDY08510.1|	BnaA05g27460D [Brassica napus]	-	-	-	-	1.03926	8.38512	6.62799	1.03926	2.07852	5.38864	17	10	6.97221	1	0	3.06838	4.74511	3.16048	6	0	0	0
Niben101Scf00048g01007	GO:0004190;GO:0006508;	-	IPR001461;IPR021109;	sp|Q766C2|NEP2_NEPGR	Aspartic proteinase nepenthesin-2	GO:0006508//proteolysis;	-	GO:0004190//aspartic-type endopeptidase activity;	-	3	13.9444	6	0	2.04559	10.4392	6.32097	10	27.6363	3.69988	7	2.07852	10.2485	11.0467	17.6674	0	0.898107	0
Niben101Scf00049g00001	-	K12603	IPR005135;	sp|O74874|CCR4_SCHPO	Glucose-repressible alcohol dehydrogenase transcriptional effector	-	-	-	ko03018(RNA degradation)	108	85.0348	74.9226	46	101.847	94.0997	108.257	136.143	114.319	82.6258	68	66	102.259	82	114.486	57.2764	59.7884	57.9422
Niben101Scf00049g01003	GO:0004553;GO:0005975;	K15920	IPR002772;IPR017853;IPR026892;	sp|Q9FLG1|BXL4_ARATH	Beta-D-xylosidase 4	GO:0005975//carbohydrate metabolic process;	-	GO:0004553//hydrolase activity, hydrolyzing O-glycosyl compounds;	ko00520(Amino sugar and nucleotide sugar metabolism)	22.8637	43.6489	39.5167	112	96	39.5092	124	71.2839	54.208	9471.25	12394.4	12655	88.2236	210.893	142	6634.63	4996.6	5775.19
Niben101Scf00049g03001	-	K19882	IPR004963;	AT4G19420.1	Pectinacetylesterase family protein LENGTH=397	-	-	-	-	3.24018	2.04559	0.949023	0	1	0	4.62485	4	3.11778	0.93168	4.41866	0	0	0	0	2	0	1
Niben101Scf00049g03004	-	K19882	IPR004963;	AT4G19420.1	Pectinacetylesterase family protein LENGTH=397	-	-	-	-	1	1.03926	0	0	1.03926	2.07852	6.28675	14	5	0	1	0	1.02279	0.949023	0	1	2.12587	0
Niben101Scf00050g00008	GO:0005525;GO:0005622;GO:0006184;GO:0007165;GO:0007264;GO:0015031;GO:0016020;	K04392	IPR001806;IPR005225;IPR027417;	sp|P01122|RHO_APLCA	Ras-like GTP-binding protein RHO	GO:0006184//obsolete GTP catabolic process;GO:0007165//signal transduction;GO:0007264//small GTPase mediated signal transduction;GO:0015031//protein transport;	GO:0005622//intracellular anatomical structure;GO:0016020//membrane;	GO:0005525//GTP binding;	ko04145(Phagosome)	192	151	218.463	111	139.328	133.986	187.906	193.843	291	93.5383	75.8476	127	246.304	209.628	291.632	171.478	138.221	108.671
Niben101Scf00050g01002	-	-	IPR006041;IPR013783;	AT3G16670.1	Pollen Ole e 1 allergen and extensin family protein LENGTH=154	-	-	-	-	17.9094	56	53.1468	49.0235	28	25.9815	44.7206	39.7679	27.0207	93.5333	113.161	84	26	12.7824	14	29.1616	13.2963	7.59218
Niben101Scf00050g03001	-	-	IPR016135;IPR023313;	sp|P61077|UB2D3_HUMAN	Ubiquitin-conjugating enzyme E2 D3	-	-	-	-	1465.89	722.285	865.703	118.55	454	1285	1469.97	2150	1919.27	11.2507	1.89805	26.3374	1121	1858.01	1887.87	5	6.23556	2.79504
Niben101Scf00050g03002	-	-	IPR006461;	sp|Q8L7E9|MCAC1_ARATH	Protein MID1-COMPLEMENTING ACTIVITY 1	-	-	-	-	89	68.0438	58.2992	124.322	182.255	203	80.7831	46.2485	100	63.3948	118.323	100.525	183.949	150.693	111.365	27	32	48.8055
Niben101Scf00050g03004	-	-	IPR005651;	sp|A7ZK06|YCAR_ECO24	UPF0434 protein YcaR	-	-	-	-	55.4982	36	43.6489	20.497	36.4539	55.0807	51.963	50.294	52	17	39.5092	20	41.0423	41.9345	65.4826	26.3374	23	10.6294
Niben101Scf00050g03005	GO:0015031;GO:0030904;GO:0042147;	K18468	IPR005378;	sp|Q2HJG5|VPS35_BOVIN	Vacuolar protein sorting-associated protein 35	GO:0015031//protein transport;GO:0042147//retrograde transport, endosome to Golgi;	GO:0030904//retromer complex;	-	ko04144(Endocytosis)	1166.64	1229	1446	1743.05	1435	1278.79	2075.25	1546.91	1449.61	1849	2522.34	1905.44	916	948.844	1095.66	2470.03	2112.81	2042.14
Niben101Scf00050g03006	-	-	-	sp|Q5XF11|FB248_ARATH	F-box protein	-	-	-	-	35.1138	75.8516	47	23.3846	55.4982	78	39.4919	19.5653	61.8612	130.947	96.6511	125.735	12	13	18.5926	138	160.929	162.624
Niben101Scf00050g03017	GO:0004190;GO:0006508;	-	IPR001461;IPR021109;	AT4G35880.1	Eukaryotic aspartyl protease family protein LENGTH=524	GO:0006508//proteolysis;	-	GO:0004190//aspartic-type endopeptidase activity;	-	7.45344	4.41866	6.23556	0	0.898107	1	10	2.32407	5	1.08006	1.02279	0.949023	4.21398	2	1.06294	1.84994	4	1.03926
Niben101Scf00051g00011	GO:0000166;GO:0003676;	-	IPR012677;	sp|Q05196|PABP5_ARATH	Polyadenylate-binding protein 5	-	-	GO:0000166//nucleotide binding;GO:0003676//nucleic acid binding;	-	1643.12	1358	1634.13	1721.36	1602.9	1563.39	1863	1687.94	1869.37	1402	1783.37	1704.97	2215.96	1626.44	1745.96	2045.89	1940	1946
Niben101Scf00051g00013	-	-	-	emb|CDY43021.1|	BnaA03g11680D [Brassica napus]	-	-	-	-	0	0	0	0	0	0	0	0	0	2	0	0	0	0	0	0	0	0
Niben101Scf00051g01009	-	-	IPR000825;	ref|WP_008236070.1|	Iron-sulfur cluster assembly protein SufB [Richelia intracellularis] emb|CCH68427.1| Iron-sulfur cluster assembly protein SufB [Richelia intracellularis HH01]	-	-	-	-	2463.04	768.779	1333	535	837.827	1131	2390.17	2711.42	2489.29	215.966	197	307.188	1888.79	2370	2806	359.628	442.971	303.464
Niben101Scf00051g01015	-	-	-	ref|NP_001058682.1|	product [Oryza sativa Japonica Group]	-	-	-	-	235.242	175.569	183.308	124	155.189	176.669	275	277.482	337.268	141.397	192.263	129.907	391.575	566	579	240.541	166	231.133
Niben101Scf00051g03003	GO:0004672;GO:0004674;GO:0005524;GO:0006468;GO:0016772;	K13412	IPR011009;	sp|Q9SSF8|CDPKU_ARATH	Calcium-dependent protein kinase 30	GO:0006468//protein phosphorylation;	-	GO:0004672//protein kinase activity;GO:0004674//protein serine/threonine kinase activity;GO:0005524//ATP binding;GO:0016772//transferase activity, transferring phosphorus-containing groups;	ko04626(Plant-pathogen interaction)	880.253	1077.95	874.895	920.784	1316.74	553.234	903	712	765.781	688	1248.55	823.348	299.891	429.826	328	1661.37	1391.16	1429
Niben101Scf00051g03009	-	K13412	IPR011992;	AT4G21940.2	calcium-dependent protein kinase 15 LENGTH=561	-	-	-	ko04626(Plant-pathogen interaction)	337	574.045	388	428.784	476.621	348.291	450.896	424	362.461	342.239	508	347.113	175.156	151.339	178.753	752.424	544.253	660
Niben101Scf00051g03010	GO:0009522;GO:0009579;GO:0015979;GO:0016021;	K02690	IPR001280;	sp|Q49CB2|PSAB_CUSSA	Photosystem I P700 chlorophyll a apoprotein A2	GO:0015979//photosynthesis;	GO:0009522//photosystem I;GO:0009579//thylakoid;GO:0016021//integral component of membrane;	-	ko00195(Photosynthesis)	0	0	1.84994	1	1.03926	0	2.20933	1.03926	0	0.898107	0	1	0	0	0	0	1.89805	4.21398
Niben101Scf00051g04001	-	-	-	-	Unknown protein	-	-	-	-	0	0	0	0	0	0	1	0	0	0	0	0	1.06294	0	0	1.03926	0	0
Niben101Scf00051g04002	-	-	-	ref|XP_007026070.1|	Homer protein isoform 2 [Theobroma cacao] gb|EOY28692.1| Homer protein isoform 2 [Theobroma cacao]	-	-	-	-	0	0	0	0	0	0	0.924971	0	0	0	3.314	1.03926	0	0	0	3	1.16203	4
Niben101Scf00051g04005	-	-	IPR012474;	sp|A0SWL0|FRL2A_ARATH	FRIGIDA-like protein 2	-	-	-	-	110	77.9444	76.3977	69.5939	78.9837	71.7089	88.9126	84	107	69.7221	81	109.086	120.69	159.436	166.452	60	40.3915	38.8488
Niben101Scf00051g04021	-	-	IPR007608;	emb|CDX94069.1|	BnaC07g37030D [Brassica napus]	-	-	-	-	2	1	5.81017	3	1.08006	2.04559	18.0314	47.4073	44	0	0	4	33.2563	62.4225	95.0012	3.11778	8.31407	2.69432
Niben101Scf00051g05002	-	K08341	IPR004241;IPR029071;	sp|A2YS06|ATG8C_ORYSI	Autophagy-related protein 8C	-	-	-	ko04136(Autophagy - other)	379.258	336	483.635	447.686	498	501.962	775.158	750.068	503.001	898.959	826.258	1215	480	501.999	696	1586.61	1308.15	1151.16
Niben101Scf00051g05008	-	K15202	IPR019136;IPR029071;	sp|Q9Y5Q8|TF3C5_HUMAN	General transcription factor 3C polypeptide 5	-	-	-	-	36.4539	24.9422	28.06	3.59243	14	22	49.9675	24	55.083	9.20513	15.1844	23.1769	49	48.895	40.6987	21	20.7852	14.9069
Niben101Scf00051g05016	GO:0006355;GO:0042393;	-	IPR021998;	sp|Q8S8M9|ALFL6_ARATH	PHD finger protein ALFIN-LIKE 6	GO:0006355//regulation of transcription, DNA-templated;	-	GO:0042393//histone binding;	-	7	12.9607	7.15955	2.84707	10.5349	12	9.56642	11.0996	8	0	0	1.10467	5.1963	9.35333	2.69432	1	2	0
Niben101Scf00051g05017	-	K15202	IPR019136;	sp|Q9Y5Q8|TF3C5_HUMAN	General transcription factor 3C polypeptide 5	-	-	-	-	12.0246	13	11.4319	2.79504	1.10467	9.35333	20.7852	16.1659	19	5	13.9444	4	31.3217	35.7977	26.5726	25.2839	6	9.56642
Niben101Scf00052g04001	GO:0003676;GO:0046872;	-	IPR013087;	sp|Q9UJW8|ZN180_HUMAN	Zinc finger protein 180	-	-	GO:0003676//nucleic acid binding;GO:0046872//metal ion binding;	-	114.958	158	129	155.713	203	127.447	101.256	105.342	76.9051	99	64.839	157.245	94	88.337	94.0997	113.781	87.2978	85.2193
Niben101Scf00052g06003	GO:0003677;GO:0003682;	K09422	IPR009057;	sp|Q8CE22|DMTF1_MOUSE	Cyclin-D-binding Myb-like transcription factor 1	-	-	GO:0003677//DNA binding;GO:0003682//chromatin binding;	-	0	0	0	0	0	0	2.07852	0	0	0	0	0	0	0	0	0	0	0
Niben101Scf00052g08003	GO:0006511;GO:0036459;	K11842	IPR028889;	sp|A2XDG4|UBP26_ORYSI	Ubiquitin carboxyl-terminal hydrolase 26	GO:0006511//ubiquitin-dependent protein catabolic process;	-	-	-	142.547	155.758	200.577	122.633	116.754	146	298	252.162	251	57.2432	63.4131	54.0943	147.489	172	239.16	79.5475	94	93.5333
Niben101Scf00052g09009	GO:0004672;GO:0004674;GO:0005524;GO:0006468;GO:0016772;	K08819	IPR011009;	AT5G10270.1	cyclin-dependent kinase C;1 LENGTH=505	GO:0006468//protein phosphorylation;	-	GO:0004672//protein kinase activity;GO:0004674//protein serine/threonine kinase activity;GO:0005524//ATP binding;GO:0016772//transferase activity, transferring phosphorus-containing groups;	-	92.9628	86	66.9637	104.325	109.138	112.724	81	68.0278	62.898	186	246.304	182.609	55.2333	64.4341	57.1593	361.937	410	385
Niben101Scf00052g09012	-	K08819	-	sp|Q8W4P1|CDKC2_ARATH	Cyclin-dependent kinase C-2	-	-	-	-	9.56642	4.62485	4	5.1963	3.72672	8.83732	7.27481	7.27481	3.59243	3	6	4.64814	4	3.24018	5.11396	1.89805	3.16048	1
Niben101Scf00052g09016	-	-	-	sp|A2Q898|MCR1_ASPNC	NADH-cytochrome b5 reductase 2	-	-	-	-	54.0415	58.3769	14	18	33.699	76	27.0015	34.7749	80.6669	81.1191	100	81.846	86.0223	68	106.004	34.4722	30.9306	43.6489
Niben101Scf00054g00002	GO:0004222;GO:0006508;	-	IPR008915;	AT5G35220.1	Peptidase M50 family protein LENGTH=548	GO:0006508//proteolysis;	-	GO:0004222//metalloendopeptidase activity;	-	348.772	302.738	172.773	143	288.055	370.913	217	363.741	386.647	176.746	180.831	205.773	167.946	216	176	223.111	148	178.21
Niben101Scf00054g00003	-	-	-	gb|KEH25555.1|	transmembrane protein, putative [Medicago truncatula]	-	-	-	-	219.284	212.423	194.421	127.829	192.263	153.576	226	179	261.458	63	81.0045	79.7778	145.2	143.275	173	113.734	63.823	73
Niben101Scf00054g00013	GO:0003677;GO:0003682;	K09422	IPR009057;	sp|P81392|MYB06_ANTMA	Myb-related protein 306	-	-	GO:0003677//DNA binding;GO:0003682//chromatin binding;	-	33	63.9119	14	1.08006	9.20513	16.1334	49.5143	37	36.1398	0	0	1.03926	49.379	66.2799	49.8844	1.03926	0.898107	0
Niben101Scf00054g01010	GO:0015078;GO:0015991;GO:0033179;	K02146	IPR002843;	sp|Q9LHA4|VA0D2_ARATH	V-type proton ATPase subunit d2	-	GO:0033179//proton-transporting V-type ATPase, V0 domain;	GO:0015078//proton transmembrane transporter activity;	ko04145(Phagosome);ko00190(Oxidative phosphorylation)	1312	1173.48	1136.79	1067	1278.29	1208.39	1363.16	1132.79	1359.35	896.311	1173	974	869.202	634	856.487	1352.13	1049.62	1111.44
Niben101Scf00054g01013	GO:0003871;GO:0008270;GO:0008652;GO:0009086;	K00549	IPR006276;	sp|Q21N29|METE_SACD2	5-methyltetrahydropteroyltriglutamate--homocysteine methyltransferase	GO:0008652//cellular amino acid biosynthetic process;GO:0009086//methionine biosynthetic process;	-	GO:0003871//5-methyltetrahydropteroyltriglutamate-homocysteine S-methyltransferase activity;GO:0008270//zinc ion binding;	ko00450(Selenocompound metabolism);ko00270(Cysteine and methionine metabolism)	5420.78	5225.4	3523.27	2448	3162	4634.19	2050	2911.84	3508.18	1436.82	1683.48	1746	3188.81	1995.16	2422	1336.49	936.338	1056.06
Niben101Scf00055g00003	-	K17508	IPR001932;	AT4G16580.1	Protein phosphatase 2C family protein LENGTH=467	-	-	-	-	411.503	427.527	341.648	453.003	546	410.293	493.009	473	504.041	171.429	203.258	199.538	390.761	308.949	448	306	360.231	208
Niben101Scf00055g00004	-	-	-	-	Unknown protein	-	-	-	-	0	1.03926	0.93168	0	0	0	0.898107	0	0	0	0	0	0	0	0	1	1.06294	0
Niben101Scf00055g03005	GO:0008168;GO:0032259;	-	IPR007213;IPR029063;	ref|WP_014351734.1|	methyl transferase [Nocardia cyriacigeorgica] ref|YP_005264914.1| putative methyl transferase [Nocardia cyriacigeorgica GUH-2] emb|CCF64278.1| putative methyl transferase [Nocardia cyriacigeorgica GUH-2]	GO:0032259//methylation;	-	GO:0008168//methyltransferase activity;	-	16	5	1.16203	1	2.16012	9.20513	0	3.16048	13	0	0	0	4.15704	3.72672	7.73266	1.03926	0	0
Niben101Scf00055g03017	-	-	-	ref|NP_001275187.1|	SRE1A protein [Solanum tuberosum] gb|AAB93771.1| SRE1a [Solanum tuberosum]	-	-	-	-	4750.21	4358	3878.65	3180.05	3937	4577.94	5233.25	3958.01	2888.1	2501.5	3212.53	2620	2251	2932.98	3416	2796.27	2319.69	1705.39
Niben101Scf00055g03018	-	K14326	-	sp|Q9FJR0|RENT1_ARATH	Regulator of nonsense transcripts 1 homolog	-	-	-	ko03015(mRNA surveillance pathway);ko03013(Nucleocytoplasmic transport)	0	0	0	0	0	0	0	1	0	0	0	0	0	0	0	0	0	0
Niben101Scf00055g03019	-	-	IPR001251;IPR011074;	AT1G75170.1	Sec14p-like phosphatidylinositol transfer family protein LENGTH=296	-	-	-	-	597	522.749	404.003	26.5726	55.8352	223	959.83	826.924	1357	7.27481	7.45344	7.73266	1143.19	1070.44	1196.28	10	29	27.8888
Niben101Scf00055g03020	-	-	-	AT1G75180.1	Erythronate-4-phosphate dehydrogenase family protein LENGTH=315	-	-	-	-	494.859	555	742.031	448.138	525.821	461.431	925.98	544.253	693	395	414.846	383	1426.76	1440.09	1552.6	941.824	788	790.824
Niben101Scf00055g04003	GO:0004672;GO:0005515;GO:0005524;GO:0006468;GO:0016772;	-	IPR001611;IPR003591;IPR011009;IPR013320;IPR025875;	sp|Q9LIG2|RLK6_ARATH	Receptor-like protein kinase	GO:0006468//protein phosphorylation;	-	GO:0004672//protein kinase activity;GO:0005515//protein binding;GO:0005524//ATP binding;GO:0016772//transferase activity, transferring phosphorus-containing groups;	-	1105.57	707	2182	118.528	121	278.655	2315.6	1462.44	2199.7	44	23.3846	26.8242	1912	2509.81	2463.36	95.0012	98.7296	61.3163
Niben101Scf00056g01003	-	-	IPR016040;	emb|CCA15163.1|	conserved hypothetical protein [Albugo laibachii Nc14]	-	-	-	-	6.64316	18.9629	8	7.44055	8.32474	6	12.4711	6.52176	5.52333	3.11778	16.6281	77.2372	8	5	12.7824	24	24.8414	19.4331
Niben101Scf00056g02008	-	-	IPR025322;	emb|CDY02050.1|	BnaC04g14510D [Brassica napus]	-	-	-	-	4.6584	8.83732	2.07852	34.2956	8.98107	7	6	17.4305	3	2.16012	1.02279	5.69414	2.10699	1	3.18881	0	2	2.07852
Niben101Scf00056g03004	-	-	IPR003656;	gb|ABA94758.1|	hAT family dimerisation domain containing protein [Oryza sativa Japonica Group]	-	-	-	-	1.16203	2	0	3.06838	0	0	2	1.06294	0	1	1.03926	0	2.20933	0	0	0.898107	0	0
Niben101Scf00056g04001	GO:0003824;GO:0005524;GO:0006003;GO:0030246;GO:2001070;	K01103	IPR003094;IPR013783;IPR013784;	gb|KEH34332.1|	fructose-6-phosphate-2-kinase/fructose-2, 6-bisphosphatase [Medicago truncatula]	GO:0006003//fructose 2,6-bisphosphate metabolic process;	-	GO:0003824//catalytic activity;GO:0005524//ATP binding;GO:0030246//carbohydrate binding;GO:2001070//starch binding;	ko00051(Fructose and mannose metabolism)	40.3915	38.8488	41	73.7874	67.0809	77.3266	94.5726	92.4941	55.6826	71	61	72.0461	74	73.4441	83.869	48.4002	52.6747	43
Niben101Scf00056g04002	GO:0003824;GO:0003873;GO:0005524;GO:0006000;GO:0006003;	K01103	IPR003094;IPR027417;	sp|Q9MB58|F26_ARATH	6-phosphofructo-2-kinase/fructose-2,6-bisphosphatase	GO:0006000//fructose metabolic process;GO:0006003//fructose 2,6-bisphosphate metabolic process;	-	GO:0003824//catalytic activity;GO:0003873//6-phosphofructo-2-kinase activity;GO:0005524//ATP binding;	ko00051(Fructose and mannose metabolism)	20.7852	15.2678	18	41	32.537	34	36.722	38.8661	24.6746	34.7653	17	43.5803	28.6741	21	28.06	22.3603	47.5006	33.2563
Niben101Scf00056g04010	GO:0005515;GO:0008270;	-	IPR013083;	sp|Q08CG8|RNF44_DANRE	RING finger protein 44	-	-	GO:0005515//protein binding;GO:0008270//zinc ion binding;	-	26.5926	33.2158	24.2304	9	21.2587	24.9742	36	35.3348	25.1554	235.294	262.933	257.736	54.7845	41	57	154.551	128	139.328
Niben101Scf00056g06003	-	-	-	gb|KEH34353.1|	acyl-CoA N-acyltransferase (NAT) superfamily protein, putative [Medicago truncatula]	-	-	-	-	7.27481	0.93168	2.20933	3.11778	9.35333	17.9621	3	8	3.4861	0	0	1.02279	18.0314	46.3538	45	1.06294	0.924971	0
Niben101Scf00056g07001	GO:0005385;GO:0016020;GO:0016021;GO:0030001;GO:0046873;GO:0055085;GO:0071577;	K14709	IPR003689;	sp|Q6L8F9|ZIP6_ORYSJ	Zinc transporter 6	GO:0030001//metal ion transport;GO:0055085//transmembrane transport;GO:0071577//zinc ion transmembrane transport;	GO:0016020//membrane;GO:0016021//integral component of membrane;	GO:0005385//zinc ion transmembrane transporter activity;GO:0046873//metal ion transmembrane transporter activity;	-	4	4.64814	6	4.32024	2.04559	3.79609	13.6954	14	18.0699	11.0996	14	18.7067	17.7019	32.0353	13.5104	33.2563	14.3697	20
Niben101Scf00056g07005	-	-	-	-	Unknown protein	-	-	-	-	17	18.0699	18.4994	7	11.4319	22.3603	38.6633	19.7459	37.4133	11.6754	23	23	48.8055	25	35.642	59.322	27.5217	25.2839
Niben101Scf00056g07009	GO:0005385;GO:0016020;GO:0016021;GO:0030001;GO:0046873;GO:0055085;GO:0071577;	K14709	IPR003689;	sp|Q6L8F9|ZIP6_ORYSJ	Zinc transporter 6	GO:0030001//metal ion transport;GO:0055085//transmembrane transport;GO:0071577//zinc ion transmembrane transport;	GO:0016020//membrane;GO:0016021//integral component of membrane;	GO:0005385//zinc ion transmembrane transporter activity;GO:0046873//metal ion transmembrane transporter activity;	-	0	0	0	0	0	0	0	1.08006	0	0	0	0	0	0	0	0	0	0
Niben101Scf00056g09002	GO:0004842;GO:0005515;GO:0007165;GO:0007250;GO:0008270;GO:0016567;GO:0046330;	-	IPR008974;IPR013083;IPR027138;	sp|Q61382|TRAF4_MOUSE	TNF receptor-associated factor 4	GO:0007165//signal transduction;GO:0007250//activation of NF-kappaB-inducing kinase activity;GO:0016567//protein ubiquitination;GO:0046330//positive regulation of JNK cascade;	-	GO:0004842//ubiquitin-protein transferase activity;GO:0005515//protein binding;GO:0008270//zinc ion binding;	-	1480.76	1205.87	949.023	1163.06	1366	1343.55	1437.4	1282	1678.4	638.201	915.767	800.23	880.253	621.49	749	990	922.655	925
Niben101Scf00057g00011	-	-	IPR024752;	emb|CDY39049.1|	BnaA02g17380D [Brassica napus]	-	-	-	-	51	56.12	50.3107	47.5006	86.2585	62.3556	52.9883	65	57	53.4536	104	69.1238	65.4587	37.9609	71.6376	55	73.3425	70.2978
Niben101Scf00057g00012	-	K19037	-	sp|Q8L9W3|ATL23_ARATH	E3 ubiquitin-protein ligase ATL23	-	-	-	-	7	15	2.32407	13	15.1208	19.4331	2.84707	2.10699	0	18.0699	16.6495	24	0	0	0	6.23556	3.11778	7.18485
Niben101Scf00057g00032	GO:0004672;GO:0004674;GO:0005509;GO:0005524;GO:0006468;GO:0016772;	K13412	IPR011009;IPR011992;	AT1G76040.2	calcium-dependent protein kinase 29 LENGTH=561	GO:0006468//protein phosphorylation;	-	GO:0004672//protein kinase activity;GO:0004674//protein serine/threonine kinase activity;GO:0005509//calcium ion binding;GO:0005524//ATP binding;GO:0016772//transferase activity, transferring phosphorus-containing groups;	ko04626(Plant-pathogen interaction)	422.451	291	165.818	139.671	275	387.644	277.641	670.532	766.973	4905.3	7001.64	6467	933	1849.96	1353	4645.34	3737.28	3783.75
Niben101Scf00057g00033	GO:0016020;GO:0055085;	-	IPR006685;	sp|Q9LH74|MSL5_ARATH	Mechanosensitive ion channel protein 5	GO:0055085//transmembrane transport;	GO:0016020//membrane;	-	-	93.8965	57.1593	88.337	88.0145	97	92	10.4583	88	149.048	25.5698	10.4392	20.0164	104	119.049	124.871	80	72.7481	57.7641
Niben101Scf00057g00034	-	-	IPR006357;IPR023214;	AT5G10460.1	Haloacid dehalogenase-like hydrolase (HAD) superfamily protein LENGTH=306	-	-	-	-	111	120.967	77.7322	43.655	75.8516	122	58.4614	88.7972	136	33.2563	50.3107	48.6053	109.122	88.337	103.282	65	52	58.1017
Niben101Scf00057g00035	GO:0016020;GO:0055085;	-	IPR006685;IPR010920;	sp|F4IME2|MSL8_ARATH	Mechanosensitive ion channel protein 8	GO:0055085//transmembrane transport;	GO:0016020//membrane;	-	-	125.796	114	112.24	47.5157	90.5825	135.104	358.544	180.519	109	6	9.29628	8	123.127	147.282	159.436	6.32097	16	11.6923
Niben101Scf00058g00001	GO:0005488;	-	IPR016024;	gb|AGZ88227.1|	cytokinesis protein, partial [Polypodium glycyrrhiza]	-	-	GO:0005488//binding;	-	757.104	756	785	1031.89	913	833.806	857.1	730.747	860.705	652	934.32	615.106	782	782.562	753.729	866.057	668.244	673.44
Niben101Scf00058g00002	GO:0008152;GO:0008168;	K18162	IPR029063;	sp|B2IAI0|BIOC_XYLF2	Malonyl-[acyl-carrier protein] O-methyltransferase	GO:0008152//metabolic process;	-	GO:0008168//methyltransferase activity;	-	137.608	151.703	114	90.3495	104.522	117	218.244	183.541	246.34	100.808	137.182	95.1993	127	163	257.972	135	145.808	107.393
Niben101Scf00058g01002	-	-	-	emb|CDY37278.1|	BnaA01g24980D [Brassica napus]	-	-	-	-	60.5592	61.8612	46.7667	14.5496	13.4716	18	67	69.7221	97	5.4003	10.2279	9.49023	195.95	232	290.181	29.5991	24	17.6674
Niben101Scf00058g02009	GO:0003824;GO:0005524;GO:0006090;GO:0016301;GO:0016310;GO:0016772;GO:0050242;	K01006	IPR010121;IPR015813;	sp|Q75KR1|PPDK2_ORYSJ	Pyruvate, phosphate dikinase 2	GO:0006090//pyruvate metabolic process;GO:0016310//phosphorylation;	-	GO:0003824//catalytic activity;GO:0005524//ATP binding;GO:0016301//kinase activity;GO:0016772//transferase activity, transferring phosphorus-containing groups;GO:0050242//pyruvate, phosphate dikinase activity;	ko00710(Carbon fixation in photosynthetic organisms);ko00620(Pyruvate metabolism);ko00010(Glycolysis / Gluconeogenesis)	0	0	0	0	0	0	0	0	0	1	0	0	0	0	0	0.898107	0	2
Niben101Scf00058g02016	GO:0003723;GO:0006396;GO:0008173;	-	IPR029028;	gb|KFF73965.1|	RNA methyltransferase [Chryseobacterium sp. P1-3]	GO:0006396//RNA processing;	-	GO:0003723//RNA binding;GO:0008173//RNA methyltransferase activity;	-	154.126	188.694	149	164.203	175.156	171.223	200.577	169.399	139.207	55	56	62.7499	130	137.168	146.259	81.6159	66.3702	60
Niben101Scf00058g02017	-	-	IPR005135;	gb|AES64309.2|	endonuclease/exonuclease/phosphatase family protein [Medicago truncatula]	-	-	-	-	3.11778	2.69432	10	20	6.97221	5	7.56042	32.7294	76.8708	1.05349	4	4.25174	25.8992	23	36.3741	22.3603	11.0467	14.5496
Niben101Scf00058g03001	-	-	IPR002885;IPR011990;	sp|Q9SUD8|PP340_ARATH	Pentatricopeptide repeat-containing protein	-	-	-	-	57.2764	70.2277	66.3702	76	57.3985	66.5979	64	55.0807	53.1057	51.9193	48.8452	43.6489	35.9243	46	57	56.9397	37	45.3625
Niben101Scf00058g03014	GO:0005515;GO:0008270;	-	IPR013083;	sp|Q05A36|MEX3C_MOUSE	RNA-binding E3 ubiquitin-protein ligase MEX3C	-	-	GO:0005515//protein binding;GO:0008270//zinc ion binding;	-	462.47	345.653	568.903	405.311	424.018	405.944	671	650	783.211	350	427.704	380.479	477.358	516.212	537	630.32	459.71	482
Niben101Scf00058g03015	GO:0003824;GO:0004722;GO:0006470;	-	IPR001932;IPR015655;	AT3G06270.1	Protein phosphatase 2C family protein LENGTH=348	GO:0006470//protein dephosphorylation;	-	GO:0003824//catalytic activity;GO:0004722//protein serine/threonine phosphatase activity;	-	183	239.379	144	400.702	519.579	313.177	227.555	189	167.944	1049.84	1411	1128.64	175.156	238.608	184.988	1368.7	971.752	1058
Niben101Scf00058g06004	GO:0004014;GO:0006597;GO:0008295;	K01611	IPR001985;IPR016067;IPR018167;	sp|Q3E9D5|DCAM4_ARATH	S-adenosylmethionine decarboxylase proenzyme 4	GO:0006597//spermine biosynthetic process;GO:0008295//spermidine biosynthetic process;	-	GO:0004014//adenosylmethionine decarboxylase activity;	ko00330(Arginine and proline metabolism);ko00270(Cysteine and methionine metabolism)	1	1.06294	0.924971	0	1.03926	0	0	3.11778	1.03926	0.898107	1	0	4.64814	1	3.24018	2.04559	0.949023	2.10699
Niben101Scf00058g07005	-	-	IPR012474;	sp|Q9LUV4|FRL4A_ARATH	FRIGIDA-like protein 4a	-	-	-	-	531.061	465.588	535.272	344	328	555.453	710	797.084	705.727	348.291	477.233	502	735.551	689.103	930	676.558	578.573	668.322
Niben101Scf00058g08006	-	-	IPR005380;	sp|Q2QWE9|SGS3_ORYSJ	Protein SUPPRESSOR OF GENE SILENCING 3 homolog	-	-	-	-	171.729	249.561	170.824	166.452	160	178.573	198.869	160	181.87	55.9008	70.6986	66.5126	147.575	141.003	139	71	97.6109	58
Niben101Scf00058g09013	-	-	IPR025585;	gb|KEH43885.1|	photosystem II Pbs27 protein [Medicago truncatula]	-	-	-	-	145	177.713	37.2672	23.198	65.4733	138.221	61.9694	114	183	426.467	618	385.581	228.083	261.93	301.299	375	387.971	321.89
Niben101Scf00058g09014	GO:0000105;GO:0004424;	K01693	IPR000807;	AT3G22425.2	imidazoleglycerol-phosphate dehydratase LENGTH=270	GO:0000105//histidine biosynthetic process;	-	GO:0004424//imidazoleglycerol-phosphate dehydratase activity;	ko00340(Histidine metabolism)	342	295	327.694	142	239.773	342.635	375.813	383.472	522	123.3	101.747	142	311.778	313.044	313.725	190.184	129.907	132.92
Niben101Scf00058g09015	GO:0005515;GO:0008270;	-	IPR013083;IPR016181;	AT1G05380.1	Acyl-CoA N-acyltransferase with RING/FYVE/PHD-type zinc finger protein LENGTH=1138	-	-	GO:0005515//protein binding;GO:0008270//zinc ion binding;	-	586.797	561	584.614	760.326	731	546.65	672.673	755.591	645.38	456.235	487.672	614	552	582.179	570	990.415	793.687	794.332
Niben101Scf00058g09016	GO:0004672;GO:0004674;GO:0005524;GO:0006468;GO:0016772;	K08867	IPR011009;	sp|Q802A6|STK4_SQUAC	Serine/threonine-protein kinase 3/4	GO:0006468//protein phosphorylation;	-	GO:0004672//protein kinase activity;GO:0004674//protein serine/threonine kinase activity;GO:0005524//ATP binding;GO:0016772//transferase activity, transferring phosphorus-containing groups;	-	971.001	822.054	807.504	383.492	425	419	772.753	871	1086.54	155.464	143.302	104.296	1408	1337.17	1234.84	202	179.792	149.069
Niben101Scf00059g00006	-	K01728	IPR011050;IPR018082;	sp|P40972|PLY_TOBAC	Pectate lyase	-	-	-	ko00040(Pentose and glucuronate interconversions)	202	248.414	92.0513	52.1962	114.831	134	128.615	113.771	107	55.0807	45.6523	59.6519	78.9837	54.0415	55.6826	46	25	30.2129
Niben101Scf00059g00007	GO:0000145;GO:0006887;	K07195	IPR004140;IPR016159;	AT3G09520.1	exocyst subunit exo70 family protein H4 LENGTH=628	GO:0006887//exocytosis;	GO:0000145//exocyst;	-	-	24.9742	32	34.2956	78.2611	80.6406	56.12	24.9422	28.7394	27	219	180.115	261	28.0816	23.5242	22.7765	598.385	504	470.88
Niben101Scf00059g01004	GO:0000145;GO:0006887;	K07195	IPR004140;IPR016159;	AT3G09520.1	exocyst subunit exo70 family protein H4 LENGTH=628	GO:0006887//exocytosis;	GO:0000145//exocyst;	-	-	8.08296	23	25	134.796	138	90.725	17.3875	4.74511	5.26747	387	292.307	192.394	31	36.3741	11.1802	769.952	684.872	656.812
Niben101Scf00059g01005	GO:0000145;GO:0006887;	K07195	IPR004140;IPR016159;	AT3G09520.1	exocyst subunit exo70 family protein H4 LENGTH=628	GO:0006887//exocytosis;	GO:0000145//exocyst;	-	-	2.84707	17.9094	17	201.958	170.195	76	24.9422	5.59008	5.52333	458.313	459.353	225.425	27	34	32.537	969	992.575	786.527
Niben101Scf00059g02005	GO:0000145;GO:0006887;	K07195	IPR004140;IPR016159;	AT3G09520.1	exocyst subunit exo70 family protein H4 LENGTH=628	GO:0006887//exocytosis;	GO:0000145//exocyst;	-	-	0.93168	4.41866	4.15704	24.9422	14.3697	12	4	0	0	57.2432	48.0712	19.9295	2.10699	1	2.12587	71.2227	64	51.963
Niben101Scf00059g02006	GO:0000145;GO:0006887;	K07195	IPR004140;	AT2G39380.1	exocyst subunit exo70 family protein H2 LENGTH=637	GO:0006887//exocytosis;	GO:0000145//exocyst;	-	-	0	0	0	1.02279	0.949023	0	0	1.06294	0	4	2.07852	0	0	0	0	7.18485	9	3
Niben101Scf00059g02013	GO:0003824;GO:0050662;	K08678	IPR001509;IPR016040;	AT3G53520.4	UDP-glucuronic acid decarboxylase 1 LENGTH=458	-	-	GO:0003824//catalytic activity;GO:0050662//obsolete coenzyme binding;	ko00520(Amino sugar and nucleotide sugar metabolism)	662.209	357.964	278	189.145	238.51	543.495	362.701	398.036	465.219	184	268	183.601	611	747.401	767.094	351.138	303.406	281
Niben101Scf00059g03004	GO:0006364;GO:0032040;	K14567	IPR006709;	sp|Q640M1|UT14A_MOUSE	U3 small nucleolar RNA-associated protein 14 homolog A	GO:0006364//rRNA processing;	GO:0032040//small-subunit processome;	-	ko03008(Ribosome biogenesis in eukaryotes)	30.1385	37.7205	33	36	75.5323	40	73.4441	18.4103	13.2863	26.3374	33	61.6502	9.24971	13	11.4319	17.7019	20.9886	15.5889
Niben101Scf00059g03006	-	-	-	gb|KEH24007.1|	copper chaperone [Medicago truncatula]	-	-	-	-	0	2.84707	1.05349	0	0	2.77491	0	0	0	0	1.03926	0	0.898107	3	2	0	0	0
Niben101Scf00059g03008	-	-	-	-	Unknown protein	-	-	-	-	0	0	0	0	0	0	0	0	0	0	2.16012	3.06838	0	0	0	0	0	0
Niben101Scf00059g04016	-	-	IPR011990;	AT3G53560.1	Tetratricopeptide repeat (TPR)-like superfamily protein LENGTH=340	-	-	-	-	152	195.222	169	143.648	199.445	148.048	223.341	147	165.818	86.0223	194	213.048	114.597	152.444	141.339	133.025	100.588	126
Niben101Scf00059g04019	GO:0005737;GO:0008837;GO:0009089;	K01778	IPR001653;	AT3G53580.1	diaminopimelate epimerase family protein LENGTH=362	GO:0009089//lysine biosynthetic process via diaminopimelate;	GO:0005737//cytoplasm;	GO:0008837//diaminopimelate epimerase activity;	ko00470(D-Amino acid metabolism);ko00300(Lysine biosynthesis)	857	925.816	752.001	537	733.717	757.456	1084.78	1077.71	1207.62	282.006	322	342	1131.82	795	951.533	329.339	228.714	286.551
Niben101Scf00059g04020	-	-	IPR022212;IPR025486;	gb|ABF95303.1|	expressed protein [Oryza sativa Japonica Group]	-	-	-	-	256.697	373.094	122.143	279	289	331.18	118	152.288	182.057	370.119	304.46	469	165.818	129.496	162	913.509	602.797	716.928
Niben101Scf00059g04022	-	-	-	-	Unknown protein	-	-	-	-	8.64048	7.15955	4.74511	12.6419	12	10.6294	12.9496	17	18.7067	5.59008	11.0467	8.31407	2.07852	8.98107	5	13	6.97221	6
Niben101Scf00059g04024	-	-	-	-	Unknown protein	-	-	-	-	71	70.6696	53.1057	70.6986	69.6304	83.1407	84.422	81	102	47.6434	46	72.364	49.094	45.5531	33.7118	33	51.0209	24.9742
Niben101Scf00059g04025	GO:0000166;GO:0003735;GO:0005622;GO:0005840;GO:0006412;	K02893	IPR005633;IPR013025;	sp|Q07761|RL23A_TOBAC	60S ribosomal protein L23a	GO:0006412//translation;	GO:0005622//intracellular anatomical structure;GO:0005840//ribosome;	GO:0000166//nucleotide binding;GO:0003735//structural constituent of ribosome;	ko03010(Ribosome)	206	285	264.944	245	332.658	337.522	293.248	280.23	273	302.936	496.709	549	302.424	205.901	256.282	435.45	427.136	370.918
Niben101Scf00061g00002	GO:0003677;GO:0003700;GO:0005634;GO:0006355;GO:0046983;	K09264	IPR002100;IPR002487;	sp|Q6EU39|MADS6_ORYSJ	MADS-box transcription factor 6	GO:0006355//regulation of transcription, DNA-templated;	GO:0005634//nucleus;	GO:0003677//DNA binding;GO:0003700//DNA-binding transcription factor activity;GO:0046983//protein dimerization activity;	-	22.1234	41	39.3286	133.196	184	98.7296	82.9195	24.3026	12.4711	558.082	685.256	614	34	46.4814	26	1172.94	910.285	943.328
Niben101Scf00062g00001	GO:0003924;GO:0005525;	K17065	IPR000375;IPR001401;IPR020850;IPR022812;IPR027417;	sp|Q8S944|DRP3A_ARATH	Dynamin-related protein 3A	-	-	GO:0003924//GTPase activity;GO:0005525//GTP binding;	-	641.81	507.159	518.59	513.717	574	566	649.577	520	530.309	828.462	908.215	1237.86	448	457.062	443.986	1089	1043.42	961.493
Niben101Scf00062g00005	GO:0004672;GO:0005524;GO:0006468;GO:0016772;	-	IPR011009;	sp|Q9FN94|RLK7_ARATH	Receptor-like protein kinase	GO:0006468//protein phosphorylation;	-	GO:0004672//protein kinase activity;GO:0005524//ATP binding;GO:0016772//transferase activity, transferring phosphorus-containing groups;	-	0	0	0	3.79609	0	0	2.12587	0	0	0	0.93168	0	0	0	0	0	0	0
Niben101Scf00062g01019	GO:0003676;GO:0008270;	-	IPR003604;	sp|Q96CK0|ZN653_HUMAN	Zinc finger protein 653	-	-	GO:0003676//nucleic acid binding;GO:0008270//zinc ion binding;	-	3.69988	7	2.07852	2.79504	0	8.31407	5.1963	1.79621	2	20	18.5926	18	4.32024	4.09117	11.3883	71.6376	43	32.951
Niben101Scf00062g01023	GO:0004491;GO:0008152;GO:0016491;GO:0055114;	K00140	IPR010061;IPR016161;	sp|B7H597|IOLA_BACC4	Methylmalonate semialdehyde dehydrogenase [acylating]	GO:0008152//metabolic process;GO:0055114//obsolete oxidation-reduction process;	-	GO:0004491//methylmalonate-semialdehyde dehydrogenase (acylating) activity;GO:0016491//oxidoreductase activity;	ko00640(Propanoate metabolism);ko00562(Inositol phosphate metabolism);ko00410(beta-Alanine metabolism);ko00280(Valine, leucine and isoleucine degradation)	21.5546	20	9	8.13424	4	25.9214	30.6838	17.0824	32.6583	19	25.5104	10.1747	28	16.6281	25.1554	27.6166	13.5104	23.903
Niben101Scf00062g01025	-	-	IPR029062;	sp|B9DUB2|GUAA_STRU0	GMP synthase [glutamine-hydrolyzing]	-	-	-	-	46.5021	37.9258	55	77.5943	40.6987	55	89.3763	80.1245	163.49	58.1985	68.5911	91.6069	80	41	96.4489	248	220.332	216.832
Niben101Scf00062g01026	GO:0004491;GO:0008152;GO:0016491;GO:0016620;GO:0055114;	K00140	IPR010061;IPR016161;	sp|Q802W2|A9A1B_DANRE	Aldehyde dehydrogenase family 9 member A1-B	GO:0008152//metabolic process;GO:0055114//obsolete oxidation-reduction process;	-	GO:0004491//methylmalonate-semialdehyde dehydrogenase (acylating) activity;GO:0016491//oxidoreductase activity;GO:0016620//oxidoreductase activity, acting on the aldehyde or oxo group of donors, NAD or NADP as acceptor;	ko00640(Propanoate metabolism);ko00562(Inositol phosphate metabolism);ko00410(beta-Alanine metabolism);ko00280(Valine, leucine and isoleucine degradation)	374.535	353.493	270.207	250.461	207.463	373	373	528.726	477	663.157	485.826	603.578	544.657	464	473.006	677.079	552	674.479
Niben101Scf00062g01027	GO:0004491;GO:0055114;	K00140	IPR010061;	sp|P28810|MMSA_PSEAE	Methylmalonate-semialdehyde dehydrogenase [acylating]	GO:0055114//obsolete oxidation-reduction process;	-	GO:0004491//methylmalonate-semialdehyde dehydrogenase (acylating) activity;	ko00640(Propanoate metabolism);ko00562(Inositol phosphate metabolism);ko00410(beta-Alanine metabolism);ko00280(Valine, leucine and isoleucine degradation)	4.64814	11	5.4003	2.04559	5.69414	11.5884	13	9.56642	13.8746	5	9.35333	11.1802	12.1513	5.1963	20.7852	9.87918	14	3
Niben101Scf00063g00002	-	-	-	tpg|DAA41320.1|	TPA: hypothetical protein ZEAMMB73_745179 [Zea mays]	-	-	-	-	1.06294	0	0	1.03926	0	1.10467	0	0	0	1	0	0	0	0	3.06838	0	0	0
Niben101Scf00063g00013	-	-	-	-	Unknown protein	-	-	-	-	4.15704	0	8	6	3.4861	16	5.4003	7.15955	7.59218	5.26747	7	0	5.54982	6	6.23556	1.86336	5.52333	2.07852
Niben101Scf00063g00016	-	-	-	sp|Q9BY12|SCAPE_HUMAN	S phase cyclin A-associated protein in the endoplasmic reticulum	-	-	-	-	539.012	466.919	542.55	349	391.16	321.89	633	472.863	438.821	315.934	463.51	306.581	466.117	490	568	654.225	502	525.989
Niben101Scf00063g01016	-	-	IPR012417;	gb|KEH25033.1|	plant calmodulin-binding-like protein [Medicago truncatula]	-	-	-	-	84.18	48.4473	85.0592	41.5704	43.6489	66.4599	117	84	104.583	82	68.0438	110.462	100.596	90.6005	112	87.1607	68.4478	76
Niben101Scf00063g01018	GO:0004499;GO:0050660;GO:0050661;GO:0055114;	-	IPR020946;	AT1G63340.1	Flavin-containing monooxygenase family protein LENGTH=424	GO:0055114//obsolete oxidation-reduction process;	-	GO:0004499//N,N-dimethylaniline monooxygenase activity;GO:0050660//flavin adenine dinucleotide binding;GO:0050661//NADP binding;	-	8	20.9166	12	34.5619	52.1624	36.0629	15.8024	22	12.7552	68.4478	85	128.868	10.2485	11.0467	7.27481	40.5311	20.6565	18
Niben101Scf00063g01019	-	-	IPR011598;	sp|Q9R210|TFEB_MOUSE	Transcription factor EB	-	-	-	-	35	36.1398	66.5979	6	3.11778	8.38512	50.8146	55.0807	33.2563	0	0	3	261.458	267	273.255	6.13676	11.3883	21.0699
Niben101Scf00063g02003	-	-	IPR008581;	emb|CDY16121.1|	BnaC08g40020D [Brassica napus]	-	-	-	-	375.173	336.72	370.02	753	711	684.438	407	382.341	685.271	738.34	892.31	533	535.719	511.509	636	1303.23	1066.77	1105.77
Niben101Scf00063g02005	-	-	-	-	Unknown protein	-	-	-	-	7.56042	17.3875	1.89805	3.16048	9	7.44055	12.0246	4	5.1963	4.6584	7.73266	9.35333	3.11778	5.38864	8	7	6.97221	6
Niben101Scf00063g02006	GO:0003684;GO:0004519;GO:0005634;GO:0006281;	K10849	IPR004579;IPR010994;IPR011335;	sp|Q9MA98|ERCC1_ARATH	DNA excision repair protein ERCC-1	GO:0006281//DNA repair;	GO:0005634//nucleus;	GO:0003684//damaged DNA binding;GO:0004519//endonuclease activity;	ko03420(Nucleotide excision repair)	49	72.7481	37.2672	88.3732	115.358	97.6904	49.3959	70	57	146.416	160	106.926	84.8918	53.1453	79.0121	88	81.846	79.5475
Niben101Scf00063g02008	-	-	IPR008545;	ref|XP_002514710.1|	conserved hypothetical protein [Ricinus communis] gb|EEF47816.1| conserved hypothetical protein [Ricinus communis]	-	-	-	-	4	1	2.32407	0	0	3.06838	2.84707	8.42796	0	39.3286	49.9484	34	3.11778	5.59008	2.20933	59.2378	17.6674	38.6186
Niben101Scf00063g02016	GO:0006412;	K02989	IPR000235;IPR023798;	sp|B0R8D0|RS7_HALS3	30S ribosomal protein S7	GO:0006412//translation;	-	-	ko03010(Ribosome)	0	0	1.06294	1.84994	2	1.03926	0	0	0	0	0.898107	2	0	0	1	0	0	0
Niben101Scf00063g03007	GO:0003723;GO:0003746;GO:0006452;GO:0043022;GO:0045901;GO:0045905;	K03263	IPR001884;	sp|P69039|IF5A1_NICPL	Eukaryotic translation initiation factor 5A-1	GO:0006452//translational frameshifting;GO:0045901//positive regulation of translational elongation;GO:0045905//positive regulation of translational termination;	-	GO:0003723//RNA binding;GO:0003746//translation elongation factor activity;GO:0043022//ribosome binding;	-	1782.93	1241.91	1350	807.398	1179	1659	2441.43	2053	2382.61	1316.33	1450.11	2004.8	2032	1781.48	1894.34	1129	1074.59	1032.3
Niben101Scf00063g03008	-	-	IPR007493;	AT2G03350.1	Protein of unknown function, DUF538 LENGTH=179	-	-	-	-	70	52.9229	9.20513	9.49023	28.4444	74	7.44055	24.0492	54	0	0.93168	5.52333	12.4711	8.31407	8.08296	3	0	1.16203
Niben101Scf00063g04006	-	-	-	emb|CDY23069.1|	BnaC07g31180D [Brassica napus]	-	-	-	-	6.4748	4	3.11778	2.79504	9.94199	2.07852	2.07852	1.79621	4	41	83.6665	56	2.16012	0	1.89805	74.7981	57	65.902
Niben101Scf00063g04014	GO:0004672;GO:0004674;GO:0005524;GO:0006468;GO:0016772;	-	IPR011009;	sp|A2Y4B6|CDKD1_ORYSI	Cyclin-dependent kinase D-1	GO:0006468//protein phosphorylation;	-	GO:0004672//protein kinase activity;GO:0004674//protein serine/threonine kinase activity;GO:0005524//ATP binding;GO:0016772//transferase activity, transferring phosphorus-containing groups;	-	65.5618	56	77	39.5092	31	62.6435	39.8889	73.0747	106.403	21	13.8182	17.5744	97	128.868	105.28	20.9886	21.8244	45.7274
Niben101Scf00063g04015	GO:0005515;GO:0005884;GO:0045010;	K02184	IPR000008;IPR015425;IPR027643;IPR029021;	sp|Q9FLQ7|FH20_ARATH	Formin-like protein 20	GO:0045010//actin nucleation;	GO:0005884//actin filament;	GO:0005515//protein binding;	-	414.723	487.768	411	1229.82	1036.89	943	526.904	366.15	522.507	1099.54	1311.55	1137.9	475	429	562.425	646	635.075	663.792
Niben101Scf00063g05003	GO:0004672;GO:0004674;GO:0005515;GO:0005524;GO:0006468;GO:0016772;	K07198	IPR009060;IPR011009;IPR028375;	sp|Q9LGV5|CIPK1_ORYSJ	CBL-interacting protein kinase 1	GO:0006468//protein phosphorylation;	-	GO:0004672//protein kinase activity;GO:0004674//protein serine/threonine kinase activity;GO:0005515//protein binding;GO:0005524//ATP binding;GO:0016772//transferase activity, transferring phosphorus-containing groups;	-	728.574	665.008	817.897	609.006	555.03	710	1314	1234.08	1083	491.427	464.348	466.919	776.426	723	941.76	599.381	642	548.729
Niben101Scf00063g05004	GO:0004176;GO:0005515;GO:0006508;GO:0008270;	-	IPR003111;IPR011990;IPR013083;IPR015947;	gb|ERE90042.1|	LON peptidase domain and RING finger protein 1 [Cricetulus griseus]	GO:0006508//proteolysis;	-	GO:0004176//ATP-dependent peptidase activity;GO:0005515//protein binding;GO:0008270//zinc ion binding;	-	270.754	193	204.131	271.04	309.381	258.106	293	265.734	246.042	247	243.187	236.647	360.121	346.073	427.136	440.072	467	451
Niben101Scf00063g05010	GO:0004672;GO:0004674;GO:0005524;GO:0006468;GO:0016772;	-	IPR011009;IPR013320;IPR024788;	sp|Q9LIG2|RLK6_ARATH	Receptor-like protein kinase	GO:0006468//protein phosphorylation;	-	GO:0004672//protein kinase activity;GO:0004674//protein serine/threonine kinase activity;GO:0005524//ATP binding;GO:0016772//transferase activity, transferring phosphorus-containing groups;	-	1.06294	1.84994	2	15.5889	12.1118	1.10467	3.11778	4.15704	0	4	13	6.97221	0	1.08006	1.02279	1.89805	5.26747	6
Niben101Scf00063g05012	GO:0016021;GO:0016758;	K08238	IPR008630;	sp|Q9LZJ3|XXT1_ARATH	Xyloglucan 6-xylosyltransferase 1	-	GO:0016021//integral component of membrane;	GO:0016758//hexosyltransferase activity;	-	406.35	417.62	295	422	711.165	437	353.18	400.935	437.499	187.522	232	136.056	385.713	434	512.355	279.504	207.677	276.443
Niben101Scf00063g06001	-	-	IPR004263;	sp|Q7XJ98|KATAM_ARATH	Xyloglucan galactosyltransferase KATAMARI1	-	-	-	-	0	0	0	0	0	0	0	0	2.79504	0	0	1.03926	1.79621	0	0	2.32407	1	1.08006
Niben101Scf00063g06007	GO:0008107;GO:0016020;GO:0042546;	K13681	IPR004938;	sp|Q9M5Q1|FUT1_PEA	Galactoside 2-alpha-L-fucosyltransferase	GO:0042546//cell wall biogenesis;	GO:0016020//membrane;	GO:0008107//galactoside 2-alpha-L-fucosyltransferase activity;	-	0	0	0	0	0	0	0	0	0	0	0	2.04559	0	0	0	0	0.924971	0
Niben101Scf00063g06009	-	K12127	IPR011006;	AT4G31920.1	response regulator 10 LENGTH=552	-	-	-	ko04712(Circadian rhythm - plant)	151	142.93	84	282.976	364.114	270.471	115.884	93	102.042	174.819	156	152.771	21.4286	23.198	25.9815	145.496	118.55	114
Niben101Scf00063g06018	-	-	-	-	Unknown protein	-	-	-	-	1	4.25174	0.924971	0	0	0.93168	3.314	0	2.07852	0.898107	0	0	2.32407	1	0	0	0.949023	1.05349
Niben101Scf00063g06032	GO:0006886;GO:0016020;GO:0016192;	K08493	IPR007705;IPR010989;	sp|Q9LVP9|VTI13_ARATH	Vesicle transport v-SNARE 13	GO:0006886//intracellular protein transport;GO:0016192//vesicle-mediated transport;	GO:0016020//membrane;	-	ko04130(SNARE interactions in vesicular transport)	377.251	457.274	447.257	280	339	313.749	446	464.426	383.547	44.6041	60.0492	58	255.104	176.669	257	93.5333	80.1245	76.2219
Niben101Scf00063g06034	-	K20195	IPR004353;	sp|Q86VX9|MON1A_HUMAN	Vacuolar fusion protein MON1 homolog A	-	-	-	-	409.343	377.41	300.84	331.851	421	364.587	332.989	458	405.311	1580.13	1647.06	1003.92	485.334	370.918	463	1260	1258.48	1159
Niben101Scf00063g06035	GO:0008107;GO:0016020;GO:0042546;	K13681	IPR004938;	sp|Q9XI80|FUT6_ARATH	Fucosyltransferase 6	GO:0042546//cell wall biogenesis;	GO:0016020//membrane;	GO:0008107//galactoside 2-alpha-L-fucosyltransferase activity;	-	0	0	0	0	0	1.03926	2.69432	1	0	2.32407	3	3.24018	1.02279	0	1.05349	0	1.06294	1.84994
Niben101Scf00063g06038	GO:0003676;GO:0004527;	-	IPR012337;	gb|AGZ19448.1|	APOLLO [Boechera sp. IPK 66]	-	-	GO:0003676//nucleic acid binding;GO:0004527//exonuclease activity;	-	17	15	17.4305	29	41.0423	37.8433	6.64316	35.8188	15	291.244	139.671	474	42.6096	13.0435	27.6166	343.995	347.113	237.1
Niben101Scf00063g06039	-	-	IPR002885;	sp|O80488|PPR23_ARATH	Pentatricopeptide repeat-containing protein	-	-	-	-	14.7489	9	9.56642	10.1747	4	11.4319	12.1118	17.6746	5.1963	5.1963	4.49053	7	8	3.4861	6	6.48036	1.02279	5.69414
Niben101Scf00063g06040	-	-	IPR013830;	ref|NP_001052354.1|	product [Oryza sativa Japonica Group]	-	-	-	-	108.257	99.7689	82.1015	49.3959	84	105	98.7729	98	151.208	244.447	226.816	174.88	125	155.189	154.47	186	186.027	138.82
Niben101Scf00063g06042	GO:0003824;GO:0005975;GO:0008152;GO:0016857;	K01783	IPR000056;IPR013785;	sp|P74061|RPE_SYNY3	Ribulose-phosphate 3-epimerase	GO:0005975//carbohydrate metabolic process;GO:0008152//metabolic process;	-	GO:0003824//catalytic activity;GO:0016857//racemase and epimerase activity, acting on carbohydrates and derivatives;	ko00710(Carbon fixation in photosynthetic organisms);ko00040(Pentose and glucuronate interconversions);ko00030(Pentose phosphate pathway)	2401	2593.22	1364.41	944.277	1791.99	2940	1501.93	1959.09	2766	527.944	375.467	606.461	2812.24	3532.44	2714.08	356	363	362.555
Niben101Scf00063g07009	-	-	-	AT1G18700.4	DNAJ heat shock N-terminal domain-containing protein LENGTH=715	-	-	-	-	0	0	0	0	0	0	0	0	0	0	0	1	0	0	0	1.05349	0	0
Niben101Scf00063g07011	GO:0003677;GO:0006355;	-	IPR003441;	sp|Q9FLJ2|NC100_ARATH	NAC domain-containing protein 100	GO:0006355//regulation of transcription, DNA-templated;	-	GO:0003677//DNA binding;	-	2.69432	1	12	12.7824	8	2.16012	20.4559	0.949023	4.21398	17	20.1958	25.8992	11	11.4319	10.2485	123.722	93.5333	96.6511
Niben101Scf00063g08002	GO:0006662;GO:0015035;GO:0045454;	-	IPR005746;IPR012336;	sp|O96952|THIO_GEOCY	Thioredoxin	GO:0006662//glycerol ether metabolic process;GO:0045454//cell redox homeostasis;	-	GO:0015035//protein-disulfide reductase activity;	-	104.392	158.024	59	311.44	88.7972	154	83.1407	168.634	96.1059	70.6696	51.963	66.4599	47	40	75.5323	78	131.767	111.484
Niben101Scf00063g08003	-	-	IPR009305;	gb|KEH33297.1|	YGL010w-like protein [Medicago truncatula]	-	-	-	-	1178.57	1602.87	1356.23	1322.98	1246.57	1356	1913	1978.94	1315	4239.23	3787.4	2598.42	864.919	758	1036.36	3621.26	3316	3192.6
Niben101Scf00063g10001	GO:0005576;GO:0009664;	-	IPR007118;	sp|Q9C554|EXPA1_ARATH	Expansin-A1	GO:0009664//plant-type cell wall organization;	GO:0005576//extracellular region;	-	-	16.2685	18	5.4003	20.4559	33.2158	22.1234	2	8.50348	41.6237	1	3.11778	6.52176	18.7793	11.4319	15.5889	2.69432	12	11
Niben101Scf00063g10005	GO:0003677;GO:0046983;	K08910	IPR002100;	sp|Q944S9|MAD16_ORYSJ	MADS-box transcription factor 16	-	-	GO:0003677//DNA binding;GO:0046983//protein dimerization activity;	ko00196(Photosynthesis - antenna proteins)	32.951	32.374	40	323.21	72.671	75.1172	89.3763	42.6096	39.5167	368	382	722.786	57	50.7628	51.1396	247.695	316.048	240
Niben101Scf00063g10008	GO:0009765;GO:0016020;	K08910	IPR022796;IPR023329;	sp|Q9SQL2|CB24_PEA	Chlorophyll a-b binding protein P4, chloroplastic	GO:0009765//photosynthesis, light harvesting;	GO:0016020//membrane;	-	ko00196(Photosynthesis - antenna proteins)	240.069	347.567	232	77	239.379	331	203.051	106.37	193.601	33.7118	30	73.3425	493.934	170	339.838	18.6336	27.6166	16.6281
Niben101Scf00063g10017	-	K11975	-	-	Unknown protein	-	-	-	-	41.9345	38.9099	33.7118	26	17.007	27.7491	20	36.3741	24.2237	8.83732	4.15704	1.03926	3.59243	6	8	13.9444	4	5.4003
Niben101Scf00063g10026	-	K02183	IPR011992;	ref|XP_002531850.1|	calcium ion binding protein, putative [Ricinus communis] gb|EEF30528.1| calcium ion binding protein, putative [Ricinus communis]	-	-	-	ko04626(Plant-pathogen interaction);ko04070(Phosphatidylinositol signaling system);ko04016(MAPK signaling pathway - plant)	1690.87	1819.57	2794.8	4716.16	5649.41	2291.97	4643	941	754.16	2858	3900.1	2964.05	150.895	308.674	447	3537.45	2915.51	2299
Niben101Scf00063g11003	GO:0003677;GO:0006355;	-	IPR003851;	AT3G21270.1	DOF zinc finger protein 2 LENGTH=204	GO:0006355//regulation of transcription, DNA-templated;	-	GO:0003677//DNA binding;	-	333	449.707	342	369.38	277.177	278.064	549.924	476	686.656	230.318	224	151.732	319.566	421.982	429.214	457.274	381.695	391
Niben101Scf00063g12003	-	-	-	gb|KEH33317.1|	transmembrane protein, putative [Medicago truncatula]	-	-	-	-	75	170.07	44.3986	15	27.0207	54.0374	153.548	75.8659	66.5126	6.28675	32	9	81.3424	54	77.7643	30.6838	17.0824	34.7653
Niben101Scf00063g12004	GO:0006629;GO:0016788;	-	IPR013830;	sp|Q9CA68|GDL31_ARATH	GDSL esterase/lipase	GO:0006629//lipid metabolic process;	-	GO:0016788//hydrolase activity, acting on ester bonds;	-	0	0	0	0	1	0	1	0	0	0	0	0	5.31468	1.84994	2	0	0.93168	1.10467
Niben101Scf00063g13002	-	-	IPR002885;IPR011990;	sp|Q9SN85|PP267_ARATH	Pentatricopeptide repeat-containing protein	-	-	-	-	34.5619	25.5698	22.7765	17.9094	21	24.4475	19.4244	37	30.1385	4.6584	6.62799	7.27481	16.6281	10.7773	13	10	0	3
Niben101Scf00063g13003	-	-	IPR003035;	AT1G18790.1	RWP-RK domain-containing protein LENGTH=269	-	-	-	-	0	0	0	0	0	0	0	0	0	1.16203	0	0	0	0	0	1	0	0
Niben101Scf00063g13004	GO:0005507;GO:0009308;GO:0048038;	-	IPR015801;IPR021602;	sp|Q9LQ02|NRPD1_ARATH	DNA-directed RNA polymerase IV subunit 1	GO:0009308//amine metabolic process;	-	GO:0005507//copper ion binding;GO:0048038//quinone binding;	-	175	154	238.217	158	219.252	196.376	168.926	181.201	137	139.244	174.819	222	110.161	105.28	155.758	160.046	156.928	144.595
Niben101Scf00063g13005	GO:0003824;GO:0005975;GO:0006108;GO:0016491;GO:0016615;GO:0016616;GO:0030060;GO:0044262;GO:0055114;	K00026	IPR001557;	AT3G47520.1	malate dehydrogenase LENGTH=403	GO:0005975//carbohydrate metabolic process;GO:0006108//malate metabolic process;GO:0044262//cellular carbohydrate metabolic process;GO:0055114//obsolete oxidation-reduction process;	-	GO:0003824//catalytic activity;GO:0016491//oxidoreductase activity;GO:0016615//malate dehydrogenase activity;GO:0016616//oxidoreductase activity, acting on the CH-OH group of donors, NAD or NADP as acceptor;GO:0030060//L-malate dehydrogenase activity;	ko00710(Carbon fixation in photosynthetic organisms);ko00630(Glyoxylate and dicarboxylate metabolism);ko00620(Pyruvate metabolism);ko00270(Cysteine and methionine metabolism);ko00020(Citrate cycle (TCA cycle))	415.077	555	530.405	2190.33	1811	1593.18	285.094	362.33	357.505	1046.53	1360.63	879	385	418.332	502	705.279	574.809	605.476
Niben101Scf00063g13014	GO:0008152;GO:0015979;GO:0015995;GO:0016491;GO:0016628;GO:0045550;GO:0051188;GO:0055114;	K10960	IPR003042;IPR011777;IPR016040;IPR023753;	sp|Q55087|CHLP_SYNY3	Geranylgeranyl diphosphate reductase	GO:0008152//metabolic process;GO:0015979//photosynthesis;GO:0015995//chlorophyll biosynthetic process;GO:0051188//obsolete cofactor biosynthetic process;GO:0055114//obsolete oxidation-reduction process;	-	GO:0016491//oxidoreductase activity;GO:0016628//oxidoreductase activity, acting on the CH-CH group of donors, NAD or NADP as acceptor;GO:0045550//geranylgeranyl reductase activity;	ko00900(Terpenoid backbone biosynthesis);ko00860(Porphyrin metabolism)	4251.86	2450.57	568.475	746.327	1769	5674	584.503	1188	2652.63	459.234	339.75	897.577	2593	2831.66	2026.61	246	191.224	188.199
Niben101Scf00063g14001	-	-	IPR011016;IPR013083;IPR022143;	AT3G47550.3	RING/FYVE/PHD zinc finger superfamily protein LENGTH=288	-	-	-	-	669	1045.5	614.698	1906.59	2324.01	1402	811.019	737.202	468	3733.02	2959.95	2541.83	437.528	320.092	312.541	2333	2137	2369.39
Niben101Scf00063g14005	-	-	IPR005174;	sp|Q3EBY8|FB111_ARATH	F-box protein	-	-	-	-	4.62485	0	1.03926	3.72672	2.20933	3.11778	0	0	0	6	6.97221	7	0	1.02279	0	1.05349	3	1.06294
Niben101Scf00063g14006	-	-	IPR004263;	AT1G74680.1	Exostosin family protein LENGTH=461	-	-	-	-	158.965	212	117	320.722	408	322.938	152.396	124.322	150.65	329	359.272	300.615	86	102.887	103.416	261.806	195.381	190.184
Niben101Scf00063g14011	-	-	IPR006456;	sp|Q9SB61|ZHD2_ARATH	Zinc-finger homeodomain protein 2	-	-	-	-	0	1.05349	0	0	0	1	0	0	0	3.11778	0	11.6754	0	0	0	5	11.8807	9.20513
Niben101Scf00063t08001	-	-	-	-	-	-	-	-	-	0	0	0	2.07852	0	1	1	0	0	1.08006	0	0	0	0	0	0	1	0
Niben101Scf00063t13008	-	-	-	-	-	-	-	-	-	0	0	1.08006	0	0	1.05349	0	0	0	0	0	0.93168	0	1.03926	2.07852	0	1	1
Niben101Scf00064g00018	-	-	-	-	Unknown protein	-	-	-	-	55.2726	61.0481	25	24.9422	42.8573	38.6633	6.23556	22.8637	8.08296	61	33	12.7824	4	2.16012	7.15955	4.74511	7.37446	3
Niben101Scf00064g00021	-	K13348	IPR007248;	AT4G33905.1	Peroxisomal membrane 22 kDa (Mpv17/PMP22) family protein LENGTH=261	-	-	-	ko04146(Peroxisome)	39.4919	51.1921	39	24	59.2638	39	101.526	49.094	16.1334	8.42796	12	7.44055	25.8992	25	19.7459	0.93168	18.7793	7.27481
Niben101Scf00064g01004	-	-	-	sp|A4FVI0|ZSWM7_DANRE	Zinc finger SWIM domain-containing protein 7	-	-	-	-	34.7749	31.3177	29.4979	20	24.4475	24.9742	37	29.0993	25.1554	14.3606	14.5496	12.4711	18.8602	31	29	9.29628	11	5.4003
Niben101Scf00065g00004	GO:0006629;GO:0016788;	-	IPR013830;	sp|Q9FHW9|GDL90_ARATH	GDSL esterase/lipase	GO:0006629//lipid metabolic process;	-	GO:0016788//hydrolase activity, acting on ester bonds;	-	0	0	0	0	0	0	0	1	0	0	0	0	0	1.05349	0	0	0	0
Niben101Scf00066g00001	-	-	-	-	Unknown protein	-	-	-	-	37	38.3471	29	17.281	26.5926	22.7765	54.7817	34	43.5803	13.8746	24	23.903	28.8821	37.5586	36.3741	46.7667	19.7584	27
Niben101Scf00066g00002	GO:0005507;GO:0016491;GO:0046274;GO:0048046;GO:0052716;GO:0055114;	K05909	IPR017761;	sp|O81081|LAC2_ARATH	Laccase-2	GO:0046274//lignin catabolic process;GO:0055114//obsolete oxidation-reduction process;	GO:0048046//apoplast;	GO:0005507//copper ion binding;GO:0016491//oxidoreductase activity;GO:0052716//hydroquinone:oxygen oxidoreductase activity;	-	19	54.2097	28.6741	14	46.7667	28.8821	54.1286	8.31407	23.903	8.08296	3	1	17.4305	30	7.56042	0	0	0
Niben101Scf00066g00012	-	-	IPR012552;	ref|NP_001078298.1|	protein ROTUNDIFOLIA like 7 [Arabidopsis thaliana] tpg|DAA02279.1| TPA_exp: DVL8 [Arabidopsis thaliana] gb|AEE79395.1| protein rotundifolia like 7 [Arabidopsis thaliana]	-	-	-	-	17.6674	15.5889	2.69432	9	11	18.5926	4	10.8006	0	3.79609	16.8559	7	0	0.924971	6	9.35333	13.9752	15.4653
Niben101Scf00066g01002	-	-	-	ref|NP_001051735.1|	product [Oryza sativa Japonica Group]	-	-	-	-	0	0	4.74511	23.1769	6	1.06294	2.77491	0	0	11.1802	22.0933	17.6674	12.4711	14.3697	32	32	47.6434	34
Niben101Scf00066g02006	-	-	IPR005202;	AT2G29060.1	GRAS family transcription factor LENGTH=694	-	-	-	-	1142	1228.4	599.07	716.928	1625.4	1940.3	643.943	853	973	605.42	376	479.547	1111.78	952.819	1039.8	911	918.376	797.325
Niben101Scf00066g02010	GO:0008152;GO:0016787;	K07025	IPR006439;IPR010237;IPR023214;	AT5G59480.1	Haloacid dehalogenase-like hydrolase (HAD) superfamily protein LENGTH=282	GO:0008152//metabolic process;	-	GO:0016787//hydrolase activity;	-	18	23	15.1065	61	44.2824	37.8433	21.8275	20.0164	27	551.663	260.842	447	42.6096	35.4038	47.5006	518.59	615.241	483.181
Niben101Scf00066g02012	GO:0003677;GO:0003682;	-	IPR009057;	sp|Q6R0E3|TRP5_ARATH	Telomere repeat-binding protein 5	-	-	GO:0003677//DNA binding;GO:0003682//chromatin binding;	-	148.543	95	143.496	247.892	223	170.439	197.516	165.7	196.42	461.431	475.099	409	150	167.333	145	503.308	449.006	429.907
Niben101Scf00066g05001	-	-	IPR029008;	AT5G59410.1	Rab5-interacting family protein LENGTH=130	-	-	-	-	78.4312	66.5126	62.3556	48.4978	41	69	101.097	64	79.9244	24.547	33.2158	24.2304	52	55.2726	58.2732	53	41.5704	26.087
Niben101Scf00066g05007	-	-	IPR029008;	AT5G59410.1	Rab5-interacting family protein LENGTH=130	-	-	-	-	17	18.361	7.15955	13.2863	15.8024	27	17.007	9.24971	11	3.11778	7.45344	9.94199	13.5104	18.7067	10.7773	6	10	3.4861
Niben101Scf00067g00005	-	-	IPR002885;IPR011990;	sp|Q9LFC5|PP360_ARATH	Pentatricopeptide repeat-containing protein	-	-	-	-	85.0973	82	71.7089	47.5157	68.4892	90.4156	77.9444	78.1353	113	59	80.1804	114	82.0845	88.9829	83.514	119.045	77	102.042
Niben101Scf00067g00006	GO:0003677;GO:0003684;GO:0005524;GO:0006259;GO:0006281;GO:0008094;	K04485	IPR004504;IPR020588;IPR027417;	sp|Q92F42|RADA_LISIN	DNA repair protein RadA homolog	GO:0006259//DNA metabolic process;GO:0006281//DNA repair;	-	GO:0003677//DNA binding;GO:0003684//damaged DNA binding;GO:0005524//ATP binding;GO:0008094//ATP-dependent activity, acting on DNA;	-	35.9243	23	21	45.3194	22	35.642	49.094	27.5217	47.4073	50	76.5313	39.7737	28	39.4919	35.4038	88.3732	64.4341	85.2193
Niben101Scf00067g01004	-	-	-	ref|XP_003627081.1|	Protein CHUP1 [Medicago truncatula] gb|AET01557.1| actin-binding family protein, putative [Medicago truncatula]	-	-	-	-	0	1.05349	0	1.06294	0	1	1.03926	0	0	0	0	0.898107	3	3	3.4861	0	0	0
Niben101Scf00067g01010	GO:0006629;GO:0016788;	-	IPR013830;	sp|Q9LZC5|GDL73_ARATH	GDSL esterase/lipase	GO:0006629//lipid metabolic process;	-	GO:0016788//hydrolase activity, acting on ester bonds;	-	34.4722	81.7452	15.5889	6.23556	18.8602	46	41	39.5092	108	50.7628	64.4359	75.9218	297.086	250	290.181	59.1981	50	59.2378
Niben101Scf00067g02001	GO:0004672;GO:0004674;GO:0005524;GO:0006468;GO:0016772;	K08287	IPR011009;	AT4G32660.1	Protein kinase superfamily protein LENGTH=400	GO:0006468//protein phosphorylation;	-	GO:0004672//protein kinase activity;GO:0004674//protein serine/threonine kinase activity;GO:0005524//ATP binding;GO:0016772//transferase activity, transferring phosphorus-containing groups;	-	137.12	122	85.3247	76.7094	62.6355	117.991	132	129.678	117.471	60	109.122	69.876	113.781	125.75	181.87	73.6448	77	66
Niben101Scf00067g02002	GO:0005737;GO:0008837;GO:0009089;	K01778	IPR001653;	AT3G53580.1	diaminopimelate epimerase family protein LENGTH=362	GO:0009089//lysine biosynthetic process via diaminopimelate;	GO:0005737//cytoplasm;	GO:0008837//diaminopimelate epimerase activity;	ko00470(D-Amino acid metabolism);ko00300(Lysine biosynthesis)	281.678	296.916	270	224.48	264.597	332.504	377.251	365.819	307.153	227	377	310.263	287	264.615	271.04	211.632	211.752	238
Niben101Scf00067g02003	GO:0003676;GO:0003723;GO:0006139;GO:0008408;	K18740	IPR004087;IPR012337;	AT2G25910.2	3'-5' exonuclease domain-containing protein / K homology domain-containing protein / KH domain-containing protein LENGTH=342	GO:0006139//nucleobase-containing compound metabolic process;	-	GO:0003676//nucleic acid binding;GO:0003723//RNA binding;GO:0008408//3'-5' exonuclease activity;	-	31.1778	26.0451	12	36	44.1573	53	29.1616	27.6154	22.7765	30.5513	37	45.7062	28.6741	30	24.9422	13.0435	18.7793	16.6281
Niben101Scf00067g02005	-	-	IPR008586;	AT2G04220.1	Plant protein of unknown function (DUF868) LENGTH=307	-	-	-	-	0	0	0	2	0	0	0	0	0	0	0	0	0	0	0	2.32407	0	0
Niben101Scf00067g02010	-	-	IPR011598;	sp|Q8S3D2|BH087_ARATH	Transcription factor bHLH87	-	-	-	-	123.672	690.375	159.072	333.602	415.704	285.598	30	222	69.7221	9	8.64048	12.2735	43.655	75.8516	88	6.37761	4.62485	3
Niben101Scf00068g00012	GO:0016747;	-	IPR003480;IPR023213;	dbj|BAD99417.1|	acyl-transferase [Capsicum annuum]	-	-	GO:0016747//acyltransferase activity, transferring groups other than amino-acyl groups;	-	0	0	0	0	0	0	0	0	0	0.924971	1	3.11778	0	0	0	5.1963	2.69432	2
Niben101Scf00068g00013	-	-	IPR002885;	sp|Q3E6Q1|PPR32_ARATH	Pentatricopeptide repeat-containing protein	-	-	-	-	40	45.7062	17.5744	28	22.8637	39.1305	37.5586	42.6096	37.4133	8.08296	13	18	17.4305	19	23.7613	14.3191	8.5412	12.6419
Niben101Scf00068g00014	-	K12196	IPR003959;IPR007330;IPR015415;IPR027417;	sp|C7N914|FTSH_LEPBD	ATP-dependent zinc metalloprotease FtsH	-	-	-	ko04144(Endocytosis)	54.0415	54.0415	45.8034	50	63	58.1017	83	56.1631	72.6183	40.808	72.6911	93	78.6572	73.0727	94	59.2378	59.6275	69.5939
Niben101Scf00069g00001	-	-	-	ref|XP_007050919.1|	LYR motif-containing protein 7 isoform 1 [Theobroma cacao] gb|EOX95076.1| LYR motif-containing protein 7 isoform 1 [Theobroma cacao]	-	-	-	-	173.89	146.259	205.938	392.954	332	255.104	146.145	109	123.672	106.211	152.444	169.399	204.734	186.806	233	248	231.245	196
Niben101Scf00069g00005	GO:0003676;GO:0005524;GO:0046872;	-	IPR000571;IPR014001;IPR027417;	sp|Q08211|DHX9_HUMAN	ATP-dependent RNA helicase A	-	-	GO:0003676//nucleic acid binding;GO:0005524//ATP binding;GO:0046872//metal ion binding;	-	216	224.48	355.902	325.876	236.951	254.619	608.916	255	376	137.12	116	71.2839	250.584	223.02	269.695	114	115.86	75.8476
Niben101Scf00069g01002	GO:0000166;GO:0003676;	K12890	IPR012677;	sp|Q6NYA0|SRS1B_DANRE	Serine/arginine-rich splicing factor 1B	-	-	GO:0000166//nucleotide binding;GO:0003676//nucleic acid binding;	ko03040(Spliceosome)	45	78	31.3749	32	45.3625	24.547	30.3687	17.9094	36	47.8321	41.6237	20	31.1778	47.5157	35.3493	23.903	23.903	25.147
Niben101Scf00069g01003	-	-	IPR012677;	ref|XP_003628466.1|	Pre-mRNA-splicing factor SF2 [Medicago truncatula]	-	-	-	-	459.324	438	350.769	296.916	339	433.371	470.498	661.694	622.516	328.406	385.288	361	508	556.615	578	509.788	456.165	349.24
Niben101Scf00069g02007	-	-	IPR008978;	gb|KEH25572.1|	HSP20-like chaperone superfamily protein [Medicago truncatula]	-	-	-	-	312.62	216.166	193.302	176.029	270	400	205.68	206	272.175	234.219	331.209	409.809	55	76.5313	60.1231	178	176.674	206.833
Niben101Scf00069g02013	-	K00799	IPR010987;IPR012336;	sp|P46423|GSTF_HYOMU	Glutathione S-transferase	-	-	-	ko00480(Glutathione metabolism)	5873	7697.59	9838.24	12294.6	11986.7	6565	4473.89	1896.19	1780	1991.22	2652.49	2755.03	1125.52	1252.31	1330.99	3760	3339	3059.64
Niben101Scf00069g03001	-	-	IPR011598;	sp|Q9T072|BH025_ARATH	Transcription factor bHLH25	-	-	-	-	3.69988	5	3.11778	2.79504	4.41866	3.11778	6.23556	2.69432	1	9	15.1065	9	3.24018	0	1.89805	16.8559	11	10.6294
Niben101Scf00069g03002	-	K14963	IPR015943;IPR020472;	sp|Q5JTN6|WDR38_HUMAN	WD repeat-containing protein 38	-	-	-	-	153.576	177	193	203.356	235	170.649	287.405	149.946	221.234	239	399.664	278.416	217	183.949	176.087	340.237	239.03	280.6
Niben101Scf00069g03003	GO:0003777;GO:0005524;GO:0005871;GO:0007018;GO:0008017;	K10401	IPR001752;IPR027417;IPR027640;	sp|Q54NP8|KIF4_DICDI	Kinesin-related protein 4	GO:0007018//microtubule-based movement;	GO:0005871//kinesin complex;	GO:0003777//microtubule motor activity;GO:0005524//ATP binding;GO:0008017//microtubule binding;	-	38.9099	53.7282	19	278.489	217.368	196	22.8637	27.0187	65.1752	643.301	607.967	967.261	79	83	85.9906	413	415.823	413.208
Niben101Scf00069g04002	-	-	IPR013534;	sp|A4J4I4|GLGA_DESRM	Glycogen synthase	-	-	-	-	208.696	258.492	207.852	102.887	123.939	164	500	359.069	316	20.5211	37.8433	34.1648	286.551	295	319.943	23.1243	32	20.7852
Niben101Scf00069g04005	-	-	-	sp|Q3K1K2|GLGA_STRA1	Glycogen synthase	-	-	-	-	8.13424	10	14.0408	2.04559	9.49023	2.10699	19	7.44055	12.0246	0	0	2.79504	16.57	10.3926	20.7852	0	5	0
Niben101Scf00069g04016	GO:0005515;GO:0008270;	-	IPR006594;IPR006595;IPR013083;IPR013144;IPR024964;IPR027370;IPR027711;	AT2G22690.1	zinc ion binding LENGTH=381	-	-	GO:0005515//protein binding;GO:0008270//zinc ion binding;	-	443.244	326.515	380	377.251	380.125	389.947	638.105	537.297	419.416	256	339	404.388	451	422.303	531.852	370.119	428.772	382
Niben101Scf00069g07004	-	-	-	AT5G65660.1	hydroxyproline-rich glycoprotein family protein LENGTH=136	-	-	-	-	25.9815	12.5735	9	302	159.199	123	7.56042	17.3875	18.0314	41.0863	46	53.1468	22.1993	27	34.2956	54.9691	85.0592	69.6304
Niben101Scf00069g08002	-	-	IPR011598;	sp|Q9LSL1|BH093_ARATH	Transcription factor bHLH93	-	-	-	-	8.18234	18.9805	27.3909	95	86.0977	49.9484	21	15.5889	6.52176	8.83732	6.23556	11.4319	4.49053	7	5	11.6203	12	16.2009
Niben101Scf00069g09006	GO:0004553;GO:0005975;	-	IPR002772;IPR017853;IPR026891;IPR026892;	sp|Q9FLG1|BXL4_ARATH	Beta-D-xylosidase 4	GO:0005975//carbohydrate metabolic process;	-	GO:0004553//hydrolase activity, hydrolyzing O-glycosyl compounds;	-	10.3926	13.0435	5.52333	20.7852	7.27481	12.5735	15	24	30.2129	2	5.4003	0	20.8785	24.2304	27	0	5.54982	3
Niben101Scf00069g10002	-	-	IPR000270;	gb|AES90541.2|	octicosapeptide/phox/Bem1p (PB1) domain protein [Medicago truncatula]	-	-	-	-	344	533.374	148	931.011	1212.01	893.03	296.032	514	855.663	544.808	544	438.567	494.722	572.217	655.773	295.15	181.418	232
Niben101Scf00069g11015	-	K11721	IPR001487;IPR027353;	sp|Q5A4W8|BDF1_CANAL	Bromodomain-containing factor 1	-	-	-	-	139	273.174	58.2732	273	559.121	526.399	122.618	175.635	318.013	373.612	493	573	149.902	133	142.568	509.351	459.327	527.801
Niben101Scf00069g11017	-	-	IPR009836;	AT4G37900.1	Protein of unknown function (duplicated DUF1399) LENGTH=787	-	-	-	-	506.119	364.78	387.982	979	933	912.197	477	525.989	427.527	2752.17	3266.89	2828	370.964	330.215	396	2852.77	2344.11	2688.75
Niben101Scf00069g11022	-	-	-	ref|NP_001046594.1|	product [Oryza sativa Japonica Group]	-	-	-	-	78.8444	49.094	44.6041	15.8024	21	48.895	51.7984	64	58.1985	30.7454	58.5472	54.0415	28.06	37.7205	44	45	39.5092	31
Niben101Scf00069g12007	GO:0004672;GO:0005524;GO:0006468;GO:0016772;	-	IPR011009;IPR013320;IPR024788;	sp|Q9LIG2|RLK6_ARATH	Receptor-like protein kinase	GO:0006468//protein phosphorylation;	-	GO:0004672//protein kinase activity;GO:0005524//ATP binding;GO:0016772//transferase activity, transferring phosphorus-containing groups;	-	7	3.11778	3.72672	3.314	2.07852	7.27481	8.98107	4	21	2.32407	5	1.08006	12.2735	6.64316	12.6419	5	4.25174	4.62485
Niben101Scf00069g12008	-	-	-	-	Unknown protein	-	-	-	-	0	0	0	0	0	2.04559	1.89805	0	2	0	0.924971	0	1.03926	0.93168	0	0	1.03926	0
Niben101Scf00069g12009	GO:0004222;GO:0006508;GO:0008237;	K01414	IPR001567;IPR024077;IPR024079;IPR024080;	sp|Q6FW88|PMIP_CANGA	Mitochondrial intermediate peptidase	GO:0006508//proteolysis;	-	GO:0004222//metalloendopeptidase activity;GO:0008237//metallopeptidase activity;	-	5655.16	4608	4248.55	4207.69	4972	5543.41	4850.32	7125.09	5867.66	5687.87	4553.4	6625	5201	5641.68	5548	8383.42	7181.03	6474.23
Niben101Scf00069g12011	GO:0003700;GO:0005634;GO:0006355;	K09264	IPR002487;	sp|Q6EP49|MAD27_ORYSJ	MADS-box transcription factor 27	GO:0006355//regulation of transcription, DNA-templated;	GO:0005634//nucleus;	GO:0003700//DNA-binding transcription factor activity;	-	0	0	0	0	0	0	1.16203	0	0	2.04559	0	1.05349	1	0	0	3	1.03926	0.93168
Niben101Scf00069g12017	GO:0003824;GO:0004372;GO:0006544;GO:0006563;GO:0030170;	K00600	IPR001085;IPR015424;	AT5G26780.3	serine hydroxymethyltransferase 2 LENGTH=533	GO:0006544//glycine metabolic process;GO:0006563//L-serine metabolic process;	-	GO:0003824//catalytic activity;GO:0004372//glycine hydroxymethyltransferase activity;GO:0030170//pyridoxal phosphate binding;	ko00670(One carbon pool by folate);ko00630(Glyoxylate and dicarboxylate metabolism);ko00460(Cyanoamino acid metabolism);ko00260(Glycine, serine and threonine metabolism)	2226	2560.82	1017.68	562.77	1577.08	2972	971.523	1968.34	2707	50.9237	98.7581	120.408	2568.01	2755.08	2254.25	92	97	120.852
Niben101Scf00069g12019	GO:0003677;GO:0046983;	K09264	IPR002100;	sp|Q6Z6W2|MAD57_ORYSJ	MADS-box transcription factor 57	-	-	GO:0003677//DNA binding;GO:0046983//protein dimerization activity;	-	0	0	1.03926	0	0	0	0	0	0	2	0	0	0	0	0	1.05349	0	0
Niben101Scf00069g12023	-	-	-	ref|XP_002527227.1|	conserved hypothetical protein [Ricinus communis] gb|EEF35153.1| conserved hypothetical protein [Ricinus communis]	-	-	-	-	0	0	0	0	0	0	2.04559	0.949023	2.10699	0	0	0	1	3.11778	0.93168	0	0	0
Niben101Scf00069g13003	-	-	-	emb|CDY71620.1|	BnaC05g50380D [Brassica napus]	-	-	-	-	1.89805	0	0	7.44055	1.84994	1	0	0	0	2.07852	2.07852	4.49053	0	1	0	0	1.08006	2.04559
Niben101Scf00069g13004	-	-	-	emb|CDY71620.1|	BnaC05g50380D [Brassica napus]	-	-	-	-	0	0	0	0	0	0	0	0	0	0	0	0	0	0	1.06294	0	0	0
Niben101Scf00069g14007	-	-	-	emb|CDX68330.1|	BnaA07g23700D [Brassica napus]	-	-	-	-	13.9444	4	10.8006	27.6154	5.69414	27.3909	11	28.6992	3.69988	1	1.03926	1.86336	14.3606	9.35333	18.7067	0.898107	0	0
Niben101Scf00069g14014	-	-	IPR000008;	AT3G17980.1	Calcium-dependent lipid-binding (CaLB domain) family protein LENGTH=177	-	-	-	-	240.223	185.919	283	80.023	122.982	176.746	468.706	694.225	268.534	47	38	81.3424	54	57.2432	61.3676	134.761	123.259	99
Niben101Scf00069g14019	-	-	IPR014756;	sp|P80387|AAKB1_PIG	5'-AMP-activated protein kinase subunit beta-1	-	-	-	-	308.66	252.368	254	177	256.81	334	340.219	431.618	417.57	195.95	149	208.335	270.091	386	518.59	108.075	118.199	93.5333
Niben101Scf00069g15002	GO:0004747;GO:0006014;GO:0016773;	K00847	IPR002139;IPR029056;	AT1G66430.1	pfkB-like carbohydrate kinase family protein LENGTH=384	GO:0006014//D-ribose metabolic process;	-	GO:0004747//ribokinase activity;GO:0016773//phosphotransferase activity, alcohol group as acceptor;	ko00520(Amino sugar and nucleotide sugar metabolism);ko00500(Starch and sucrose metabolism);ko00051(Fructose and mannose metabolism)	2.04559	6.64316	3.16048	2	4.25174	2.77491	8	4.15704	5.59008	2.20933	2.07852	3.11778	6.28675	4	7	10.4583	6	4.32024
Niben101Scf00069g15006	-	-	-	-	Unknown protein	-	-	-	-	0	0	0	0	0	0	0	0	0	0	0	0	0	0	0	0	0	1
Niben101Scf00069g15007	-	K14190	IPR026506;	sp|Q6ZNW5|GDPP1_HUMAN	GDP-D-glucose phosphorylase 1	-	-	-	ko00053(Ascorbate and aldarate metabolism)	1778	1715.16	1353	1136.22	1641.58	1487.12	1933.16	2344	1833.56	753.851	844	844.918	1027.64	1216.24	1318.82	1472.63	1134.31	1098
Niben101Scf00069g15010	GO:0004672;GO:0004674;GO:0005524;GO:0006468;GO:0016772;	-	IPR011009;	sp|Q9LIG2|RLK6_ARATH	Receptor-like protein kinase	GO:0006468//protein phosphorylation;	-	GO:0004672//protein kinase activity;GO:0004674//protein serine/threonine kinase activity;GO:0005524//ATP binding;GO:0016772//transferase activity, transferring phosphorus-containing groups;	-	89	85.0348	44.3986	55	62.3556	77.3294	62.9659	119.515	117.436	40.4148	62	35	115.041	115	135.007	191.262	152.793	175.934
Niben101Scf00069g15018	-	-	-	AT2G03070.1	mediator subunit 8 LENGTH=524	-	-	-	-	169.399	191.224	158.067	432	410	336.99	296	198.731	223.992	514.37	562.566	722	194.517	95.272	121	589.26	327.02	541.286
Niben101Scf00069g15020	-	K13448	IPR011992;	AT5G37770.1	EF hand calcium-binding protein family LENGTH=161	-	-	-	ko04626(Plant-pathogen interaction)	344.539	610.607	186.957	612.08	583	430.489	362.589	393	401.154	1500.94	1822.7	1188.91	260.854	234.406	325	862	966.813	758
Niben101Scf00069g15032	-	K13448	IPR011992;	AT3G03430.1	Calcium-binding EF-hand family protein LENGTH=83	-	-	-	ko04626(Plant-pathogen interaction)	1	2.07852	2.79504	0	1.03926	1.03926	12.5735	0	1	1.16203	2	2.16012	6.13676	5.69414	5.26747	3	7.44055	5.54982
Niben101Scf00071g04002	-	-	IPR002885;IPR011990;	sp|Q9LFL5|PP390_ARATH	Pentatricopeptide repeat-containing protein	-	-	-	-	16	13	20.9166	7	22.6813	22.5014	15.1844	24.2304	17	8.50348	11.0996	14	8.31407	4.6584	9.94199	2.07852	8.31407	3.59243
Niben101Scf00071g05019	GO:0005488;	-	IPR013320;IPR016024;	sp|Q6VNB8|WDFY3_MOUSE	WD repeat and FYVE domain-containing protein 3	-	-	GO:0005488//binding;	-	2384.06	2358	2457.51	2923.83	3369	2976.44	1746.9	2885.39	1911.2	2998.26	2559.6	3902	931	851.771	849	4100.99	3537.84	3513.28
Niben101Scf00072g00001	GO:0009055;GO:0020037;	-	IPR009056;IPR025322;	gb|ABF96025.1|	expressed protein [Oryza sativa Japonica Group]	-	-	GO:0009055//electron transfer activity;GO:0020037//heme binding;	-	23.198	81.0622	14.5496	79.9315	48	34	18.5926	29	14.0408	13.2963	13.2863	7.37446	3	1.06294	5.54982	4	9.35333	8.38512
Niben101Scf00072g02005	GO:0005506;GO:0016705;GO:0020037;GO:0055114;	-	IPR001128;	AT5G07990.1	Cytochrome P450 superfamily protein LENGTH=513	GO:0055114//obsolete oxidation-reduction process;	-	GO:0005506//iron ion binding;GO:0016705//oxidoreductase activity, acting on paired donors, with incorporation or reduction of molecular oxygen;GO:0020037//heme binding;	-	244	288.376	147.282	305.585	359.242	402	308.251	277.491	311	197.459	189.131	268.434	141.339	135.104	137.41	217	161	226.597
Niben101Scf00072g04001	-	-	IPR002885;IPR011990;	sp|Q9LSL9|PP445_ARATH	Pentatricopeptide repeat-containing protein	-	-	-	-	85.0973	61	64.4341	59.6275	85.0592	114.319	108.083	61.0713	114	52	191.736	76	82.0845	72.6183	84.463	96.9215	57	68.0278
Niben101Scf00072g04006	-	-	-	sp|Q5EB97|ZCH10_RAT	Zinc finger CCHC domain-containing protein 10	-	-	-	-	202.074	215	284	333.504	306	272.175	324.225	239.154	298.139	476	573.985	753.851	202	246.304	238.51	407.621	373.094	380.369
Niben101Scf00072g05003	-	K15472	IPR001128;	sp|O48957|C99A1_SORBI	Cytochrome P450 CYP99A1	-	-	-	ko00909(Sesquiterpenoid and triterpenoid biosynthesis)	3.79609	3.16048	3	5.31468	3.69988	7	0	7.45344	1.10467	1.03926	1.03926	6.28675	1	0	1.16203	0	1.08006	1.02279
Niben101Scf00072g05004	GO:0005506;GO:0016705;GO:0020037;GO:0055114;	K15472	IPR001128;	sp|O48957|C99A1_SORBI	Cytochrome P450 CYP99A1	GO:0055114//obsolete oxidation-reduction process;	-	GO:0005506//iron ion binding;GO:0016705//oxidoreductase activity, acting on paired donors, with incorporation or reduction of molecular oxygen;GO:0020037//heme binding;	ko00909(Sesquiterpenoid and triterpenoid biosynthesis)	448.138	572.217	151.732	154.85	400.556	821	100	533.374	143	157.689	117.621	219.224	51.6212	15	56.3356	73.9977	79	65.4733
Niben101Scf00072g06001	-	K15472	IPR001128;	sp|O48957|C99A1_SORBI	Cytochrome P450 CYP99A1	-	-	-	ko00909(Sesquiterpenoid and triterpenoid biosynthesis)	182.439	228	68.0438	60.3448	186.008	259.16	48	155.189	45.3236	39	33.2563	108.075	15.4653	13.5104	14.5496	29.6375	32	27
Niben101Scf00072g07005	GO:0005524;GO:0016887;	-	IPR003439;IPR027417;	sp|Q74IV9|METN_LACJO	Methionine import ATP-binding protein MetN	-	-	GO:0005524//ATP binding;GO:0016887//ATP hydrolysis activity;	-	729.173	593.831	572	671.361	689.443	916.872	685.911	631.87	582.871	370	1908	1550.15	506	564.871	641.291	801.924	819.619	798
Niben101Scf00072g07008	-	-	IPR001611;IPR003591;	AT3G24240.1	Leucine-rich repeat receptor-like protein kinase family protein LENGTH=1141	-	-	-	-	15.5889	24.2489	24	21	24.4027	28	28.0816	34.7749	42.706	61.1027	141	145.622	20.3494	31	50.9237	66.1493	57.4426	71.7089
Niben101Scf00072g09003	-	-	IPR000644;	AT5G53750.1	CBS domain-containing protein LENGTH=408	-	-	-	-	731.297	657.673	764.837	323	392.223	414.387	1000	720.207	518.014	119.304	85.2193	169.399	501.144	554	720	210.328	149	113.406
Niben101Scf00072g10016	-	-	-	emb|CDY28651.1|	BnaC09g32240D [Brassica napus]	-	-	-	-	145.496	138.82	145.816	139.261	134.064	134.716	136	106	149.902	81	114.486	75.6866	96.8003	96.9215	118	139.244	126.721	119
Niben101Scf00073g00008	GO:0003677;GO:0003887;GO:0005524;GO:0006260;GO:0009360;	-	IPR012763;IPR027417;	sp|P53016|RFC4_CAEEL	Replication factor C subunit 4	GO:0006260//DNA replication;	GO:0009360//DNA polymerase III complex;	GO:0003677//DNA binding;GO:0003887//DNA-directed DNA polymerase activity;GO:0005524//ATP binding;	-	117	155.713	103	195.491	170.806	159.436	338.172	114	113.734	799.175	1257	1169.17	238.51	230.875	300.346	848.036	714.893	869
Niben101Scf00073g03006	GO:0004842;GO:0005488;GO:0005515;GO:0016567;	-	IPR013083;IPR016024;	sp|Q9C7R6|PUB17_ARATH	U-box domain-containing protein 17	GO:0016567//protein ubiquitination;	-	GO:0004842//ubiquitin-protein transferase activity;GO:0005488//binding;GO:0005515//protein binding;	-	654	926.879	372.763	512	706.696	577.641	679.369	728.521	497.805	1119.04	1230	824	518.267	396	497.908	1621.13	1539.31	1585.51
Niben101Scf00073g03012	-	-	-	-	Unknown protein	-	-	-	-	6.23556	17.6674	2.69432	24	10	8.13424	15	7.56042	2.04559	2.84707	6.32097	6	11.6923	7.39977	3	15.5889	15.8386	9.94199
Niben101Scf00073g03013	GO:0005524;GO:0016772;	-	IPR001480;IPR003609;IPR011009;IPR013320;	sp|Q9FN94|RLK7_ARATH	Receptor-like protein kinase	-	-	GO:0005524//ATP binding;GO:0016772//transferase activity, transferring phosphorus-containing groups;	-	10.8006	20.4559	10.4392	25.2839	19	10.6294	26.8242	14	5.1963	10.2485	14.3606	15.5889	13.5104	2.69432	11	16	17.4305	12
Niben101Scf00073g03014	GO:0004672;GO:0005524;GO:0006468;GO:0016772;	-	IPR011009;	sp|Q9LIG2|RLK6_ARATH	Receptor-like protein kinase	GO:0006468//protein phosphorylation;	-	GO:0004672//protein kinase activity;GO:0005524//ATP binding;GO:0016772//transferase activity, transferring phosphorus-containing groups;	-	3	9.35333	5.59008	18.7793	8.31407	8.31407	11.6754	6	4	4.64814	6	6.48036	7.15955	0.949023	1.05349	5	12.7552	5.54982
Niben101Scf00073g03015	-	-	IPR021929;	gb|AAU95633.1|	R1 [Solanum tuberosum]	-	-	-	-	0	0	0	0	0	0	0	0	0	8.50348	6.4748	17	0	0.93168	1.10467	4.15704	10.3926	3.59243
Niben101Scf00073g04001	-	-	-	ref|XP_002522268.1|	conserved hypothetical protein [Ricinus communis] gb|EEF40126.1| conserved hypothetical protein [Ricinus communis]	-	-	-	-	82.1726	55	51.0209	73.0727	92	80.023	42.8573	35.3493	31.1778	17.6674	11.6754	32	28	33.699	13	21.6012	10.2279	15.1844
Niben101Scf00073g04002	GO:0003700;GO:0005634;GO:0006355;GO:0009408;GO:0043565;	K09419	IPR011991;IPR027725;	AT2G26150.1	heat shock transcription factor A2 LENGTH=345	GO:0006355//regulation of transcription, DNA-templated;GO:0009408//response to heat;	GO:0005634//nucleus;	GO:0003700//DNA-binding transcription factor activity;GO:0043565//sequence-specific DNA binding;	-	418.668	549.768	506.119	240.693	284	322	474.11	280	183.61	169.784	214.479	119.045	196	167.944	225.693	469	473.902	295.342
Niben101Scf00073g04006	-	-	IPR006458;	AT4G18830.1	ovate family protein 5 LENGTH=349	-	-	-	-	21	29.1616	9.20513	14.2353	37.9258	23	27.6363	9.24971	13	1144.22	1293.17	1100.25	34.2956	32.217	25.147	370	225	323.046
Niben101Scf00073g05010	-	-	IPR008540;	sp|Q9ZV88|BEH4_ARATH	BES1/BZR1 homolog protein 4	-	-	-	-	465.26	507	304.503	533.852	890.36	779.444	505.08	448.155	493	1122	1143.44	998	451.465	336.499	342.597	680.558	561	588.866
Niben101Scf00073g05011	-	K20523	IPR007461;IPR013083;	AT1G29800.1	RING/FYVE/PHD-type zinc finger family protein LENGTH=510	-	-	-	-	363.733	281	313	159.199	229	304.577	683.225	538.096	624.722	167	138.182	144.295	588	674.479	634.474	437.447	390.761	324.249
Niben101Scf00073g06001	-	K06027	IPR003959;IPR027417;IPR029067;	sp|B8ZRF0|ARC_MYCLB	Proteasome-associated ATPase	-	-	-	-	0	1.05349	0	0	0.924971	0	0	0	0	7.27481	13.5104	8.08296	1	0	1.16203	2	2.16012	1.02279
Niben101Scf00073g06002	-	K06027	IPR003959;IPR027417;	sp|A3Q196|ARC_MYCSJ	Proteasome-associated ATPase	-	-	-	-	0.93168	2.20933	0	1.03926	0	0	0	0	0	2.16012	9.20513	4.74511	0	1	0	5.54982	3	4.15704
Niben101Scf00073g06003	-	K06027	IPR003959;IPR027417;	sp|B0K657|FTSH2_THEPX	ATP-dependent zinc metalloprotease FtsH 2	-	-	-	-	6.97221	1	3.24018	1.02279	4.74511	4.21398	4	0	0.924971	3	11.4319	1.86336	2.20933	0	2.07852	8.08296	8	4
Niben101Scf00073g06005	-	-	IPR014710;	sp|Q38998|AKT1_ARATH	Potassium channel AKT1	-	-	-	-	78.6572	85.0973	62	92.4941	76.3977	114.885	82.1015	70.6696	76.3391	72	93	120.852	77	82.0845	83.869	77.8198	60.0492	60
Niben101Scf00073g06018	-	-	-	-	Unknown protein	-	-	-	-	0	0	0	1	0	1	0	2.04559	0	32.6583	22	38.2657	0.924971	0	0	38.1989	39.7679	27.0207
Niben101Scf00073g06020	GO:0005515;GO:0016791;	K15731	IPR004274;IPR023214;	sp|Q9PTJ6|CTDSL_CHICK	CTD small phosphatase-like protein	-	-	GO:0005515//protein binding;GO:0016791//phosphatase activity;	-	4.09117	3.79609	1.05349	4	5.31468	3.69988	2	4.15704	3.72672	16.57	11.4319	21.8244	4.49053	3	7	6.97221	6	3.24018
Niben101Scf00074g00009	-	-	IPR011033;	ref|WP_026719171.1|	photosystem reaction center subunit H [Fischerella sp. PCC 9431]	-	-	-	-	207.852	171.429	272.852	143.418	213.048	151.78	507	211	184.764	67	101.526	67.5043	165.13	174.88	200	130.741	86.0223	67
Niben101Scf00074g01003	GO:0004672;GO:0004674;GO:0005524;GO:0006468;GO:0016772;	-	IPR011009;	AT5G01920.1	Protein kinase superfamily protein LENGTH=495	GO:0006468//protein phosphorylation;	-	GO:0004672//protein kinase activity;GO:0004674//protein serine/threonine kinase activity;GO:0005524//ATP binding;GO:0016772//transferase activity, transferring phosphorus-containing groups;	-	1040	1150.41	870	376.941	532.875	594.088	873.347	738	561.23	45.3236	91	49.8844	613.045	683.788	703.578	109.122	84.422	85
Niben101Scf00074g02001	-	-	-	-	Unknown protein	-	-	-	-	0	5.31468	1.84994	1	0	1.86336	3.314	4.15704	2.07852	0	0	0	2.32407	0	0	0	0	0
Niben101Scf00074g02021	-	-	-	ref|NP_001058682.1|	product [Oryza sativa Japonica Group]	-	-	-	-	25.9815	21.8244	38.6186	27	22	40.6712	52	29.1616	33.7522	10.4392	14.7489	8	24.4475	36.0739	45	32.217	16.7702	30.9306
Niben101Scf00074g02023	GO:0004672;GO:0004674;GO:0005524;GO:0006468;GO:0016772;	-	IPR011009;	sp|Q9LIG2|RLK6_ARATH	Receptor-like protein kinase	GO:0006468//protein phosphorylation;	-	GO:0004672//protein kinase activity;GO:0004674//protein serine/threonine kinase activity;GO:0005524//ATP binding;GO:0016772//transferase activity, transferring phosphorus-containing groups;	-	0	0	0	1.05349	0	0	0	0	0	0	0	0	0	0	0	0	0	0
Niben101Scf00074g02024	-	-	IPR002182;IPR025875;IPR027417;	sp|Q9T048|DRL27_ARATH	Disease resistance protein	-	-	-	-	11	15.5889	13.9752	14.3606	14.5496	30.1385	14.3697	12	8	22.0787	23	23.7613	10.2279	8.5412	24.2304	21	19.1328	13.8746
Niben101Scf00074g02025	-	-	IPR001611;	sp|Q7XBQ9|RGA2_SOLBU	Disease resistance protein RGA2	-	-	-	-	0	0	0	0	0	0	0	0	0	0	0.924971	1	0	0	0	0	0	0
Niben101Scf00074g02026	-	-	IPR001810;	sp|Q9CAZ0|SKI24_ARATH	F-box protein SKIP24	-	-	-	-	214.913	178	180.699	114.696	160	220.323	254.349	345.76	404.272	111.201	86.2183	117	263	332.342	333	204.131	211.718	164.181
Niben101Scf00074g02028	-	K07767	IPR003959;IPR027417;	sp|Q83FV7|FTSH_TROWT	ATP-dependent zinc metalloprotease FtsH	-	-	-	-	81.7452	55.0807	50.9237	36.8224	55	48	81.3424	69	68.0438	31.7066	29.4197	27.3909	35	64.839	49.9484	42	46.7667	38.1989
Niben101Scf00074g02029	-	-	-	sp|Q9CAZ0|SKI24_ARATH	F-box protein SKIP24	-	-	-	-	166	163.089	157.51	151.844	164.345	147	275.3	166.495	166	217.205	272.982	363.435	183.949	184.988	187.704	194	146	153.389
Niben101Scf00074g02031	-	-	IPR013320;	sp|Q8GYF5|WAKLR_ARATH	Wall-associated receptor kinase-like 21	-	-	-	-	0.924971	7	0	1.86336	1.10467	0	4.15704	1.79621	1	0	0	0	1.08006	1.02279	0.949023	0	0	0
Niben101Scf00075g00009	GO:0047134;GO:0055114;	-	IPR011424;	AT2G44390.1	Cysteine/Histidine-rich C1 domain family protein LENGTH=209	GO:0055114//obsolete oxidation-reduction process;	-	GO:0047134//protein-disulfide reductase (NAD(P)) activity;	-	0.898107	0	1	1.16203	0	0	5.11396	2.84707	4.21398	120	205.146	175.744	1	3.11778	3.72672	180.06	148.614	166.281
Niben101Scf00077g00010	GO:0016773;	-	IPR000403;	sp|O22199|P4KG1_ARATH	Phosphatidylinositol 4-kinase gamma 1	-	-	GO:0016773//phosphotransferase activity, alcohol group as acceptor;	-	8.5412	2.10699	4	1.06294	1.84994	6	2.07852	7.45344	4.41866	29.0993	83.1407	28.7394	17	23	15.1065	45	27.0015	41.9345
Niben101Scf00077g00011	-	-	IPR008889;	gb|ABA91340.1|	VQ motif family protein, expressed [Oryza sativa Japonica Group]	-	-	-	-	292.547	356.807	159.007	472.863	475.997	499	181	304.453	301	276.495	291.496	208.785	369.777	471	526.153	211.818	188	206.813
Niben101Scf00077g00018	-	K03626	IPR016641;	sp|Q9M612|NACA_PINTA	Nascent polypeptide-associated complex subunit alpha-like protein	-	-	-	-	898.253	823	857.567	450.029	544.739	715.323	924	931.131	822.299	168	221.362	181.678	828.499	711.893	721.246	248.776	253	222
Niben101Scf00077g01008	GO:0000079;GO:0006355;GO:0019901;	K15188	IPR015429;	sp|Q2QQS5|CCT14_ORYSJ	Cyclin-T1-4	GO:0000079//regulation of cyclin-dependent protein serine/threonine kinase activity;GO:0006355//regulation of transcription, DNA-templated;	-	GO:0019901//protein kinase binding;	-	548.474	485.61	618	487.413	447.206	576.635	876.096	605.888	563.113	294	378	428.791	606	668.557	670.952	521.013	515.159	502
Niben101Scf00077g02004	GO:0004857;GO:0030599;	-	IPR006501;	AT1G14890.1	Plant invertase/pectin methylesterase inhibitor superfamily protein LENGTH=219	-	-	GO:0004857//enzyme inhibitor activity;GO:0030599//pectinesterase activity;	-	0	0	0	4	0	1	0	0	0	8.42796	15	23.3846	0	1	0	33.5405	46.3959	42.6096
Niben101Scf00077g03005	GO:0005506;GO:0016705;GO:0020037;GO:0055114;	K09754	IPR001128;	AT5G07990.1	Cytochrome P450 superfamily protein LENGTH=513	GO:0055114//obsolete oxidation-reduction process;	-	GO:0005506//iron ion binding;GO:0016705//oxidoreductase activity, acting on paired donors, with incorporation or reduction of molecular oxygen;GO:0020037//heme binding;	ko00945(Stilbenoid, diarylheptanoid and gingerol biosynthesis);ko00941(Flavonoid biosynthesis);ko00940(Phenylpropanoid biosynthesis)	278.2	527.657	200.164	779	816.334	316.34	103	589.26	75.4661	345.76	177.713	149.653	61.0713	59	104	816.91	604	794.924
Niben101Scf00077g04002	-	-	IPR021099;	AT5G45790.2	Ubiquitin carboxyl-terminal hydrolase family protein LENGTH=439	-	-	-	-	231.755	251.554	162.386	179.792	312.817	274.821	137	235	256.81	115	160.929	157.51	169.875	190.683	200	186.014	181.294	162
Niben101Scf00077g05004	GO:0003676;GO:0046872;	K09191	IPR013087;	sp|Q5JNZ3|ZN311_HUMAN	Zinc finger protein 311	-	-	GO:0003676//nucleic acid binding;GO:0046872//metal ion binding;	-	328	567.073	247	479.547	601.402	510.574	408.756	450	297.622	209.968	248	294.11	177.951	194.421	277.482	201.616	174.233	181
Niben101Scf00077g05011	GO:0005515;GO:0006457;	-	IPR001179;IPR011990;IPR023566;	sp|Q9CR16|PPID_MOUSE	Peptidyl-prolyl cis-trans isomerase D	GO:0006457//protein folding;	-	GO:0005515//protein binding;	-	75	136.056	8.32474	2	36.3741	93.168	33.14	83.1407	57.1593	0	3	2	80.1804	88	76.6842	6.13676	3.79609	3.16048
Niben101Scf00077g05012	GO:0046373;GO:0046556;	K01209	IPR010720;IPR017853;	sp|Q8VZR2|ASD2_ARATH	Alpha-L-arabinofuranosidase 2	GO:0046373//L-arabinose metabolic process;	-	GO:0046556//alpha-L-arabinofuranosidase activity;	ko00520(Amino sugar and nucleotide sugar metabolism)	0	0	0	0	0	1.16203	0	1.08006	2.04559	0.949023	0	0	1.06294	0	0	0	0	0
Niben101Scf00077g05015	GO:0005506;GO:0016705;GO:0020037;GO:0055114;	K09754	IPR001128;	AT5G07990.1	Cytochrome P450 superfamily protein LENGTH=513	GO:0055114//obsolete oxidation-reduction process;	-	GO:0005506//iron ion binding;GO:0016705//oxidoreductase activity, acting on paired donors, with incorporation or reduction of molecular oxygen;GO:0020037//heme binding;	ko00945(Stilbenoid, diarylheptanoid and gingerol biosynthesis);ko00941(Flavonoid biosynthesis);ko00940(Phenylpropanoid biosynthesis)	636.155	702.658	799.077	731.125	746	647.327	742.752	794	630.83	486.337	678.264	572.632	1335.45	1035.52	1353	707	747.188	605
Niben101Scf00077g06002	GO:0016020;GO:0016021;GO:0022857;	-	IPR000620;IPR030184;	AT5G07050.1	nodulin MtN21 /EamA-like transporter family protein LENGTH=402	-	GO:0016020//membrane;GO:0016021//integral component of membrane;	GO:0022857//transmembrane transporter activity;	-	1	0	0	0	0	0	0	0	1	0	0	0	0	0.949023	1.05349	0	1.06294	0
Niben101Scf00077g08010	GO:0005506;GO:0016705;GO:0020037;GO:0055114;	-	IPR001128;	sp|P85191|CP450_HELAN	Cytochrome P450	GO:0055114//obsolete oxidation-reduction process;	-	GO:0005506//iron ion binding;GO:0016705//oxidoreductase activity, acting on paired donors, with incorporation or reduction of molecular oxygen;GO:0020037//heme binding;	-	0	0	0	0	0	0	0	0	0	0	0	1	0	0	0	0	0	0
Niben101Scf00077g08012	GO:0016747;	-	IPR003480;IPR023213;	AT3G26040.1	HXXXD-type acyl-transferase family protein LENGTH=442	-	-	GO:0016747//acyltransferase activity, transferring groups other than amino-acyl groups;	-	0	0	0	0	0	0	0	0	0	0	0.898107	0	1	0	0	1.08006	0	0
Niben101Scf00077g08013	GO:0003700;GO:0006355;GO:0043565;	-	IPR004827;	sp|P14233|TGA1B_TOBAC	TGACG-sequence-specific DNA-binding protein TGA-1B	GO:0006355//regulation of transcription, DNA-templated;	-	GO:0003700//DNA-binding transcription factor activity;GO:0043565//sequence-specific DNA binding;	-	1175.36	1203.46	1181.64	864.877	1089	853	1799.99	1218	1044.42	558.445	726.951	699.52	930	834.404	825.074	1311	1285.56	1023.92
Niben101Scf00077g08025	GO:0008152;GO:0016758;	K12937	IPR002213;	AT5G65550.1	UDP-Glycosyltransferase superfamily protein LENGTH=466	GO:0008152//metabolic process;	-	GO:0016758//hexosyltransferase activity;	ko00942(Anthocyanin biosynthesis)	0	0	0	0.949023	5.26747	2	1.06294	0	0	0	0	3.314	0	2.07852	0	6	6	5.81017
Niben101Scf00077g08026	GO:0008152;GO:0016758;	K12356	IPR002213;	AT2G18570.1	UDP-Glycosyltransferase superfamily protein LENGTH=470	GO:0008152//metabolic process;	-	GO:0016758//hexosyltransferase activity;	ko00940(Phenylpropanoid biosynthesis)	22.1993	20	13.5104	60.5592	65.1752	68.5911	24.9422	27.8413	15	27	81.3424	31	18.361	11.2507	10.4392	38.9793	37	28.6992
Niben101Scf00078g02001	GO:0003735;GO:0005622;GO:0005840;GO:0006412;GO:0019843;	K02940	IPR000702;	sp|P49210|RL9_ORYSJ	60S ribosomal protein L9	GO:0006412//translation;	GO:0005622//intracellular anatomical structure;GO:0005840//ribosome;	GO:0003735//structural constituent of ribosome;GO:0019843//rRNA binding;	ko03010(Ribosome)	540.66	1189	1261	1198.06	649	732.281	1512.71	1085.68	1369.54	951	1590.15	541.108	1127	501.962	831.058	1441.59	678.636	973.786
Niben101Scf00078g02005	GO:0003735;GO:0005622;GO:0005840;GO:0006412;	K02901	IPR001141;IPR008991;	sp|P41101|RL27_SOLTU	60S ribosomal protein L27	GO:0006412//translation;	GO:0005622//intracellular anatomical structure;GO:0005840//ribosome;	GO:0003735//structural constituent of ribosome;	ko03010(Ribosome)	620.661	782.747	993	882.236	540.183	920	1100.58	859.94	1084.78	384.526	553.925	263.145	663	465	784.373	601	587.552	543.103
Niben101Scf00078g02007	-	-	IPR008629;	ref|WP_015140241.1|	GUN4 protein [N [Nostoc sp. PCC 7524]	-	-	-	-	119.255	130.35	86.2585	13.5104	37.7205	82	47	38.3471	88	1.08006	2.04559	4.74511	74.7981	191	221.09	3.69988	2	4.15704
Niben101Scf00079g00013	GO:0009055;GO:0016491;GO:0030151;GO:0043546;GO:0046872;GO:0055114;	K10534	IPR008335;IPR014756;	AT1G37130.1	nitrate reductase 2 LENGTH=917	GO:0055114//obsolete oxidation-reduction process;	-	GO:0009055//electron transfer activity;GO:0016491//oxidoreductase activity;GO:0030151//molybdenum ion binding;GO:0043546//molybdopterin cofactor binding;GO:0046872//metal ion binding;	ko00910(Nitrogen metabolism)	0	0	0	1.02279	0	0	0	0	0	14	32.217	20.497	0	0	2.07852	11.6754	11	12
Niben101Scf00079g00014	-	K18328	IPR029052;	sp|Q94K01|DBR1_ARATH	Lariat debranching enzyme	-	-	-	-	0	0	0	0	0	0	0	0	0	0	0	0	0	0	0	0	0	2
Niben101Scf00079g00015	GO:0015095;GO:0015693;GO:0016021;	-	IPR008521;	sp|Q3SWX0|NIPA2_BOVIN	Magnesium transporter NIPA2	GO:0015693//magnesium ion transport;	GO:0016021//integral component of membrane;	GO:0015095//magnesium ion transmembrane transporter activity;	-	86.2585	70.9504	85	108	104.583	104	91.8051	101.256	84.463	213.859	119	158.377	63.823	82	112.24	217.081	224.247	245.265
Niben101Scf00080g00001	GO:0005515;GO:0006457;	K09571	IPR001179;IPR011990;IPR023114;IPR023566;	sp|Q6CBP4|PPID_YARLI	Peptidyl-prolyl cis-trans isomerase D	GO:0006457//protein folding;	-	GO:0005515//protein binding;	-	32.7294	29.4197	23.1769	32	17.007	27.7491	60	49.8844	54.9691	68.4892	124.711	44.6881	59.2751	71	61	160.361	103	123.127
Niben101Scf00080g00010	-	K14548	IPR015943;	AT4G07410.1	Transducin family protein / WD-40 repeat family protein LENGTH=815	-	-	-	ko03008(Ribosome biogenesis in eukaryotes)	349.191	324.225	394.365	421.939	467.667	340.382	395	292	359.069	255	408.263	348.772	233.46	202.271	230	331.636	252.517	243
Niben101Scf00080g01007	-	-	-	ref|XP_002510079.1|	conserved hypothetical protein [Ricinus communis] gb|EEF52266.1| conserved hypothetical protein [Ricinus communis]	-	-	-	-	3	1.16203	7	60.4833	17.3875	19.9295	1.05349	1	1.06294	3.69988	1	7.27481	0	5.52333	2.07852	3.11778	1.79621	2
Niben101Scf00080g02004	GO:0005215;GO:0006810;GO:0016020;GO:0055085;	K14611	IPR006043;	sp|Q0WPE9|NAT7_ARATH	Nucleobase-ascorbate transporter 7	GO:0006810//transport;GO:0055085//transmembrane transport;	GO:0016020//membrane;	GO:0005215//transporter activity;	-	0	0	0	0	1.03926	0	0	0	0	11.6754	10	85	0	0	0	12.2735	11.3883	14.7489
Niben101Scf00080g04007	GO:0000145;GO:0006887;	K07195	IPR004140;IPR016159;	AT4G31540.1	exocyst subunit exo70 family protein G1 LENGTH=687	GO:0006887//exocytosis;	GO:0000145//exocyst;	-	-	2.07852	0	1.79621	0	0	1.16203	2	0	0	0	1.05349	0	0	0.924971	0	0	0	0
Niben101Scf00080g04013	GO:0000145;GO:0006887;	K07195	IPR004140;IPR016159;	gb|EMT29261.1|	Exocyst complex component 7 [Aegilops tauschii]	GO:0006887//exocytosis;	GO:0000145//exocyst;	-	-	0	0	0	2.10699	0	0	0	0	0	0	0	0	1.03926	0.898107	0	0	0	0
Niben101Scf00080g05005	-	-	IPR016140;	emb|CDY36856.1|	BnaC08g09910D [Brassica napus]	-	-	-	-	0	0	0	0	0	0	0	0	0	1.16203	0	0	0	0	0	1	0	0.924971
Niben101Scf00080g05006	GO:0003676;GO:0046872;	-	IPR013087;	sp|Q42430|ZFP1_WHEAT	Zinc finger protein 1	-	-	GO:0003676//nucleic acid binding;GO:0046872//metal ion binding;	-	3095	3322	3178.16	1191	2334.01	2261.39	4116.86	3891.61	2157	450.684	581.807	537	1091.22	709.94	1059.37	507.159	496.766	357.447
Niben101Scf00081g00010	GO:0004672;GO:0004674;GO:0005524;GO:0006468;GO:0016772;	-	IPR011009;	AT1G53570.1	mitogen-activated protein kinase kinase kinase 3 LENGTH=609	GO:0006468//protein phosphorylation;	-	GO:0004672//protein kinase activity;GO:0004674//protein serine/threonine kinase activity;GO:0005524//ATP binding;GO:0016772//transferase activity, transferring phosphorus-containing groups;	-	203.324	209	122.238	43.4736	126	154.85	82.9195	216.514	203.695	27.0207	37.7205	80	176	198.708	178	90.725	90.0057	66.4316
Niben101Scf00081g00011	-	-	IPR018108;IPR023395;	sp|Q54FU9|MCFW_DICDI	Mitochondrial substrate carrier family protein W	-	-	-	-	255.178	252.54	203.695	96.9955	130	180	304.453	299	306.737	54.208	50.2982	55.8352	154	234.909	232.168	88	85.2193	68.0126
Niben101Scf00082g00008	GO:0004672;GO:0005524;GO:0006468;GO:0016772;	-	IPR011009;IPR013320;	sp|Q9FN94|RLK7_ARATH	Receptor-like protein kinase	GO:0006468//protein phosphorylation;	-	GO:0004672//protein kinase activity;GO:0005524//ATP binding;GO:0016772//transferase activity, transferring phosphorus-containing groups;	-	258	209.532	192.285	189.805	291.818	229	300.811	208.118	237	114.319	136.957	217.619	118.476	222.401	229.017	133	109	149.902
Niben101Scf00082g03004	GO:0009055;GO:0015035;GO:0045454;	K03676	IPR011905;IPR012336;	sp|Q7G8Y5|GRXC1_ORYSJ	Glutaredoxin-C1	GO:0045454//cell redox homeostasis;	-	GO:0009055//electron transfer activity;GO:0015035//protein-disulfide reductase activity;	-	20.3494	5	8.31407	6.52176	12.1513	24.9422	9.35333	15.2678	17	5	2.32407	0	10.8006	21.4786	21.8275	4.21398	1	1.06294
Niben101Scf00082g05001	GO:0009055;GO:0015035;GO:0045454;	K03676	IPR011905;IPR012336;	sp|Q7G8Y5|GRXC1_ORYSJ	Glutaredoxin-C1	GO:0045454//cell redox homeostasis;	-	GO:0009055//electron transfer activity;GO:0015035//protein-disulfide reductase activity;	-	37.7205	16	13	9.29628	36	108.006	2.04559	38.9099	71.6376	0	0	0	21	47.8059	32.6088	0	0	1.03926
Niben101Scf00082g06011	-	-	IPR015915;	sp|Q9MA55|ACBP4_ARATH	Acyl-CoA-binding domain-containing protein 4	-	-	-	-	106.291	116.938	14	38.2657	50.8734	140	3.11778	51.2424	78.4312	20.7852	23.903	24.2489	83	87	116.203	11	10.8006	9.20513
Niben101Scf00082g07001	-	K03354	IPR011990;	sp|Q8VY89|APC7_ARATH	Anaphase-promoting complex subunit 7	-	-	-	ko04120(Ubiquitin mediated proteolysis)	178.883	192.212	176.674	120.554	132.022	220	204	269.592	218	131.767	206.604	130.965	161.185	155	196.643	155.395	156	133.025
Niben101Scf00082g07005	-	-	-	emb|CDY44792.1|	BnaC02g00950D [Brassica napus]	-	-	-	-	39.5092	33	46.4426	51.1396	68.3296	54.7817	34	28.6992	25.8992	37	128.868	108.075	18.7793	14.5496	18.7067	57.4788	54	39
Niben101Scf00082g07008	-	K03354	IPR011990;	sp|Q8VY89|APC7_ARATH	Anaphase-promoting complex subunit 7	-	-	-	ko04120(Ubiquitin mediated proteolysis)	117.986	54.5733	64	70.6696	70.8077	89.4779	106.004	86.2585	93.4031	46	92	56.9397	105	100.446	73.6411	93.9532	84.2796	64
Niben101Scf00082g08002	-	K11583	IPR011992;	sp|Q6DJ05|P2R3C_XENTR	Serine/threonine-protein phosphatase 2A regulatory subunit B'' subunit gamma	-	-	-	ko03015(mRNA surveillance pathway)	115.358	114.06	128	98	108.069	120	190.091	150.35	160.385	100.082	136	133.93	151.695	130	150.693	130.435	165.7	94.5726
Niben101Scf00082g08007	-	-	-	-	Unknown protein	-	-	-	-	1.02279	0.949023	0	0	0	2.77491	5	1.03926	0.93168	1.10467	6.23556	7.27481	1.79621	1	0	3.4861	4	1.08006
Niben101Scf00082g08019	GO:0004672;GO:0005524;GO:0006468;GO:0016772;	-	IPR011009;	sp|Q9FN94|RLK7_ARATH	Receptor-like protein kinase	GO:0006468//protein phosphorylation;	-	GO:0004672//protein kinase activity;GO:0005524//ATP binding;GO:0016772//transferase activity, transferring phosphorus-containing groups;	-	1.03926	6.52176	1.10467	15.5889	6.23556	8.08296	1	3	8.13424	26	12.9607	47.0485	19.9295	10.5349	31	7.44055	8.32474	7
Niben101Scf00082g08020	GO:0000166;GO:0000287;GO:0003924;GO:0005525;	-	IPR014100;IPR015349;IPR027417;	sp|B9IZ16|OBG_BACCQ	GTPase Obg	-	-	GO:0000166//nucleotide binding;GO:0000287//magnesium ion binding;GO:0003924//GTPase activity;GO:0005525//GTP binding;	-	33	26.7268	20	15.1208	20.4559	22.7765	38.9793	25	45.7062	22.1993	10	13.5104	35.4038	49.7099	58.1985	12.4711	15.2678	10
Niben101Scf00083g00009	GO:0004672;GO:0004674;GO:0005509;GO:0005524;GO:0006468;GO:0016772;	K13412	IPR011009;IPR011992;	AT4G04720.1	calcium-dependent protein kinase 21 LENGTH=531	GO:0006468//protein phosphorylation;	-	GO:0004672//protein kinase activity;GO:0004674//protein serine/threonine kinase activity;GO:0005509//calcium ion binding;GO:0005524//ATP binding;GO:0016772//transferase activity, transferring phosphorus-containing groups;	ko04626(Plant-pathogen interaction)	1002	1413.7	1075.74	608	796.073	511.492	1387.46	889.606	906.234	101.486	161	163	758.809	639	720.4	391.73	318.872	338.172
Niben101Scf00083g01001	-	-	-	sp|Q3KLM3|SYFB_CHLTA	Phenylalanine--tRNA ligase beta subunit	-	-	-	-	107.044	101.847	54.7845	28	43	88.3146	168	178.21	233.197	25.6236	31.6048	25	347.58	317.265	402	81.0622	60.5592	79.5359
Niben101Scf00083g01002	-	-	-	-	Unknown protein	-	-	-	-	16.2009	14.3191	19.9295	7.37446	8	17.007	18.4994	29	21.8244	4.6584	4.41866	3.11778	11.4319	10.7773	14	6	11.6203	7
Niben101Scf00083g02012	-	K12184	IPR007143;	sp|Q9S9T7|VP282_ARATH	Vacuolar protein sorting-associated protein 28 homolog 2	-	-	-	ko04144(Endocytosis)	412	421.939	340.995	420.877	477.02	544.572	363.733	649	556	578.693	872	327.258	571.741	396.691	588.904	1083	1031.05	683.553
Niben101Scf00083g02013	-	-	IPR000825;	ref|WP_008236070.1|	Iron-sulfur cluster assembly protein SufB [Richelia intracellularis] emb|CCH68427.1| Iron-sulfur cluster assembly protein SufB [Richelia intracellularis HH01]	-	-	-	-	372	157	168.495	70	141.488	150.35	362.527	348.707	417	71.2166	66.5979	107	499.884	531.989	677.16	248.383	233.833	198.482
Niben101Scf00083g02014	GO:0000166;GO:0003676;	-	IPR012677;	sp|Q9FXA2|PABP8_ARATH	Polyadenylate-binding protein 8	-	-	GO:0000166//nucleotide binding;GO:0003676//nucleic acid binding;	-	829.1	844	797.201	770.501	982	898.959	932.611	1077.05	1055.89	613.163	803.806	618	913	865.716	784	1022.82	967.562	869.305
Niben101Scf00083g04009	-	K01963	IPR029045;	sp|P31562|ACCD_CUSRE	Acetyl-coenzyme A carboxylase carboxyl transferase subunit beta	-	-	-	ko00640(Propanoate metabolism);ko00620(Pyruvate metabolism);ko00061(Fatty acid biosynthesis)	3.314	0	1.03926	0.898107	0	0	0	0	0	1.02279	0	2.10699	1	1.06294	0	2	0	1.86336
Niben101Scf00083g04018	-	-	IPR005651;	sp|A7ZK06|YCAR_ECO24	UPF0434 protein YcaR	-	-	-	-	79	112.326	95.1197	70.2277	77.9586	93	98.853	80.4725	96	60.277	72.671	134.769	120.554	88.337	88.0145	97	83	79.0184
Niben101Scf00083g04026	GO:0003824;GO:0004722;GO:0006470;	K01102	IPR001932;IPR015655;	AT4G38520.1	Protein phosphatase 2C family protein LENGTH=400	GO:0006470//protein dephosphorylation;	-	GO:0003824//catalytic activity;GO:0004722//protein serine/threonine phosphatase activity;	-	339.464	318	361.662	117.392	188.898	239.03	470.784	337.688	367	63	106.907	72	309.977	331.385	369.17	151.703	162	110.545
Niben101Scf00083g04029	-	-	-	ref|NP_001068433.1|	product [Oryza sativa Japonica Group]	-	-	-	-	111.365	168	43	52.2916	68	160.929	35.7977	68.3296	200.164	8	8.50348	24.0492	213	200.577	212.423	6.62799	6.23556	8.31407
Niben101Scf00083g04032	GO:0005506;GO:0016491;GO:0016705;GO:0016706;GO:0031418;GO:0055114;	K00472	IPR005123;	sp|P54001|P4HA1_RAT	Prolyl 4-hydroxylase subunit alpha-1	GO:0055114//obsolete oxidation-reduction process;	-	GO:0005506//iron ion binding;GO:0016491//oxidoreductase activity;GO:0016705//oxidoreductase activity, acting on paired donors, with incorporation or reduction of molecular oxygen;GO:0016706//2-oxoglutarate-dependent dioxygenase activity;GO:0031418//L-ascorbic acid binding;	ko00330(Arginine and proline metabolism)	143.302	215.966	142	195.58	243.267	174	221.362	171.429	255.178	137.182	160.046	133.818	156	92	191.736	298	155.529	171.829
Niben101Scf00083g04033	GO:0005515;GO:0008270;	-	IPR013083;	sp|Q7L0R7|RNF44_HUMAN	RING finger protein 44	-	-	GO:0005515//protein binding;GO:0008270//zinc ion binding;	-	80.1245	150.234	70.6696	63.3948	44.9053	63	48	153.389	119	18.361	7.15955	15.1844	68.4772	91	122.238	8.32474	24	15.5889
Niben101Scf00083g04034	GO:0004190;GO:0006508;	-	IPR001461;IPR021109;	AT2G17760.1	Eukaryotic aspartyl protease family protein LENGTH=513	GO:0006508//proteolysis;	-	GO:0004190//aspartic-type endopeptidase activity;	-	10.4583	3	10.8006	3.06838	5.69414	3.16048	47	21.2587	7.39977	6	8.31407	6.52176	16.57	4.15704	11.4319	8.98107	7	3
Niben101Scf00083g04049	-	-	-	-	Unknown protein	-	-	-	-	0	2.77491	3	4.15704	3.72672	0	7.27481	0	0	5	9	5.81017	0	0	2.04559	27.5217	17.9094	9
Niben101Scf00085g00009	-	K18156	IPR019165;	sp|P0CQ26|ATP23_CRYNJ	Mitochondrial inner membrane protease ATP23	-	-	-	-	187.067	169.742	253	203	238.217	207	105.846	204.559	143.302	89.5471	138	227.468	114.696	124	112.24	86.6462	97.2105	61.3163
Niben101Scf00085g01007	GO:0003735;GO:0005622;GO:0005840;GO:0006414;	K02943	IPR001813;	sp|P41099|RLA2_PARAR	60S acidic ribosomal protein P2	GO:0006414//translational elongation;	GO:0005622//intracellular anatomical structure;GO:0005840//ribosome;	GO:0003735//structural constituent of ribosome;	ko03010(Ribosome)	562.536	644.386	786.961	661	814.208	762.176	880	751.384	808.698	1090.3	1391.57	1559.93	618.796	534	620	1303.8	1015	1110.3
Niben101Scf00085g01014	-	K10798	IPR001357;	sp|Q9SWB4|PARP3_SOYBN	Poly [ADP-ribose] polymerase 3	-	-	-	ko03410(Base excision repair)	0	0	0	0	0	0	1	0	0	2	5.4003	0	3.79609	0	1	0	0	0
Niben101Scf00085g01019	-	-	IPR029058;	AT3G44510.2	alpha/beta-Hydrolases superfamily protein LENGTH=325	-	-	-	-	272	266.106	185	209.532	274.108	288.503	286.551	231	174.321	165.57	132	226.559	110.87	124.827	139.261	201.616	158.067	135
Niben101Scf00085g02001	-	-	IPR029058;	AT3G44510.2	alpha/beta-Hydrolases superfamily protein LENGTH=325	-	-	-	-	116	53.1468	47.1735	255	254.619	173.292	30.9306	46.7667	60.277	308.051	332	344	63.9119	52	61.5634	342.635	252.44	329.744
Niben101Scf00085g02008	-	-	-	-	Unknown protein	-	-	-	-	0	0	0	0	0	0	0	0	0	0.949023	9.48145	1	0	0	0	2.07852	1.86336	0
Niben101Scf00085g03003	GO:0004222;GO:0005524;GO:0006508;	K08955	IPR000642;IPR003959;IPR027417;	sp|B2UMY1|FTSH_AKKM8	ATP-dependent zinc metalloprotease FtsH	GO:0006508//proteolysis;	-	GO:0004222//metalloendopeptidase activity;GO:0005524//ATP binding;	-	223.572	192.285	255.287	195.95	169	220.028	407.912	325	314.896	102.485	138.083	139.261	224.48	176.029	243	186	180.115	151
Niben101Scf00085g03004	GO:0003980;GO:0006486;	K11718	IPR009448;	sp|Q0WL80|UGGG_ARATH	UDP-glucose:glycoprotein glucosyltransferase	GO:0006486//protein glycosylation;	-	GO:0003980//UDP-glucose:glycoprotein glucosyltransferase activity;	ko04141(Protein processing in endoplasmic reticulum)	0	0	0	1.10467	1.03926	0	1.79621	0	1	0	1	1.08006	0	0	1.05349	1	0	0
Niben101Scf00085g03006	GO:0003700;GO:0006355;GO:0043565;	K14432	IPR004827;	sp|Q9C5Q2|AI5L3_ARATH	ABSCISIC ACID-INSENSITIVE 5-like protein 3	GO:0006355//regulation of transcription, DNA-templated;	-	GO:0003700//DNA-binding transcription factor activity;GO:0043565//sequence-specific DNA binding;	ko04075(Plant hormone signal transduction)	1	2	3.4861	5	4.32024	3.06838	3.79609	0	0	1.06294	1.84994	1	0	0	1.10467	2.07852	2.07852	1.79621
Niben101Scf00085g03007	GO:0003723;GO:0003735;GO:0006412;GO:0015934;	K02865	IPR023673;IPR023674;IPR028364;	sp|P54050|RL1_METJA	50S ribosomal protein L1	GO:0006412//translation;	GO:0015934//large ribosomal subunit;	GO:0003723//RNA binding;GO:0003735//structural constituent of ribosome;	ko03010(Ribosome)	501.463	519	517.649	255.292	341	500.923	508.697	619.717	670.322	128.868	174.233	94	464	532.212	548	196.571	173.875	102.494
Niben101Scf00085g03010	-	-	IPR004314;IPR025521;	AT5G25950.1	Protein of Unknown Function (DUF239) LENGTH=432	-	-	-	-	0	0	0	0.898107	0	0	0	0	0	0	0.949023	0	0	1.06294	0	0	0	0
Niben101Scf00085g04001	-	K12125	-	sp|O82804|ELF3_ARATH	Protein EARLY FLOWERING 3	-	-	-	ko04712(Circadian rhythm - plant)	0	0	0	0	1.05349	0	0	0	0	0	0	1.10467	0	0	0	0	0	0
Niben101Scf00085g04002	-	K12194	IPR005024;	sp|Q9SZE4|VP322_ARATH	Vacuolar protein sorting-associated protein 32 homolog 2	-	-	-	ko04144(Endocytosis)	4.62485	10	5.1963	1.86336	4.41866	8.31407	8.31407	5.38864	6	2	4.64814	7	4.32024	5.11396	2.84707	7.37446	6	3.18881
Niben101Scf00085g04003	-	K12471	IPR008942;	sp|Q8VY07|EPN1_ARATH	Clathrin interactor EPSIN 1	-	-	-	ko04144(Endocytosis)	178.723	198	159	177.791	190	170.649	243.425	204.04	222.287	113	121.175	148.92	179	208.891	161.181	188.898	163.164	115.358
Niben101Scf00085g05010	-	K05759	IPR005455;	sp|Q9XF38|PROF_PYRCO	Profilin	-	-	-	-	1365.64	1113.54	912	519.775	762.176	1466	1310.51	1366.77	1716.65	260.854	473.902	362.835	1286	1319	1787.21	248	235.453	208.65
Niben101Scf00085g05022	GO:0004672;GO:0005524;GO:0006468;GO:0016772;	K02206	IPR011009;	sp|Q00536|CDK16_HUMAN	Cyclin-dependent kinase 16	GO:0006468//protein phosphorylation;	-	GO:0004672//protein kinase activity;GO:0005524//ATP binding;GO:0016772//transferase activity, transferring phosphorus-containing groups;	-	0	0	0	0	0	0	0	0	0	1.08006	0	0	0	0	0	0	0	0
Niben101Scf00085g05023	GO:0000160;GO:0004871;	K14490	IPR008207;	sp|Q9LU15|AHP4_ARATH	Histidine-containing phosphotransfer protein 4	GO:0000160//phosphorelay signal transduction system;	-	GO:0004871//obsolete signal transducer activity;	ko04075(Plant hormone signal transduction)	1.16203	2	5.4003	0	0.949023	2.10699	2	0	0	0	0	0	1.10467	1.03926	1.03926	1.79621	2	0
Niben101Scf00085g06010	GO:0016757;GO:0047262;	K13648	IPR002495;IPR029044;	emb|CAQ58617.1|	transferase, transferring glycosyl groups / unknown protein [Vitis vinifera]	-	-	GO:0016757//glycosyltransferase activity;GO:0047262//polygalacturonate 4-alpha-galacturonosyltransferase activity;	ko00520(Amino sugar and nucleotide sugar metabolism)	248.727	181.294	158	191.224	224.535	300.469	214.087	191.224	235.304	95	121	138.282	163	179.29	153.419	167.028	134.847	125
Niben101Scf00085g06011	GO:0005525;GO:0005622;GO:0006886;GO:0007264;GO:0015031;	K07952	IPR003579;IPR005225;IPR006689;IPR027417;	sp|Q9Y7Z2|ARF6_SCHPO	ADP-ribosylation factor 6	GO:0006886//intracellular protein transport;GO:0007264//small GTPase mediated signal transduction;GO:0015031//protein transport;	GO:0005622//intracellular anatomical structure;	GO:0005525//GTP binding;	-	171.478	136.512	194	140	180.115	181	304.577	299.678	285.656	86.3866	105	102.042	161.87	146	250.461	139.752	150.234	133.025
Niben101Scf00087g00005	GO:0003824;GO:0004722;GO:0006470;	K17499	IPR001932;IPR015655;	AT4G31860.1	Protein phosphatase 2C family protein LENGTH=357	GO:0006470//protein dephosphorylation;	-	GO:0003824//catalytic activity;GO:0004722//protein serine/threonine phosphatase activity;	-	247.516	194.55	191.736	292	291.244	248.817	260	275.404	203.106	138.083	126.79	125.75	166.15	199	198	194.06	118	118.807
Niben101Scf00087g00006	GO:0004335;GO:0005524;GO:0005737;GO:0006012;GO:0008152;GO:0016301;GO:0016773;GO:0046835;	K12446	IPR006206;	sp|A9WB97|GAL1_CHLAA	Galactokinase	GO:0006012//galactose metabolic process;GO:0008152//metabolic process;GO:0046835//carbohydrate phosphorylation;	GO:0005737//cytoplasm;	GO:0004335//galactokinase activity;GO:0005524//ATP binding;GO:0016301//kinase activity;GO:0016773//phosphotransferase activity, alcohol group as acceptor;	ko00520(Amino sugar and nucleotide sugar metabolism)	378.29	232.92	277.271	142.379	152.771	207.463	461	521	565.911	161	112.326	83.869	502.033	464.591	538	594.181	464.335	437
Niben101Scf00087g00009	-	-	IPR013024;	sp|Q9FIX2|AIG2L_ARATH	AIG2-like protein	-	-	-	-	29	31.3749	21	37.8021	57.2764	37.9609	27.3909	20	27.6363	32.374	25	36.3741	27.9504	17.6746	22.8637	50.9237	35.0262	34
Niben101Scf00087g01004	-	-	-	AT2G24395.1	chaperone protein dnaJ-related LENGTH=132	-	-	-	-	135	133.93	63.823	54	85.2193	176.087	78.4312	134.064	169.399	5.38864	12	8	239.379	211	244.094	11.2507	3.79609	5.26747
Niben101Scf00087g02009	GO:0004672;GO:0004674;GO:0005524;GO:0006468;GO:0016772;	-	IPR011009;IPR013320;	sp|Q9FN94|RLK7_ARATH	Receptor-like protein kinase	GO:0006468//protein phosphorylation;	-	GO:0004672//protein kinase activity;GO:0004674//protein serine/threonine kinase activity;GO:0005524//ATP binding;GO:0016772//transferase activity, transferring phosphorus-containing groups;	-	0	0	0	3	0	0	0	2.16012	0	4.74511	21.0699	9	1.06294	2.77491	2	16.6281	8.38512	7.73266
Niben101Scf00087g02010	GO:0005744;GO:0030150;	K17805	IPR005341;	sp|Q7S6S4|TIM16_NEUCR	Mitochondrial import inner membrane translocase subunit tim16	GO:0030150//protein import into mitochondrial matrix;	GO:0005744//TIM23 mitochondrial import inner membrane translocase complex;	-	-	57.2432	56.2536	82.565	122.205	92	132.867	94.347	91	85.2193	184.473	292.736	233.833	61.3163	59.2751	84	227	224.273	187
Niben101Scf00087g02011	GO:0004672;GO:0005524;GO:0006468;GO:0016772;	-	IPR011009;IPR013210;	sp|Q8S9L6|CRK29_ARATH	Cysteine-rich receptor-like protein kinase 29	GO:0006468//protein phosphorylation;	-	GO:0004672//protein kinase activity;GO:0005524//ATP binding;GO:0016772//transferase activity, transferring phosphorus-containing groups;	-	0	0	0	0	0	0	0	0	0	0	1	0	0	0	0	1	4.25174	0.924971
Niben101Scf00087g03012	GO:0003824;GO:0008460;GO:0009225;GO:0050662;	K12450	IPR001509;IPR005888;IPR029903;	sp|A0R5C5|GALE_MYCS2	UDP-glucose 4-epimerase	GO:0009225//nucleotide-sugar metabolic process;	-	GO:0003824//catalytic activity;GO:0008460//dTDP-glucose 4,6-dehydratase activity;GO:0050662//obsolete coenzyme binding;	ko00520(Amino sugar and nucleotide sugar metabolism)	9	7	8.13424	32	22.6813	12.2735	18.9805	3.16048	5	86.0977	77.6975	49	4.15704	0.93168	5.52333	45.7274	37.4133	40.4148
Niben101Scf00087g03023	GO:0005216;GO:0006811;GO:0016020;GO:0055085;	K05391	IPR005821;IPR014710;	AT2G24610.1	cyclic nucleotide-gated channel 14 LENGTH=726	GO:0006811//ion transport;GO:0055085//transmembrane transport;	GO:0016020//membrane;	GO:0005216//ion channel activity;	ko04626(Plant-pathogen interaction)	167.506	126	197.706	100.822	92	106.004	276.709	220.933	157.967	76.9052	105.977	114	120	131.31	133	173.89	137.054	130.016
Niben101Scf00087g03024	-	K12896	IPR012677;	sp|O81127|RSZ21_ARATH	Serine/arginine-rich splicing factor RSZ21	-	-	-	ko03040(Spliceosome)	145.816	88.337	119.515	35.0262	54	99	196.384	128	164.169	23.5242	36.0629	27.3909	141	110.545	124.871	27	27.0207	25.1554
Niben101Scf00087g04004	GO:0006486;GO:0008378;GO:0016020;	-	IPR002659;IPR025298;	sp|Q6NQB7|B3GT7_ARATH	Beta-1,3-galactosyltransferase 7	GO:0006486//protein glycosylation;	GO:0016020//membrane;	GO:0008378//galactosyltransferase activity;	-	1098	1625.49	1001.31	643.437	1290.53	988	1231.94	1208.01	1043	306.581	172.361	182.27	402.193	355.427	372.714	194	166	138.282
Niben101Scf00087g05001	GO:0006511;GO:0036459;	K11855	IPR002893;IPR028889;	sp|Q9FPS4|UBP23_ARATH	Ubiquitin carboxyl-terminal hydrolase 23	GO:0006511//ubiquitin-dependent protein catabolic process;	-	-	-	357.964	465	359.584	301.864	281.69	292.032	560.161	357.447	468	85	118.528	86	331.578	302.747	295.146	106.403	81	90.3495
Niben101Scf00087g05003	GO:0004601;GO:0006979;GO:0020037;GO:0055114;	K00430	IPR010255;	sp|Q96518|PER16_ARATH	Peroxidase 16	GO:0006979//response to oxidative stress;GO:0055114//obsolete oxidation-reduction process;	-	GO:0004601//peroxidase activity;GO:0020037//heme binding;	ko00940(Phenylpropanoid biosynthesis)	2.69432	4	1	0	0	0	4.09117	1.89805	7.37446	0	1.06294	0	17	4.15704	7.45344	0	0	0
Niben101Scf00087g06002	-	-	IPR012417;	gb|KEH25033.1|	plant calmodulin-binding-like protein [Medicago truncatula]	-	-	-	-	15.1844	20.0164	44	10.6294	15.7245	6	125.75	18.6336	28.7213	7.27481	7.27481	13.4716	16	17	23.2407	25	23.7613	16.3647
Niben101Scf00087g06008	GO:0003824;GO:0004655;GO:0033014;GO:0046872;	K01698	IPR001731;IPR013785;	sp|Q8KCJ0|HEM2_CHLTE	Delta-aminolevulinic acid dehydratase	GO:0033014//tetrapyrrole biosynthetic process;	-	GO:0003824//catalytic activity;GO:0004655//porphobilinogen synthase activity;GO:0046872//metal ion binding;	ko00860(Porphyrin metabolism)	1164.6	2049.15	827.25	998.728	1329.2	1685	883	1184.11	1137	1499.12	1690.68	1556.4	1278.94	1138	1120.33	1723.22	1869	2025.52
Niben101Scf00087g06009	-	-	IPR000644;IPR002885;	sp|Q3EDF8|PPR28_ARATH	Pentatricopeptide repeat-containing protein	-	-	-	-	343.962	336	150.128	194.331	311.279	328.69	231	265.734	258.992	749	930.137	841.307	447.389	385.565	401.154	656.516	584	663
Niben101Scf00087g07001	-	-	IPR001283;	sp|A6MFK9|CRVP_DEMVE	Cysteine-rich venom protein	-	-	-	-	0	0	0	0	0	0	0	0	0	0	0	0	0	0	0	0.949023	0	0
Niben101Scf00087g09002	GO:0000155;GO:0000160;GO:0004871;GO:0007165;GO:0016020;GO:0016310;GO:0016772;	-	IPR003594;IPR004358;IPR005467;IPR009082;IPR011006;	AT5G10720.1	histidine kinase 5 LENGTH=922	GO:0000160//phosphorelay signal transduction system;GO:0007165//signal transduction;GO:0016310//phosphorylation;	GO:0016020//membrane;	GO:0000155//phosphorelay sensor kinase activity;GO:0004871//obsolete signal transducer activity;GO:0016772//transferase activity, transferring phosphorus-containing groups;	-	0	0.898107	2	3	0	0	1.08006	0	1.89805	0	1	1.06294	0	1	5.1963	0	4.41866	1.03926
Niben101Scf00087g09003	GO:0000166;GO:0003676;	K12900	IPR012677;	sp|O75494|SRS10_HUMAN	Serine/arginine-rich splicing factor 10	-	-	GO:0000166//nucleotide binding;GO:0003676//nucleic acid binding;	ko03040(Spliceosome)	0	0	0	0	0	0	1	0	0.93168	0	0	0	0	0	1	0	0	0
Niben101Scf00087g10017	-	-	IPR002885;IPR011990;	sp|Q9ZVX5|PP156_ARATH	Pentatricopeptide repeat-containing protein	-	-	-	-	94.5726	91.3046	98.3152	140.3	160.046	95.1993	69	91	141.768	97	109.086	102.279	112.934	128.526	127	86.0977	95.272	102
Niben101Scf00088g00002	GO:0003824;GO:0008152;	K14760	IPR000873;IPR025110;	sp|P23971|MENE_BACSU	2-succinylbenzoate--CoA ligase	GO:0008152//metabolic process;	-	GO:0003824//catalytic activity;	ko00130(Ubiquinone and other terpenoid-quinone biosynthesis)	117	155.713	60	23.7613	58.2992	130.965	84.2796	111	155.189	31.449	24	24.9422	224.535	315.934	332.563	49.8844	50.294	43
Niben101Scf00088g00010	-	-	-	sp|Q5BQN5|WAP_SOLLC	WPP domain-associated protein	-	-	-	-	207	240.223	205.344	96	107.044	88.5096	334.714	245.265	228.637	25.147	42	35	142.93	131	168.489	54.208	47.4511	58.9957
Niben101Scf00088g01008	GO:0003677;GO:0003700;GO:0006355;GO:0016602;	K08064	IPR001289;	sp|Q84JP1|NFYA7_ARATH	Nuclear transcription factor Y subunit A-7	GO:0006355//regulation of transcription, DNA-templated;	GO:0016602//CCAAT-binding factor complex;	GO:0003677//DNA binding;GO:0003700//DNA-binding transcription factor activity;	-	318.013	301.385	220.036	316	357	289.347	212	299.177	280.245	164.181	243.357	230	1006.6	802.875	767	384.526	232.92	311.516
Niben101Scf00088g01009	-	-	IPR019371;	AT3G29130.2	FUNCTIONS IN: molecular_function unknown; INVOLVED IN: biological_process unknown; LOCATED IN: cellular_component unknown;	-	-	-	-	224.652	174.898	143.302	242.304	266	278.489	246.967	256	279.561	368.945	429.715	674.479	216.166	166.15	279	401	402.064	315
Niben101Scf00088g01010	-	K02975	IPR004977;	sp|P46301|RS25_SOLLC	40S ribosomal protein S25	-	-	-	ko03010(Ribosome)	124	122.633	113.665	124.827	118.476	151.732	141.901	159	140	133.634	174	139.328	172.852	78.7689	143.275	181	166.881	142.445
Niben101Scf00088g01011	GO:0003735;GO:0005622;GO:0005840;GO:0006412;GO:0019843;	K02887	IPR005813;	sp|Q1MMP4|RL20_RHIL3	50S ribosomal protein L20	GO:0006412//translation;	GO:0005622//intracellular anatomical structure;GO:0005840//ribosome;	GO:0003735//structural constituent of ribosome;GO:0019843//rRNA binding;	ko03010(Ribosome)	85	82	102.259	109	120.967	142.168	74.9728	79.0121	90	88.2236	108.222	148	69.6304	47.5157	81.7452	101.847	109.122	76.3391
Niben101Scf00088g01012	-	-	-	emb|CDX94052.1|	BnaC07g36860D [Brassica napus]	-	-	-	-	12.6419	7	0	30.524	26	23.903	0	6.62799	16.6281	206.813	243.387	104	41	55.7777	31	395.302	359	286.605
Niben101Scf00088g01018	GO:0030145;GO:0045735;	-	IPR001929;	sp|P92999|GL118_ARATH	Germin-like protein subfamily 1 member 18	-	-	GO:0030145//manganese ion binding;GO:0045735//nutrient reservoir activity;	-	0	0	0	0	0	0	0	0	0	4.09117	7.59218	3.16048	0	0	0	2	0	2.79504
Niben101Scf00089g00001	-	-	IPR018499;	sp|Q9M1E7|TET3_ARATH	Tetraspanin-3	-	-	-	-	414	249.494	154.442	113.883	104.296	293	138.182	153.545	202	68.5911	90.3729	121.513	134.064	164.203	152.678	46	39	32.537
Niben101Scf00089g02001	-	-	-	ref|XP_007022165.1|	Interactor of constitutive active rops 1 isoform 2 [Theobroma cacao] gb|EOY13690.1| Interactor of constitutive active rops 1 isoform 2 [Theobroma cacao]	-	-	-	-	92.4971	202	71.7089	17.7019	49.7099	78.9837	112.24	69.1542	170	9	12.7824	11	108.006	87.9602	100.596	6.32097	7	11.6923
Niben101Scf00089g02006	GO:0003677;GO:0006355;	-	IPR003851;	AT2G28510.1	Dof-type zinc finger DNA-binding family protein LENGTH=288	GO:0006355//regulation of transcription, DNA-templated;	-	GO:0003677//DNA binding;	-	142.799	93	144	34.861	52	92.8851	263.88	308.432	441.414	13	5.31468	13.8746	321	527.944	536.648	27.6166	22.8637	19.7459
Niben101Scf00089g04004	GO:0003677;GO:0006355;	-	IPR003851;	AT2G28510.1	Dof-type zinc finger DNA-binding family protein LENGTH=288	GO:0006355//regulation of transcription, DNA-templated;	-	GO:0003677//DNA binding;	-	147.098	23.1769	41	5.31468	6.4748	44	30.1385	97.8264	222.038	0	0	0.898107	324	547	503.161	4	9.72054	5.11396
Niben101Scf00090g01010	GO:0005509;GO:0005544;	K17095	IPR001464;	sp|Q9C9X3|ANXD5_ARATH	Annexin D5	-	-	GO:0005509//calcium ion binding;GO:0005544//calcium-dependent phospholipid binding;	-	762.114	599.833	888.567	342.956	382.594	450	2089	1492.05	1394	174.97	199.445	150.895	1061.92	876	1027.86	282.116	253	299.307
Niben101Scf00090g01014	-	K13174	IPR019163;	sp|F4K4J0|THO5B_ARATH	THO complex subunit 5B	-	-	-	ko03013(Nucleocytoplasmic transport)	790.184	706	833.806	495.032	519.115	626.829	1012	1035.3	883.347	239	298.267	272.982	684.892	584.064	805.426	449.952	399	457
Niben101Scf00090g02002	GO:0003700;GO:0006355;GO:0043565;	K14432	IPR004827;	AT1G49720.2	abscisic acid responsive element-binding factor 1 LENGTH=403	GO:0006355//regulation of transcription, DNA-templated;	-	GO:0003700//DNA-binding transcription factor activity;GO:0043565//sequence-specific DNA binding;	ko04075(Plant hormone signal transduction)	38.2657	29.5991	43	36.3741	20.497	36.4539	50.9237	37.4133	33.23	35	31	55.7777	79	116.646	107.393	92.0552	90.6005	63
Niben101Scf00090g02003	GO:0005507;GO:0009308;GO:0048038;	-	IPR015801;IPR021602;	sp|Q5D869|NRPE1_ARATH	DNA-directed RNA polymerase V subunit 1	GO:0009308//amine metabolic process;	-	GO:0005507//copper ion binding;GO:0048038//quinone binding;	-	218.244	192.195	139	58	90.6387	168	176.05	206.604	191.703	31.6048	38	57.3985	174.819	277	304.503	68.9443	88.3732	55.0807
Niben101Scf00090g03004	-	K05387	-	sp|Q7XJL2|GLR31_ARATH	Glutamate receptor 3.1	-	-	-	-	127.849	248.644	335.011	45	47.8321	38.8488	371	161.085	102.485	16.57	17.6674	9.35333	66.4599	69	124	27.8888	29	25.9214
Niben101Scf00090g04005	GO:0004672;GO:0004674;GO:0005524;GO:0006468;GO:0016772;	K08790	IPR000961;IPR011009;	AT5G09890.2	Protein kinase family protein LENGTH=516	GO:0006468//protein phosphorylation;	-	GO:0004672//protein kinase activity;GO:0004674//protein serine/threonine kinase activity;GO:0005524//ATP binding;GO:0016772//transferase activity, transferring phosphorus-containing groups;	-	152.771	39.1305	40.8726	40.5311	18.7067	26.9432	58	76	138.282	7	10.8006	11.2507	237.256	467.752	356	15.944	6.4748	22
Niben101Scf00090g04014	-	-	-	ref|XP_007017230.1|	Cold regulated gene 27, putative isoform 3 [Theobroma cacao] gb|EOY14455.1| Cold regulated gene 27, putative isoform 3 [Theobroma cacao]	-	-	-	-	144	133.634	77	164.169	205.581	197.397	244.411	177	166.881	30.524	30	41.5704	0.93168	0	1.03926	24.9422	14.3697	15
Niben101Scf00090g05004	-	K18588	IPR005031;IPR023393;	sp|Q6PBN4|CQ10X_DANRE	Coenzyme Q-binding protein COQ10 homolog, mitochondrial	-	-	-	-	153	125.426	123.946	90	92.4941	120.187	171.223	115.358	119.515	26.9432	43	48	67.398	73	102.606	75.6866	63.5845	69.5307
Niben101Scf00090g05006	-	-	-	-	Unknown protein	-	-	-	-	92.4941	93.5333	129.327	85	69	110.393	125	65.8836	86.9374	27.5217	35.8188	30	74.4055	83.2474	119	81.0622	63.3542	62.9659
Niben101Scf00090g07001	GO:0005506;GO:0016705;GO:0020037;GO:0055114;	K09843	IPR001128;	AT5G05690.1	Cytochrome P450 superfamily protein LENGTH=472	GO:0055114//obsolete oxidation-reduction process;	-	GO:0005506//iron ion binding;GO:0016705//oxidoreductase activity, acting on paired donors, with incorporation or reduction of molecular oxygen;GO:0020037//heme binding;	ko00906(Carotenoid biosynthesis)	320.778	72.6183	94.9023	8.42796	18	87.1607	293.216	251	247.344	0	0	3.11778	337.759	364.631	581	19	10.4583	15
Niben101Scf00090g07002	-	-	IPR003033;	sp|P97852|DHB4_RAT	Peroxisomal multifunctional enzyme type 2	-	-	-	-	164	96.6511	87.5779	26.512	76.9052	102.887	76.3391	143	93	18.5926	45	38.8822	109.439	133.812	191.736	38	53.1468	36.0739
Niben101Scf00090g07003	GO:0006662;GO:0015035;GO:0045454;	-	IPR005746;IPR012336;	AT1G07700.3	Thioredoxin superfamily protein LENGTH=217	GO:0006662//glycerol ether metabolic process;GO:0045454//cell redox homeostasis;	-	GO:0015035//protein-disulfide reductase activity;	-	461	335	309.101	72	166.329	380.479	355.883	437.2	516	28.6992	28.6741	32	823.093	802.176	1199.67	83.1407	68.5911	68.2561
Niben101Scf00090g08010	GO:0003824;GO:0004556;GO:0005509;GO:0005975;GO:0043169;	K01176	IPR015902;	sp|P17859|AMYA_VIGMU	Alpha-amylase	GO:0005975//carbohydrate metabolic process;	-	GO:0003824//catalytic activity;GO:0004556//alpha-amylase activity;GO:0005509//calcium ion binding;GO:0043169//cation binding;	ko00500(Starch and sucrose metabolism)	17.9094	5	4.25174	8.32474	6	14.5496	19.5653	24.3026	17.6674	30.1385	16.1659	21	60	48.8055	48	37.8021	53.1852	44.6041
Niben101Scf00090g08011	-	-	IPR013863;IPR015943;	AT4G33400.1	Vacuolar import/degradation, Vid27-related protein LENGTH=645	-	-	-	-	25.4073	44.6881	28.06	20.6565	32	31	32.537	35	54.003	47.0485	17.0824	79.0121	47	34.0139	34.2239	75	72.7481	68.0126
Niben101Scf00090g08013	-	-	IPR008545;	sp|O48724|WEB1_ARATH	Protein WEAK CHLOROPLAST MOVEMENT UNDER BLUE LIGHT 1	-	-	-	-	76	54.003	49.094	77.8198	138.008	80	53.1468	22.1993	25	99.7689	144.41	68.4892	116.397	88.337	73.6448	75	69	73.2082
Niben101Scf00090g10001	GO:0005739;GO:0006461;	K07555	IPR010591;	sp|Q811I0|ATPF1_MOUSE	ATP synthase mitochondrial F1 complex assembly factor 1	-	GO:0005739//mitochondrion;	-	-	156.32	139	168.36	116.46	188.898	170.439	248.383	159.863	195	105	139.444	100	156.609	127.849	140.455	175.934	139	126.489
Niben101Scf00090g10002	-	-	-	-	Unknown protein	-	-	-	-	32.3318	28	39	34.861	28	42.1223	60.3448	49.3492	44.2468	23	28.6992	49.9484	39	30.1385	30.7454	27.6166	32.217	27.0207
Niben101Scf00090g11001	-	-	-	emb|CDY71261.1|	BnaCnng72080D, partial [Brassica napus]	-	-	-	-	4.74511	4.21398	10	7.44055	9.24971	10	7.27481	0.93168	5.52333	140.3	153.81	160.761	5	2	6.97221	96	56.1631	73.6411
Niben101Scf00090g11004	-	K17964	IPR002885;	sp|Q9ZVX5|PP156_ARATH	Pentatricopeptide repeat-containing protein	-	-	-	-	3.72672	7.73266	2.07852	11.4319	4.49053	9	10	3.4861	0	16.2009	23.5242	24.6746	2.10699	4	8.50348	18.4994	24	21.8244
Niben101Scf00090g12004	GO:0016757;	K00750	IPR002495;IPR029044;	sp|O15488|GLYG2_HUMAN	Glycogenin-2	-	-	GO:0016757//glycosyltransferase activity;	ko00500(Starch and sucrose metabolism)	0	0	0	0	0	0	0	0	0	8	9.35333	1.86336	1.10467	0	0	9.87918	10	19
Niben101Scf00090g13005	-	-	-	-	Unknown protein	-	-	-	-	0	0	0	0	0	0	0	0	0	0	0	0	0	0	0	0.949023	0	0
Niben101Scf00090g13008	GO:0016757;	-	IPR002495;IPR029044;	sp|O15488|GLYG2_HUMAN	Glycogenin-2	-	-	GO:0016757//glycosyltransferase activity;	-	24.9422	21.5546	22	18	25.5648	18	29.1616	18.4103	15.1844	4.21398	0	3.18881	4.62485	20	24.9422	2.79504	8.83732	1.03926
Niben101Scf00090g13009	-	-	-	ref|XP_002535856.1|	conserved hypothetical protein [Ricinus communis] gb|EEF26527.1| conserved hypothetical protein [Ricinus communis]	-	-	-	-	0	5.69414	1.05349	1	2.12587	2.77491	1	1.03926	0.93168	0	1.03926	0	1.79621	0	1	0	0	0
Niben101Scf00090g13016	-	-	-	-	Unknown protein	-	-	-	-	31.1778	45.6523	39.7679	32.217	75.8659	53.8864	59	71	84.8285	9	15.1208	16.3647	37.9609	35.8188	38	15.944	12.9496	7
Niben101Scf00090g13017	-	-	IPR007378;	AT4G33350.1	Tic22-like family protein LENGTH=268	-	-	-	-	347	403.226	247	243.013	316.043	367.272	407.702	508	515.524	70.2978	97	98.7296	321.43	323.667	412.586	81.0622	75.441	76
Niben101Scf00090g14001	GO:0000166;GO:0003735;GO:0005622;GO:0005840;GO:0006412;	K02974	IPR001976;IPR012677;	sp|Q9SS17|RS241_ARATH	40S ribosomal protein S24-1	GO:0006412//translation;	GO:0005622//intracellular anatomical structure;GO:0005840//ribosome;	GO:0000166//nucleotide binding;GO:0003735//structural constituent of ribosome;	ko03010(Ribosome)	0	0	0.924971	1	0	0	1.10467	3.11778	2.07852	0	0	1	0	0	0	0	0	1.05349
Niben101Scf00090g14005	-	-	IPR011992;	sp|A2CEQ0|SCM2B_DANRE	Calcium-binding mitochondrial carrier protein SCaMC-2-B	-	-	-	-	1.03926	1.03926	0	1	2	1.16203	0	0	0	0.949023	0	1	0	0	0	0	0	1.10467
Niben101Scf00090t13013	-	-	-	-	-	-	-	-	-	0	1.02279	0	0	0	0	0	1	3.11778	0	0	0	0	0	0	0	0	0
Niben101Scf00091g00002	GO:0004672;GO:0005515;GO:0005524;GO:0006468;GO:0016772;	-	IPR001611;IPR003591;IPR011009;IPR013320;	sp|Q9LIG2|RLK6_ARATH	Receptor-like protein kinase	GO:0006468//protein phosphorylation;	-	GO:0004672//protein kinase activity;GO:0005515//protein binding;GO:0005524//ATP binding;GO:0016772//transferase activity, transferring phosphorus-containing groups;	-	309	276.443	199.379	135.874	168.36	161.085	237.998	219	250	96.4489	75	74.5241	154.442	108.189	145.382	139	111.608	81.3974
Niben101Scf00091g00013	GO:0006810;GO:0008565;GO:0015031;GO:0030123;	K12399	IPR016635;	sp|Q8VZ37|AP3S_ARATH	AP-3 complex subunit sigma	GO:0006810//transport;GO:0015031//protein transport;	GO:0030123//AP-3 adaptor complex;	GO:0008565//obsolete protein transporter activity;	-	101	106	122.014	85	103.686	106.37	136.659	131.687	116	107.356	147.995	89	57.1593	56.8325	90.5825	108.083	86.2585	81.7277
Niben101Scf00091g00017	GO:0003690;GO:0005739;GO:0006355;	K15032	IPR003690;	AT2G21710.1	Mitochondrial transcription termination factor family protein LENGTH=641	GO:0006355//regulation of transcription, DNA-templated;	GO:0005739//mitochondrion;	GO:0003690//double-stranded DNA binding;	-	32.6583	76	21.2587	124.871	163	109.122	26.087	38.6633	24.9422	107.044	113.161	84	29	24.4027	18	91.8051	104.325	83.514
Niben101Scf00091g01023	GO:0016020;GO:0016651;GO:0051536;GO:0051539;GO:0055114;	K03941	IPR010226;IPR017896;	sp|A8EZZ7|NUOI_RICCK	NADH-quinone oxidoreductase subunit I	GO:0055114//obsolete oxidation-reduction process;	GO:0016020//membrane;	GO:0016651//oxidoreductase activity, acting on NAD(P)H;GO:0051536//iron-sulfur cluster binding;GO:0051539//4 iron, 4 sulfur cluster binding;	ko00190(Oxidative phosphorylation)	1810.55	1399.88	1457.04	983.427	1189	1515	1687.27	1606	1752.94	679.134	728.849	929.182	1230	1282.96	1263.51	788	702.539	660.561
Niben101Scf00091g01025	GO:0004672;GO:0004674;GO:0005524;GO:0006468;GO:0016772;	-	IPR011009;	sp|Q9LIG2|RLK6_ARATH	Receptor-like protein kinase	GO:0006468//protein phosphorylation;	-	GO:0004672//protein kinase activity;GO:0004674//protein serine/threonine kinase activity;GO:0005524//ATP binding;GO:0016772//transferase activity, transferring phosphorus-containing groups;	-	88	115.566	61.3676	49.3492	48.4608	62	56.3356	85.0973	104	87.2978	111.802	55.2333	113.279	116.397	110.467	61	60	73.2082
Niben101Scf00091g01028	-	-	-	-	Unknown protein	-	-	-	-	8.32474	16	10.3926	4.6584	6.62799	29.0993	12.4711	16.1659	16	12	24.4027	13	15.1208	11.2507	12.3373	13.6954	13	11.6923
Niben101Scf00094g00006	-	-	-	emb|CDY38155.1|	BnaA07g02280D [Brassica napus]	-	-	-	-	0	3	4	0	1	5.4003	2.04559	4.74511	7.37446	0	2.12587	0	2	3.11778	2.79504	1.10467	1.03926	0
Niben101Scf00094g00007	-	K11490	IPR009378;	sp|Q9LUR0|CNDH2_ARATH	Condensin-2 complex subunit H2	-	-	-	-	20.8785	48.4608	18	12.7552	24.9742	27	21.8244	15.8386	47.5006	41.5704	51.963	68.2561	22	18	33.699	46	68.0438	58.2992
Niben101Scf00094g00008	GO:0004857;GO:0005618;GO:0030599;GO:0042545;	K01051	IPR006501;IPR011050;	sp|Q42920|PME_MEDSA	Pectinesterase/pectinesterase inhibitor	GO:0042545//cell wall modification;	GO:0005618//cell wall;	GO:0004857//enzyme inhibitor activity;GO:0030599//pectinesterase activity;	ko00040(Pentose and glucuronate interconversions)	0	1.10467	1.03926	4.15704	2.69432	2	0	0	3	0	0	0	4.21398	1	3.18881	1.84994	0	0
Niben101Scf00094g00009	GO:0006952;GO:0009607;	-	IPR000916;IPR023393;IPR024949;	sp|P43177|BEV1D_BETPN	Major pollen allergen Bet v 1-D/H	GO:0006952//defense response;GO:0009607//response to biotic stimulus;	-	-	-	777.401	923	790.604	372.296	725.053	852.277	1452	1050.18	530.933	74	207.852	97.8264	627.45	511.316	761.777	45.8034	58	31
Niben101Scf00094g01002	-	-	IPR008598;IPR027935;	sp|Q9FJ17|DI197_ARATH	Protein DEHYDRATION-INDUCED 19 homolog 7	-	-	-	-	186.014	172.045	207	246.304	280.436	276.166	316.974	246.304	198.482	605	694	869.202	123	205.211	261.835	486.849	474.073	436
Niben101Scf00094g02004	GO:0003700;GO:0006355;GO:0008270;GO:0043565;	-	IPR013088;	sp|Q8LG10|GAT15_ARATH	GATA transcription factor 15	GO:0006355//regulation of transcription, DNA-templated;	-	GO:0003700//DNA-binding transcription factor activity;GO:0008270//zinc ion binding;GO:0043565//sequence-specific DNA binding;	-	42.6096	54.7845	78	93	105.745	103	57.2432	36.8205	49.3492	223.341	249	317.818	21.2743	45	43.6489	113.665	149.13	154.85
Niben101Scf00094g03003	-	K17790	IPR003397;	sp|A2RVP7|TI221_ARATH	Mitochondrial import inner membrane translocase subunit TIM22-1	-	-	-	-	11.2507	7.59218	10.5349	11	13.8182	23.1243	14	13.5104	11.1802	4.41866	20.7852	19.7459	8.98107	8	6	16.2685	7	9.72054
Niben101Scf00094g03004	GO:0003824;GO:0008152;	-	IPR000873;IPR025110;	AT1G62940.1	acyl-CoA synthetase 5 LENGTH=542	GO:0008152//metabolic process;	-	GO:0003824//catalytic activity;	-	0	1.86336	1.10467	0	0	0	5	1	2.32407	20	17.281	10.2279	0.949023	2.10699	2	13.8182	12.0246	11
Niben101Scf00095g00003	-	-	-	tpg|DAA45095.1|	TPA: hypothetical protein ZEAMMB73_908552 [Zea mays]	-	-	-	-	12	8.13424	4	5.4003	16.3647	8.5412	7.37446	14	8.50348	42.5487	28	94.5726	15.8386	16.57	11.4319	88.337	114.958	108
Niben101Scf00095g02005	GO:0003868;GO:0009072;GO:0016701;GO:0055114;	K00457	IPR005956;IPR029068;	sp|O23920|HPPD_DAUCA	4-hydroxyphenylpyruvate dioxygenase	GO:0009072//aromatic amino acid family metabolic process;GO:0055114//obsolete oxidation-reduction process;	-	GO:0003868//4-hydroxyphenylpyruvate dioxygenase activity;GO:0016701//oxidoreductase activity, acting on single donors with incorporation of molecular oxygen;	ko00360(Phenylalanine metabolism);ko00350(Tyrosine metabolism);ko00130(Ubiquinone and other terpenoid-quinone biosynthesis)	432	297.622	232.168	188	271.247	249.69	534.658	326.327	312.817	318.828	390	323	672.818	627	682.598	340.59	282.809	289.711
Niben101Scf00095g05001	-	-	IPR015915;	sp|Q9P2G9|KLHL8_HUMAN	Kelch-like protein 8	-	-	-	-	194.341	93.5333	113.161	114	106	196.384	210	365.06	430.596	272.369	220.18	184	460.251	497.634	478	282.679	188.199	192.212
Niben101Scf00095g07001	-	-	IPR004263;	AT5G03795.1	Exostosin family protein LENGTH=518	-	-	-	-	8.64048	3.06838	2.84707	4.21398	9	3.18881	17.5744	1	2.07852	203.106	459.541	352.309	4.15704	8.08296	3	324	403.226	369
Niben101Scf00095g08004	-	-	IPR009060;IPR009719;	ref|XP_007049403.1|	Cell wall protein AWA1 isoform 1 [Theobroma cacao] gb|EOX93560.1| Cell wall protein AWA1 isoform 1 [Theobroma cacao]	-	-	-	-	703	769.052	703.418	760.01	715.01	651.616	861.284	687	645	323.046	449	303.497	499.123	377.711	494.089	731	724.922	583.657
Niben101Scf00095g08008	GO:0005515;GO:0008270;	K16285	IPR013083;	sp|Q7L0R7|RNF44_HUMAN	RING finger protein 44	-	-	GO:0005515//protein binding;GO:0008270//zinc ion binding;	-	46	29	53.4536	59	81.0045	93.0741	98.6983	44.2468	61	44.6433	57.3482	43	34.2956	19.5653	53.0239	55.0807	44.6881	47.5997
Niben101Scf00096g00004	GO:0003677;GO:0003682;	-	IPR009057;IPR025756;	sp|Q9SAK5|APL_ARATH	Myb family transcription factor APL	-	-	GO:0003677//DNA binding;GO:0003682//chromatin binding;	-	6.32097	3	2.12587	11.0996	4	3.11778	0.93168	13.256	9.35333	97.6904	28.7394	72	12	4.64814	6	70.2039	76.7094	100.596
Niben101Scf00096g00005	-	-	-	emb|CDX67716.1|	BnaA07g17560D [Brassica napus]	-	-	-	-	17.6746	18.7067	14.5496	9.87918	12	20	52.2916	23	14.0408	10.2279	17.0824	11.5884	5	3.18881	13.8746	8	16.6281	8.38512
Niben101Scf00096g01006	-	K07466	IPR012340;	gb|KEH26596.1|	animal RPA1 domain protein [Medicago truncatula]	-	-	-	ko03440(Homologous recombination);ko03430(Mismatch repair);ko03420(Nucleotide excision repair);ko03030(DNA replication)	0	0	0	0	0	0	0	0	0	0	0	0	0	0	0	0	1	1.16203
Niben101Scf00096g01009	-	-	-	ref|NP_001062209.1|	product [Oryza sativa Japonica Group]	-	-	-	-	52.7233	56	71.7089	65.2176	88.3732	83.1407	59.2378	26.9432	75	43	91.8007	76	72.364	59.322	60.7374	71.6376	58	59.5244
Niben101Scf00096g02003	GO:0000166;GO:0003676;GO:0003723;GO:0005524;GO:0015833;GO:0046872;	-	IPR000571;IPR004087;IPR013563;	sp|Q7F8R0|C3H14_ORYSJ	Zinc finger CCCH domain-containing protein 14	GO:0015833//peptide transport;	-	GO:0000166//nucleotide binding;GO:0003676//nucleic acid binding;GO:0003723//RNA binding;GO:0005524//ATP binding;GO:0046872//metal ion binding;	-	137.41	143	179	242.865	263	247.334	203.536	127.169	166.452	188	325.258	283.966	132	124.711	143.479	203.258	150.693	178.753
Niben101Scf00096g03007	-	-	IPR006843;	AT2G42130.4	Plastid-lipid associated protein PAP / fibrillin family protein LENGTH=299	-	-	-	-	368.221	251.785	277	145.622	233.093	404	233.833	280.436	345.76	63.3948	68.5911	62.8675	201	214	335.828	135	99.3655	92.0513
Niben101Scf00096g04003	-	-	IPR012336;	sp|Q9H2J4|PDCL3_HUMAN	Phosducin-like protein 3	-	-	-	-	0.93168	4.41866	2.07852	0	0	1	0	0	0	0	0	0	1.05349	1	0	0	0	0
Niben101Scf00096g04005	GO:0004672;GO:0004674;GO:0005524;GO:0006468;GO:0016772;GO:0030246;	-	IPR011009;IPR013320;	AT2G37710.1	receptor lectin kinase LENGTH=675	GO:0006468//protein phosphorylation;	-	GO:0004672//protein kinase activity;GO:0004674//protein serine/threonine kinase activity;GO:0005524//ATP binding;GO:0016772//transferase activity, transferring phosphorus-containing groups;GO:0030246//carbohydrate binding;	-	11.6203	21	30.2417	42.9573	52.1962	27.3909	52	17.007	10.1747	78	34.2956	59.6275	9.94199	10.3926	10.3926	124.837	105	102
Niben101Scf00096g04015	-	K10355	IPR004000;	sp|O17320|ACT_CRAGI	Actin	-	-	-	-	2637.14	2110.78	1390	972.747	1657.46	2731.84	1373.9	1810.39	2307.24	882	1457	783.211	5404	5630.35	4499.26	1730.07	1413.79	1328
Niben101Scf00096g04017	-	-	-	ref|XP_007031788.1|	Thioredoxin superfamily protein isoform 3 [Theobroma cacao] gb|EOY02714.1| Thioredoxin superfamily protein isoform 3 [Theobroma cacao]	-	-	-	-	8.31407	10.7773	2	0	2.32407	0	4.32024	3.06838	0	0	0	0	2.77491	5	5.1963	0.93168	0	1.03926
Niben101Scf00096g05004	-	-	-	gb|ADX62222.1|	Ycf1, partial (chloroplast) [Lepechinia mexicana]	-	-	-	-	0	0	0	0	0	0	0	0	0	0	0	0	0	0	0	0	0	1.08006
Niben101Scf00096g05005	-	-	IPR014977;	sp|Q9FRG8|GRF9_ORYSJ	Growth-regulating factor 9	-	-	-	-	290.993	339.131	167.909	170.439	359.584	199.38	181	292	133.634	27	37.8021	38.8661	21.8275	46.3538	53	51.0209	45.3236	30
Niben101Scf00099g00002	GO:0000166;GO:0003824;GO:0003899;GO:0006351;GO:0044237;	K03012	IPR005574;	sp|O15514|RPB4_HUMAN	DNA-directed RNA polymerase II subunit RPB4	GO:0006351//transcription, DNA-templated;GO:0044237//cellular metabolic process;	-	GO:0000166//nucleotide binding;GO:0003824//catalytic activity;GO:0003899//DNA-directed 5'-3' RNA polymerase activity;	ko03020(RNA polymerase)	70	122.014	44	124.207	99.2109	223.02	429.826	219	281.678	185.919	178	116.397	128.572	91.6872	133.025	95.6118	65.5618	115
Niben101Scf00099g00003	GO:0005515;GO:0008270;	K19043	IPR013083;	sp|Q8N7C7|RN148_HUMAN	RING finger protein 148	-	-	GO:0005515//protein binding;GO:0008270//zinc ion binding;	-	550	450.684	435.661	479	619.398	450.001	811.929	590.299	542.493	414.925	405	475	778.563	671	672.877	1398.16	1109.41	1252.61
Niben101Scf00099g00007	-	-	-	sp|P0C6U9|R1A_CVM2	Replicase polyprotein 1a	-	-	-	-	0	2.07852	0	0	0	0	1	2.16012	2.04559	0	0	0	1.06294	0	1	2.07852	0	2.20933
Niben101Scf00099g00017	-	-	-	emb|CDX95057.1|	BnaC05g06140D [Brassica napus]	-	-	-	-	114.486	85.9146	85.412	58.9957	51	85.0348	116.546	90	120.554	29.8138	36.4539	29.0993	98.7296	87.1164	116	40	39.5092	42
Niben101Scf00099g01001	-	-	-	emb|CAA78966.1|	pollen preferential protein [Lilium longiflorum] emb|CAA78977.1| pollen preferential protein [Lilium longiflorum] gb|AAA33399.1| pollen preferential protein [Lilium longiflorum]	-	-	-	-	135	84.18	47.5157	77.3266	57.1593	85.2193	138.308	206	257	37.1851	29	44.2824	309.906	308.432	367.67	91	96.7271	66.5979
Niben101Scf00099g01005	-	-	-	gb|EMT03847.1|	70 kDa peptidyl-prolyl isomerase [Aegilops tauschii]	-	-	-	-	47	36	22.0787	10	23.7613	52.1624	58.8394	71.6376	61	8.50348	6.4748	11	59.2378	63.3542	79.5359	8.31407	13.5104	8.98107
Niben101Scf00100g00011	GO:0004672;GO:0005524;GO:0006468;GO:0016772;	-	IPR011009;IPR013320;	AT4G00340.1	receptor-like protein kinase 4 LENGTH=818	GO:0006468//protein phosphorylation;	-	GO:0004672//protein kinase activity;GO:0005524//ATP binding;GO:0016772//transferase activity, transferring phosphorus-containing groups;	-	2.10699	0	0	0	0	0	0	1.10467	0	0	0	1	0	0	0	0	3.06838	0
Niben101Scf00100g00015	-	K11801	IPR015943;IPR020472;	sp|P69103|GBLP_TRYBB	Guanine nucleotide-binding protein subunit beta-like protein	-	-	-	-	61.8612	41.5704	20.7852	19.7584	26	30	49.9675	31	59.4033	40.9117	38.9099	43.1933	60	78.6572	85.0973	54	37.4133	24.2237
Niben101Scf00100g00017	GO:0008152;GO:0016787;	K14493	IPR029058;	sp|Q6L545|GID1_ORYSJ	Gibberellin receptor GID1	GO:0008152//metabolic process;	-	GO:0016787//hydrolase activity;	ko04075(Plant hormone signal transduction)	43	31.3217	57.2764	53.1453	12.6419	8	116.923	49.0235	100	9.35333	9.3168	6.62799	56.12	56.12	56.5807	15	12	12.7824
Niben101Scf00100g00020	GO:0008152;GO:0016787;	K14493	IPR029058;	sp|Q6L545|GID1_ORYSJ	Gibberellin receptor GID1	GO:0008152//metabolic process;	-	GO:0016787//hydrolase activity;	ko04075(Plant hormone signal transduction)	92.4971	98	180.831	83.8512	39.7679	85.2193	339.838	237.1	331	33	27.8888	35	179.29	202.513	229.663	111.67	69	76.5313
Niben101Scf00103g00002	GO:0005515;GO:0008270;	K19040	IPR013083;	sp|Q08CG8|RNF44_DANRE	RING finger protein 44	-	-	GO:0005515//protein binding;GO:0008270//zinc ion binding;	-	35.0262	21	55	95.2868	42	46.4426	118.644	26.5726	45.3003	42	46.7691	63.823	43	47.8059	41.9256	61.8612	56.12	61.3163
Niben101Scf00103g00017	GO:0005576;GO:0009664;	-	IPR007118;	sp|Q9C554|EXPA1_ARATH	Expansin-A1	GO:0009664//plant-type cell wall organization;	GO:0005576//extracellular region;	-	-	0	0	0	0	0.924971	0	0	0	0	2.07852	8.31407	0.898107	0	0	0	3	5.4003	6.13676
Niben101Scf00103g00018	GO:0006869;GO:0008289;	-	IPR000528;IPR016140;	sp|P85894|LTP1_MORNI	Non-specific lipid-transfer protein 1	GO:0006869//lipid transport;	-	GO:0008289//lipid binding;	-	32.6088	134.769	94.5726	304.503	556.826	784	22	34.861	31	494.667	535.943	509.625	122.205	29	56.3356	244.192	197	214.087
Niben101Scf00103g00019	-	-	IPR020864;	AT1G29690.1	MAC/Perforin domain-containing protein LENGTH=561	-	-	-	-	899.415	682	884.569	1050.41	1267.89	1042.96	1074	748.306	616.956	1962	2199.07	2270.5	745.649	591.338	673.44	1843.81	1810	1924
Niben101Scf00103g01006	GO:0004672;GO:0005524;GO:0006468;GO:0016772;	-	IPR011009;IPR015784;	AT5G01850.1	Protein kinase superfamily protein LENGTH=333	GO:0006468//protein phosphorylation;	-	GO:0004672//protein kinase activity;GO:0005524//ATP binding;GO:0016772//transferase activity, transferring phosphorus-containing groups;	-	486.824	238.642	379	104.965	117.392	298.26	853.232	722.285	521.8	65	88	85.9906	430	494.667	564.581	185.059	211.752	120
Niben101Scf00103g03008	-	-	-	emb|CDY16294.1|	BnaC01g23290D [Brassica napus]	-	-	-	-	715.01	647.535	915	906	1132.98	984	1261.51	796.755	700.379	907.059	1231	1545.51	641.93	461	646.419	1014.6	1035.07	893.763
Niben101Scf00103g04001	-	-	-	AT3G51620.2	PAP/OAS1 substrate-binding domain superfamily LENGTH=829	-	-	-	-	525.715	530.504	514.105	354	497.454	410.687	732	578.867	559.008	128.141	160.046	126.79	424.805	440	487	419.494	342	316.458
Niben101Scf00103g04008	GO:0004672;GO:0004674;GO:0005524;GO:0006468;GO:0016772;	K08867	IPR011009;	sp|O61125|STK4_DICDI	Serine/threonine-protein kinase 4 homolog A	GO:0006468//protein phosphorylation;	-	GO:0004672//protein kinase activity;GO:0004674//protein serine/threonine kinase activity;GO:0005524//ATP binding;GO:0016772//transferase activity, transferring phosphorus-containing groups;	-	163.164	38.1989	127.036	33.2563	77.9444	133.818	64	135	96.4489	13	20.5211	7.15955	121.475	162.238	154	39.3286	22.1993	24
Niben101Scf00103g04009	-	-	-	AT2G38500.1	2-oxoglutarate (2OG) and Fe(II)-dependent oxygenase superfamily protein LENGTH=356	-	-	-	-	50	60.4258	48	50.7628	53.1852	58.8394	52.6747	69	39.3286	31.449	26	15.5889	26.087	17.6746	28.06	63.3948	43.1091	57
Niben101Scf00103g04023	-	-	-	ref|XP_007033561.1|	2-oxoglutarate (2OG) and Fe(II)-dependent oxygenase superfamily protein, putative [Theobroma cacao] gb|EOY04487.1| 2-oxoglutarate (2OG) and Fe(II)-dependent oxygenase superfamily protein, putative [Theobroma cacao]	-	-	-	-	0	0	0	0	0	0.93168	1.10467	0	0	0	0	0	1.16203	0	0	0	0	0
Niben101Scf00104g00003	-	K14496	IPR019587;IPR023393;	sp|O49686|PYR1_ARATH	Abscisic acid receptor PYR1	-	-	-	ko04075(Plant hormone signal transduction);ko04016(MAPK signaling pathway - plant)	193.302	220.323	172.437	50	90	158.037	224	314.297	469.462	19.9295	35.8188	31	333.762	249.742	315	99.7689	65.2176	100.525
Niben101Scf00104g02012	GO:0009507;GO:0009523;GO:0015979;	K02721	IPR009806;	AT2G30570.1	photosystem II reaction center W LENGTH=133	GO:0015979//photosynthesis;	GO:0009507//chloroplast;GO:0009523//photosystem II;	-	ko00195(Photosynthesis)	286.216	601.402	77.8198	48.4608	257	728.111	73.9977	190	419.861	6.52176	9.94199	10.3926	1044.46	695.135	870	9	5.81017	3
Niben101Scf00104g02013	-	-	IPR001810;	sp|Q8W104|FBL17_ARATH	F-box/LRR-repeat protein 17	-	-	-	-	6	64.4341	30.7454	8.83732	19.7459	27.0207	19.7584	16	45	10.4583	4	45.3625	22.5014	19.9295	24.2304	19	22.3216	28.6741
Niben101Scf00104g02014	GO:0005634;GO:0006355;GO:0046983;	K14484	IPR003311;	sp|P33077|IAA4_ARATH	Auxin-responsive protein IAA4	GO:0006355//regulation of transcription, DNA-templated;	GO:0005634//nucleus;	GO:0046983//protein dimerization activity;	ko04075(Plant hormone signal transduction)	67	127	120.852	125	127.447	81.8234	105.342	73.7446	75	42.5174	49.0235	44	135.104	104.348	185.584	157.967	154.85	117.652
Niben101Scf00104g02015	-	K16277	IPR013083;	sp|Q28H21|PCGF1_XENTR	Polycomb group RING finger protein 1	-	-	-	-	23.1769	16	26.5734	16.6495	17	14.5496	32.6088	43.0819	32.217	17.6674	18.8602	18	26	16.2685	20	27.0015	21.4786	14.2353
Niben101Scf00104g03001	GO:0000786;GO:0003677;GO:0005634;GO:0046982;	K11251	IPR009072;	sp|P08985|H2AV_DROME	Histone H2A.v	-	GO:0000786//nucleosome;GO:0005634//nucleus;	GO:0003677//DNA binding;GO:0046982//protein heterodimerization activity;	-	50.8146	143.418	86.2585	44.0072	74	102	74.3702	79	90.725	33.7522	27.5217	51.6212	108	79.7201	94.347	50	58.1985	31.6771
Niben101Scf00104g03002	-	K06890	IPR006214;	AT1G03070.1	Bax inhibitor-1 family protein LENGTH=247	-	-	-	-	3	1.08006	0	0.949023	0	1	4.25174	0.924971	1	1.03926	0	0	3.11778	0	1.79621	0	1	0
Niben101Scf00104g03006	GO:0003824;GO:0004722;GO:0006470;	K17505	IPR001932;IPR015655;	AT3G63340.2	Protein phosphatase 2C family protein LENGTH=1075	GO:0006470//protein dephosphorylation;	-	GO:0003824//catalytic activity;GO:0004722//protein serine/threonine phosphatase activity;	-	0	0	0	0	1.10467	1.03926	2.07852	0	1	3	1.16203	2	2.16012	1.02279	0.949023	3.16048	0	3.18881
Niben101Scf00104g03017	-	-	IPR010399;IPR018467;	AT4G14720.1	TIFY domain/Divergent CCT motif family protein LENGTH=315	-	-	-	-	0	3	0	0	1	3.24018	1.02279	0	2.10699	2	3.18881	9.24971	6	3.11778	0.93168	2.20933	1.03926	2.07852
Niben101Scf00104g04002	GO:0008271;GO:0008272;GO:0009507;GO:0015116;GO:0016020;GO:0016021;GO:0055085;	K17471	IPR001902;IPR030402;	sp|Q9SV13|SUT31_ARATH	Sulfate transporter 3.1	GO:0008272//sulfate transport;GO:0055085//transmembrane transport;	GO:0009507//chloroplast;GO:0016020//membrane;GO:0016021//integral component of membrane;	GO:0008271//secondary active sulfate transmembrane transporter activity;GO:0015116//sulfate transmembrane transporter activity;	-	324.566	172.773	267	77.5943	73.0727	151	363.741	245.963	270.643	43.6489	43.6489	35.9243	704	1376	1196.9	168	111.246	81.8234
Niben101Scf00104g04007	GO:0004672;GO:0004674;GO:0005524;GO:0006468;GO:0016772;	K08851	IPR011009;IPR022495;	AT5G26110.1	Protein kinase superfamily protein LENGTH=226	GO:0006468//protein phosphorylation;	-	GO:0004672//protein kinase activity;GO:0004674//protein serine/threonine kinase activity;GO:0005524//ATP binding;GO:0016772//transferase activity, transferring phosphorus-containing groups;	-	235.715	271.748	251.501	160.046	145.493	258	394	412.522	355	96.1253	70.5727	51.2472	265.481	263	336.95	104.522	103	66.5126
Niben101Scf00105g00001	-	-	IPR002182;IPR021929;IPR027417;	gb|AAT39951.2|	Disease resistance protein, putative [Solanum demissum]	-	-	-	-	289.347	207	335.899	562.536	450.786	367.67	404	262.545	270.091	309	328.406	209.628	311.516	310.739	390.761	253.266	256	211
Niben101Scf00105g00007	-	-	-	-	Unknown protein	-	-	-	-	0	0	0	0	0	0	0	0	0	0	1	0	0	0	0	0	0	0
Niben101Scf00107g00007	GO:0003700;GO:0006355;GO:0043565;	K14432	IPR004827;	AT1G49720.2	abscisic acid responsive element-binding factor 1 LENGTH=403	GO:0006355//regulation of transcription, DNA-templated;	-	GO:0003700//DNA-binding transcription factor activity;GO:0043565//sequence-specific DNA binding;	ko04075(Plant hormone signal transduction)	130.947	83.5239	143	45	63.9119	81	203.051	91.0285	124.322	17.9094	13	14.8811	148.92	155	191.224	44.7206	56.3379	46.7667
Niben101Scf00107g00008	GO:0005515;GO:0008270;	K10635	IPR013083;	sp|Q7L0R7|RNF44_HUMAN	RING finger protein 44	-	-	GO:0005515//protein binding;GO:0008270//zinc ion binding;	-	312.975	225.867	223.341	166	231.72	271.941	366	390.761	448.138	394.365	376.212	245.265	481.385	491	562	427.629	321	390.982
Niben101Scf00107g01005	-	K00588	IPR002935;IPR029063;	sp|O04899|CAMT5_TOBAC	Caffeoyl-CoA O-methyltransferase 5	-	-	-	ko00945(Stilbenoid, diarylheptanoid and gingerol biosynthesis);ko00941(Flavonoid biosynthesis);ko00940(Phenylpropanoid biosynthesis)	16.6281	4.6584	4.41866	15.5889	24.9422	12.5735	1	6	3.4861	10	4.32024	15.3419	5.69414	4.21398	3	12.7552	22.1993	16
Niben101Scf00107g02001	-	-	IPR000008;	AT4G34150.1	Calcium-dependent lipid-binding (CaLB domain) family protein LENGTH=247	-	-	-	-	1933	2486.75	1248	1364.12	2337.08	1870.52	1517.03	1577	1198.99	1187.66	1040	1224.25	995.966	1075.94	1125.52	1388.45	1059.77	879
Niben101Scf00107g02002	GO:0005634;	K14505	IPR013763;	sp|Q9FGQ7|CCD32_ARATH	Cyclin-D3-2	-	GO:0005634//nucleus;	-	ko04075(Plant hormone signal transduction)	105	146.685	112.846	51	66.5126	72.671	213.2	152.771	200.577	146.391	186	116	152.227	164	243.013	351.841	271.42	316.048
Niben101Scf00107g03008	-	K13449	IPR001283;	sp|A6MFK9|CRVP_DEMVE	Cysteine-rich venom protein	-	-	-	ko04626(Plant-pathogen interaction);ko04075(Plant hormone signal transduction);ko04016(MAPK signaling pathway - plant)	2383.02	3478.4	9120.27	1982	1729	1295.67	92881	37249.1	69386.2	2074.56	4304.58	3226	46163.3	26134.1	46484	4089.49	4346.29	2467.82
Niben101Scf00107g03010	GO:0004061;GO:0019441;	-	IPR007325;	sp|Q1GTB8|KYNB_SPHAL	Kynurenine formamidase	GO:0019441//tryptophan catabolic process to kynurenine;	-	GO:0004061//arylformamidase activity;	-	0	1.02279	2.84707	4.21398	1	0	1.84994	5	2.07852	6.52176	9.94199	4.15704	2.07852	1.79621	5	0	0	0
Niben101Scf00107g03016	GO:0004061;GO:0019441;	-	IPR007325;	sp|Q2N5X0|KYNB_ERYLH	Kynurenine formamidase	GO:0019441//tryptophan catabolic process to kynurenine;	-	GO:0004061//arylformamidase activity;	-	2558	3407.73	3772.37	3590.16	3365.12	2803.92	3150.56	4739	3454	3993.91	3053	5034.16	2584.6	1718.68	2523.12	2238	1983.44	1732.47
Niben101Scf00107t03001	-	-	-	-	-	-	-	-	-	0	2	3.4861	9	6.48036	3.06838	1.89805	7.37446	5	0	0	3	0	0	2.20933	0	1.03926	0.898107
Niben101Scf00108g00004	GO:0004553;GO:0005975;	-	IPR001944;IPR017853;	sp|P48981|BGAL_MALDO	Beta-galactosidase	GO:0005975//carbohydrate metabolic process;	-	GO:0004553//hydrolase activity, hydrolyzing O-glycosyl compounds;	-	2891.84	2423	2378.85	1271.83	1846	1775.05	1896.9	4803.08	3371.36	2513.97	1463.91	2220	7702	9003.44	9677	4515.73	3904	3395.6
Niben101Scf00108g01009	GO:0003700;GO:0006355;GO:0008270;GO:0043565;	-	IPR013088;	sp|Q5HZ36|GAT21_ARATH	GATA transcription factor 21	GO:0006355//regulation of transcription, DNA-templated;	-	GO:0003700//DNA-binding transcription factor activity;GO:0008270//zinc ion binding;GO:0043565//sequence-specific DNA binding;	-	86.1639	29.0993	13.5104	12.5735	1	33	13.9444	26	157.689	0	1.89805	0	160	223.216	207.193	3	3.11778	0.93168
Niben101Scf00108g01010	-	-	-	AT4G29660.1	embryo defective 2752 LENGTH=103	-	-	-	-	184	183.61	201.49	219.224	260.213	267	339.076	240.492	262	231.755	218.013	350.179	207.852	208.891	232.61	305	298	323.046
Niben101Scf00108g02006	GO:0003676;GO:0003677;GO:0003682;GO:0008270;	-	IPR001878;IPR009057;	AT5G56840.1	myb-like transcription factor family protein LENGTH=233	-	-	GO:0003676//nucleic acid binding;GO:0003677//DNA binding;GO:0003682//chromatin binding;GO:0008270//zinc ion binding;	-	3.69988	7	3.11778	13.0435	1.10467	5.1963	1.03926	4.49053	10	0	0	0	20.5211	8.18234	20.8785	0	0	0
Niben101Scf00108g02008	-	K00677	IPR011004;	sp|Q2NRL9|LPXA_SODGM	Acyl-[acyl-carrier-protein]--UDP-N-acetylglucosamine O-acyltransferase	-	-	-	-	37.7205	16	27	27.8888	16	45.3625	33.7522	22.7765	36.8723	50	77.5943	60.1231	41	37.4133	53.1057	26.512	20.7852	41.5704
Niben101Scf00108g03002	-	K15084	IPR002067;IPR023395;	AT4G26180.1	Mitochondrial substrate carrier family protein LENGTH=325	-	-	-	-	4.74511	4.21398	3	1.06294	3.69988	1	14.5496	6.52176	2.20933	0	3.11778	3.59243	11	5	11.6203	0	1.08006	0
Niben101Scf00108g03023	GO:0005737;GO:0006535;GO:0009001;GO:0016740;	K00640	IPR005881;	AT5G56760.1	serine acetyltransferase 1;1 LENGTH=312	GO:0006535//cysteine biosynthetic process from serine;	GO:0005737//cytoplasm;	GO:0009001//serine O-acetyltransferase activity;GO:0016740//transferase activity;	ko00920(Sulfur metabolism);ko00270(Cysteine and methionine metabolism)	319.566	303.783	418.821	224.48	240.693	338	646	818.072	686	204.131	181.034	215.428	838.582	590	691.971	493.009	430	434.41
Niben101Scf00108g03025	GO:0005737;GO:0006479;GO:0008168;GO:0008276;	K11434	IPR010456;IPR025799;IPR029063;	AT4G29510.1	arginine methyltransferase 11 LENGTH=390	GO:0006479//protein methylation;	GO:0005737//cytoplasm;	GO:0008168//methyltransferase activity;GO:0008276//protein methyltransferase activity;	-	285.861	242	297.016	197.399	256.236	288.658	297	243.412	233.093	96	114.319	143.479	123.722	106.004	138.221	76.3391	93	94
Niben101Scf00108g04010	-	K12837	-	sp|Q9ZR39|U2A2A_NICPL	Splicing factor U2af large subunit A	-	-	-	ko03040(Spliceosome)	932.194	875.022	912	687.99	777.953	969.896	1531.87	1210.74	1242.08	1266	1271	1786.05	1242	1158.9	1171.1	1275.49	1164.11	1153
Niben101Scf00108g05008	GO:0003824;GO:0009058;GO:0030170;	K01762	IPR015424;	sp|Q9STR4|1A17_ARATH	1-aminocyclopropane-1-carboxylate synthase 7	GO:0009058//biosynthetic process;	-	GO:0003824//catalytic activity;GO:0030170//pyridoxal phosphate binding;	ko00270(Cysteine and methionine metabolism)	0	0	0	0	0	1	0	0	0	0	0	0	0	0	0	0	0	0
Niben101Scf00108g05010	-	-	-	-	Unknown protein	-	-	-	-	0	0.949023	1.05349	0	0	0.924971	0	0	0.93168	1.10467	0	0	0	0	0	0	1	0
Niben101Scf00108g06002	-	-	-	AT5G53750.1	CBS domain-containing protein LENGTH=408	-	-	-	-	18.7067	5.59008	3.314	1.03926	7.27481	7.18485	15	29	12.7824	6	7.56042	13.2963	2.84707	1.05349	2	4.25174	1.84994	6
Niben101Scf00108g06007	-	-	IPR001194;IPR005113;	AT1G49040.1	stomatal cytokinesis defective / SCD1 protein (SCD1) LENGTH=1187	-	-	-	-	47	34.861	39	23.7613	27.6154	34.1648	42.1398	40	30.8251	20.3494	12	22.8637	22.3603	20.9886	27.0207	19.7459	15.2678	22
Niben101Scf00108g06008	-	-	IPR011990;	ref|XP_007025667.1|	Tetratricopeptide repeat-like superfamily protein, putative isoform 2 [Theobroma cacao] gb|EOY28289.1| Tetratricopeptide repeat-like superfamily protein, putative isoform 2 [Theobroma cacao]	-	-	-	-	85	74.4055	68.4478	34	43.6489	68.9443	87.2685	89.3763	86.2585	35.0262	36	34	54.6156	55	79.9244	78.755	69.2786	56.8887
Niben101Scf00109g00001	-	-	IPR029033;	sp|A9IXE7|GPMA_BART1	2,3-bisphosphoglycerate-dependent phosphoglycerate mutase	-	-	-	-	229.676	273.325	162.557	160	146	205.68	260	198.731	204.559	614.967	1235.75	702	184.951	207.193	187	684.872	534.784	634.078
Niben101Scf00109g00003	-	-	IPR015300;	sp|Q01593|ABI3_ARATH	B3 domain-containing transcription factor ABI3	-	-	-	-	0	0	0	0	0	1.06294	0.924971	1	0	0	0	1.03926	2.07852	0	0	0	0	0
Niben101Scf00109g00010	-	-	IPR002885;	sp|Q56X05|PPR15_ARATH	Pentatricopeptide repeat-containing protein	-	-	-	-	39	60.277	32.6088	14.3606	33.2563	30.1385	42.211	35	27	4.64814	1	10.8006	28.6382	15.1844	14.7489	11	3.18881	4.62485
Niben101Scf00109g00017	-	K15102	IPR018108;IPR023395;	ref|XP_003630569.1|	Mitochondrial phosphate carrier protein [Medicago truncatula]	-	-	-	-	3417	3500	3681.33	2314	2924.8	3130.77	2591.78	2768.58	2592	576.111	816.749	602	2518.13	1688.2	2149.68	707.736	612.124	377.205
Niben101Scf00109g01005	-	-	-	emb|CDY26595.1|	BnaA09g46820D [Brassica napus]	-	-	-	-	203.324	159	244.475	171.12	217	235.912	193.789	250.759	260.854	311.778	215.546	408	174	213.814	200	274.335	208.65	217.326
Niben101Scf00109g02002	GO:0005783;GO:0016021;	K13250	IPR008856;	gb|EMT00535.1|	Translocon-associated protein subunit beta [Aegilops tauschii]	-	GO:0005783//endoplasmic reticulum;GO:0016021//integral component of membrane;	-	ko04141(Protein processing in endoplasmic reticulum)	15.4653	12.4711	24.9422	19.7584	24	10	26.7268	22	17.281	12.2735	27.5217	22.1234	18	21.2587	17.5744	34	27.0207	17.7019
Niben101Scf00109g02010	GO:0016747;	-	IPR007130;IPR029058;	AT3G02030.1	transferases, transferring acyl groups other than amino-acyl groups;acyltransferases LENGTH=662	-	-	GO:0016747//acyltransferase activity, transferring groups other than amino-acyl groups;	-	261	354.26	207.627	135.71	220.18	241	94.6012	112.846	144	72.7481	64.2859	77.3266	119.515	68.5911	70.0523	40	29	22.0787
Niben101Scf00109g02013	GO:0005515;GO:0005737;	-	IPR027267;	AT2G33490.1	hydroxyproline-rich glycoprotein family protein LENGTH=623	-	GO:0005737//cytoplasm;	GO:0005515//protein binding;	-	1302.36	1641	1254.39	2595.66	4201.04	2235.45	1855.08	1208.85	804	4225	5534.77	5601	786.283	603.448	581.751	2549.46	2064	2115.24
Niben101Scf00109g02016	GO:0005783;GO:0016021;	K13250	IPR008856;	sp|P23438|SSRB_CANFA	Translocon-associated protein subunit beta	-	GO:0005783//endoplasmic reticulum;GO:0016021//integral component of membrane;	-	ko04141(Protein processing in endoplasmic reticulum)	316.134	329	452	538.022	390	469.826	462.302	381.507	421.398	286	393.286	363.514	292	230.716	328.883	400.993	345.034	286.836
Niben101Scf00109g02025	-	K00891	IPR000623;IPR027417;	AT3G26900.1	shikimate kinase like 1 LENGTH=280	-	-	-	ko00400(Phenylalanine, tyrosine and tryptophan biosynthesis)	90.1571	199.11	94	68.0278	115.621	178	167.321	171.429	317.039	18.7067	12.4711	48.4978	166	162	208.004	55	77.7643	66.4815
Niben101Scf00109g02027	GO:0003677;GO:0006355;	-	IPR003441;	sp|Q52QH4|NAC68_ORYSJ	NAC domain-containing protein 68	GO:0006355//regulation of transcription, DNA-templated;	-	GO:0003677//DNA binding;	-	565.53	1514.5	449.999	2450.57	3081.4	2545	272	705.355	383	1935.47	1922.85	838.936	164.345	139	197.706	291.366	290	243.187
Niben101Scf00109g03002	-	K16675	IPR001594;	ref|XP_002869709.1|	zinc ion binding protein [Arabidopsis lyrata subsp. lyrata] gb|EFH45968.1| zinc ion binding protein [Arabidopsis lyrata subsp. lyrata]	-	-	-	-	327.694	263	341.299	872.442	830.395	793.282	395	311.44	347.789	1213	1427.94	1777.64	507.041	457.274	514.433	921.458	908	894
Niben101Scf00109g03008	GO:0006629;GO:0008081;	-	IPR017946;	sp|Q9NZC3|GDE1_HUMAN	Glycerophosphodiester phosphodiesterase 1	GO:0006629//lipid metabolic process;	-	GO:0008081//phosphoric diester hydrolase activity;	-	1036.36	942.545	606	1982.91	1678.89	1423.91	790.876	893.763	320.624	1540	3890	1546.67	388	379.101	553.331	1266.95	1340.05	722
Niben101Scf00109g04006	GO:0004672;GO:0005524;GO:0006468;GO:0016772;	K13430	IPR011009;IPR013320;	sp|Q9LIG2|RLK6_ARATH	Receptor-like protein kinase	GO:0006468//protein phosphorylation;	-	GO:0004672//protein kinase activity;GO:0005524//ATP binding;GO:0016772//transferase activity, transferring phosphorus-containing groups;	ko04626(Plant-pathogen interaction)	0	1.79621	4	1	3.4861	4	1.08006	4.09117	1.89805	2.10699	2	3.18881	0.924971	1	0	0	4.41866	0
Niben101Scf00109g04007	GO:0004672;GO:0004674;GO:0005524;GO:0006468;GO:0016772;	K13430	IPR011009;	sp|Q9LIG2|RLK6_ARATH	Receptor-like protein kinase	GO:0006468//protein phosphorylation;	-	GO:0004672//protein kinase activity;GO:0004674//protein serine/threonine kinase activity;GO:0005524//ATP binding;GO:0016772//transferase activity, transferring phosphorus-containing groups;	ko04626(Plant-pathogen interaction)	0	0	2.10699	4	2.12587	0.924971	0	3.11778	1.86336	4.41866	1.03926	5.1963	0	1	0	1.16203	3	1.08006
Niben101Scf00109g04011	GO:0000145;GO:0006887;	K07195	IPR004140;IPR016159;	AT5G13990.1	exocyst subunit exo70 family protein C2 LENGTH=695	GO:0006887//exocytosis;	GO:0000145//exocyst;	-	-	1.03926	0	0	0	2.07852	0	0	0	3.4861	1	2.16012	0	0.949023	0	1	9.56642	4.62485	4
Niben101Scf00109g05009	-	K15559	IPR006569;IPR008942;	sp|Q9NQG5|RPR1B_HUMAN	Regulation of nuclear pre-mRNA domain-containing protein 1B	-	-	-	-	229	341.638	192	178.21	243.425	203.091	371.884	225	294.433	131.346	172	210.97	231.057	247.445	222.401	334.641	278.413	281
Niben101Scf00109g05011	GO:0003690;GO:0005739;GO:0006355;	K15032	IPR003690;	AT4G14605.1	Mitochondrial transcription termination factor family protein LENGTH=493	GO:0006355//regulation of transcription, DNA-templated;	GO:0005739//mitochondrion;	GO:0003690//double-stranded DNA binding;	-	207	186.014	52.7233	105	180.831	386.647	165.7	144.457	267.09	46.7016	67	103	40.6712	59	59.4033	25.5698	16.1334	24.2304
Niben101Scf00109g05016	-	K06670	IPR006910;	sp|Q9FQ20|SCC12_ARATH	Sister chromatid cohesion 1 protein 2	-	-	-	-	82.1015	90.4156	54.7845	56	80	101.097	123	93.9652	125.803	72.1257	87.4401	92	159.44	137.821	124	148.614	109.007	131.455
Niben101Scf00109g05018	-	-	IPR020683;	sp|Q69ZU8|ANKR6_MOUSE	Ankyrin repeat domain-containing protein 6	-	-	-	-	10.8006	6.13676	7.59218	7.37446	14	54.2097	10.1747	9	16.6281	6.52176	14.3606	13.5104	32.217	7.18485	24	18	10.4583	8
Niben101Scf00109g07004	-	-	IPR019448;	ref|XP_007028895.1|	Nucleolar protein gar2-related isoform 2 [Theobroma cacao] gb|EOY09397.1| Nucleolar protein gar2-related isoform 2 [Theobroma cacao]	-	-	-	-	501	603.81	284.162	2038.11	2280.13	1568.24	225.425	442	556	2448.41	2470	3672.2	423.436	459.327	456.163	706	706.852	580.882
Niben101Scf00109g07005	-	K13448	IPR011992;IPR028974;	AT1G76640.1	Calcium-binding EF-hand family protein LENGTH=159	-	-	-	ko04626(Plant-pathogen interaction)	186	312	373.013	1796	2286.49	849.941	324.566	123.259	78	11579.6	10491.9	10322	347.113	313.044	278.376	7656.22	6928.74	6381.05
Niben101Scf00109g07013	GO:0004672;GO:0005524;GO:0006468;GO:0016772;	-	IPR011009;IPR018392;	sp|P47735|RLK5_ARATH	Receptor-like protein kinase 5	GO:0006468//protein phosphorylation;	-	GO:0004672//protein kinase activity;GO:0005524//ATP binding;GO:0016772//transferase activity, transferring phosphorus-containing groups;	-	0	0	0	0.924971	0	0	0	1.10467	1.03926	3.11778	1.79621	0	0	1.16203	0	1.08006	1.02279	0
Niben101Scf00109g07023	GO:0004672;GO:0005515;GO:0005524;GO:0006468;GO:0016772;	-	IPR001611;IPR003591;IPR011009;IPR013320;	sp|Q9FN94|RLK7_ARATH	Receptor-like protein kinase	GO:0006468//protein phosphorylation;	-	GO:0004672//protein kinase activity;GO:0005515//protein binding;GO:0005524//ATP binding;GO:0016772//transferase activity, transferring phosphorus-containing groups;	-	350.179	436.489	279.561	63.7656	121	178	304.453	235	340.219	15.3419	31.3177	17.9094	166	121.175	161.87	81	45.7274	37.2672
Niben101Scf00109g07025	-	-	-	emb|CDX74323.1|	BnaA03g27240D [Brassica napus]	-	-	-	-	407	389.902	326.271	91.1062	198.057	298	282.741	465.26	518	67.5518	67.0809	87.2685	373.094	368.937	308.949	104	78	69.7221
Niben101Scf00109g08004	-	-	IPR008972;	sp|Q41001|BCP_PEA	Blue copper protein	-	-	-	-	3.69988	4	0	2.79504	1.10467	1.03926	3.11778	4.49053	4	0	2.32407	0	5.4003	1.02279	2.84707	1.05349	0	0
Niben101Scf00109g08006	GO:0003735;GO:0005840;GO:0006412;	-	IPR001911;	sp|C0QTB8|RS21_PERMH	30S ribosomal protein S21	GO:0006412//translation;	GO:0005840//ribosome;	GO:0003735//structural constituent of ribosome;	-	101.486	170	61	51.1295	73	133.927	102.279	105.342	161.185	33	22.3216	26.8242	146	166.281	152.795	26.512	13.5104	14.5496
Niben101Scf00109g08007	-	K20298	IPR007258;	sp|Q94KD3|VP52A_ARATH	Vacuolar protein sorting-associated protein 52 A	-	-	-	-	0	1.05349	0	0	0	0	1.03926	0	0	125.75	46.7667	178.723	2	2	0	9	4.32024	10.2279
Niben101Scf00109g08027	-	K01052	IPR006693;IPR029058;	sp|Q67ZU1|LIP2_ARATH	Triacylglycerol lipase 2	-	-	-	ko00100(Steroid biosynthesis)	0	1.10467	0	18.7067	8.08296	12	0	0	0	2.16012	8.18234	4.74511	0	0	0	0	0	0
Niben101Scf00109g08029	-	-	IPR003959;IPR015415;IPR027417;	sp|Q89AF2|FTSH_BUCBP	ATP-dependent zinc metalloprotease FtsH	-	-	-	-	6.97221	41	11.8807	5.11396	9.49023	10.5349	6	13.8182	17.5744	5	11.4319	7.45344	7.73266	9.35333	9.35333	10.7773	6	3
Niben101Scf00109g09004	GO:0004497;GO:0005506;GO:0016705;GO:0020037;GO:0055114;	-	IPR001128;	AT5G08250.1	Cytochrome P450 superfamily protein LENGTH=488	GO:0055114//obsolete oxidation-reduction process;	-	GO:0004497//monooxygenase activity;GO:0005506//iron ion binding;GO:0016705//oxidoreductase activity, acting on paired donors, with incorporation or reduction of molecular oxygen;GO:0020037//heme binding;	-	0	0	0	0	0	0	0	0	0	2	0	0	0	0	0	0	0	0
Niben101Scf00109g09010	-	-	IPR013989;	AT3G27090.1	DCD (Development and Cell Death) domain protein LENGTH=296	-	-	-	-	1182.68	758.002	651	432	751.836	980	1231.27	1371.56	1697.8	231.769	175	245.538	720.552	684	810.622	202.175	202.154	195.381
Niben101Scf00109g09011	GO:0009055;GO:0016491;GO:0030151;GO:0046872;GO:0055114;	K00387	IPR008335;IPR014756;	sp|Q9S850|SUOX_ARATH	Sulfite oxidase	GO:0055114//obsolete oxidation-reduction process;	-	GO:0009055//electron transfer activity;GO:0016491//oxidoreductase activity;GO:0030151//molybdenum ion binding;GO:0046872//metal ion binding;	ko00920(Sulfur metabolism)	11.2507	7.59218	9.48145	3	10.6294	10.1747	15	11.4319	2.79504	5.52333	4.15704	3.11778	10.7773	15	8	1.16203	1	7.56042
Niben101Scf00109g10001	-	-	IPR017945;	sp|Q8DDD6|TSAC_VIBVU	Threonylcarbamoyl-AMP synthase	-	-	-	-	119.515	105.28	81.7452	38.4526	75.8659	82.6258	100	104	160.361	12	21.6012	17.3875	118.628	94.8145	134	42.5174	19.4244	12
Niben101Scf00109g10003	GO:0009186;GO:0016491;GO:0055114;	K10808	IPR000358;IPR009078;	sp|P49730|RIR2_TOBAC	Ribonucleoside-diphosphate reductase small chain	GO:0009186//deoxyribonucleoside diphosphate metabolic process;GO:0055114//obsolete oxidation-reduction process;	-	GO:0016491//oxidoreductase activity;	ko00480(Glutathione metabolism);ko00240(Pyrimidine metabolism);ko00230(Purine metabolism)	107	320.722	110	138.248	227.06	236.307	185.415	116	252.979	1010.07	1310	1381.18	66.1493	71.8032	84.18	1355.19	867.571	819
Niben101Scf00109g10004	GO:0004601;GO:0006979;GO:0020037;GO:0055114;	K00430	IPR010255;	sp|Q96509|PER55_ARATH	Peroxidase 55	GO:0006979//response to oxidative stress;GO:0055114//obsolete oxidation-reduction process;	-	GO:0004601//peroxidase activity;GO:0020037//heme binding;	ko00940(Phenylpropanoid biosynthesis)	2	17.007	4.62485	80	73.7874	27.9504	9.94199	2.07852	4.15704	1949.79	2069	2634	174.305	75	60.4833	2697.1	1958.78	2011.12
Niben101Scf00109g10005	GO:0005622;GO:0006810;	-	IPR002075;	sp|Q9C7F5|NTF2_ARATH	Nuclear transport factor 2	GO:0006810//transport;	GO:0005622//intracellular anatomical structure;	-	-	827.25	626.673	567.604	556	640	966.813	760	1001.22	1037.11	681.398	1024	862	894.991	572.557	656	1080.83	854.35	996.408
Niben101Scf00109g10006	-	-	IPR021775;	AT5G08391.1	Protein of unknown function (DUF 3339) LENGTH=69	-	-	-	-	3.24018	5.11396	7.59218	1.05349	4	3.18881	3.69988	7	14.5496	1.86336	2.20933	0	6.23556	9.87918	4	0	2.32407	0
Niben101Scf00109g10007	-	-	IPR021775;	ref|NP_001052628.1|	product [Oryza sativa Japonica Group]	-	-	-	-	12	8.31407	7.45344	5.52333	3.11778	9.35333	4.49053	8	22	58.1017	99	93.9652	29.661	21.8275	31.6048	16	14.8811	13.8746
Niben101Scf00109g10008	-	-	-	-	Unknown protein	-	-	-	-	0	0	0	0	0	0	0	0	2	0	0	0	0	0	0	1.03926	1.03926	0
Niben101Scf00109g10012	-	-	IPR015880;	sp|Q7ZZ00|ZN511_DANRE	Zinc finger protein 511	-	-	-	-	163.292	141	127.552	92.4971	147	159.007	150	187.793	236.951	119.515	135.614	213	164	168.495	152	135.007	90.0057	90.1571
Niben101Scf00109g10013	-	-	IPR010658;IPR020846;	AT2G34350.1	Nodulin-like / Major Facilitator Superfamily protein LENGTH=525	-	-	-	-	489.367	184.988	121.593	224.527	502	896	271.916	376	495.747	429.573	158.487	269.695	127	208.335	165.57	554	753.463	543.169
Niben101Scf00109g10029	-	-	-	ref|XP_002509497.1|	conserved hypothetical protein [Ricinus communis] gb|EEF50884.1| conserved hypothetical protein [Ricinus communis]	-	-	-	-	50	25.9214	28.6382	4.74511	13.6954	26	11.6923	4.62485	21	1.03926	0.93168	0	6.23556	7.27481	5.38864	0	0	0
Niben101Scf00109g10030	GO:0005515;GO:0005742;GO:0045040;	-	IPR010547;	sp|P92792|TOM20_SOLTU	Mitochondrial import receptor subunit TOM20	GO:0045040//protein insertion into mitochondrial outer membrane;	GO:0005742//mitochondrial outer membrane translocase complex;	GO:0005515//protein binding;	-	292.291	291	357.505	337.268	357.911	372.055	435.45	339.484	399	597	969.137	733	367.22	271.04	287.554	800.656	766	821.649
Niben101Scf00109t04001	-	-	-	-	-	-	-	-	-	0.898107	3	1	12.7824	11	10.8006	11.2507	10.4392	2.10699	26	13.8182	30.524	4	2.07852	1.86336	45.2913	9.35333	16.6281
Niben101Scf00109t08001	-	-	-	-	-	-	-	-	-	0	2.10699	0	1.06294	0	0	0	0	0	0	0	0	0	0	1.16203	0	0	0
Niben101Scf00109t10054	-	-	-	-	-	-	-	-	-	0	0	0	1.03926	1.79621	0	0	1.16203	1	2.16012	2.04559	1.89805	1.05349	1	1.06294	2.77491	2	2.07852
Niben101Scf00110g00006	-	K08332	-	ref|XP_010089235.1|	U-box domain-containing protein 43 [Morus notabilis] gb|EXB37533.1| U-box domain-containing protein 43 [Morus notabilis]	-	-	-	-	3050.34	2541	1048.74	1977.06	3369.03	3809.44	1038	2091.86	1144.19	1195	1037.18	1019.26	955.535	954.04	1203.46	1135.21	1041	1042
Niben101Scf00110g00008	-	-	IPR015300;	emb|CDY61779.1|	BnaC03g72580D [Brassica napus]	-	-	-	-	0	0	0	0	0	0	0	0	0	0	0	0	0	0	1.02279	0	0	0
Niben101Scf00110g00013	GO:0000398;GO:0005681;	K12874	IPR026300;IPR027417;	sp|O60306|AQR_HUMAN	Intron-binding protein aquarius	GO:0000398//mRNA splicing, via spliceosome;	GO:0005681//spliceosomal complex;	-	ko03040(Spliceosome)	895.841	776.862	721	860	1301.48	889	966.653	670.952	580.802	632.097	812	786.572	421.787	367	463.51	591.617	636.287	626.673
Niben101Scf00110g01009	-	-	-	gb|AES68921.2|	ERD (early-responsive to dehydration stress) family protein [Medicago truncatula]	-	-	-	-	9.20513	31.3177	11.5884	18	38.2657	26.8242	20	7.27481	5.59008	2.20933	15.5889	18.7067	10.7773	7	5	13.9444	13	17.281
Niben101Scf00110g01011	GO:0003735;GO:0005840;GO:0006412;	K02960	IPR000754;IPR020568;	sp|Q9V195|RS9_PYRAB	30S ribosomal protein S9	GO:0006412//translation;	GO:0005840//ribosome;	GO:0003735//structural constituent of ribosome;	ko03010(Ribosome)	441.685	463.045	635.182	411.547	371.016	473.302	557	484	646.091	217	399.622	306.838	507.727	434.04	485	328.447	227.543	274
Niben101Scf00110g02006	-	-	IPR009057;	AT3G53440.1	Homeodomain-like superfamily protein LENGTH=512	-	-	-	-	13	42.9953	16	99.3655	101.256	55.9923	27.3909	22	11.6923	99.8968	155	222.401	14.9069	11.0467	17.6674	65.4733	67.358	72
Niben101Scf00110g03002	-	-	-	ref|XP_007011120.1|	Agglutinin-like protein ALA1, putative isoform 3 [Theobroma cacao] gb|EOY19930.1| Agglutinin-like protein ALA1, putative isoform 3 [Theobroma cacao]	-	-	-	-	2104	2034.46	1079.44	802	1597.34	1718.02	2096.65	1743.88	2065.01	305.356	654	438	4364.6	4396	4528.69	566.627	449.837	434.04
Niben101Scf00110g03003	-	-	IPR010756;	gb|AAT46619.1|	hepatocellular carcinoma-associated antigen 59 [Homo sapiens]	-	-	-	-	83.1407	85.2193	62.8675	104	59	104.583	121	112.326	117.621	59.7884	48.4608	67	206.209	133.196	168	93.5333	59.6275	64.0706
Niben101Scf00110g04016	-	-	IPR029021;	gb|AES61538.2|	metal ion-binding protein [Medicago truncatula]	-	-	-	-	322.938	245.47	230.612	891.257	757	488.95	328.365	339	261.893	231.988	292.736	266.05	251.501	201.176	267	350	373.013	262
Niben101Scf00110g04018	-	-	IPR005031;IPR023393;	ref|WP_025942435.1|	MULTISPECIES: oligoketide cyclase [Prochlorococcus]	-	-	-	-	171	184.988	117.392	81.7452	97.6904	174.596	146.391	211	217	34.861	21	37.8021	232.174	161.334	211.752	46	36.1398	25.8992
Niben101Scf00110g04022	-	-	IPR029021;	gb|AES61538.2|	metal ion-binding protein [Medicago truncatula]	-	-	-	-	1491	1412	1640.79	2372	2707.71	1881.94	1558.3	1706.66	1178	1354.18	1229.29	1222	1053.81	874.847	1204.08	1727.25	1423.79	1133.41
Niben101Scf00110g05007	GO:0006886;GO:0006888;GO:0008270;GO:0030127;	-	IPR002035;IPR006895;IPR006896;IPR006900;IPR012990;IPR029006;	sp|A5DA00|SEC23_PICGU	Protein transport protein SEC23	GO:0006886//intracellular protein transport;GO:0006888//endoplasmic reticulum to Golgi vesicle-mediated transport;	GO:0030127//COPII vesicle coat;	GO:0008270//zinc ion binding;	-	616.294	499	564.419	342.239	442	422.979	607.455	649.543	563.279	232.794	255.96	300	484	641.443	513	611.314	555.376	477.358
Niben101Scf00110g05008	GO:0005524;GO:0006605;GO:0006886;GO:0016020;GO:0017038;	K03070	IPR000185;IPR027417;	sp|C6E178|SECA_GEOSM	Protein translocase subunit SecA	GO:0006605//protein targeting;GO:0006886//intracellular protein transport;GO:0017038//protein import;	GO:0016020//membrane;	GO:0005524//ATP binding;	ko03060(Protein export)	2240.26	2569.05	1400.92	996	1728	2071	2521.62	2226	3274.74	357.977	431.805	445.628	2786	3220.69	2569.57	490	459.353	422.983
Niben101Scf00110g05010	-	-	-	-	Unknown protein	-	-	-	-	0	0	0	0	0	1	0	0	0	1.03926	0	2.20933	0	0	0	0	1	1.16203
Niben101Scf00110g05011	-	K03070	IPR029064;	sp|Q4J8P1|RL7A_SULAC	50S ribosomal protein L7Ae	-	-	-	ko03060(Protein export)	1.84994	2	5.1963	1.86336	35.3493	2.07852	3.11778	1.79621	6	0	17.4305	2	3.24018	1.02279	3.79609	2.10699	2	3.18881
Niben101Scf00110g05012	-	K20027	IPR001594;	tpg|DAA41303.1|	TPA: metal ion binding protein [Zea mays]	-	-	-	-	8.08296	15	6	5.81017	6	10.8006	13.2963	11.3883	20.0164	22	44.6433	53.6483	17	25.9815	13.9752	45.2913	31.1778	38.4526
Niben101Scf00110g05013	GO:0004729;GO:0006779;GO:0016491;GO:0055114;	K00231	IPR004572;IPR016040;IPR027418;	sp|P56601|PPOX_MYXXA	Protoporphyrinogen oxidase	GO:0006779//porphyrin-containing compound biosynthetic process;GO:0055114//obsolete oxidation-reduction process;	-	GO:0004729//oxygen-dependent protoporphyrinogen oxidase activity;GO:0016491//oxidoreductase activity;	ko00860(Porphyrin metabolism)	1410.25	1670.84	1239	975.774	1212.64	1741	1855.08	1877.33	2405.96	801.269	944.687	899.903	1905	1513	2031.24	976	912.65	790.619
Niben101Scf00111g00002	GO:0004794;GO:0009097;	K01754	IPR001926;IPR005787;	sp|P53607|ILVA_BURM1	L-threonine dehydratase biosynthetic IlvA	GO:0009097//isoleucine biosynthetic process;	-	GO:0004794//L-threonine ammonia-lyase activity;	ko00290(Valine, leucine and isoleucine biosynthesis);ko00260(Glycine, serine and threonine metabolism)	55.9008	76.2219	80.023	44.6881	43.1091	77	175	123.176	67	11.8807	21.4786	13.2863	79.0121	64	47.8321	4.62485	2	1.03926
Niben101Scf00111g00009	GO:0006629;GO:0016788;	-	IPR013830;	sp|Q9LZC5|GDL73_ARATH	GDSL esterase/lipase	GO:0006629//lipid metabolic process;	-	GO:0016788//hydrolase activity, acting on ester bonds;	-	0	0	0	0	0	0	0	0	0	0	0	0.93168	0	0	0	0	1	0
Niben101Scf00111g01016	-	K02896	IPR000988;IPR023441;IPR023442;	sp|O65743|RL24_CICAR	60S ribosomal protein L24	-	-	-	ko03010(Ribosome)	390.097	448.611	496	536.258	567.393	658.38	519.63	472.863	520.004	828	1068	1664.03	373	347.779	349.795	800.975	843.849	820
Niben101Scf00111g01017	-	-	IPR004263;	AT5G03795.1	Exostosin family protein LENGTH=518	-	-	-	-	10.3926	3.59243	6	38	24.4027	31	11.8807	8.18234	4.74511	29.4979	52	40.3915	8.32474	14	17.6674	54.0374	72.9079	64.4341
Niben101Scf00111g01018	GO:0004672;GO:0004674;GO:0005524;GO:0006468;GO:0016772;	K08832	IPR011009;	AT3G44850.1	Protein kinase superfamily protein LENGTH=534	GO:0006468//protein phosphorylation;	-	GO:0004672//protein kinase activity;GO:0004674//protein serine/threonine kinase activity;GO:0005524//ATP binding;GO:0016772//transferase activity, transferring phosphorus-containing groups;	-	232.174	142.353	247.571	211	243.412	195.169	344	209.93	183.541	2217.06	2121.13	1474.71	227.221	283	273	1924.33	1415	1580.13
Niben101Scf00111g01019	-	-	IPR001810;IPR025886;	sp|Q9LEX0|P2A13_ARATH	F-box protein PP2-A13	-	-	-	-	263.972	174.224	201.049	727.481	732.678	453.544	371	311	370.689	802	761.442	891.875	92.0552	68.4772	80	607.999	483.76	496
Niben101Scf00111g03006	-	-	IPR007087;	AT3G44750.1	histone deacetylase 3 LENGTH=245	-	-	-	-	411	474.11	359	477.386	562.536	627.304	378.205	325	446.433	280.266	430	505.08	243.168	294.946	272.286	314.896	204.768	209
Niben101Scf00111g04004	GO:0005515;GO:0005634;	K14788	IPR012580;IPR015943;	sp|Q7T0Q5|NOL10_XENLA	Nucleolar protein 10	-	GO:0005634//nucleus;	GO:0005515//protein binding;	-	535	539.971	482.835	605	675.518	556.213	792.045	554.964	579.907	373.612	508	588	524.078	469	489.267	498.1	465.021	478.287
Niben101Scf00111g04007	GO:0004553;GO:0005975;	-	IPR000490;IPR012946;IPR017853;	sp|Q8VYE5|E1312_ARATH	Glucan endo-1,3-beta-glucosidase 12	GO:0005975//carbohydrate metabolic process;	-	GO:0004553//hydrolase activity, hydrolyzing O-glycosyl compounds;	-	1.03926	0	0	0	0	1.16203	0	0	1.02279	0	0	1	6.37761	0	3	0	0	0
Niben101Scf00113g01006	-	-	IPR009003;	ref|WP_031105858.1|	peptidase [Streptomyces sp. NRRL S-146]	-	-	-	-	48.6027	41.9345	30.3687	25.2839	40	35.0769	34.2239	35	63.3948	17.7019	34.2446	37.4133	87.2978	47.5997	61	38	42.9953	55
Niben101Scf00113g02003	-	-	IPR008984;	sp|O14270|FHL1_SCHPO	Fork head transcription factor 1	-	-	-	-	550	604.849	577.641	516.983	563.279	456.235	851.405	766	678	742.54	628	927.771	637.2	539.045	589.957	1065	956.642	875.947
Niben101Scf00113g03001	-	-	-	AT3G25130.1	unknown protein; FUNCTIONS IN: molecular_function unknown; INVOLVED IN: biological_process unknown; LOCATED IN: plasma membrane; EXPRESSED IN: 17 plant structures; EXPRESSED DURING: 9 growth stages; Has 3885 Blast hits to 2658 proteins in 280 species: Archae - 12; Bacteria - 208; Metazoa - 970; Fungi - 222; Plants - 148; Viruses - 11; Other Eukaryotes - 2314 (source: NCBI BLink). LENGTH=406	-	-	-	-	1	6	9.29628	0	2.16012	2.04559	20.8785	6.32097	9	0	2.77491	0	3.11778	1.86336	3.314	1.03926	1.03926	0.898107
Niben101Scf00113g03002	GO:0003677;GO:0003700;GO:0006355;	-	IPR016177;	sp|Q56XP9|ERFL1_ARATH	Ethylene-responsive transcription factor-like protein	GO:0006355//regulation of transcription, DNA-templated;	-	GO:0003677//DNA binding;GO:0003700//DNA-binding transcription factor activity;	-	122.205	137	129.678	168.345	143	96.6511	201.243	106.048	124.711	63.3948	79.9315	66	170	141.768	146	71.2839	74.6639	43.655
Niben101Scf00113g03009	-	-	IPR012643;	sp|Q09020|PR4_PHAVU	Wound-induced basic protein	-	-	-	-	33.14	38.4526	43.6489	25.147	38	47	72.0461	74	76.6842	43.9801	46.5021	58.9957	31	42.5174	46.2485	56	57.1593	40.0622
Niben101Scf00113g04002	-	-	IPR015300;	-	Unknown protein	-	-	-	-	0	0	0	0	0	0	0	0	1	5.1963	3.72672	22.0933	0	0	1.79621	7	3	10.4583
Niben101Scf00113g04003	-	-	IPR015300;	sp|Q6Z3U3|Y7797_ORYSJ	B3 domain-containing protein	-	-	-	-	0	0	0	0	0	0	0	0	0	7	5.81017	4	0	0	0.949023	7.37446	2	3.18881
Niben101Scf00113g04009	-	-	-	ref|XP_007044409.1|	Galact isoform 1 [Theobroma cacao]	-	-	-	-	0	0	0	0	0	0	0	0.949023	0	0	0	0	0	0	0	0	1.03926	0
Niben101Scf00113g04012	GO:0000166;GO:0003676;GO:0005622;GO:0006810;	-	IPR002075;IPR012677;	sp|Q9XJ54|NTF2_ORYSJ	Nuclear transport factor 2	GO:0006810//transport;	GO:0005622//intracellular anatomical structure;	GO:0000166//nucleotide binding;GO:0003676//nucleic acid binding;	-	452.684	505.677	585	659.02	570.707	649	793.994	615.84	795.359	583.024	1061.08	554.132	594	529	773.915	591	484.947	502.191
Niben101Scf00113g04027	GO:0004553;GO:0005975;	-	IPR001000;IPR008979;IPR015300;IPR017853;	sp|Q0H904|XYNC_ASPFU	Endo-1,4-beta-xylanase C	GO:0005975//carbohydrate metabolic process;	-	GO:0004553//hydrolase activity, hydrolyzing O-glycosyl compounds;	-	10.2485	34.2446	13.5104	68.5911	61.0713	36	5	6.97221	2	128.527	91.0285	110.087	5.26747	4	5.31468	71.2227	57	50.9237
Niben101Scf00113g05006	GO:0006621;GO:0016021;GO:0046923;	K10949	IPR000133;	AT3G25160.1	ER lumen protein retaining receptor family protein LENGTH=272	GO:0006621//protein retention in ER lumen;	GO:0016021//integral component of membrane;	GO:0046923//ER retention sequence binding;	-	2891.14	2538	5024.44	1603.74	1573.48	1720.36	5277	2956.02	2785.09	945	866.742	1017.39	1757.52	1642.03	1945.49	1281.6	1245	1044
Niben101Scf00113g05007	-	-	-	-	Unknown protein	-	-	-	-	0	5.54982	1	2.07852	0	2.20933	0	2.07852	0	0	0	0	0	0	0	1.89805	0	3
Niben101Scf00113g05009	GO:0005506;GO:0016705;GO:0020037;GO:0055114;	K17961	IPR001128;	AT5G07990.1	Cytochrome P450 superfamily protein LENGTH=513	GO:0055114//obsolete oxidation-reduction process;	-	GO:0005506//iron ion binding;GO:0016705//oxidoreductase activity, acting on paired donors, with incorporation or reduction of molecular oxygen;GO:0020037//heme binding;	ko00904(Diterpenoid biosynthesis)	1.03926	1.79621	1	14	11.6203	6	2.16012	0	0.949023	1.05349	3	0	0.924971	0	0	0	3.314	1.03926
Niben101Scf00113g05011	-	-	-	-	Unknown protein	-	-	-	-	1.02279	0	0	3	0	0	1	0	1.86336	0	0	0	0	0	1	1.16203	0	1.08006
Niben101Scf00113g06004	GO:0008152;GO:0016758;	-	IPR002213;	AT5G54010.1	UDP-Glycosyltransferase superfamily protein LENGTH=453	GO:0008152//metabolic process;	-	GO:0016758//hexosyltransferase activity;	-	5.1963	4.6584	3.314	2.07852	1.03926	6.28675	12	5	2.32407	0	2.16012	2.04559	15.1844	12.6419	10	2.12587	2.77491	2
Niben101Scf00113g06009	GO:0000079;GO:0006355;GO:0016591;GO:0019901;GO:0051726;	K15161	IPR015429;	sp|Q9FJK7|CCC12_ARATH	Cyclin-C1-2	GO:0000079//regulation of cyclin-dependent protein serine/threonine kinase activity;GO:0006355//regulation of transcription, DNA-templated;GO:0051726//regulation of cell cycle;	GO:0016591//RNA polymerase II, holoenzyme;	GO:0019901//protein kinase binding;	-	124	120.852	87	81.0045	93.0741	122.424	119.045	153	179.636	79.5475	93	99.7689	100.621	100.525	111.201	154.85	128.429	147
Niben101Scf00114g00010	-	K17907	IPR007241;	sp|Q54NA3|ATG9_DICDI	Autophagy-related protein 9	-	-	-	ko04136(Autophagy - other)	367	317.818	251.592	514	522.747	386.647	518.088	363.741	276.443	1197.18	1200	1168	311.425	289	351.019	1338.84	1154.96	1320.03
Niben101Scf00114g00011	GO:0004672;GO:0005515;GO:0005524;GO:0006468;GO:0016772;	-	IPR001611;IPR011009;IPR013210;IPR013320;IPR025875;	AT1G48480.1	receptor-like kinase 1 LENGTH=655	GO:0006468//protein phosphorylation;	-	GO:0004672//protein kinase activity;GO:0005515//protein binding;GO:0005524//ATP binding;GO:0016772//transferase activity, transferring phosphorus-containing groups;	-	46.7667	71.7089	8.08296	32	37	31.3749	7	11.8807	34.7749	0.949023	11.5884	3	100.979	90.6471	99	8.31407	14.9069	11.0467
Niben101Scf00116g01001	-	-	IPR008914;	gb|AFK31163.1|	Hd3a, partial [Oryza rufipogon]	-	-	-	-	10.8006	0	9.49023	1.05349	0	0	13.8746	3	3.11778	2.79504	1.10467	0	0	3.59243	7	1	6.97221	5
Niben101Scf00116g01003	GO:0005515;GO:0008270;	K15601	IPR001841;IPR014977;	sp|Q6EPP9|GRF10_ORYSJ	Growth-regulating factor 10	-	-	GO:0005515//protein binding;GO:0008270//zinc ion binding;	-	130	120.554	68.9443	75.1172	81.0622	112.24	96.0974	110	135	176.629	161	176.05	105.348	95.8513	136.954	87	75.4684	59.1981
Niben101Scf00116g02008	GO:0005337;GO:0006810;GO:0016021;	K15014	IPR002259;IPR020846;	AT4G05110.1	equilibrative nucleoside transporter 6 LENGTH=418	GO:0006810//transport;	GO:0016021//integral component of membrane;	GO:0005337//nucleoside transmembrane transporter activity;	-	112	130	108.069	47	30.2417	33.7522	126.22	124.312	135	9.56642	4.62485	13	50.9237	27.9504	24.3026	11.4319	14.5496	3.59243
Niben101Scf00116g02013	GO:0003824;GO:0051536;	K15865	IPR007197;IPR023970;	sp|A0LV00|MIAB_ACIC1	tRNA-2-methylthio-N(6)-dimethylallyladenosine synthase	-	-	GO:0003824//catalytic activity;GO:0051536//iron-sulfur cluster binding;	-	0	0	0	38.8488	44	22.8637	4.6584	1.10467	3.11778	651.616	813.685	1066	39	31.3749	18	538.95	401.957	374.864
Niben101Scf00116g03003	-	-	IPR000270;	AT4G05150.1	Octicosapeptide/Phox/Bem1p family protein LENGTH=477	-	-	-	-	289.422	134.064	91.4548	35.0262	51	129	110.393	331	456.865	21.4786	9.49023	14.7489	124	138.182	124.871	30	10.3926	18.6336
Niben101Scf00116g04003	-	-	IPR006461;	AT1G11380.1	PLAC8 family protein LENGTH=254	-	-	-	-	106	141.488	75.6866	107.24	84.2796	99	112.671	146.145	137	33.2563	22.3603	15.4653	156.928	161.085	195.787	33	64	66.236
Niben101Scf00116g04008	GO:0005515;GO:0008270;	K13125	IPR016818;IPR027799;	sp|Q6P829|NOSIP_XENTR	Nitric oxide synthase-interacting protein	-	-	GO:0005515//protein binding;GO:0008270//zinc ion binding;	-	381.088	464	468.706	311.181	450.703	373.094	579.907	484.978	509	359	488.055	458	528.149	460.257	503.931	526.747	463	483.635
Niben101Scf00116g05006	-	-	IPR006015;	AT1G11360.1	Adenine nucleotide alpha hydrolases-like superfamily protein LENGTH=242	-	-	-	-	452.646	416	387	508.971	580	522.749	620.835	722.206	781.693	485	567.607	631.755	641	705.657	626.089	1079.26	724.364	709.814
Niben101Scf00116g05007	-	-	-	-	Unknown protein	-	-	-	-	7.59218	8.42796	13	12.7552	8.32474	11	17.6674	17.7019	27.6166	5.1963	11.4319	3.59243	18	13	39.5092	13	12.9607	6.13676
Niben101Scf00116g05010	GO:0005622;GO:0008270;	-	IPR000315;	sp|Q9LJB7|BBX32_ARATH	B-box zinc finger protein 32	-	GO:0005622//intracellular anatomical structure;	GO:0008270//zinc ion binding;	-	33.5405	35.3493	70.6696	226.559	134.716	113	44	89.4767	111	17.281	34.7749	22.7765	72.6911	110	167.944	17.5744	23	15.5889
Niben101Scf00116g06001	GO:0003824;GO:0008762;GO:0016491;GO:0016614;GO:0050660;GO:0055114;	-	IPR012951;IPR016166;	AT4G20860.1	FAD-binding Berberine family protein LENGTH=530	GO:0055114//obsolete oxidation-reduction process;	-	GO:0003824//catalytic activity;GO:0008762//UDP-N-acetylmuramate dehydrogenase activity;GO:0016491//oxidoreductase activity;GO:0016614//oxidoreductase activity, acting on CH-OH group of donors;GO:0050660//flavin adenine dinucleotide binding;	-	12.7824	14	4.32024	11.2507	12.3373	12.6419	4	7.44055	2.77491	26	23.903	36.3355	8.83732	6.23556	10.3926	160.761	137	195
Niben101Scf00116g06002	GO:0003824;GO:0008762;GO:0016491;GO:0016614;GO:0050660;GO:0055114;	-	IPR012951;IPR016166;	AT4G20860.1	FAD-binding Berberine family protein LENGTH=530	GO:0055114//obsolete oxidation-reduction process;	-	GO:0003824//catalytic activity;GO:0008762//UDP-N-acetylmuramate dehydrogenase activity;GO:0016491//oxidoreductase activity;GO:0016614//oxidoreductase activity, acting on CH-OH group of donors;GO:0050660//flavin adenine dinucleotide binding;	-	64.839	80.4725	137	106.004	167.702	69.5939	202.656	125.75	66.4599	76	52	75.5323	33	25.9214	49.094	266.675	288.658	220
Niben101Scf00116g06003	GO:0003824;GO:0008762;GO:0016491;GO:0016614;GO:0050660;GO:0055114;	-	IPR012951;IPR016166;	AT4G20860.1	FAD-binding Berberine family protein LENGTH=530	GO:0055114//obsolete oxidation-reduction process;	-	GO:0003824//catalytic activity;GO:0008762//UDP-N-acetylmuramate dehydrogenase activity;GO:0016491//oxidoreductase activity;GO:0016614//oxidoreductase activity, acting on CH-OH group of donors;GO:0050660//flavin adenine dinucleotide binding;	-	51.963	24.2489	64	40	32.537	20	116.646	43.9801	77.8198	15.8024	16	15.944	73.0727	104	98.7296	24.2237	26.512	31.1778
Niben101Scf00116g06006	GO:0016747;	-	IPR003480;IPR023213;	AT1G32910.1	HXXXD-type acyl-transferase family protein LENGTH=464	-	-	GO:0016747//acyltransferase activity, transferring groups other than amino-acyl groups;	-	0	0	0	0	0	0	0	0	0	0	2.07852	0	0	1	0	2.32407	4	3.24018
Niben101Scf00117g00006	GO:0003735;GO:0005622;GO:0005840;GO:0006412;	K02925	IPR000597;IPR009000;	sp|Q975I1|RL3_SULTO	50S ribosomal protein L3	GO:0006412//translation;	GO:0005622//intracellular anatomical structure;GO:0005840//ribosome;	GO:0003735//structural constituent of ribosome;	ko03010(Ribosome)	1088.1	1198.14	1938.69	1677.36	1466.39	1266.33	2071	1121	1440.92	1152	1321.99	1286.67	1159.71	1050.33	1263	1532.75	1084.07	1073
Niben101Scf00117g00007	GO:0003735;GO:0005840;GO:0006412;	K02926	IPR002136;IPR023574;	sp|B9MKI0|RL4_CALBD	50S ribosomal protein L4	GO:0006412//translation;	GO:0005840//ribosome;	GO:0003735//structural constituent of ribosome;	ko03010(Ribosome)	406	864.554	195	129.607	345.704	564.668	255.999	335	581.425	43.4736	22	67.5518	612.114	661.694	689.029	29.0993	22.4527	31
Niben101Scf00117g01001	-	-	-	emb|CDX94943.1|	BnaC05g07280D [Brassica napus]	-	-	-	-	4	1.06294	0	0	3.11778	0.93168	0	0	2.07852	0	0	0	1.16203	2	4.32024	0	0.949023	0
Niben101Scf00117g01002	-	-	-	AT4G24290.2	MAC/Perforin domain-containing protein LENGTH=606	-	-	-	-	21.8244	15.5889	10.7773	22	20	25.5648	19	27.0015	34.7749	27.5217	35.8188	32	24.4475	11.0996	7	23.903	16.7702	24.3026
Niben101Scf00117g01003	-	-	-	AT4G24290.2	MAC/Perforin domain-containing protein LENGTH=606	-	-	-	-	0	0	0.949023	0	0	0	0	0	0	0	0	0	0	0	0	0	0	0
Niben101Scf00117g02006	GO:0003676;GO:0006139;GO:0008408;	-	IPR012337;	sp|Q84LH3|WEX_ARATH	Werner Syndrome-like exonuclease	GO:0006139//nucleobase-containing compound metabolic process;	-	GO:0003676//nucleic acid binding;GO:0008408//3'-5' exonuclease activity;	-	4	4.15704	4.6584	2.20933	3.11778	6.23556	1.79621	3	3	5.81017	1	7.56042	4.09117	3.79609	4.21398	6	2.12587	0.924971
Niben101Scf00117g02009	GO:0005515;GO:0006810;GO:0006886;GO:0006890;GO:0016192;GO:0030126;GO:0030131;	K20471	IPR011012;IPR027059;IPR028565;	sp|Q93Y22|COPD_ARATH	Coatomer subunit delta	GO:0006810//transport;GO:0006886//intracellular protein transport;GO:0006890//retrograde vesicle-mediated transport, Golgi to endoplasmic reticulum;GO:0016192//vesicle-mediated transport;	GO:0030126//COPI vesicle coat;GO:0030131//clathrin adaptor complex;	GO:0005515//protein binding;	-	1872	1630	1576.88	1242	2016.47	1846.14	1218.54	1644.51	1876	1786.79	1838.84	2335	1696.07	1322.99	1679.09	2176.21	1850.92	1707.3
Niben101Scf00117g02010	-	-	-	-	Unknown protein	-	-	-	-	35.8188	20	14.8811	79.5475	77	108.083	40.0622	18.7793	36.3741	102.887	176.927	78	28	41.8332	42	72.364	62.3903	39.8589
Niben101Scf00117g02017	-	-	-	ref|XP_007041209.1|	Octic , putative isoform 1 [Theobroma cacao]	-	-	-	-	7.73266	6.23556	6.23556	6.28675	3	9	10.4583	6	4.32024	41.9345	42.706	32.6583	0	3.18881	1.84994	54	57.1593	47.5157
Niben101Scf00117g02019	GO:0005524;GO:0006457;GO:0051082;	-	IPR013126;IPR029047;IPR029048;	sp|B2S0M0|DNAK_BORHD	Chaperone protein DnaK	GO:0006457//protein folding;	-	GO:0005524//ATP binding;GO:0051082//unfolded protein binding;	-	3477	4224.11	3107.24	2183.7	3026.69	3983	3573.59	2669.47	3714	1294.92	1684.48	2298.81	5771.01	5961.19	5161.42	1930	1681	1975.46
Niben101Scf00119g01002	-	-	IPR001938;	AT2G28790.1	Pathogenesis-related thaumatin superfamily protein LENGTH=249	-	-	-	-	15.7245	19	2.07852	3.72672	7.73266	15.5889	3.11778	6.28675	9	3	3.4861	1	2.16012	4.09117	10.4392	9.48145	6	7.44055
Niben101Scf00119g02011	-	-	-	ref|XP_002531363.1|	conserved hypothetical protein [Ricinus communis] gb|EEF31011.1| conserved hypothetical protein [Ricinus communis]	-	-	-	-	0	0	0	0	0	0	0	0	0	0	0	0	0	0	0.93168	0	0	0
Niben101Scf00119g02012	GO:0016021;GO:0051205;	K03217	IPR001708;IPR028055;	sp|O25989|YIDC_HELPY	Membrane protein insertase YidC	GO:0051205//protein insertion into membrane;	GO:0016021//integral component of membrane;	-	ko03060(Protein export)	1133.13	1325.3	668	493.202	770.501	1459	882.331	1072.36	1491.3	193.302	229.676	183.214	1399	1373	1770.94	308	302.417	278.2
Niben101Scf00119g03013	-	-	IPR002068;	gb|ACG43350.1|	SLT1 protein [Zea mays]	-	-	-	-	43.7889	64.0706	32.217	15.5889	16.1659	47	40	75.5323	81	9.72054	17.3875	2.84707	76.9051	126	113.734	2.77491	15	13.5104
Niben101Scf00119g03014	-	K03283	IPR019651;	sp|P41755|DHE2_ACHKL	NAD-specific glutamate dehydrogenase	-	-	-	ko04144(Endocytosis);ko04141(Protein processing in endoplasmic reticulum);ko03040(Spliceosome)	0	0	0	0	0.949023	1.05349	1	1.06294	0	1	0	0	1.10467	2.07852	0	0	0	0
Niben101Scf00119g04007	-	-	-	gb|KEH39417.1|	transmembrane protein, putative [Medicago truncatula]	-	-	-	-	26.5734	15.7245	31	18.7067	27.0187	34.2446	27.0207	14.5496	28.7394	46	59	68.56	53	133.927	143.191	103.443	107.456	117
Niben101Scf00119g05010	-	K03283	IPR013126;IPR029047;IPR029048;	sp|P34930|HS71A_PIG	Heat shock 70 kDa protein 1A	-	-	-	ko04144(Endocytosis);ko04141(Protein processing in endoplasmic reticulum);ko03040(Spliceosome)	276.443	244.285	449	473	594.962	468	212.772	128.872	95.8513	244.411	486	430.489	206.268	226	292.032	231.988	192.212	159.007
Niben101Scf00119g05011	-	-	IPR009069;	sp|O13973|MRP10_SCHPO	37S ribosomal protein mrp10, mitochondrial	-	-	-	-	20.4559	20.8785	42.1398	25	25.5104	23.1243	8	12.4711	17.7019	4.41866	10.3926	9.35333	9.87918	12	24	6.97221	9	14.0408
Niben101Scf00119g08004	GO:0003677;GO:0006355;	-	IPR003851;	AT5G02460.1	Dof-type zinc finger DNA-binding family protein LENGTH=399	GO:0006355//regulation of transcription, DNA-templated;	-	GO:0003677//DNA binding;	-	128.868	116.46	89.4779	53.0022	49.8844	116.754	116	120	131.31	14	36.722	22.5014	110.087	174.88	188	25.5104	19.4244	8
Niben101Scf00119g09004	GO:0004842;GO:0005488;GO:0005515;GO:0016567;	-	IPR013083;IPR016024;	sp|Q9C9A6|PUB10_ARATH	U-box domain-containing protein 10	GO:0016567//protein ubiquitination;	-	GO:0004842//ubiquitin-protein transferase activity;GO:0005488//binding;GO:0005515//protein binding;	-	1312	1815.1	910	718.24	1411.45	1362.8	1524.41	1572	1290.4	290.441	255	398.036	652.176	669.427	729.56	407.39	274.821	292
Niben101Scf00120g00001	-	K12832	IPR009846;	sp|Q923D4|SF3B5_MOUSE	Splicing factor 3B subunit 5	-	-	-	ko03040(Spliceosome)	2	2.12587	4.62485	0	1.03926	0.93168	4.41866	1.03926	3.11778	0	0	2	0	0	1.08006	2.04559	0.949023	0
Niben101Scf00120g00010	GO:0004857;GO:0005618;GO:0030599;GO:0042545;	K01051	IPR006501;IPR011050;	sp|Q42920|PME_MEDSA	Pectinesterase/pectinesterase inhibitor	GO:0042545//cell wall modification;	GO:0005618//cell wall;	GO:0004857//enzyme inhibitor activity;GO:0030599//pectinesterase activity;	ko00040(Pentose and glucuronate interconversions)	0	0	0	0	0	0	0	0	0	0	0	0	0	0	0	0	0.93168	0
Niben101Scf00120g00011	GO:0004857;GO:0005618;GO:0030599;GO:0042545;	K01051	IPR006501;IPR011050;	sp|Q43043|PME_PETIN	Pectinesterase	GO:0042545//cell wall modification;	GO:0005618//cell wall;	GO:0004857//enzyme inhibitor activity;GO:0030599//pectinesterase activity;	ko00040(Pentose and glucuronate interconversions)	0	0	0	0	0	0	0	0	0	0	0	0	0	0.898107	0	3	3.4861	1
Niben101Scf00120g00012	GO:0003995;GO:0008152;GO:0016627;GO:0016772;GO:0050660;GO:0055114;	K00249	IPR009075;IPR009100;IPR011009;IPR013786;	AT3G06810.1	acyl-CoA dehydrogenase-related LENGTH=824	GO:0008152//metabolic process;GO:0055114//obsolete oxidation-reduction process;	-	GO:0003995//acyl-CoA dehydrogenase activity;GO:0016627//oxidoreductase activity, acting on the CH-CH group of donors;GO:0016772//transferase activity, transferring phosphorus-containing groups;GO:0050660//flavin adenine dinucleotide binding;	ko00280(Valine, leucine and isoleucine degradation);ko00071(Fatty acid degradation)	1785	1426.9	1408.7	1475.83	1620.21	1592.15	2069.24	2219	2356	1910.38	1839	2035.91	1840	1546.91	1912.09	2035	1994.07	1684.37
Niben101Scf00120g01002	-	-	IPR029069;	AT1G48320.1	Thioesterase superfamily protein LENGTH=156	-	-	-	-	0	4	0	0	2.16012	1.02279	0	3.16048	1	2.12587	0	2	0	0	0	5.1963	0	0
Niben101Scf00120g01009	-	-	-	-	Unknown protein	-	-	-	-	22.1234	22	23.3846	37.9238	53	37.4133	27.9504	12.1513	13.5104	684.872	636.758	1404	32	48.8055	19	610.234	530.829	505.829
Niben101Scf00120g01010	GO:0006629;GO:0016021;GO:0016705;GO:0030148;	K04712	IPR011388;	sp|Q6H5U3|DES1L_ORYSJ	Sphingolipid delta(4)-desaturase DES1-like	GO:0006629//lipid metabolic process;GO:0030148//sphingolipid biosynthetic process;	GO:0016021//integral component of membrane;	GO:0016705//oxidoreductase activity, acting on paired donors, with incorporation or reduction of molecular oxygen;	ko00600(Sphingolipid metabolism)	65.1752	33.2563	21.8244	26.9432	73	106	48.8055	41	60.4833	14.3191	16.1334	11.5884	12	9.56642	17.5744	22	14.5496	18.6336
Niben101Scf00120g02005	-	-	-	ref|XP_007025678.1|	Clathrin light chain protein isoform 2 [Theobroma cacao] gb|EOY28300.1| Clathrin light chain protein isoform 2 [Theobroma cacao]	-	-	-	-	14	22.6813	17.3875	15.1844	22.1234	8	23.3846	24.9742	14	25.9815	35.4038	34.2446	24.9422	19.7459	10.7773	50	39	34.861
Niben101Scf00120g02006	GO:0004672;GO:0004674;GO:0005524;GO:0006468;GO:0016772;	K04733	IPR011009;IPR013320;	sp|Q9LIG2|RLK6_ARATH	Receptor-like protein kinase	GO:0006468//protein phosphorylation;	-	GO:0004672//protein kinase activity;GO:0004674//protein serine/threonine kinase activity;GO:0005524//ATP binding;GO:0016772//transferase activity, transferring phosphorus-containing groups;	-	285.816	335	287.875	247.827	367.853	343.995	354.387	297.273	409	271	368.365	392	335.899	317.066	377.711	305.513	337	309.314
Niben101Scf00120g02008	-	-	IPR000644;	AT5G53750.1	CBS domain-containing protein LENGTH=408	-	-	-	-	13.4716	16	4	18.5926	8	23.7613	5.11396	15.1844	14.7489	1	8.50348	4.62485	1	4.15704	0.93168	8.83732	2.07852	5.1963
Niben101Scf00120g02013	GO:0005198;GO:0006886;GO:0016192;GO:0030130;GO:0030132;	-	IPR000996;	sp|Q9SKU1|CLC1_ARATH	Clathrin light chain 1	GO:0006886//intracellular protein transport;GO:0016192//vesicle-mediated transport;	GO:0030130//clathrin coat of trans-Golgi network vesicle;GO:0030132//clathrin coat of coated pit;	GO:0005198//structural molecule activity;	-	83.514	84.2796	58	98.853	114.696	117	114.319	93.168	106.048	251.501	290.993	197.584	77	63	97.6109	384	273.255	284.336
Niben101Scf00121g00019	-	K14753	IPR015943;IPR020472;	sp|Q8SRB0|GBLP_ENCCU	Guanine nucleotide-binding protein subunit beta-like protein	-	-	-	-	364.287	383.319	524.826	637.066	518.208	522	497	410.198	412	621.034	870.396	755.422	463.538	300	393.286	857.448	819	917.666
Niben101Scf00121g00020	-	K10999	-	-	Unknown protein	-	-	-	-	56.9397	80	42.1223	34.7749	32.2668	51.6212	56	27.6363	29.5991	19	27.0207	50.3107	32.0353	34.2956	38.4526	60.1732	71	51
Niben101Scf00121g00024	-	-	-	-	Unknown protein	-	-	-	-	12.7552	10.1747	18	12.4711	11.1802	23.198	55.0807	24.9422	26.9432	51	26	30.2129	24	18.361	27.6154	52.1962	50.5677	49
Niben101Scf00121g00025	-	-	-	ref|XP_003631077.1|	GPI-anchored protein, putative [Medicago truncatula] gb|ABE80139.1| hypothetical protein MtrDRAFT_AC139526g8v2 [Medicago truncatula] gb|AET05553.1| transmembrane protein, putative [Medicago truncatula]	-	-	-	-	90.4156	77.2372	39	13	23.2407	55	25.9214	51.1396	89.2081	8.42796	4	10.6294	64.748	102	88.337	5.59008	4.41866	7.27481
Niben101Scf00121g00028	GO:0003924;GO:0005525;	K03267	IPR000795;IPR027417;	sp|Q32PH8|EF1A2_BOVIN	Elongation factor 1-alpha 2	-	-	GO:0003924//GTPase activity;GO:0005525//GTP binding;	ko03015(mRNA surveillance pathway)	412.185	335.005	434.04	419	621.817	329.29	501	435.45	436.958	341.342	351.27	481.177	312.541	409	383	483.406	347	412.583
Niben101Scf00123g00004	GO:0016491;GO:0016706;GO:0055114;	-	IPR005123;IPR027443;	sp|Q945B4|AOP3L_ARATH	2-oxoglutarate-dependent dioxygenase AOP3	GO:0055114//obsolete oxidation-reduction process;	-	GO:0016491//oxidoreductase activity;GO:0016706//2-oxoglutarate-dependent dioxygenase activity;	-	3.11778	0	2.20933	0	1.03926	0	5	1	2.32407	4	0	1.02279	0.949023	0	1	1.06294	0	0
Niben101Scf00123g00006	GO:0016491;GO:0016706;GO:0055114;	-	IPR005123;IPR027443;	sp|Q84MB3|ACCH1_ARATH	1-aminocyclopropane-1-carboxylate oxidase homolog 1	GO:0055114//obsolete oxidation-reduction process;	-	GO:0016491//oxidoreductase activity;GO:0016706//2-oxoglutarate-dependent dioxygenase activity;	-	1	0	2	6.48036	8.18234	2.84707	1.05349	0	0	3.69988	6	9.35333	0.93168	2.20933	2.07852	9.35333	2.69432	6
Niben101Scf00123g01001	GO:0015078;GO:0015991;GO:0033177;GO:0033179;	K03661	IPR000245;IPR002379;	sp|Q99437|VATO_HUMAN	V-type proton ATPase 21 kDa proteolipid subunit	-	GO:0033177//proton-transporting two-sector ATPase complex, proton-transporting domain;GO:0033179//proton-transporting V-type ATPase, V0 domain;	GO:0015078//proton transmembrane transporter activity;	ko04145(Phagosome);ko00190(Oxidative phosphorylation)	816	693.034	713.152	716	816.858	777.021	884.837	814.779	909.352	572.992	706	941	719.299	595	720.4	765.049	630.151	646.846
Niben101Scf00123g01002	GO:0016491;GO:0016706;GO:0055114;	-	IPR005123;IPR027443;	sp|Q945B4|AOP3L_ARATH	2-oxoglutarate-dependent dioxygenase AOP3	GO:0055114//obsolete oxidation-reduction process;	-	GO:0016491//oxidoreductase activity;GO:0016706//2-oxoglutarate-dependent dioxygenase activity;	-	1.03926	0	0	0	2	0	3	0	0	0	0	0	0	0	1	0	0.93168	0
Niben101Scf00123g01003	GO:0008152;GO:0070569;	-	IPR002618;	sp|P19595|UGPA_SOLTU	UTP--glucose-1-phosphate uridylyltransferase	GO:0008152//metabolic process;	-	GO:0070569//uridylyltransferase activity;	-	22.6813	9.20513	10.4392	7.37446	6	15.944	21.2743	12	22.8637	8.38512	6.62799	5.1963	19.7459	22.4527	32	11	4.64814	11
Niben101Scf00123g04001	-	-	IPR029058;	AT2G40095.1	Alpha/beta hydrolase related protein LENGTH=209	-	-	-	-	260	224.48	230.125	264.015	301.385	365.819	322.42	256	262	95.2868	102	120.967	133.986	104.392	142.222	171	177.51	131.346
Niben101Scf00123g04002	-	-	IPR006946;	ref|NP_001053190.1|	product [Oryza sativa Japonica Group]	-	-	-	-	21	24	5.81017	0	19.4411	6.13676	0	2.10699	79	0	0	0	44.6881	43.7889	49.7099	0	0	0
Niben101Scf00123g04003	GO:0005506;GO:0009055;GO:0020037;	K00413	IPR002326;	sp|P25076|CY11_SOLTU	Cytochrome c1-1, heme protein, mitochondrial	-	-	GO:0005506//iron ion binding;GO:0009055//electron transfer activity;GO:0020037//heme binding;	ko00190(Oxidative phosphorylation)	1101.96	1017	1132.03	794.55	1044	1092.26	1167.39	1149.96	1010.16	399.076	379.899	356	963	881.984	897	476.306	360.023	290.401
Niben101Scf00123g06010	GO:0005506;GO:0016705;GO:0020037;GO:0055114;	K15639	IPR001128;	AT2G26710.1	Cytochrome P450 superfamily protein LENGTH=520	GO:0055114//obsolete oxidation-reduction process;	-	GO:0005506//iron ion binding;GO:0016705//oxidoreductase activity, acting on paired donors, with incorporation or reduction of molecular oxygen;GO:0020037//heme binding;	ko00905(Brassinosteroid biosynthesis)	0	0	0	0	0	0	0	0	0	0	0	0	0	1.06294	0.924971	1	2.07852	0.93168
Niben101Scf00123g06011	GO:0004129;GO:0005740;	K02265	IPR002124;	sp|Q9SSB8|CX5B2_ARATH	Cytochrome c oxidase subunit 5b-2, mitochondrial	-	GO:0005740//mitochondrial envelope;	GO:0004129//cytochrome-c oxidase activity;	ko00190(Oxidative phosphorylation)	530	556.231	674.02	737.391	696.36	749	808.894	616.956	575	740.992	777.021	952.221	442.724	353.348	376.307	1050	870	979.595
Niben101Scf00123g06014	GO:0009055;GO:0015035;GO:0045454;	K07390	IPR004480;IPR012336;	AT3G15660.1	glutaredoxin 4 LENGTH=169	GO:0045454//cell redox homeostasis;	-	GO:0009055//electron transfer activity;GO:0015035//protein-disulfide reductase activity;	-	433.811	468	485.334	395.964	526.925	571.593	463.51	372.714	442	612	790.184	863	439.584	344.681	387.201	629.99	458	484.698
Niben101Scf00123g06023	-	-	IPR012866;IPR013083;	AT3G24740.1	Protein of unknown function (DUF1644) LENGTH=354	-	-	-	-	297.273	500	280	463.652	521	430.944	396.843	327.413	268.641	194	172.195	135.971	262	192.263	220.808	229.77	175.635	186.027
Niben101Scf00123g06028	GO:0005198;GO:0016226;GO:0051536;	-	IPR000361;IPR016092;	sp|A1TYH3|ERPA_MARHV	Iron-sulfur cluster insertion protein ErpA	GO:0016226//iron-sulfur cluster assembly;	-	GO:0005198//structural molecule activity;GO:0051536//iron-sulfur cluster binding;	-	390.048	499.356	465	586.74	521.684	455	375.173	346.585	342.446	413.625	343.995	339.484	358	371	481.082	391	396.382	302.747
Niben101Scf00123g06029	-	K06130	IPR029058;	sp|Q9QYL8|LYPA2_RAT	Acyl-protein thioesterase 2	-	-	-	ko00564(Glycerophospholipid metabolism)	25.1554	35.3493	16.6281	7.27481	15.2678	37	10	45.3194	51	5.4003	2.04559	4.74511	53.7282	59	57.3985	0	2	0
Niben101Scf00124g00011	GO:0005488;	K03456	IPR016024;	sp|Q8VI02|PP4R1_RAT	Serine/threonine-protein phosphatase 4 regulatory subunit 1	-	-	GO:0005488//binding;	ko03015(mRNA surveillance pathway)	1385.15	831	918.051	981.881	934.787	1100.9	945	1086.32	1051.69	907	1273.09	950.313	971.001	816.858	858.428	1012.17	900	955
Niben101Scf00124g00012	-	-	-	emb|CDX68206.1|	BnaA07g22460D [Brassica napus]	-	-	-	-	445.37	425.487	201	75.8659	199.379	681.578	354.387	403.233	538.864	24	11	32.537	692	673.957	693.453	16.1334	28.4444	36
Niben101Scf00124g00014	-	-	-	AT1G49050.1	Eukaryotic aspartyl protease family protein LENGTH=583	-	-	-	-	513.394	400.556	462	402	617.04	515	652.356	570.718	350.189	550.978	692	642.013	379.238	341	497.805	375.467	418.668	323.21
Niben101Scf00125g01014	-	-	-	-	Unknown protein	-	-	-	-	0	0	0	0	0	0	0	0	0	0	1.03926	1.03926	0	0	0	0	0	0
Niben101Scf00125g01015	-	-	IPR006041;	AT2G47540.1	Pollen Ole e 1 allergen and extensin family protein LENGTH=173	-	-	-	-	0	0	1.10467	1.03926	2.07852	4.49053	0	0	0	11	11.8807	23.5242	0	0	0	11.6923	4.62485	9
Niben101Scf00125g01016	GO:0008152;GO:0015969;GO:0016597;	-	IPR002912;IPR007685;IPR012675;	sp|O54408|RELA_BACSU	GTP pyrophosphokinase	GO:0008152//metabolic process;GO:0015969//guanosine tetraphosphate metabolic process;	-	GO:0016597//amino acid binding;	-	922	744.864	340	130.687	274.108	625.406	533.068	796	1060.81	47.1735	87	47.8059	374.535	578.845	545.611	87.2978	59.2751	73
Niben101Scf00126g00008	-	-	IPR001938;	AT1G77700.1	Pathogenesis-related thaumatin superfamily protein LENGTH=356	-	-	-	-	4	12.7552	12.0246	7	7.27481	10.2485	8.83732	10.3926	16.6281	11.6754	53	12	11.6203	12	16.2009	230.128	144.251	127.473
Niben101Scf00126g01010	-	K05749	IPR008081;	sp|Q6GQD1|CYFP2_XENLA	Cytoplasmic FMR1-interacting protein 2	-	-	-	-	485.334	639.144	268.534	258	306	483.406	351	486.027	580.946	193.601	242.304	221	392.223	266.392	397	134.064	122.982	131.455
Niben101Scf00126g03005	GO:0016020;	K17080	IPR001107;	AT5G40770.1	prohibitin 3 LENGTH=277	-	GO:0016020//membrane;	-	-	37.8021	35.7977	39.8589	49.5143	69	52.0838	50.8734	47	34.2956	43.7889	27.6166	49.8844	47.8059	35.9243	47	52	51.1295	42
Niben101Scf00126g03011	-	-	IPR019378;	AT1G38131.1	O-fucosyltransferase family protein LENGTH=589	-	-	-	-	4	11.4319	1.86336	23.198	20.7852	22.8637	8.08296	20	6	22.0787	10	27.0015	5.11396	3.79609	4.21398	16	8.50348	12.9496
Niben101Scf00126g04003	-	-	IPR000008;	AT3G16510.1	Calcium-dependent lipid-binding (CaLB domain) family protein LENGTH=360	-	-	-	-	12	10	40.6712	20	16.2009	18.4103	93.0042	68.4772	99	2.12587	8.32474	8	71.7089	49.379	78.4312	5.1963	7.27481	2.69432
Niben101Scf00126g04006	GO:0003950;GO:0046872;	-	IPR007087;IPR012317;	AT1G75710.1	C2H2-like zinc finger protein LENGTH=462	-	-	GO:0003950//NAD+ ADP-ribosyltransferase activity;GO:0046872//metal ion binding;	-	1.05349	0	0	0.924971	0	0	0	1.10467	1.03926	0	0.898107	2	0	0	3	1.08006	2.04559	0
Niben101Scf00126g05007	GO:0004672;GO:0005524;GO:0006468;GO:0016772;	K08866	IPR011009;	AT1G77720.1	putative protein kinase 1 LENGTH=777	GO:0006468//protein phosphorylation;	-	GO:0004672//protein kinase activity;GO:0005524//ATP binding;GO:0016772//transferase activity, transferring phosphorus-containing groups;	-	19.884	28.06	17.6674	10.7773	19	24	26.7268	17	22.6813	16.3647	11.3883	38.9793	22	13.8182	14.7995	30	21.8244	25.1554
Niben101Scf00126g06014	GO:0004077;GO:0006464;	K01942	IPR004408;	sp|F4I4W2|HCS2_ARATH	Biotin--protein ligase 2	GO:0006464//cellular protein modification process;	-	GO:0004077//biotin-[acetyl-CoA-carboxylase] ligase activity;	ko00780(Biotin metabolism)	120	131.767	103.302	62.6355	99.0285	117	105.231	102.672	117	69.6304	87.5779	76.2219	126.79	125.75	156.271	96	107	123.176
Niben101Scf00126g06015	-	K20456	IPR000648;IPR011993;	sp|Q8L751|ORP1C_ARATH	Oxysterol-binding protein-related protein 1C	-	-	-	-	1759.29	2007	1776.09	1173.92	1651.47	1806.23	3267.43	2106.06	1938	490	704.193	517	2639.67	2257.3	2555.72	1227.32	998	964.082
Niben101Scf00126g07003	GO:0016307;GO:0046488;	K00889	IPR002498;IPR003409;IPR023610;IPR027483;IPR027484;	sp|Q56YP2|PI5K1_ARATH	Phosphatidylinositol 4-phosphate 5-kinase 1	GO:0046488//phosphatidylinositol metabolic process;	-	GO:0016307//phosphatidylinositol phosphate kinase activity;	ko04144(Endocytosis);ko04070(Phosphatidylinositol signaling system);ko00562(Inositol phosphate metabolism)	105.079	101	96	40.6712	62	83.1646	75.6866	93.0042	150.65	39	79.7201	20.3494	277	328.406	278.572	150.234	153.81	135.104
Niben101Scf00127g00001	-	K10867	IPR008984;	sp|Q0H8D7|NBS1_ARATH	Nijmegen breakage syndrome 1 protein	-	-	-	ko03440(Homologous recombination)	261.93	240.197	256	268.923	300.615	243	417.782	261.802	281.69	915.587	1110.97	847.813	155	145	228.921	630	569.191	611.63
Niben101Scf00127g00008	-	-	IPR025322;	emb|CDX89594.1|	BnaC04g36130D [Brassica napus]	-	-	-	-	11.1802	5.52333	5.1963	5.1963	10.7773	11	9	4.64814	12	17.281	20.4559	15.1844	11.5884	11	15.944	24.9742	16	20.7852
Niben101Scf00127g00011	GO:0004672;GO:0004674;GO:0005524;GO:0006468;GO:0016772;	-	IPR011009;	sp|Q9FN94|RLK7_ARATH	Receptor-like protein kinase	GO:0006468//protein phosphorylation;	-	GO:0004672//protein kinase activity;GO:0004674//protein serine/threonine kinase activity;GO:0005524//ATP binding;GO:0016772//transferase activity, transferring phosphorus-containing groups;	-	10.4583	10	11.8807	3.06838	6.64316	7.37446	12	8.50348	3.69988	47	53.0022	68.9443	4.41866	3.11778	5.1963	28.7394	31	42
Niben101Scf00127g01001	-	-	-	-	Unknown protein	-	-	-	-	111.608	107.297	98	179.792	87.5779	89.4779	222.401	104.965	82.6258	36	77	88.3146	86	69.1238	84.8918	93.0042	88.4936	91
Niben101Scf00127g01004	GO:0008271;GO:0008272;GO:0016020;GO:0055085;GO:1902358;	K17471	IPR001902;	sp|O04289|SUT32_ARATH	Sulfate transporter 3.2	GO:0008272//sulfate transport;GO:0055085//transmembrane transport;GO:1902358//sulfate transmembrane transport;	GO:0016020//membrane;	GO:0008271//secondary active sulfate transmembrane transporter activity;	-	38.4526	20.6565	19	13	5.81017	24	61.5634	28.6382	37.9609	105.349	192	98.853	24.0492	54	40.5311	74.5344	83.9545	83.1407
Niben101Scf00127g01005	GO:0005198;GO:0005515;GO:0006886;GO:0016192;GO:0030117;	K17302	IPR016453;	AT1G52360.2	Coatomer, beta' subunit LENGTH=970	GO:0006886//intracellular protein transport;GO:0016192//vesicle-mediated transport;	GO:0030117//membrane coat;	GO:0005198//structural molecule activity;GO:0005515//protein binding;	-	1946.37	1676.92	1860.47	1679	1903.72	1495.68	1617	1553.69	1555.91	766.638	1015.36	859.467	1233.1	1151	1380	1315.42	1037	1051.98
Niben101Scf00127g01006	-	-	-	gb|KEH20531.1|	transcription factor [Medicago truncatula]	-	-	-	-	59.2378	51.2424	70.6986	24.9422	30.1385	52.9883	111	55	73.2082	35	55.083	37.8433	104.392	167.506	180	44.6433	38.8488	38
Niben101Scf00127g01008	-	K20318	IPR019185;	sp|Q55E69|SYS1_DICDI	Protein SYS1 homolog	-	-	-	-	131	153.389	106	162.009	149.328	141.404	172.773	138	122.238	91.5721	130	117.436	64.2859	106.048	130.947	112.24	119.448	107
Niben101Scf00127g03002	-	-	-	sp|A2BRV3|APT_PROMS	Adenine phosphoribosyltransferase	-	-	-	-	662	716.418	527.233	702	798.151	769.567	919.081	722.285	859.467	634.063	893	1218	1046.99	897	1006.62	830.508	674.755	729.018
Niben101Scf00127g03003	-	-	-	-	Unknown protein	-	-	-	-	37.4133	27.0207	19.7584	16	20	32.537	64	52.9229	47.0485	12.3373	10.5349	10	41.4545	22.1993	42	14.5496	7.45344	14.3606
Niben101Scf00127g03004	-	-	IPR002885;IPR011990;	sp|Q9SXD8|PPR90_ARATH	Pentatricopeptide repeat-containing protein	-	-	-	-	143.648	103.302	69.2786	41.0863	54	77.5943	127.646	110	112.24	17.7019	27.6166	24.9422	98.7296	101.486	94	38	44.1573	49
Niben101Scf00127g04004	-	K09489	IPR013126;IPR029047;IPR029048;	sp|Q5B2V1|HSP70_EMENI	Heat shock 70 kDa protein	-	-	-	-	3187	3275.75	3566.47	6241.36	6075.51	4145.61	2726.65	2553	2694	3691.78	4386	5794.52	2643.92	2183.7	2456.75	3720	3451.35	2998.76
Niben101Scf00127g04010	-	K09489	IPR013126;IPR029047;IPR029048;	sp|Q9S9N1|HSP7E_ARATH	Heat shock 70 kDa protein 5	-	-	-	-	2995	3417	3774.29	7026	8655.6	4920.65	1829.72	2361.94	1729	4873.56	5357.43	5258	1415.47	1149.69	1396.3	2504.61	1886.26	1728.86
Niben101Scf00128g00003	-	-	-	emb|CDX86439.1|	BnaA06g31560D [Brassica napus]	-	-	-	-	55.8352	52	28.6992	9.24971	6	30.1385	65.2176	57.4426	94.5726	53.0022	38.6186	108	84	133.634	170	47.5226	47.0485	46.5021
Niben101Scf00128g01010	-	K17868	IPR015943;	ref|XP_002511374.1|	nucleotide binding protein, putative [Ricinus communis] gb|EEF51976.1| nucleotide binding protein, putative [Ricinus communis]	-	-	-	-	13.256	5.1963	5.1963	6.28675	9	11	9.29628	4	7.56042	16.3647	9.49023	15.8024	5	2.12587	4.62485	2	3.11778	0
Niben101Scf00128g01011	-	-	IPR005135;	sp|Q9FUR2|IP5P2_ARATH	Type I inositol 1,4,5-trisphosphate 5-phosphatase 2	-	-	-	-	211	228.973	214.786	268.573	144.329	187	244.475	193.319	366	55.0807	113.665	61.8612	791.916	950.922	818.175	181	154	130.148
Niben101Scf00128g02002	-	-	-	emb|CDX85195.1|	BnaC07g25060D [Brassica napus]	-	-	-	-	10.1747	11	4.15704	40.0622	39.7679	19.7459	7.27481	10.7773	12	8	8.13424	10	9.72054	12.2735	15.1844	7.37446	13	4.25174
Niben101Scf00128g02005	-	-	IPR008480;	ref|XP_007032367.1|	Membrane lipoprotein, putative [Theobroma cacao] gb|EOY03293.1| Membrane lipoprotein, putative [Theobroma cacao]	-	-	-	-	2.69432	4	2	0	2	5.4003	2.04559	3.79609	1.05349	3	1.06294	0	1	4.15704	3.72672	1.10467	1.03926	1.03926
Niben101Scf00128g02010	GO:0004672;GO:0005515;GO:0005524;GO:0006468;GO:0016772;	-	IPR001611;IPR011009;IPR013210;IPR025875;	sp|Q9LHP4|RCH2_ARATH	Receptor-like protein kinase 2	GO:0006468//protein phosphorylation;	-	GO:0004672//protein kinase activity;GO:0005515//protein binding;GO:0005524//ATP binding;GO:0016772//transferase activity, transferring phosphorus-containing groups;	-	1021.15	1215.73	1321	1535.94	1075.74	1053	1703.35	1168.33	1133.39	1962.12	2515.01	1612.1	887	909	1273.59	1906	1706.49	1770.45
Niben101Scf00128g03003	GO:0016491;GO:0016706;GO:0055114;	K00472	IPR005123;	sp|P16924|P4HA1_CHICK	Prolyl 4-hydroxylase subunit alpha-1	GO:0055114//obsolete oxidation-reduction process;	-	GO:0016491//oxidoreductase activity;GO:0016706//2-oxoglutarate-dependent dioxygenase activity;	ko00330(Arginine and proline metabolism)	0	0	0	1.03926	0	0	0	0	0	1.08006	0	0	0	0	0	0	0	0
Niben101Scf00128g03004	GO:0008152;GO:0016746;	-	IPR002123;IPR023214;	sp|O80437|GPAT6_ARATH	Glycerol-3-phosphate 2-O-acyltransferase 6	GO:0008152//metabolic process;	-	GO:0016746//acyltransferase activity;	-	0	0	0	0	0	0	2	0	0.924971	1	0	0	0	0	2.07852	0.898107	0	3
Niben101Scf00128g03005	-	-	-	ref|XP_002517439.1|	serine/threonine protein kinase, putative [Ricinus communis] gb|EEF44981.1| serine/threonine protein kinase, putative [Ricinus communis]	-	-	-	-	5.31468	12.9496	9	3.11778	2.79504	6.62799	5.1963	3.11778	4.49053	3	2	3.4861	4	1.08006	2.04559	0	2.10699	1
Niben101Scf00128g03011	-	-	IPR009769;	AT1G59650.1	Protein of unknown function (DUF1336) LENGTH=492	-	-	-	-	1167.09	1004.98	758	1024	1719.81	1016	884.569	982.904	768.708	498.303	504	474.069	386.638	623	723.324	691.306	799.778	646.419
Niben101Scf00128g03019	-	-	-	AT3G02130.1	receptor-like protein kinase 2 LENGTH=1151	-	-	-	-	0	4.74511	1.05349	3	6.37761	1.84994	0	0	4.6584	41.9773	37.4133	50.9237	0.898107	0	0	5.81017	8	8.64048
Niben101Scf00128g04005	-	-	IPR000375;IPR022812;	sp|Q9FNX5|DRP1E_ARATH	Dynamin-related protein 1E	-	-	-	-	133.025	160.249	107.153	101.847	152.771	159.863	111	117	168.495	194	218.172	303.769	124.322	121.152	164	331.636	242.342	304
Niben101Scf00128g04006	-	K08900	IPR003959;IPR025753;IPR027417;	sp|P73437|FTSH4_SYNY3	ATP-dependent zinc metalloprotease FtsH 4	-	-	-	-	765	2324.07	658	902.93	1823.64	790.536	460.377	491	254.041	599.381	337	403.233	203.106	247.445	269.168	490.53	430.193	366
Niben101Scf00128g05001	-	K13024	IPR029033;	sp|Q9VR59|VIP1_DROME	Inositol hexakisphosphate and diphosphoinositol-pentakisphosphate kinase	-	-	-	ko04070(Phosphatidylinositol signaling system)	348	550.6	276.566	429	470.784	338.2	605.356	382.447	428.175	483.181	700	491	823.883	650	654.516	620.835	544.739	657.381
Niben101Scf00128g05002	GO:0008375;GO:0016020;	-	IPR003406;	AT5G15050.1	Core-2/I-branching beta-1,6-N-acetylglucosaminyltransferase family protein LENGTH=434	-	GO:0016020//membrane;	GO:0008375//acetylglucosaminyltransferase activity;	-	438.567	434.41	257.757	361	625	670.494	287	309.977	257.744	71.1767	99.0285	105	235.972	217.368	232	153.81	89.4413	102.734
Niben101Scf00128g05004	-	-	IPR002885;IPR011990;	sp|Q9M907|PP217_ARATH	Pentatricopeptide repeat-containing protein	-	-	-	-	258.134	225.014	128.118	161.185	247	296.559	172.97	222	379.33	95.963	128.141	157.967	225.519	212.851	253	73	75.5323	59
Niben101Scf00128g05005	-	-	IPR007679;IPR008999;	emb|CDY45142.1|	BnaA09g14500D [Brassica napus]	-	-	-	-	26	47.8059	25.1554	75.1172	147.575	54.0415	19.7584	11	6	410.198	275	543.27	15.3419	4.74511	6.32097	118	122.238	132.271
Niben101Scf00128g05008	-	-	IPR004883;	sp|Q9STS6|LBD27_ARATH	LOB domain-containing protein 27	-	-	-	-	0	0	0	0	0	0	0	2.10699	0	2.12587	1.84994	0	1.03926	0.93168	0	0	0	0
Niben101Scf00129g00001	-	-	IPR011598;	sp|Q9SND4|HEC2_ARATH	Transcription factor HEC2	-	-	-	-	0	0	1.06294	0	0	0	0	0	0	0	0	0	0	0	0	0	0	0
Niben101Scf00129g01001	GO:0004672;GO:0004674;GO:0005524;GO:0006468;GO:0016772;	-	IPR011009;	sp|Q9LIG2|RLK6_ARATH	Receptor-like protein kinase	GO:0006468//protein phosphorylation;	-	GO:0004672//protein kinase activity;GO:0004674//protein serine/threonine kinase activity;GO:0005524//ATP binding;GO:0016772//transferase activity, transferring phosphorus-containing groups;	-	151.339	168.36	146.536	37.7205	115	139	230.083	172	333.738	21.4786	16.1334	9.48145	306	308.251	289.516	40	28.06	27.0187
Niben101Scf00130g01018	-	-	-	-	Unknown protein	-	-	-	-	25	15.1208	10.2279	15.1844	8.42796	29	36.1398	22.1993	29	14.5496	31.6771	23.198	32.217	25.9815	15.2678	46	31	32.537
Niben101Scf00130g01022	GO:0005488;	-	IPR016024;	sp|Q5U241|PD5BB_XENLA	Sister chromatid cohesion protein PDS5 homolog B-B	-	-	GO:0005488//binding;	-	896.297	953	902.077	842.238	1136.7	850.114	1351.04	819.073	939	1253	1981.27	1946	1166.46	1179.28	1173.94	1745.64	1515	1596.53
Niben101Scf00130g01023	GO:0003676;GO:0003677;GO:0005634;GO:0006355;	K13103	IPR000467;IPR022159;IPR022783;	sp|Q0IIX9|TFP11_XENTR	Tuftelin-interacting protein 11	GO:0006355//regulation of transcription, DNA-templated;	GO:0005634//nucleus;	GO:0003676//nucleic acid binding;GO:0003677//DNA binding;	-	642.146	607	582	727.434	836	748.481	883.693	774.402	627.883	716	993.844	824.149	604	611.084	567.393	1257.11	1039.26	1001.85
Niben101Scf00130g01025	GO:0005515;GO:0005634;GO:0006355;	K03130	IPR006594;IPR007582;IPR015943;IPR020472;	ref|XP_003603301.1|	Transcription initiation factor TFIID subunit [Medicago truncatula]	GO:0006355//regulation of transcription, DNA-templated;	GO:0005634//nucleus;	GO:0005515//protein binding;	ko03022(Basal transcription factors)	216.377	265.481	281	261.482	244.192	292	392.84	345.653	376.691	410.507	531.061	373.612	299	282	339.314	598	529.229	541.057
Niben101Scf00130g03001	GO:0000159;GO:0005488;GO:0007165;GO:0008601;	K11584	IPR002554;IPR016024;	sp|Q93YV6|2A5I_ARATH	Serine/threonine protein phosphatase 2A 57 kDa regulatory subunit B' iota isoform	GO:0007165//signal transduction;	GO:0000159//protein phosphatase type 2A complex;	GO:0005488//binding;	ko03015(mRNA surveillance pathway)	43.7889	61.8612	50.9237	11.4319	12.5735	46	37	55.7777	64	3.24018	7.15955	6.64316	72.6911	87	103.105	12.0246	10	9.35333
Niben101Scf00130g03003	GO:0005634;	K06627	IPR013763;IPR029507;	sp|Q0DJR9|CCA14_ORYSJ	Cyclin-A1-4	-	GO:0005634//nucleus;	-	-	12.7824	25	9.72054	6.13676	20.8785	49.5143	10	8.50348	27.7491	16	4.15704	21.4286	23.198	12.4711	17.6674	29.6375	37	15
Niben101Scf00130g05001	GO:0005524;GO:0016020;GO:0016887;	-	IPR002885;IPR003439;IPR013525;IPR013581;IPR027417;IPR029481;	sp|Q7PC81|AB43G_ARATH	ABC transporter G family member 43	-	GO:0016020//membrane;	GO:0005524//ATP binding;GO:0016887//ATP hydrolysis activity;	-	106.294	187.769	52	53.0022	54.9691	88.3732	189.145	102.887	114.958	84	112	79.0184	139	136.088	154.442	62.6355	58.9957	44
Niben101Scf00130g05009	GO:0005524;GO:0006457;GO:0044267;GO:0051082;	K09499	IPR002423;IPR027409;IPR027410;IPR027413;	sp|P12612|TCPA_YEAST	T-complex protein 1 subunit alpha	GO:0006457//protein folding;GO:0044267//cellular protein metabolic process;	-	GO:0005524//ATP binding;GO:0051082//unfolded protein binding;	-	1053.81	971.752	1107	1188	1486.24	1067	1269.07	983.926	1144.52	1315.81	1529	1770.85	826.924	717	747.227	1371.43	1356.53	1313.62
Niben101Scf00130g05011	-	-	-	-	Unknown protein	-	-	-	-	6.13676	15.1844	6.32097	15	6.37761	8.32474	23	10.3926	7.45344	37.5586	45.7274	33.2563	13.4716	10	16	44.1573	31	33.4819
Niben101Scf00130g07002	-	-	IPR010399;	ref|XP_007013761.1|	TIFY domain protein 8 isoform 3 [Theobroma cacao] gb|EOY31380.1| TIFY domain protein 8 isoform 3 [Theobroma cacao]	-	-	-	-	427.136	465.84	294.946	875.056	1177.48	846.017	468	535	431.115	399	697.719	525.715	47.4511	45.3003	52	455.999	407.912	352
Niben101Scf00130g08007	-	-	IPR006594;IPR015943;	sp|P29829|GBB2_DROME	Guanine nucleotide-binding protein subunit beta-2	-	-	-	-	2337	3042.21	2134	2255.16	2790.18	2204.58	2602.13	2069	2003.63	2119.11	1925	2227.13	1998.45	1830.43	1892.49	4138.33	2994.29	3407
Niben101Scf00130g09002	GO:0004499;GO:0016491;GO:0050660;GO:0050661;GO:0055114;	K11816	IPR013027;IPR016040;IPR020946;	AT1G48910.1	Flavin-containing monooxygenase family protein LENGTH=383	GO:0055114//obsolete oxidation-reduction process;	-	GO:0004499//N,N-dimethylaniline monooxygenase activity;GO:0016491//oxidoreductase activity;GO:0050660//flavin adenine dinucleotide binding;GO:0050661//NADP binding;	ko00380(Tryptophan metabolism)	0	0	0	0	0	0.93168	0	0	0	90.7088	73	24	0	0	1.08006	7.15955	10.4392	6.32097
Niben101Scf00131g00006	-	-	IPR004864;	AT1G65690.1	Late embryogenesis abundant (LEA) hydroxyproline-rich glycoprotein family LENGTH=252	-	-	-	-	62.3556	28.06	28.7394	264	194	178.953	11	60.4833	19.4331	775.351	786.961	912	76.5313	70.2978	109	1654.5	1159.01	1124.55
Niben101Scf00131g00008	-	-	-	AT1G65710.1	unknown protein; INVOLVED IN: N-terminal protein myristoylation; EXPRESSED IN: cultured cell; BEST Arabidopsis thaliana protein match is: unknown protein . LENGTH=455	-	-	-	-	4.32024	1.02279	1.89805	3.16048	7	6.37761	0.924971	8	5.1963	133.23	65.1752	178.753	11.4319	1.79621	3	75	69.7221	83
Niben101Scf00131g01009	-	-	IPR025322;	emb|CDX89594.1|	BnaC04g36130D [Brassica napus]	-	-	-	-	0	1.03926	0	6.62799	11.4319	9.35333	0.898107	0	1	22.0787	36	76.6842	4.09117	2.84707	3.16048	40	56.3356	44.3986
Niben101Scf00131g01010	-	-	IPR001283;	sp|A6MFK9|CRVP_DEMVE	Cysteine-rich venom protein	-	-	-	-	2	0	1.16203	5	1.08006	0	0	0	0	1.06294	5.54982	2	0	0	0	3.11778	5.1963	0.898107
Niben101Scf00131g01018	-	-	IPR006869;IPR025757;	AT5G66600.4	Protein of unknown function, DUF547 LENGTH=629	-	-	-	-	119.045	132	127.552	763.101	465	438.567	154.659	136.978	107.044	987.296	821.768	699	120	104.583	108	732.281	581.969	638.692
Niben101Scf00131g01020	GO:0005515;GO:0005634;GO:0008270;GO:0018024;GO:0034968;GO:0046872;	-	IPR001214;IPR003616;IPR007728;IPR015880;	sp|P55200|KMT2A_MOUSE	Histone-lysine N-methyltransferase 2A	GO:0034968//histone lysine methylation;	GO:0005634//nucleus;	GO:0005515//protein binding;GO:0008270//zinc ion binding;GO:0018024//histone-lysine N-methyltransferase activity;GO:0046872//metal ion binding;	-	727.974	711.893	614.202	399.658	496	695	701.869	729	819.765	280.245	259.083	296.032	450	455.999	479.135	332	298.267	252.485
Niben101Scf00131g01022	-	-	IPR029377;	AT2G23755.1	unknown protein; FUNCTIONS IN: molecular_function unknown; INVOLVED IN: biological_process unknown; LOCATED IN: endomembrane system; Has 35333 Blast hits to 34131 proteins in 2444 species: Archae - 798; Bacteria - 22429; Metazoa - 974; Fungi - 991; Plants - 531; Viruses - 0; Other Eukaryotes - 9610 (source: NCBI BLink). LENGTH=150	-	-	-	-	1	1.08006	0	4.74511	3.16048	3	1.06294	0.924971	1	0	0.93168	0	0	1.03926	0	1	0	3.4861
Niben101Scf00132g00004	GO:0004222;GO:0005524;GO:0006508;	-	IPR000642;IPR003959;IPR027417;	sp|D2NQQ7|FTSH_ROTMD	ATP-dependent zinc metalloprotease FtsH	GO:0006508//proteolysis;	-	GO:0004222//metalloendopeptidase activity;GO:0005524//ATP binding;	-	452.311	586	400.115	305.591	417.563	556.004	424.018	336.79	508	197	214.976	229	430.944	436.732	422.315	200.164	157	175.384
Niben101Scf00132g01002	GO:0003677;GO:0003713;GO:0006355;	-	IPR009044;IPR009057;IPR014876;	sp|Q9VLR5|TCP4_DROME	RNA polymerase II transcriptional coactivator	GO:0006355//regulation of transcription, DNA-templated;	-	GO:0003677//DNA binding;GO:0003713//transcription coactivator activity;	-	434.684	549	307	214.976	392	638.315	514.465	469.766	625.776	150	241.286	289.516	516	639.144	747.207	178.956	161.085	145.496
Niben101Scf00132g01003	GO:0009055;GO:0015035;GO:0045454;	K17479	IPR012336;	AT1G64500.1	Glutaredoxin family protein LENGTH=368	GO:0045454//cell redox homeostasis;	-	GO:0009055//electron transfer activity;GO:0015035//protein-disulfide reductase activity;	-	135.71	58.9957	48	25.5104	34.2239	51	96.6511	45.6523	59.6519	15.5889	36.3741	27.8413	1355	1756	1834.85	307	314.297	236.265
Niben101Scf00132g01013	-	-	-	-	Unknown protein	-	-	-	-	0	0	0	0	0	0	0	0	0	1.08006	0	0	1.05349	0	0	0	0	0
Niben101Scf00132g01018	-	-	-	-	Unknown protein	-	-	-	-	0	0	0	0	0.949023	0	0	0	0	0	0	0	0	0	1.03926	0	0	0
Niben101Scf00132g01019	-	-	IPR001810;	AT4G10925.1	Nuclear transport factor 2 (NTF2) family protein LENGTH=231	-	-	-	-	83.9719	81.3974	94	81.0622	73.6027	101.629	89.3763	99.7689	71.8485	77	88	95.2868	75	59.4033	70.5727	73.0747	80.0656	70
Niben101Scf00132g02003	GO:0003677;GO:0005634;GO:0006355;GO:0009725;GO:0046983;	K14486	IPR003311;IPR010525;IPR015300;	sp|Q9XED8|ARFI_ARATH	Auxin response factor 9	GO:0006355//regulation of transcription, DNA-templated;GO:0009725//response to hormone;	GO:0005634//nucleus;	GO:0003677//DNA binding;GO:0046983//protein dimerization activity;	ko04075(Plant hormone signal transduction)	84.18	73.6448	41	130	191.736	222	106.926	105.348	144.251	61.1027	68	58.4614	126.721	149	168.36	18.6336	26.512	22.8637
Niben101Scf00132g02004	-	-	IPR013989;	AT5G42050.1	DCD (Development and Cell Death) domain protein LENGTH=349	-	-	-	-	7406.04	7322.66	9241.26	4973	8116.57	5519.3	10145	8271.46	5136.35	4493.78	4723.43	4620.55	2485.96	4057	5695	8958.12	6941	5832.32
Niben101Scf00132g03003	-	-	-	ref|XP_003602276.1|	Protein ABIL2 [Medicago truncatula] gb|AES72527.1| ABIL1-like protein [Medicago truncatula]	-	-	-	-	1.03926	0.93168	3.314	5.1963	3.11778	0	0	2	8.13424	15	1.08006	2.04559	18.0314	16.8559	19	9.56642	3.69988	4
Niben101Scf00132g03011	GO:0016020;GO:0016760;GO:0030244;	-	IPR005150;IPR029044;	sp|Q0WVN5|CSLG3_ARATH	Cellulose synthase-like protein G3	GO:0030244//cellulose biosynthetic process;	GO:0016020//membrane;	GO:0016760//cellulose synthase (UDP-forming) activity;	-	0	0	0	0	1.02279	0	0	0	0	0	0	0	0	0	1.03926	0	0	0
Niben101Scf00132g03012	GO:0005838;GO:0006508;	K03031	IPR005062;	sp|Q9SGW3|PSD8A_ARATH	26S proteasome non-ATPase regulatory subunit 8 homolog A	GO:0006508//proteolysis;	GO:0005838//proteasome regulatory particle;	-	ko03050(Proteasome)	286	259.356	267.317	357	341.916	288.821	312.62	235.912	290.993	564.909	879	707	269.592	182	228.973	844.827	708.92	810.137
Niben101Scf00132g03015	GO:0003735;GO:0005840;GO:0006412;GO:0019843;	K02990	IPR000529;IPR014717;	sp|B7KD42|RS6_CYAP7	30S ribosomal protein S6	GO:0006412//translation;	GO:0005840//ribosome;	GO:0003735//structural constituent of ribosome;GO:0019843//rRNA binding;	ko03010(Ribosome)	206.813	367.898	154.474	203	224	409.036	173	273.255	303.769	80.6669	68.4772	85	324.195	324.665	409	121.593	81.0561	122.618
Niben101Scf00132g03016	-	-	IPR018838;	gb|KEH21267.1|	DUF2439 family protein [Medicago truncatula]	-	-	-	-	6.48036	22.5014	25.6236	48.4608	28	19.1328	21.2743	19	15.5889	14.9069	35.3493	41.5704	15.5889	9.87918	9	31	31.3749	22
Niben101Scf00132g03021	-	K19039	-	sp|Q84TF5|RHA4A_ARATH	RING-H2 zinc finger protein RHA4a	-	-	-	-	0	0	0	0	0	0	0	0	2	0	0	0	0	0	0	0	0	0
Niben101Scf00132g04010	-	-	IPR012458;	AT1G04960.2	Protein of unknown function (DUF1664) LENGTH=334	-	-	-	-	761	675	705.355	790	1034.7	922.559	824.701	1074.56	904	1204.31	1168.24	1506	1041.34	727.642	1079.26	1415.47	1147.34	1051.68
Niben101Scf00132g04012	GO:0006614;GO:0008312;GO:0048500;	K03105	IPR002778;	sp|Q943Z6|SRP19_ARATH	Signal recognition particle 19 kDa protein	GO:0006614//SRP-dependent cotranslational protein targeting to membrane;	GO:0048500//signal recognition particle;	GO:0008312//7S RNA binding;	ko03060(Protein export)	20.0164	14	55.2726	28.6741	98	29.0993	134.162	23.198	23.903	25.9815	11.6754	19	24	16.2685	42	21.6012	26.5926	11.3883
Niben101Scf00133g01004	GO:0006826;GO:0006879;GO:0008199;	K00522	IPR001519;IPR008331;IPR009078;	gb|ABD66596.1|	iron-binding protein [Pyrus pyrifolia]	GO:0006826//iron ion transport;GO:0006879//cellular iron ion homeostasis;	-	GO:0008199//ferric iron binding;	-	957.745	523.787	866.742	532.577	908	960	2342.66	1224	831.646	3370.1	4424.34	5617.23	957	1125.65	1158.06	4338	4282.79	3904.67
Niben101Scf00133g02003	GO:0003993;GO:0016791;	K03103	IPR029033;	sp|Q54ND5|MINP1_DICDI	Multiple inositol polyphosphate phosphatase 1	-	-	GO:0003993//acid phosphatase activity;GO:0016791//phosphatase activity;	ko00562(Inositol phosphate metabolism);ko00010(Glycolysis / Gluconeogenesis)	180	168.489	180.011	190.754	181.201	209	269.986	179.444	153	124.711	126.708	160.176	150.693	172.517	141.901	188	159	156.875
Niben101Scf00133g02013	-	-	IPR007527;	gb|ABF97068.1|	transposon protein, putative, Mutator sub-class [Oryza sativa Japonica Group]	-	-	-	-	1.84994	1	1.03926	0	0	2.07852	1.03926	0	1	4	4.64814	23	0	0	0.949023	4.21398	23	15.944
Niben101Scf00133g04002	-	K03237	IPR024055;	AT5G05470.1	eukaryotic translation initiation factor 2 alpha subunit LENGTH=344	-	-	-	ko04141(Protein processing in endoplasmic reticulum)	2.69432	10	8	4.64814	1	9.72054	8.18234	2.84707	6.32097	3	2.12587	0	6	7.27481	2.79504	0	0	3.11778
Niben101Scf00133g04003	-	-	IPR004159;IPR029063;	AT3G56080.1	S-adenosyl-L-methionine-dependent methyltransferases superfamily protein LENGTH=610	-	-	-	-	16.1334	4.21398	3	7.44055	19.4244	36	2.07852	3.72672	3.314	7.27481	6.23556	4.49053	3	2	4.64814	1	3.24018	4.09117
Niben101Scf00133g04021	GO:0003676;GO:0003723;GO:0003743;GO:0005850;	K03237	IPR011488;IPR012340;IPR024054;IPR024055;	AT5G05470.1	eukaryotic translation initiation factor 2 alpha subunit LENGTH=344	-	GO:0005850//eukaryotic translation initiation factor 2 complex;	GO:0003676//nucleic acid binding;GO:0003723//RNA binding;GO:0003743//translation initiation factor activity;	ko04141(Protein processing in endoplasmic reticulum)	26.087	35.3493	30.1385	29.0993	27.8413	42	43	40.6712	49	7.56042	10.2279	9.49023	26.3374	30	29.7622	10.1747	7	8.31407
Niben101Scf00133g04024	-	-	IPR021102;	sp|P81898|PNAA_PRUDU	Peptide-N4-(N-acetyl-beta-glucosaminyl)asparagine amidase A	-	-	-	-	465.976	259	277.575	151.373	227.765	430.879	183	269.986	295.991	162	195.381	196.584	243.026	218.244	230.716	235.304	248	205
Niben101Scf00133g05001	-	K15502	-	AT5G05480.1	Peptide-N4-(N-acetyl-beta-glucosaminyl)asparagine amidase A protein LENGTH=608	-	-	-	-	0	1.84994	2	0	1.86336	1.10467	0	0	0	180	235	218.463	0	5.4003	3.06838	163.232	153.81	157
Niben101Scf00133g06001	GO:0004672;GO:0005524;GO:0006468;GO:0016772;	-	IPR011009;IPR013210;IPR013320;IPR025875;	sp|P47735|RLK5_ARATH	Receptor-like protein kinase 5	GO:0006468//protein phosphorylation;	-	GO:0004672//protein kinase activity;GO:0005524//ATP binding;GO:0016772//transferase activity, transferring phosphorus-containing groups;	-	3499.19	3040.99	2436	412	786.697	1029	3725.13	2709.38	1895.2	168.559	242	124.363	1692.7	2007	2173.09	428.573	456.227	262.933
Niben101Scf00133g06002	-	-	IPR015661;	sp|O43683|BUB1_HUMAN	Mitotic checkpoint serine/threonine-protein kinase BUB1	-	-	-	-	56.2536	64.5335	66.3702	36	72.2796	75.8476	52	58.1985	83.8512	38.6633	84.18	128.868	51.1921	44	56	66.236	58	57.2432
Niben101Scf00133g08004	GO:0003677;GO:0003682;	-	IPR009057;	ref|XP_002528326.1|	DNA binding protein, putative [Ricinus communis] gb|EEF34084.1| DNA binding protein, putative [Ricinus communis]	-	-	GO:0003677//DNA binding;GO:0003682//chromatin binding;	-	20.7852	61.4909	20.9886	8.31407	23.903	24.2489	42	31	25.5648	12	7.56042	4.09117	18.9805	23.1769	31	6.37761	5.54982	9
Niben101Scf00133g09001	GO:0008152;GO:0070569;	-	IPR002618;IPR029044;	sp|Q0GZS3|USP_CUCME	UDP-sugar pyrophosphorylase	GO:0008152//metabolic process;	-	GO:0070569//uridylyltransferase activity;	-	711	554.291	295	267.855	373.319	468.817	476.18	471	604.81	363.514	533	547.69	406.212	500.413	550.807	625.634	480.487	513
Niben101Scf00135g00010	GO:0006621;GO:0016021;GO:0046923;	-	IPR000133;	AT4G38790.1	ER lumen protein retaining receptor family protein LENGTH=273	GO:0006621//protein retention in ER lumen;	GO:0016021//integral component of membrane;	GO:0046923//ER retention sequence binding;	-	85	78.6572	77.6975	80	85.2193	121.118	163.49	91.4548	69.6304	88.0145	75	96	156.875	64	200.891	126.826	55.0433	93.761
Niben101Scf00135g00011	GO:0003824;GO:0008152;GO:0009058;GO:0016746;GO:0016747;	-	IPR011141;IPR016039;	sp|P53415|CHS2_SECCE	Chalcone synthase 2	GO:0008152//metabolic process;GO:0009058//biosynthetic process;	-	GO:0003824//catalytic activity;GO:0016746//acyltransferase activity;GO:0016747//acyltransferase activity, transferring groups other than amino-acyl groups;	-	0	0	0.898107	2	1	2.32407	1	3.24018	1.02279	0.949023	0	2	2.12587	2.77491	2	0	0.93168	2.20933
Niben101Scf00135g00017	-	-	-	emb|CDX86876.1|	BnaA09g22660D [Brassica napus]	-	-	-	-	400.702	325.248	278.064	378.205	397	444.307	466.185	492	560.161	480.747	658.38	803.347	430.253	423.906	571	531	554.291	464
Niben101Scf00135g00025	GO:0003824;GO:0009116;	K01244	IPR018017;	sp|Q9T0I8|MTN1_ARATH	5'-methylthioadenosine/S-adenosylhomocysteine nucleosidase 1	GO:0009116//nucleoside metabolic process;	-	GO:0003824//catalytic activity;	ko00270(Cysteine and methionine metabolism)	1004	784.641	900.003	456.227	392.84	752.424	1148.68	1440	1427	212.652	187	246.254	1431.91	1295.42	1822.55	235	271.048	190.544
Niben101Scf00135g00026	GO:0010215;GO:0016049;GO:0031225;	-	IPR006918;	sp|Q6Z4G8|COBL1_ORYSJ	COBRA-like protein 1	GO:0010215//cellulose microfibril organization;GO:0016049//cell growth;	GO:0031225//anchored component of membrane;	-	-	1	0	0	43	24.8414	11.2507	0	0	0	70.1537	49.0235	76	1.03926	0.93168	2.20933	84.18	56.12	64.6637
Niben101Scf00135g00027	-	-	IPR011992;	AT4G38810.2	Calcium-binding EF-hand family protein LENGTH=375	-	-	-	-	471.966	329	348.643	805.65	535	740.992	657.766	556.751	412.586	844.918	1056.17	1276	678	749.512	883	939.652	866.305	744.983
Niben101Scf00135g01008	-	-	IPR002885;IPR011990;	sp|Q9LVQ5|PP432_ARATH	Pentatricopeptide repeat-containing protein	-	-	-	-	653.962	706.696	233.833	88.0145	247	643	299.805	385	537.87	1659.99	1232.78	1362.17	814	965.145	926.821	886	869.86	795.654
Niben101Scf00135g02006	-	K14488	IPR003676;	AT4G38840.1	SAUR-like auxin-responsive protein family LENGTH=99	-	-	-	ko04075(Plant hormone signal transduction)	0	2.16012	3.06838	0.949023	1.05349	0	1.06294	3.69988	4	0	0	0	6.23556	5.1963	4.49053	0	0	0
Niben101Scf00135g03003	-	K14488	IPR003676;	AT4G38840.1	SAUR-like auxin-responsive protein family LENGTH=99	-	-	-	ko04075(Plant hormone signal transduction)	0	4	0	7.45344	7.73266	1.03926	0	0.898107	3	6	1.16203	6	0	0	0	6.32097	7	3.18881
Niben101Scf00135g03006	-	K14488	IPR003676;	AT4G38840.1	SAUR-like auxin-responsive protein family LENGTH=99	-	-	-	ko04075(Plant hormone signal transduction)	15.2678	11	11	6.97221	4	15.1208	22.5014	11.3883	18.9629	2	2.12587	2.77491	22	18.7067	40.9939	1.10467	1.03926	3.11778
Niben101Scf00135g03007	-	K14488	IPR003676;	AT4G38840.1	SAUR-like auxin-responsive protein family LENGTH=99	-	-	-	ko04075(Plant hormone signal transduction)	0.949023	3.16048	0	0	0	2	0	1.86336	1.10467	0	0	0	7	4	15.1065	3	0	0
Niben101Scf00135g03010	-	K14488	IPR003676;	AT5G18020.1	SAUR-like auxin-responsive protein family LENGTH=91	-	-	-	ko04075(Plant hormone signal transduction)	0	0	0	0	0.898107	1	0	0	0	0	0	0	1.05349	5	1.06294	0	0	0
Niben101Scf00135g03019	-	K14488	IPR003676;	AT2G21210.1	SAUR-like auxin-responsive protein family LENGTH=98	-	-	-	ko04075(Plant hormone signal transduction)	0	0	0	0	0	0	0	0	0.924971	0	0	0	0	1.03926	0	0	0	0
Niben101Scf00135g03020	-	-	-	ref|XP_003629676.1|	UV radiation resistance-associated gene protein [Medicago truncatula] gb|AET04152.1| UV radiation resistance-associated-like protein [Medicago truncatula]	-	-	-	-	51.0209	38.8488	39	44.6881	35.4038	68.4892	66.5126	54.0415	47.5997	24	32	44.1573	21	48.6027	46.0257	33.2158	29.4979	24
Niben101Scf00135g03022	-	K14488	IPR003676;	AT1G75580.1	SAUR-like auxin-responsive protein family LENGTH=108	-	-	-	ko04075(Plant hormone signal transduction)	0	0	0	1	0	0	0	0	1.89805	0	0	0	1.84994	0	0	0	0	0
Niben101Scf00135g03035	-	K14488	-	-	Unknown protein	-	-	-	ko04075(Plant hormone signal transduction)	5.11396	6.64316	5.26747	93	36.1398	37.9238	7	4.15704	13.0435	43.0819	24.9422	53.0022	5.38864	9	11	18.5926	9	15.1208
Niben101Scf00135g04008	-	K02834	IPR000238;IPR015946;	AT4G34730.1	ribosome-binding factor A family protein LENGTH=215	-	-	-	-	90.4156	105.28	51.9193	46.7667	74.8267	119.448	83	129	180.115	16	28.0816	19.4331	119.577	126.419	132	25.5104	21.2743	24
Niben101Scf00135g04010	-	K14488	IPR003676;	AT4G34760.1	SAUR-like auxin-responsive protein family LENGTH=107	-	-	-	ko04075(Plant hormone signal transduction)	0	0	0	0	0	0.949023	0	0	0	0.924971	0	0	0	0	0	0	0	0
Niben101Scf00135g04013	-	K14488	IPR003676;	AT1G75590.1	SAUR-like auxin-responsive protein family LENGTH=154	-	-	-	ko04075(Plant hormone signal transduction)	2	1.06294	2.77491	9	8.31407	9.3168	1.10467	0	7.27481	0.898107	1	2	17.4305	24	31.3217	1.02279	0	0
Niben101Scf00136g01010	GO:0003677;GO:0006355;	-	IPR003441;	sp|Q9FLJ2|NC100_ARATH	NAC domain-containing protein 100	GO:0006355//regulation of transcription, DNA-templated;	-	GO:0003677//DNA binding;	-	63.3948	34.2956	39.5167	34	52	47.6434	45	66.9637	70.5727	33.2158	64.2632	38	22.3216	32.374	29	615.241	491.927	413.145
Niben101Scf00136g03004	GO:0006810;GO:0016021;	K20352	IPR015720;	sp|Q28735|TMEDA_RABIT	Transmembrane emp24 domain-containing protein 10	GO:0006810//transport;	GO:0016021//integral component of membrane;	-	-	0	1.02279	0	0	0	0	0	0	0	0	0	0	0	0	0	0	0	0
Niben101Scf00136g03005	GO:0003824;GO:0030170;	K01739	IPR000277;IPR015424;	sp|Q1M0P5|METB_HELPX	Cystathionine gamma-synthase	-	-	GO:0003824//catalytic activity;GO:0030170//pyridoxal phosphate binding;	ko00920(Sulfur metabolism);ko00450(Selenocompound metabolism);ko00270(Cysteine and methionine metabolism)	1785	2468.24	2020.81	2594.86	2558.66	2537.87	2101.57	2616	2702	1560.61	1802	1579.05	1382.82	1065.75	1322.14	2214	1832.5	1656.62
Niben101Scf00138g00001	-	-	IPR014729;	AT5G35380.1	Protein kinase protein with adenine nucleotide alpha hydrolases-like domain LENGTH=731	-	-	-	-	2	2	11.6203	19	16.2009	9.20513	0.949023	0	0	436.866	328.365	846	12.4711	3.72672	9.94199	348.152	305.542	330.503
Niben101Scf00138g01001	-	K13462	-	sp|F4IXW2|BIG5_ARATH	Brefeldin A-inhibited guanine nucleotide-exchange protein 5	-	-	-	-	227.555	185	243.412	186.844	187	278.521	173.292	270.643	231.755	176.674	234.406	159	97	132.472	151	177.13	157.51	116.73
Niben101Scf00138g01002	-	K13462	-	sp|F4IXW2|BIG5_ARATH	Brefeldin A-inhibited guanine nucleotide-exchange protein 5	-	-	-	-	88.3732	113.279	90.4156	102.384	100	100	106.907	111	139.328	70.5727	94.9023	67.4237	98	86.0977	69.3728	96	65.4733	63.3542
Niben101Scf00138g01020	GO:0005086;GO:0005488;GO:0032012;	K13462	IPR000904;IPR016024;IPR023394;	sp|F4IXW2|BIG5_ARATH	Brefeldin A-inhibited guanine nucleotide-exchange protein 5	GO:0032012//regulation of ARF protein signal transduction;	-	GO:0005488//binding;	-	694	729.04	586.06	574.159	642.632	568	550.6	671.529	782	437.528	547.828	492.681	522.747	571.593	507.43	491	470	522.916
Niben101Scf00138g03003	GO:0003676;GO:0004386;GO:0005524;GO:0006810;GO:0008026;	K12813	IPR001482;IPR001650;IPR007502;IPR011709;IPR014001;IPR027417;	AT3G26560.1	ATP-dependent RNA helicase, putative LENGTH=1168	GO:0006810//transport;	-	GO:0003676//nucleic acid binding;GO:0004386//helicase activity;GO:0005524//ATP binding;	ko03040(Spliceosome)	74.9226	163	107.044	605.592	1020.71	384.526	77.9444	103.282	37	2768	3333.88	3262	235.453	262.858	149.946	4314.06	3627	3451.35
Niben101Scf00138g04001	GO:0003677;GO:0006355;	-	IPR003441;	sp|Q5Z6B6|NAC76_ORYSJ	NAC domain-containing protein 76	GO:0006355//regulation of transcription, DNA-templated;	-	GO:0003677//DNA binding;	-	0	0	0	0	0	0	1.02279	0	0	0	0	0	0	0	0	2.20933	0	1.03926
Niben101Scf00138g05004	GO:0004672;GO:0004674;GO:0005524;GO:0006468;GO:0016772;	-	IPR011009;IPR011993;	AT5G47750.1	D6 protein kinase like 2 LENGTH=586	GO:0006468//protein phosphorylation;	-	GO:0004672//protein kinase activity;GO:0004674//protein serine/threonine kinase activity;GO:0005524//ATP binding;GO:0016772//transferase activity, transferring phosphorus-containing groups;	-	0.949023	0	0	0	0	0	0	0.93168	1.10467	14.5496	10.3926	165.252	1	0	0	112	213.852	158.533
Niben101Scf00138g05016	-	-	IPR012946;	sp|Q94CD8|E134_ARATH	Glucan endo-1,3-beta-glucosidase 4	-	-	-	-	0	0	0	0	0	0	2	0	1	0	1.02279	0	1.05349	1	0	0	0	0
Niben101Scf00138g05021	GO:0003677;GO:0003682;	-	IPR009057;IPR025756;	sp|Q9SAK5|APL_ARATH	Myb family transcription factor APL	-	-	GO:0003677//DNA binding;GO:0003682//chromatin binding;	-	262.62	143	155.529	94.0969	140.455	204.378	197	189.202	132.271	89	103.926	109.007	198.84	171.478	163.164	65.5618	49	55
Niben101Scf00138g05022	-	-	-	-	Unknown protein	-	-	-	-	0	0.924971	0	1.03926	2.79504	1.10467	0	3.11778	0	0	0	0	1	0	0	0	0	0
Niben101Scf00139g00004	GO:0000166;GO:0003676;	K12900	IPR012677;	sp|Q5RC80|RBM39_PONAB	RNA-binding protein 39	-	-	GO:0000166//nucleotide binding;GO:0003676//nucleic acid binding;	ko03040(Spliceosome)	129.907	131.124	171	180	182.439	142	138.248	97.1653	74.9728	83.2261	53	104.168	88.7972	88	134.064	59.6275	64.0706	45.7274
Niben101Scf00140g00002	-	-	-	emb|CDY63903.1|	BnaA01g34680D [Brassica napus]	-	-	-	-	159.556	129.067	96.9215	74	120.112	113.771	123	121.593	130.435	766.638	1132.79	1027.83	90.7088	164	186	632.147	478	484.947
Niben101Scf00140g01004	-	-	IPR025131;	gb|KEH34910.1|	plant/F14D7-9 protein [Medicago truncatula]	-	-	-	-	10.3926	5.59008	4.41866	3.11778	9.35333	8.08296	5	10	8.13424	2	5.4003	6.13676	13.2863	12.6419	2	12.7552	3.69988	5
Niben101Scf00140g01005	-	-	IPR025131;	AT4G39860.1	unknown protein; BEST Arabidopsis thaliana protein match is: unknown protein . LENGTH=299	-	-	-	-	147	131.31	79	45.3625	72.6183	125.271	132.74	126	188.14	74.9226	150	148.614	78.2611	106.048	113.279	131.986	135.614	151
Niben101Scf00140g02007	-	-	IPR013210;	sp|Q94AG2|SERK1_ARATH	Somatic embryogenesis receptor kinase 1	-	-	-	-	745	669.649	643.78	1212	1372.86	1154.35	915.767	928.058	745.149	554.132	613	969	870.364	621	869.448	1050.41	874.999	978.697
Niben101Scf00140g02010	GO:0000166;GO:0003735;GO:0005622;GO:0005840;GO:0006412;	K02892	IPR013025;	sp|B7GW04|RL23_ACIB3	50S ribosomal protein L23	GO:0006412//translation;	GO:0005622//intracellular anatomical structure;GO:0005840//ribosome;	GO:0000166//nucleotide binding;GO:0003735//structural constituent of ribosome;	ko03010(Ribosome)	166.281	123.672	108.671	136	166	180.115	131	143.648	98.1881	324.566	477.233	353	90.3495	86.0223	151	419.861	275.777	400.993
Niben101Scf00140g02014	-	-	-	emb|CDY56499.1|	BnaAnng14340D [Brassica napus]	-	-	-	-	17.281	19.4331	20.8785	25.2839	43	88.2236	36.9988	10	39.4919	34.4722	74.0126	38.4526	21.8244	15.2678	25	32	36.0231	35
Niben101Scf00141g00002	-	K13993	IPR008978;	sp|P02519|HSP11_SOYBN	17.3 kDa class I heat shock protein	-	-	-	ko04141(Protein processing in endoplasmic reticulum)	1	0	0	0	0	0	0.898107	1	0	1.16203	1	0	0	0.949023	0	0	0	0
Niben101Scf00141g01002	GO:0005375;GO:0016021;GO:0035434;	K14686	IPR007274;	sp|Q39065|COPT1_ARATH	Copper transporter 1	GO:0035434//copper ion transmembrane transport;	GO:0016021//integral component of membrane;	GO:0005375//copper ion transmembrane transporter activity;	-	46	119	188.25	141	176.05	120.69	255.287	410.863	138	115.86	93.422	112	141.339	72.671	162.386	255.658	261.893	156.271
Niben101Scf00141g01007	-	K13993	IPR008978;	sp|P27880|HSP12_MEDSA	18.2 kDa class I heat shock protein	-	-	-	ko04141(Protein processing in endoplasmic reticulum)	13751.3	7230	8042.17	2099.68	5137	9950.91	12618.7	16260.7	12078.3	1305.31	1214.24	2247	8497	10453.7	10981	3428.11	2076.27	2216.92
Niben101Scf00141g02002	-	-	-	ref|XP_002530394.1|	conserved hypothetical protein [Ricinus communis] gb|EEF31964.1| conserved hypothetical protein [Ricinus communis]	-	-	-	-	74.0126	106.004	49.8844	134.716	81	96	73.2082	64	77.7643	31.7066	54.0943	45.3003	69	64.839	91.5721	58	53.0022	68.0126
Niben101Scf00141g02008	GO:0003700;GO:0006355;GO:0043565;	-	IPR004827;	emb|CBM56257.1|	bZIP transcription factor [Nicotiana benthamiana]	GO:0006355//regulation of transcription, DNA-templated;	-	GO:0003700//DNA-binding transcription factor activity;GO:0043565//sequence-specific DNA binding;	-	0	0	1.02279	0	0	0	0	0	0	0	0	0	0	0	0	0	0	1.16203
Niben101Scf00142g01014	-	-	IPR014476;	AT4G17800.1	Predicted AT-hook DNA-binding family protein LENGTH=292	-	-	-	-	1.84994	6	5.1963	6.52176	9.94199	10.3926	10.3926	0.898107	2	2	2.32407	5	9.72054	3.06838	3.79609	2.10699	0	3.18881
Niben101Scf00143g00007	GO:0005216;GO:0005247;GO:0006821;GO:0016020;GO:0055085;	K05016	IPR001807;	AT5G49890.1	chloride channel C LENGTH=779	GO:0006821//chloride transport;GO:0055085//transmembrane transport;	GO:0016020//membrane;	GO:0005216//ion channel activity;GO:0005247//voltage-gated chloride channel activity;	-	290.987	198	188	123.176	124	219.252	277.177	263.828	302.353	56	54.2097	36.9988	250	275.404	245.032	90.5825	104.965	90.4156
Niben101Scf00143g01004	GO:0005506;GO:0009055;GO:0020037;	K08738	IPR002327;IPR009056;	sp|P00059|CYC_ABUTH	Cytochrome c	-	-	GO:0005506//iron ion binding;GO:0009055//electron transfer activity;GO:0020037//heme binding;	ko00190(Oxidative phosphorylation)	0	0	1	3.18881	0	1	0	0.93168	1.10467	13.5104	11.4319	12.5735	0	1	0	17	12.9607	19.4331
Niben101Scf00143g01007	-	-	IPR007877;	gb|AES63134.2|	lysine ketoglutarate reductase trans-splicing-like protein [Medicago truncatula]	-	-	-	-	2.79504	1.10467	0	1.03926	1.79621	0	0	0	0	1.08006	3.06838	2.84707	0	0	0	2.77491	2	3.11778
Niben101Scf00143g01010	-	-	IPR007877;	gb|KEH42946.1|	lysine ketoglutarate reductase trans-splicing-like protein [Medicago truncatula]	-	-	-	-	3.4861	1	4.32024	1.02279	0.949023	5.26747	3	3.18881	0.924971	6	1.03926	1.86336	1.10467	0	1.03926	0	4	4
Niben101Scf00143g02012	GO:0003924;GO:0005525;GO:0005622;GO:0006184;GO:0006886;GO:0006913;GO:0007165;GO:0007264;GO:0015031;GO:0016020;	K07874	IPR001806;IPR002041;IPR005225;IPR024156;IPR027417;	sp|P22128|RAB8_DIPOM	Ras-related protein Rab-8	GO:0006184//obsolete GTP catabolic process;GO:0006886//intracellular protein transport;GO:0006913//nucleocytoplasmic transport;GO:0007165//signal transduction;GO:0007264//small GTPase mediated signal transduction;GO:0015031//protein transport;	GO:0005622//intracellular anatomical structure;GO:0016020//membrane;	GO:0003924//GTPase activity;GO:0005525//GTP binding;	-	234.909	293.216	197	307.621	461.181	359.016	190.184	354.387	343.975	273	357	260.296	277	70.2039	140.123	178.416	280.23	131
Niben101Scf00143g02013	GO:0003924;GO:0005525;GO:0005622;GO:0006184;GO:0006886;GO:0006913;GO:0007165;GO:0007264;GO:0015031;GO:0016020;	K07904	IPR001806;IPR002041;IPR005225;IPR027417;	sp|E2RQ15|RAB25_CANFA	Ras-related protein Rab-25	GO:0006184//obsolete GTP catabolic process;GO:0006886//intracellular protein transport;GO:0006913//nucleocytoplasmic transport;GO:0007165//signal transduction;GO:0007264//small GTPase mediated signal transduction;GO:0015031//protein transport;	GO:0005622//intracellular anatomical structure;GO:0016020//membrane;	GO:0003924//GTPase activity;GO:0005525//GTP binding;	ko04144(Endocytosis)	71.7089	45.8034	40	145	206.842	158	43.2024	46.0257	49.3492	299.192	347	223.216	50.8734	46	68.5911	110.87	138.083	103.926
Niben101Scf00143g02022	GO:0005515;GO:0016491;GO:0016702;GO:0046872;GO:0055114;	K15718	IPR000907;IPR008976;	sp|P38416|LOXB_SOLLC	Linoleate 9S-lipoxygenase B	GO:0055114//obsolete oxidation-reduction process;	-	GO:0005515//protein binding;GO:0016491//oxidoreductase activity;GO:0016702//oxidoreductase activity, acting on single donors with incorporation of molecular oxygen, incorporation of two atoms of oxygen;GO:0046872//metal ion binding;	ko00591(Linoleic acid metabolism)	0	0	1.05349	1	0	0.924971	0	1.03926	0.93168	4.41866	2.07852	1.03926	0	0	2	3.4861	2	1.08006
Niben101Scf00143g02023	GO:0016702;GO:0046872;GO:0055114;	K15718	IPR000907;IPR027433;	AT1G55020.1	lipoxygenase 1 LENGTH=859	GO:0055114//obsolete oxidation-reduction process;	-	GO:0016702//oxidoreductase activity, acting on single donors with incorporation of molecular oxygen, incorporation of two atoms of oxygen;GO:0046872//metal ion binding;	ko00591(Linoleic acid metabolism)	4.15704	1.86336	1.10467	3.11778	0	2.69432	9	3	2.32407	9	18.361	8.18234	0	2.10699	1	5.31468	1.84994	6
Niben101Scf00143g03005	-	-	IPR000270;	AT1G79570.1	Protein kinase superfamily protein with octicosapeptide/Phox/Bem1p domain LENGTH=1248	-	-	-	-	5	2.32407	8	45.3625	41.9345	36.0629	1.05349	3	3.18881	92.4971	212	65.4733	7.45344	7.73266	13.5104	74.8267	72.7467	107
Niben101Scf00143g03009	-	K14328	IPR005120;	sp|Q9FVW4|RENT3_ARATH	Regulator of nonsense transcripts UPF3	-	-	-	ko03015(mRNA surveillance pathway);ko03013(Nucleocytoplasmic transport)	554	609.062	484.685	568	669.283	649.381	1086.99	730.599	786.719	615.203	889	596	551.966	476	696.639	795.733	697.532	795.389
Niben101Scf00144g00007	-	-	IPR007262;	sp|Q9AST6|VSP55_ARATH	Vacuolar protein sorting-associated protein 55 homolog	-	-	-	-	430.253	396.997	366.428	513	425	540.346	646	556.231	327.294	185.059	200.164	127	228.531	200.719	264	267.09	248.758	246.34
Niben101Scf00144g00011	-	-	IPR016040;	gb|EWM14902.1|	short-chain dehydrogenase [Kutzneria sp. 744]	-	-	-	-	23.7613	40.9117	18.0314	31.6048	14	32.951	27.7491	26	32.217	122.05	294.946	72.7481	14.5496	16.1659	15	95	133.634	94
Niben101Scf00144g01015	-	-	IPR011990;IPR029489;	sp|Q3M690|YCF3_ANAVT	Photosystem I assembly protein Ycf3	-	-	-	-	664	719.167	534.784	722.451	868.821	782.562	784.945	796	678	995.864	1038	820.845	653.564	586.496	692.146	820	798.264	639.155
Niben101Scf00144g01016	-	-	IPR025846;IPR026057;	sp|Q9CAX1|TBL8_ARATH	Protein trichome birefringence-like 8	-	-	-	-	8	2	2.32407	3	3.24018	4.09117	4.74511	4.21398	2	4.25174	5.54982	15	9.35333	1.86336	6.62799	3.11778	7.27481	2.69432
Niben101Scf00144g02007	-	K12611	IPR010334;IPR011993;	sp|Q9SJF3|DCP1_ARATH	mRNA-decapping enzyme-like protein	-	-	-	ko03018(RNA degradation)	369.777	293	249.79	98.9719	196	227.598	398.759	356.807	388.683	32.217	54.7845	35	259	317.235	289	145.808	128.872	75.9218
Niben101Scf00144g02015	-	-	IPR000477;IPR024937;	AT5G04050.2	RNA-directed DNA polymerase (reverse transcriptase) LENGTH=695	-	-	-	-	83.9545	69.6304	87.2978	66.4599	81	88	104.583	80	89.645	164.67	147.098	193.843	91	92.4754	76.7726	142	156.928	101.553
Niben101Scf00144g02016	-	-	IPR011685;	AT3G11560.2	LETM1-like protein LENGTH=872	-	-	-	-	1052	1027.14	590.151	293.248	536.229	792	715.355	812.124	1012	390.761	339.131	500.413	1523.55	1570.32	1375	390	312	360.231
Niben101Scf00144g03005	GO:0000413;GO:0003755;GO:0006457;	K12733	IPR002130;IPR024936;IPR029000;	sp|O74942|CYP9_SCHPO	Peptidyl-prolyl cis-trans isomerase 9	GO:0000413//protein peptidyl-prolyl isomerization;GO:0006457//protein folding;	-	GO:0003755//peptidyl-prolyl cis-trans isomerase activity;	ko03040(Spliceosome)	223.843	225	246.304	312.113	398.784	442.724	414.664	303.56	272	197	447.383	206	216.012	219.9	204.04	253.892	249	189.202
Niben101Scf00144g03009	GO:0003677;GO:0003899;GO:0006351;	K10908	IPR002092;	sp|Q8L6J4|RPO1A_TOBAC	DNA-directed RNA polymerase 1A	GO:0006351//transcription, DNA-templated;	-	GO:0003677//DNA binding;GO:0003899//DNA-directed 5'-3' RNA polymerase activity;	-	137.41	70	105	166.171	130	128.527	303.769	118.628	141.168	177	481.51	221.993	78	101.847	105.28	291.632	250.461	193.302
Niben101Scf00144g04001	-	-	IPR015300;	sp|A2X1A1|ARFF_ORYSI	Auxin response factor 6	-	-	-	-	189.805	281.283	172	909.872	683.553	607	298.267	182.609	199.944	64.4341	66.5126	98.7918	46	80	81.3424	110	99.3655	95.1197
Niben101Scf00146g00008	-	-	IPR003854;	sp|Q9LFR3|GASAE_ARATH	Gibberellin-regulated protein 14	-	-	-	-	0.93168	2.20933	1.03926	2.07852	0	2	2	2.32407	3	0	0	3.79609	5.26747	4	7.44055	7.39977	11	1.03926
Niben101Scf00146g00009	GO:0004571;GO:0005509;GO:0016020;	K10084	IPR001382;	sp|Q92611|EDEM1_HUMAN	ER degradation-enhancing alpha-mannosidase-like protein 1	-	GO:0016020//membrane;	GO:0004571//mannosyl-oligosaccharide 1,2-alpha-mannosidase activity;GO:0005509//calcium ion binding;	ko04141(Protein processing in endoplasmic reticulum)	0	2	0	1.02279	1.89805	0	0	0	0	52	45.7274	36.3355	1.10467	0	0	14.3697	26	17
Niben101Scf00146g00010	GO:0003824;GO:0006281;	K10773	IPR011257;	gb|EQB54220.1|	base excision DNA repair protein [Colletotrichum gloeosporioides Cg-14]	GO:0006281//DNA repair;	-	GO:0003824//catalytic activity;	ko03410(Base excision repair)	55.2726	77.6975	66	68.5911	67.0809	98.3152	88.337	88.337	64.6637	96	70	108.069	59	33.4819	51.1396	105.342	119.045	96
Niben101Scf00146g01002	GO:0004842;GO:0005488;GO:0005515;GO:0016567;	-	IPR013083;IPR016024;	sp|Q9FJP6|PUB38_ARATH	U-box domain-containing protein 38	GO:0016567//protein ubiquitination;	-	GO:0004842//ubiquitin-protein transferase activity;GO:0005488//binding;GO:0005515//protein binding;	-	375.173	422.11	244	492	522.916	377	430.944	518.556	323.617	310.781	192	656.894	247.892	229	296.189	266.46	307.097	222.401
Niben101Scf00146g02009	-	-	IPR015943;	sp|B4MFM2|WDR48_DROVI	WD repeat-containing protein 48 homolog	-	-	-	-	8.18234	8.5412	5.26747	9	5.31468	2.77491	9	4.15704	11.1802	7.73266	10.3926	13.5104	5.38864	3	8	23.2407	9	10.8006
Niben101Scf00146g02010	GO:0005737;GO:0006364;GO:0008649;	K03501	IPR003682;IPR029063;	sp|B8DD12|RSMG_LISMH	Ribosomal RNA small subunit methyltransferase G	GO:0006364//rRNA processing;	GO:0005737//cytoplasm;	GO:0008649//rRNA methyltransferase activity;	-	11.4319	19.5653	13.256	6.23556	10.3926	8.98107	8	11	26.7268	9	11.8807	5.11396	7.59218	5.26747	7	6.37761	4.62485	5
Niben101Scf00146g03007	GO:0003677;GO:0006355;	-	IPR003441;	sp|O49255|NAC29_ARATH	NAC transcription factor 29	GO:0006355//regulation of transcription, DNA-templated;	-	GO:0003677//DNA binding;	-	1	2.32407	1	2.16012	8.18234	2.84707	2.10699	3	4.25174	6.4748	3	4.15704	6.52176	6.62799	4.15704	1.03926	2.69432	2
Niben101Scf00148g00004	GO:0004857;GO:0030599;	-	IPR006501;	AT5G62360.1	Plant invertase/pectin methylesterase inhibitor superfamily protein LENGTH=203	-	-	GO:0004857//enzyme inhibitor activity;GO:0030599//pectinesterase activity;	-	1891	1685.82	1433.7	1421	2099.3	1434.79	2453.46	2198.03	748.267	323.318	513	481	173.143	78	77.7643	169.784	215.428	163.292
Niben101Scf00148g01005	GO:0004857;GO:0005618;GO:0030599;GO:0042545;	K01051	IPR006501;IPR011050;	sp|P83947|PME1_FICPW	Pectinesterase/pectinesterase inhibitor	GO:0042545//cell wall modification;	GO:0005618//cell wall;	GO:0004857//enzyme inhibitor activity;GO:0030599//pectinesterase activity;	ko00040(Pentose and glucuronate interconversions)	0	0	0	0	0	0	0	0	0	0	1.05349	0	0	0	0	0	0.93168	0
Niben101Scf00148g01007	GO:0005618;GO:0030599;GO:0042545;	K01051	IPR011050;	sp|O04887|PME2_CITSI	Pectinesterase 2	GO:0042545//cell wall modification;	GO:0005618//cell wall;	GO:0030599//pectinesterase activity;	ko00040(Pentose and glucuronate interconversions)	0	0	0.949023	0	0	0	0	1	0	0	0	0	0	0	0	0	0	0
Niben101Scf00148g01008	GO:0005789;GO:0007029;	-	IPR009787;	sp|Q6NVQ1|JAGN1_XENTR	Protein jagunal homolog 1	GO:0007029//endoplasmic reticulum organization;	GO:0005789//endoplasmic reticulum membrane;	-	-	312	261.893	218.945	304.888	324.249	421.939	415.823	398	239	144.092	181	154.449	86.9374	82.565	108.51	103	79.7201	69.3728
Niben101Scf00148g01009	GO:0003824;GO:0004553;GO:0005975;	K01179	IPR001701;IPR008928;	sp|Q9CAC1|GUN8_ARATH	Endoglucanase 8	GO:0005975//carbohydrate metabolic process;	-	GO:0003824//catalytic activity;GO:0004553//hydrolase activity, hydrolyzing O-glycosyl compounds;	ko00500(Starch and sucrose metabolism)	4	10	2.32407	95	86.4048	50.1168	1.89805	0	2	1427.52	1781.49	1520	55.0807	85.7145	44.1866	2748.84	2063.97	1915.66
Niben101Scf00148g01013	GO:0005618;GO:0030599;GO:0042545;	K01051	IPR011050;	sp|O04887|PME2_CITSI	Pectinesterase 2	GO:0042545//cell wall modification;	GO:0005618//cell wall;	GO:0030599//pectinesterase activity;	ko00040(Pentose and glucuronate interconversions)	0	0	3.18881	0	0	0	0.93168	3.314	2.07852	0	0	0	3	5.81017	5	1.08006	0	0
Niben101Scf00149g00007	GO:0005515;GO:0008270;	-	IPR013083;	sp|Q05A36|MEX3C_MOUSE	RNA-binding E3 ubiquitin-protein ligase MEX3C	-	-	GO:0005515//protein binding;GO:0008270//zinc ion binding;	-	121.513	99.7689	130.947	106.875	65	61	228.921	157	165.249	202.513	95.8513	185.415	146	148.811	132.271	91	111.201	97.8264
Niben101Scf00149g00008	-	K14617	IPR006876;	AT5G01460.1	LMBR1-like membrane protein LENGTH=509	-	-	-	-	681	677.197	563.559	670.01	744.821	707	757.873	653.029	727	703.578	628.884	652.857	600.692	562.239	602.63	937	755	779.725
Niben101Scf00149g01013	GO:0005488;	K06100	IPR016024;IPR021850;IPR022075;	sp|Q92797|SYMPK_HUMAN	Symplekin	-	-	GO:0005488//binding;	ko03015(mRNA surveillance pathway)	163.72	170	134.064	75.4661	122.618	134.064	256.697	207.463	248	44	74.3702	50	184.69	203.536	188.855	96.9215	103	90.3495
Niben101Scf00149g01014	GO:0006457;GO:0051082;	K09510	IPR001623;IPR002939;	sp|A2SIR5|DNAJ_METPP	Chaperone protein DnaJ	GO:0006457//protein folding;	-	GO:0051082//unfolded protein binding;	-	173.335	204	158	241.703	194	218.172	240.356	230.612	239.143	172	261.482	221.068	242	205.773	231.057	278.376	223.441	226.559
Niben101Scf00149g02001	GO:0005515;GO:0006355;GO:0008270;GO:0042393;	-	IPR013083;IPR021998;	sp|Q9FFF5|ALFL1_ARATH	PHD finger protein ALFIN-LIKE 1	GO:0006355//regulation of transcription, DNA-templated;	-	GO:0005515//protein binding;GO:0008270//zinc ion binding;GO:0042393//histone binding;	-	301.789	378.205	352	317.818	288.591	306	464.549	356.833	397.679	169.399	197.459	125.735	273	280	400.902	192	192.251	155.464
Niben101Scf00149g02017	GO:0008137;GO:0016651;GO:0055114;	K03936	IPR001268;IPR010218;	sp|B0SZ50|NUOC_CAUSK	NADH-quinone oxidoreductase subunit C	GO:0055114//obsolete oxidation-reduction process;	-	GO:0008137//NADH dehydrogenase (ubiquinone) activity;GO:0016651//oxidoreductase activity, acting on NAD(P)H;	ko00190(Oxidative phosphorylation)	40.0622	76.2219	59.2378	62.3556	30.5356	39	20	23.2407	17	7.56042	5.11396	9.49023	16.8559	8	19.1328	5.54982	15	3.11778
Niben101Scf00149g03001	GO:0004672;GO:0004674;GO:0005509;GO:0005524;GO:0006468;GO:0016772;	K13412	IPR011009;IPR011992;	AT3G51850.1	calcium-dependent protein kinase 13 LENGTH=528	GO:0006468//protein phosphorylation;	-	GO:0004672//protein kinase activity;GO:0004674//protein serine/threonine kinase activity;GO:0005509//calcium ion binding;GO:0005524//ATP binding;GO:0016772//transferase activity, transferring phosphorus-containing groups;	ko04626(Plant-pathogen interaction)	438.087	453	276.495	284.336	467.868	553.085	307	403.915	346.864	157	209.93	210.56	333.609	271.247	342.956	150.882	147	124
Niben101Scf00149g03002	GO:0003682;GO:0003700;GO:0005634;GO:0006351;GO:0006355;GO:0043565;	-	IPR001005;IPR027775;	sp|Q9SDW0|TGT3A_ARATH	Trihelix transcription factor GT-3a	GO:0006351//transcription, DNA-templated;GO:0006355//regulation of transcription, DNA-templated;	GO:0005634//nucleus;	GO:0003682//chromatin binding;GO:0003700//DNA-binding transcription factor activity;GO:0043565//sequence-specific DNA binding;	-	52.0838	147.07	35	51.963	35.4038	44.1866	38.4526	82.1015	23.3508	39	22	29.0509	22	25.9214	42.9573	103.443	126.419	85
Niben101Scf00149g03009	-	-	IPR012337;	gb|ABV21218.1|	[Arabidopsis thaliana]	-	-	-	-	0	0	0	0	0	0	0	0	0	0	1	0	0	0	0	0	0	0
Niben101Scf00149g04002	-	-	-	ref|XP_002525656.1|	conserved hypothetical protein [Ricinus communis] gb|EEF36774.1| conserved hypothetical protein [Ricinus communis]	-	-	-	-	20.4559	26.5726	8.42796	2	3.18881	4.62485	3	50.9237	40.9939	2.20933	0	1.03926	10.7773	20	23	0	0	0
Niben101Scf00149g05002	-	-	-	-	Unknown protein	-	-	-	-	10.3926	14.9069	5.52333	2.07852	7.27481	6.28675	17	26	29.0509	10	21.6012	10.2279	6.64316	10.5349	15	21.2587	22.1993	21
Niben101Scf00149g05003	-	-	IPR025846;IPR026057;	sp|Q8LED3|TBL3_ARATH	Protein trichome birefringence-like 3	-	-	-	-	28	13.9444	14	4.32024	25.5698	11.3883	16.8559	11	20.1958	16.6495	62	30.1385	14.9069	29.826	8.31407	30.1385	19.7584	15
Niben101Scf00149g06012	GO:0005507;GO:0005743;GO:0006825;GO:0006878;GO:0008535;	K07152	IPR003782;IPR012336;	sp|Q8VYP0|SCO11_ARATH	Protein SCO1 homolog 1, mitochondrial	GO:0006825//copper ion transport;GO:0006878//cellular copper ion homeostasis;GO:0008535//respiratory chain complex IV assembly;	GO:0005743//mitochondrial inner membrane;	GO:0005507//copper ion binding;	-	270	256.167	260.842	205	272.286	252.485	219.828	214.087	254.619	163.455	216	247	162.685	161	190.091	175.92	155.64	142.222
Niben101Scf00149g06013	GO:0004659;GO:0015995;GO:0016021;GO:0046408;	K04040	IPR000537;	ref|WP_008196576.1|	chitin-binding protein [Microcystis sp. T1-4] emb|CCI30484.1| Chlorophyll a synthase [Microcystis sp. T1-4]	GO:0015995//chlorophyll biosynthetic process;	GO:0016021//integral component of membrane;	GO:0004659//prenyltransferase activity;GO:0046408//chlorophyll synthetase activity;	ko00860(Porphyrin metabolism)	699.421	1024.71	491.264	319	498	971.461	475	676.117	770.163	135.71	79.0121	125	782.32	679.854	804	85.2193	58.6958	77.3266
Niben101Scf00149g06014	GO:0003676;GO:0003677;GO:0046983;	-	IPR003656;IPR007021;IPR008906;IPR012337;	AT3G13020.1	hAT transposon superfamily protein LENGTH=605	-	-	GO:0003676//nucleic acid binding;GO:0003677//DNA binding;GO:0046983//protein dimerization activity;	-	89.645	56.2536	27.5217	29.4979	75	116.923	91.5721	42	51.963	528.262	2019.33	745.149	47.8059	79.0334	84	1253	1191.09	1096
Niben101Scf00149g06015	GO:0003876;GO:0009168;GO:0019239;GO:0032264;	K01490	IPR006329;	sp|O80452|AMPD_ARATH	AMP deaminase	GO:0009168//purine ribonucleoside monophosphate biosynthetic process;GO:0032264//IMP salvage;	-	GO:0003876//AMP deaminase activity;GO:0019239//deaminase activity;	ko00230(Purine metabolism)	647	408.429	421.119	741.23	683.833	642.262	490.366	473	667	367.203	371	505.468	657.656	576.057	589.957	364	339.076	350.564
Niben101Scf00149g07003	-	-	IPR000389;	sp|P09443|LE19_GOSHI	Late embryogenesis abundant protein D-19	-	-	-	-	0	1	1.16203	1	1.08006	0	0	0	0	401.789	1213.56	324	1.03926	22.3603	4.41866	375.173	424.018	335.892
Niben101Scf00149g07004	-	-	IPR001763;	ref|NP_001032159.1|	thiosulfate sulfurtransferase 18 [Arabidopsis thaliana] gb|AED98169.1| sulfurtransferase 18 [Arabidopsis thaliana]	-	-	-	-	0	0	0	0.924971	0	0	0	0	0	2.07852	19.7584	2	0	4.64814	0	38.8822	48.0712	39.8589
Niben101Scf00149g08003	-	-	-	dbj|BAA76516.1|	HR7 [Hyoscyamus niger]	-	-	-	-	0	0	0	0	0	0	0	0	0	0	0	0	0	0	0	4	3.11778	2.79504
Niben101Scf00149g08004	-	K05573	IPR001750;	sp|A4J650|NUON_DESRM	NADH-quinone oxidoreductase subunit N	-	-	-	ko00190(Oxidative phosphorylation)	15	17.281	10.2279	9.49023	16.8559	14	2.12587	9.24971	14	7.27481	4.6584	3.314	7.27481	2.07852	14.3697	2	3	3.4861
Niben101Scf00149g08005	-	-	-	dbj|BAA76516.1|	HR7 [Hyoscyamus niger]	-	-	-	-	0	0	0	0	0	0	0	0	0	176	131.31	88	2.16012	0	1.89805	67.4237	78	68.0278
Niben101Scf00149g09004	-	K17046	IPR009057;IPR014876;	AT3G48710.1	DEK domain-containing chromatin associated protein LENGTH=462	-	-	-	-	0.898107	5	0	3.4861	0	3.24018	2.04559	3.79609	0	3	5.31468	6.4748	3	0	3.72672	1.10467	1.03926	0
Niben101Scf00149g10001	GO:0004672;GO:0004674;GO:0005509;GO:0005515;GO:0005524;GO:0006468;GO:0016772;GO:0030247;	-	IPR000742;IPR011009;IPR013320;IPR025287;	sp|Q9LMN6|WAK4_ARATH	Wall-associated receptor kinase 4	GO:0006468//protein phosphorylation;	-	GO:0004672//protein kinase activity;GO:0004674//protein serine/threonine kinase activity;GO:0005509//calcium ion binding;GO:0005515//protein binding;GO:0005524//ATP binding;GO:0016772//transferase activity, transferring phosphorus-containing groups;GO:0030247//polysaccharide binding;	-	335.005	665.809	662	1855.88	652.104	519	735.796	312.113	187.793	1993.3	2484.87	1508.82	128	102	155.713	1105	1074.66	848.918
Niben101Scf00149g10003	GO:0004672;GO:0005509;GO:0005515;GO:0005524;GO:0006468;GO:0016772;GO:0030247;	-	IPR000742;IPR011009;IPR013320;IPR025287;	sp|Q9LIG2|RLK6_ARATH	Receptor-like protein kinase	GO:0006468//protein phosphorylation;	-	GO:0004672//protein kinase activity;GO:0005509//calcium ion binding;GO:0005515//protein binding;GO:0005524//ATP binding;GO:0016772//transferase activity, transferring phosphorus-containing groups;GO:0030247//polysaccharide binding;	-	5.59008	9.94199	6.23556	16.6281	7.18485	7	10	5.81017	0	15.1208	22.5014	22.7765	4.21398	4	4.25174	23.1243	16	17.6674
Niben101Scf00149g10014	GO:0004672;GO:0004674;GO:0005524;GO:0006468;GO:0016772;	-	IPR011009;	sp|Q9LMN7|WAK5_ARATH	Wall-associated receptor kinase 5	GO:0006468//protein phosphorylation;	-	GO:0004672//protein kinase activity;GO:0004674//protein serine/threonine kinase activity;GO:0005524//ATP binding;GO:0016772//transferase activity, transferring phosphorus-containing groups;	-	0	0	0	0	0	1.05349	0	0	0	2	0	4.6584	0	0	0	1.79621	3	3
Niben101Scf00149g10020	GO:0005509;GO:0005515;GO:0030247;	-	IPR000742;IPR025287;	AT1G21270.1	wall-associated kinase 2 LENGTH=732	-	-	GO:0005509//calcium ion binding;GO:0005515//protein binding;GO:0030247//polysaccharide binding;	-	1544.44	2263.4	2391	2981.63	1483.23	1147.75	1898.73	1201.38	317.032	697	798	737.892	417	357.5	513.442	457.429	538.336	375
Niben101Scf00149g11001	-	-	-	emb|CAE05672.3|	OSJNBb0033P05.11 [Oryza sativa Japonica Group]	-	-	-	-	0	0	0	0	0	0	0	0	0	0	0	0	0	0	0	0	1.10467	0
Niben101Scf00149g11002	-	-	IPR024752;	gb|AES92348.2|	Myb/SANT-like DNA-binding domain protein [Medicago truncatula]	-	-	-	-	0	0	0	0	1.06294	0	0	0	0	0	0	0	0	0	0	0	0	0
Niben101Scf00149g11009	GO:0005488;GO:0006886;GO:0008536;	-	IPR016024;	sp|Q8K2V6|IPO11_MOUSE	Importin-11	GO:0006886//intracellular protein transport;	-	GO:0005488//binding;	-	399.076	337.268	315.934	261.893	212.009	331.401	416	328	438.087	127	145.808	129.895	308.432	369.777	366	198.769	182.219	140
Niben101Scf00149g12014	-	-	IPR001611;	sp|Q9LYN8|EXS_ARATH	Leucine-rich repeat receptor protein kinase EXS	-	-	-	-	150	189.412	110	17.281	56.2536	43.655	136.954	290	220.028	3.69988	6	2.07852	104.348	87.2685	121.593	32.217	15.2678	19
Niben101Scf00149g12016	-	-	IPR001623;IPR012336;	sp|Q2YT48|DNAJ_STAAB	Chaperone protein DnaJ	-	-	-	-	2266	3957.31	6408.2	3381	2604.38	2173.61	4246.33	1539.14	1342.72	394.269	673	726	777.401	625	869.448	1082.11	994.576	916.54
Niben101Scf00149g12019	-	-	IPR001611;IPR003591;IPR013210;	AT5G46330.1	Leucine-rich receptor-like protein kinase family protein LENGTH=1173	-	-	-	-	2460.97	2510.85	1139.7	236	800	863.392	1679	4058.86	2892.46	127.169	132.74	99	1412.64	1085.92	1291	213.048	250.622	228.666
Niben101Scf00149g12021	-	K01568	IPR012001;IPR029061;	sp|Q9M040|PDC4_ARATH	Pyruvate decarboxylase 4	-	-	-	ko00010(Glycolysis / Gluconeogenesis)	18.361	12.2735	18.9805	47.4073	25	27.6363	21.2743	25	14.5496	7.45344	20.9886	16.6281	24.9422	7.18485	11	7	15.1065	9
Niben101Scf00149g12022	-	K10863	IPR002589;	sp|D2TT52|YMDB_CITRI	O-acetyl-ADP-ribose deacetylase	-	-	-	-	0	3.11778	0.93168	1.10467	4.15704	4.15704	0.898107	5	1	0	0	1.08006	1.02279	0.949023	1.05349	2	0	0.924971
Niben101Scf00149t01001	-	-	-	-	-	-	-	-	-	0	0	0	0	0	0	0	0	0	0	0	2	0	0	0	0	0	0
Niben101Scf00150g00007	GO:0003924;GO:0005200;GO:0005525;GO:0005874;GO:0006184;GO:0007017;GO:0043234;GO:0051258;	K07374	IPR000217;IPR023123;	sp|P28268|TBA_EUPVA	Tubulin alpha chain	GO:0006184//obsolete GTP catabolic process;GO:0007017//microtubule-based process;GO:0051258//protein polymerization;	GO:0005874//microtubule;	GO:0003924//GTPase activity;GO:0005200//structural constituent of cytoskeleton;GO:0005525//GTP binding;	ko04145(Phagosome)	2515.75	1681	1834.63	1191.36	1711	2267.66	3596.28	3611.15	3884.75	1245.03	955.586	967	962	1227.11	1294	1878.22	1206.9	991.729
Niben101Scf00150g00008	GO:0005507;GO:0016491;GO:0055114;	K00423	IPR008972;	sp|P29162|ASOL_TOBAC	L-ascorbate oxidase homolog	GO:0055114//obsolete oxidation-reduction process;	-	GO:0005507//copper ion binding;GO:0016491//oxidoreductase activity;	ko00053(Ascorbate and aldarate metabolism)	0	0	0	0	0	0	1.16203	0	0	0	4.74511	3.16048	1	1.06294	0	2	2.07852	4.6584
Niben101Scf00150g01001	-	-	-	ref|XP_007028518.1|	Plant protein 1589 of Uncharacterized protein function isoform 4 [Theobroma cacao] gb|EOY09020.1| Plant protein 1589 of Uncharacterized protein function isoform 4 [Theobroma cacao]	-	-	-	-	0	0	0	0	0	0	0	0	0	0	0.93168	0	0	0	0	0	0	1.16203
Niben101Scf00150g01005	-	-	-	ref|XP_007028515.1|	Plant protein 1589 of Uncharacterized protein function isoform 1 [Theobroma cacao] gb|EOY09017.1| Plant protein 1589 of Uncharacterized protein function isoform 1 [Theobroma cacao]	-	-	-	-	22.1993	18	16.6281	8.38512	12.1513	14.5496	24.9422	12.5735	20	12	25.5648	24	14.0408	12.2735	16.1334	11.5884	15	14.8811
Niben101Scf00150g01014	GO:0005488;GO:0005515;GO:0006886;GO:0008536;	K20222	IPR007598;IPR016024;	sp|O74476|IMB3_SCHPO	Importin subunit beta-3	GO:0006886//intracellular protein transport;	-	GO:0005488//binding;GO:0005515//protein binding;	ko03013(Nucleocytoplasmic transport)	1469.3	1816	1495	2199.73	2559	2112.6	1913.64	1516.54	1818.33	2677	4196.47	2859.08	1697	1503.81	1440.38	4761.11	4028.17	4164.31
Niben101Scf00150g02005	-	K01056	IPR001328;	AT5G19830.1	Peptidyl-tRNA hydrolase family protein LENGTH=219	-	-	-	-	67.3806	103.242	98	81.846	66.5979	85	122.633	103.416	114.885	50.9237	65.4733	62.8675	85	105	142.93	62	84.2447	55.2308
Niben101Scf00150g02008	-	-	-	-	Unknown protein	-	-	-	-	0.93168	3.314	3.11778	6.23556	0	7	0	1.16203	3	3.24018	0	2.84707	2.10699	4	3.18881	4.62485	6	2.07852
Niben101Scf00150g02011	GO:0000166;GO:0003676;	K12900	IPR012677;	sp|Q3SZR8|SRSF3_BOVIN	Serine/arginine-rich splicing factor 3	-	-	GO:0000166//nucleotide binding;GO:0003676//nucleic acid binding;	ko03040(Spliceosome)	806.452	842	1068.18	986.995	833.242	1003.98	1168	1161.79	843.573	532	628.752	469.567	934.547	692.147	908.313	508.328	565	487
Niben101Scf00150g02012	-	-	-	AT4G08810.1	calcium ion binding LENGTH=552	-	-	-	-	11.6923	6.4748	10	6.23556	5.59008	15.4653	22.8637	13.5104	19.7584	3	2	6.97221	39	32.4018	37.8433	2.84707	0	2
Niben101Scf00150g03003	-	-	IPR007305;	sp|Q9CR60|GOT1B_MOUSE	Vesicle transport protein GOT1B	-	-	-	-	231.755	201.176	269	192	188.25	220	400.702	350.818	305.585	95.868	102	105.231	209.043	190	269.168	158.386	143.606	120.554
Niben101Scf00150g03004	GO:0016747;	-	IPR003480;IPR023213;	AT1G28680.1	HXXXD-type acyl-transferase family protein LENGTH=451	-	-	GO:0016747//acyltransferase activity, transferring groups other than amino-acyl groups;	-	877.556	1092.32	1117.76	622	642.013	579.957	679	927.019	488.2	225.352	259.815	225.519	347.567	328	386	326.532	245	245.174
Niben101Scf00150g03007	GO:0003824;GO:0008152;	-	IPR000873;	sp|B1M0M1|ACSA_METRJ	Acetyl-coenzyme A synthetase	GO:0008152//metabolic process;	-	GO:0003824//catalytic activity;	-	830.368	380.125	515.879	203.695	234.873	343.077	540	714	747.188	45	59.4033	57.2764	1113.2	1179.91	1307	163.692	142.445	135
Niben101Scf00150g04007	-	K03950	-	sp|Q9LHI0|NDUA6_ARATH	NADH dehydrogenase [ubiquinone] 1 alpha subcomplex subunit 6	-	-	-	ko00190(Oxidative phosphorylation)	257	158.037	207	131.767	131.94	243.899	239.143	289	284.867	77.6975	115	68.5911	237.578	176.746	222.401	110.161	69.1542	84
Niben101Scf00150g04010	-	-	-	gb|KEH20373.1|	rRNA-processing EBP2-like protein [Medicago truncatula]	-	-	-	-	2	0	0	0	0	0	4.41866	0	2.07852	3.59243	0	4	2.32407	4	1.08006	2.04559	0	0
Niben101Scf00150g04013	GO:0003676;GO:0005524;	K11594	IPR014001;IPR027417;	sp|Q0UWA6|DED1_PHANO	ATP-dependent RNA helicase DED1	-	-	GO:0003676//nucleic acid binding;GO:0005524//ATP binding;	-	141.339	136.143	35.9243	36	49	113.879	69	70.2039	115.576	11.3883	31.6048	10	176.447	131.346	147	53.0022	54.9691	28.7213
Niben101Scf00150g04014	-	K00558	IPR023780;IPR029063;	sp|Q8LPU5|CMT3_MAIZE	DNA (cytosine-5)-methyltransferase 3	-	-	-	ko00270(Cysteine and methionine metabolism)	0	0	0	0	0	0	0	0	0	0	0	0	0	0	2	0	0	1
Niben101Scf00151g00006	-	K14795	IPR009292;	sp|C9S8J9|RRP36_VERA1	rRNA biogenesis protein RRP36	-	-	-	-	77	102.887	72.671	92.7919	103.926	106.004	93.4031	93	80	110.393	114	112.326	69.5499	82.565	119.045	128	142.433	133.196
Niben101Scf00151g03002	-	-	-	sp|Q9LVZ6|PDCT2_ARATH	Phosphatidylcholine:diacylglycerol cholinephosphotransferase 2	-	-	-	-	1	4	0	2	1.08006	3.06838	0.949023	1.05349	1	5.31468	0.924971	2	1.03926	1.86336	0	4.15704	2.07852	2.69432
Niben101Scf00151g03003	GO:0003677;GO:0005634;	-	IPR016177;	sp|Q9XI36|MBD10_ARATH	Methyl-CpG-binding domain-containing protein 10	-	GO:0005634//nucleus;	GO:0003677//DNA binding;	-	214.913	221	170.07	416.237	295	272.286	250.622	223.142	283.718	311.778	269.432	463	558	694.897	609	361.82	337.522	247.695
Niben101Scf00151g04004	-	-	IPR025124;	AT5G25360.1	unknown protein; BEST Arabidopsis thaliana protein match is: unknown protein . LENGTH=169	-	-	-	-	101.629	89.3763	67.5518	95.1993	88	124	127.824	132	117.727	62.3903	78.7689	74.7981	159	103.105	130.421	109	95.6118	84.7829
Niben101Scf00151g05008	GO:0005488;GO:0005515;	K20222	IPR016024;	ref|XP_003629733.1|	Ran-binding protein [Medicago truncatula] gb|AET04209.1| importin beta-3, putative [Medicago truncatula]	-	-	GO:0005488//binding;GO:0005515//protein binding;	ko03013(Nucleocytoplasmic transport)	59	104.766	115.576	228.714	198.057	105	125.426	73.0727	70	130.947	107.143	181.165	27.0207	23.903	32.3318	200	213	208.004
Niben101Scf00151g05009	-	-	-	-	Unknown protein	-	-	-	-	56.4232	46	72.7481	54.0374	85.0592	119.515	95.6118	75.441	99	72	88.3146	99	93.9652	77.7322	86.3611	81.1191	58	57.3985
Niben101Scf00151g06003	GO:0005488;	K20222	IPR016024;	AT5G19820.1	ARM repeat superfamily protein LENGTH=1116	-	-	GO:0005488//binding;	ko03013(Nucleocytoplasmic transport)	0	0	0	0	1	0	0	0	0	2	0	0	0	0	0	0	0	0
Niben101Scf00151g06005	-	-	IPR009269;	sp|Q5M9Q1|NKAPL_HUMAN	NKAP-like protein	-	-	-	-	325.515	489.875	406	383.72	422.712	352	566.396	480.747	374.481	385.565	419.861	419.416	264	345	376.499	457	428.784	395.821
Niben101Scf00151g07004	GO:0004553;GO:0005975;	K05349	IPR017853;IPR026892;	ref|XP_002523937.1|	hydrolase, hydrolyzing O-glycosyl compounds, putative [Ricinus communis] gb|EEF38424.1| hydrolase, hydrolyzing O-glycosyl compounds, putative [Ricinus communis]	GO:0005975//carbohydrate metabolic process;	-	GO:0004553//hydrolase activity, hydrolyzing O-glycosyl compounds;	ko00940(Phenylpropanoid biosynthesis);ko00500(Starch and sucrose metabolism);ko00460(Cyanoamino acid metabolism)	12.1118	13.256	64.4341	121.593	79.0334	43	2	3.4861	3	37.8021	36.8205	40.808	0	1	0	22.1993	12	11.4319
Niben101Scf00151g07005	GO:0004553;GO:0005975;	K05349	IPR017853;IPR026892;	ref|XP_002523937.1|	hydrolase, hydrolyzing O-glycosyl compounds, putative [Ricinus communis] gb|EEF38424.1| hydrolase, hydrolyzing O-glycosyl compounds, putative [Ricinus communis]	GO:0005975//carbohydrate metabolic process;	-	GO:0004553//hydrolase activity, hydrolyzing O-glycosyl compounds;	ko00940(Phenylpropanoid biosynthesis);ko00500(Starch and sucrose metabolism);ko00460(Cyanoamino acid metabolism)	1.16203	0	0	10.2279	4.74511	5.26747	0	0	0	5	2.07852	2.79504	0	0	0	2.69432	2	2
Niben101Scf00151g07009	GO:0004553;GO:0005975;	K05349	IPR002772;IPR017853;IPR026892;	ref|XP_002523935.1|	hydrolase, hydrolyzing O-glycosyl compounds, putative [Ricinus communis] gb|EEF38422.1| hydrolase, hydrolyzing O-glycosyl compounds, putative [Ricinus communis]	GO:0005975//carbohydrate metabolic process;	-	GO:0004553//hydrolase activity, hydrolyzing O-glycosyl compounds;	ko00940(Phenylpropanoid biosynthesis);ko00500(Starch and sucrose metabolism);ko00460(Cyanoamino acid metabolism)	2299.13	1519.73	2095	869.86	967.084	1725.49	3310.04	2588.79	3399.33	3400	5466	2853.96	3582	2937.76	3175.77	4068.46	3665.11	3108
Niben101Scf00151g09004	-	-	IPR011006;	sp|Q54YZ9|DHKJ_DICDI	Hybrid signal transduction histidine kinase J	-	-	-	-	1.03926	0.898107	1	0	0	6	12.9607	12.2735	25.6236	4.21398	0	5.31468	13.8746	15	16.6281	4.6584	3.314	1.03926
Niben101Scf00151g10011	GO:0003824;GO:0005506;GO:0009055;GO:0016491;GO:0016614;GO:0046872;GO:0050660;GO:0051536;GO:0051537;GO:0055114;	K09842	IPR012675;IPR016166;IPR016208;	AT1G04580.1	aldehyde oxidase 4 LENGTH=1337	GO:0055114//obsolete oxidation-reduction process;	-	GO:0003824//catalytic activity;GO:0005506//iron ion binding;GO:0009055//electron transfer activity;GO:0016491//oxidoreductase activity;GO:0016614//oxidoreductase activity, acting on CH-OH group of donors;GO:0046872//metal ion binding;GO:0050660//flavin adenine dinucleotide binding;GO:0051536//iron-sulfur cluster binding;GO:0051537//2 iron, 2 sulfur cluster binding;	ko00906(Carotenoid biosynthesis)	3901.95	2573.75	3705.14	2657	2792.33	2394.75	4084	3608.31	2724.23	972.105	898.959	822.054	3729.84	3832	4299	1625.69	1172	1137.3
Niben101Scf00151g10016	GO:0003824;GO:0005506;GO:0016491;GO:0016614;GO:0046872;GO:0050660;GO:0055114;	K09842	IPR016166;IPR016208;	AT1G04580.1	aldehyde oxidase 4 LENGTH=1337	GO:0055114//obsolete oxidation-reduction process;	-	GO:0003824//catalytic activity;GO:0005506//iron ion binding;GO:0016491//oxidoreductase activity;GO:0016614//oxidoreductase activity, acting on CH-OH group of donors;GO:0046872//metal ion binding;GO:0050660//flavin adenine dinucleotide binding;	ko00906(Carotenoid biosynthesis)	104.965	115.528	118.199	76.9052	77.9444	72.7467	117	91	144.092	40	42.1223	33.7522	105.342	103.242	100	75.4684	45.3236	49
Niben101Scf00152g00001	-	-	-	sp|Q9LQZ7|BBX21_ARATH	B-box zinc finger protein 21	-	-	-	-	2	3.4861	1	12.9607	5.11396	6.64316	2.10699	1	0	0.924971	0	3.11778	0	0	0	0	0.898107	3
Niben101Scf00152g02006	-	-	-	-	Unknown protein	-	-	-	-	1	1.06294	0.924971	2	0	0	1.10467	1.03926	2.07852	1.79621	0	0	0	4	0	1.02279	1.89805	2.10699
Niben101Scf00152g03006	-	-	IPR011990;IPR011992;	AT2G32450.1	Calcium-binding tetratricopeptide family protein LENGTH=802	-	-	-	-	54.0415	50.9237	48.4978	22	28	39.5092	70	66.9637	86.9374	4.74511	14.7489	20	119.049	121.171	123	34.2956	26.087	44.1866
Niben101Scf00152g03012	-	-	-	ref|XP_007017698.1|	Chaperone DnaJ-domain superfamily protein isoform 3 [Theobroma cacao] gb|EOY14923.1| Chaperone DnaJ-domain superfamily protein isoform 3 [Theobroma cacao]	-	-	-	-	0	0	0	0	0	0	0	1	0	0	1.10467	0	0	0	0	2	0	0
Niben101Scf00152g03022	-	-	IPR011992;	sp|Q9HAE3|EFCB1_HUMAN	EF-hand calcium-binding domain-containing protein 1	-	-	-	-	16	17.6674	13.0435	9.94199	6.23556	12.4711	12.5735	14	26	0	3	3.24018	38.8661	38.9099	37.9258	7	6.37761	9.24971
Niben101Scf00152g03025	-	K14798	-	sp|Q6NSQ7|LTV1_MOUSE	Protein LTV1 homolog	-	-	-	-	1047	827	1091.15	820	1331.71	865.282	1198.62	955.52	1043	731.299	906.471	1148	780.484	646.586	733.498	1156.7	967.55	784.945
Niben101Scf00152g03029	-	-	IPR001623;	gb|AIU49228.1|	ARC6, partial [Arabidopsis thaliana]	-	-	-	-	1053.49	728	560.167	362.589	570	951.961	879.506	1247.17	1287.64	221.362	192.195	276	485	484.568	506	190.091	131.94	160.385
Niben101Scf00152g03031	GO:0003777;GO:0005524;GO:0005871;GO:0007018;GO:0008017;	K11498	IPR001752;IPR021881;IPR027417;IPR027640;	AT4G24170.1	ATP binding microtubule motor family protein LENGTH=1004	GO:0007018//microtubule-based movement;	GO:0005871//kinesin complex;	GO:0003777//microtubule motor activity;GO:0005524//ATP binding;GO:0008017//microtubule binding;	-	17.6746	11.4319	5.1963	7.18485	4	13	3.4861	6	9.72054	3.06838	2.84707	1.05349	4	11.6923	3.69988	1	1.03926	1.86336
Niben101Scf00152g06001	GO:0004672;GO:0004674;GO:0005515;GO:0005524;GO:0006468;GO:0016772;	-	IPR001611;IPR003591;IPR011009;IPR013210;IPR013320;IPR025875;	sp|Q8W4G6|CRK15_ARATH	Cysteine-rich receptor-like protein kinase 15	GO:0006468//protein phosphorylation;	-	GO:0004672//protein kinase activity;GO:0004674//protein serine/threonine kinase activity;GO:0005515//protein binding;GO:0005524//ATP binding;GO:0016772//transferase activity, transferring phosphorus-containing groups;	-	4	5.4003	1.02279	0	6.32097	5	3.18881	1.84994	3	13.5104	5.59008	6.62799	4.15704	5.1963	0.898107	5	12	10.4583
Niben101Scf00152g09005	-	-	-	sp|F4JLS1|LDL3_ARATH	Lysine-specific histone demethylase 1 homolog 3	-	-	-	-	760.326	930	906.234	839.443	1047.22	797.112	1171.25	829.851	892	1072	1653.58	1246	896.45	812.097	876.897	1310.55	1082	1200.05
Niben101Scf00152g09015	GO:0015078;GO:0015991;GO:0033177;GO:0033179;	K02155	IPR000245;IPR002379;	sp|Q40585|VATL_TOBAC	V-type proton ATPase 16 kDa proteolipid subunit	-	GO:0033177//proton-transporting two-sector ATPase complex, proton-transporting domain;GO:0033179//proton-transporting V-type ATPase, V0 domain;	GO:0015078//proton transmembrane transporter activity;	ko04145(Phagosome);ko00190(Oxidative phosphorylation)	872.96	871	1021	1228.27	950	1259.35	1293.83	1015.45	1121.97	1088	1344.61	1057.24	736	743.07	818.946	1557.58	1216.97	1240.88
Niben101Scf00152g13012	-	-	-	-	Unknown protein	-	-	-	-	16.1334	20.0164	10	5.31468	11.0996	39	17.6674	17.7019	30.9306	2.07852	1.03926	1.79621	9	14	16.2685	10	2.16012	4.09117
Niben101Scf00152g13013	-	-	IPR011043;IPR014756;IPR015916;	AT1G75620.1	glyoxal oxidase-related protein LENGTH=547	-	-	-	-	6.52176	33.14	37.4133	215.127	178.723	87	12	13.9444	3	3.24018	10.2279	8.5412	1.05349	0	0	0.924971	0	0
Niben101Scf00152g14002	-	-	IPR011043;IPR014756;IPR015916;	AT1G75620.1	glyoxal oxidase-related protein LENGTH=547	-	-	-	-	1.16203	8	8.64048	52.1624	32.2668	13.6954	2	2.12587	3.69988	3	2.07852	0	0	1.03926	0	0	1	0
Niben101Scf00152g16003	-	-	-	ref|NP_001148819.1|	cell growth defect factor 2 [Zea mays] gb|ACG33018.1| cell growth defect factor 2 [Zea mays]	-	-	-	-	41.4545	45.3236	48	43.6489	33.5405	59.6519	72.7481	80.023	46.7016	16	31	6.97221	29	29.1616	49.094	16.1334	5.26747	4
Niben101Scf00152g18002	GO:0003700;GO:0006355;GO:0043565;	-	IPR004827;	AT4G38900.1	Basic-leucine zipper (bZIP) transcription factor family protein LENGTH=553	GO:0006355//regulation of transcription, DNA-templated;	-	GO:0003700//DNA-binding transcription factor activity;GO:0043565//sequence-specific DNA binding;	-	232.794	139.207	159	132	283.536	259	171.729	159.556	204.989	164.345	156	226.405	90.6471	84	94.5726	241.305	262.91	232.794
Niben101Scf00152g18004	-	-	IPR010409;	gb|ABU50826.1|	GAGA-binding transcriptional activator [Arabidopsis arenosa]	-	-	-	-	401.957	297.044	335.011	150	188.14	309.865	564	482.216	506.834	86.1639	73.7874	67.5518	203.87	222	219	47.6434	53	48.6027
Niben101Scf00152g18006	GO:0000278;GO:0007032;GO:0051301;	-	IPR009091;IPR028641;	AT1G19880.1	Regulator of chromosome condensation (RCC1) family protein LENGTH=538	GO:0000278//mitotic cell cycle;GO:0007032//endosome organization;GO:0051301//cell division;	-	-	-	482.216	410.871	465.064	463.51	506.119	413.129	533	366	570.559	218	338.059	319.111	356.832	416.13	348	288.055	209.968	260
Niben101Scf00152g19010	-	-	IPR000048;IPR025064;IPR027417;	sp|Q9FXI5|IQD32_ARATH	Protein IQ-DOMAIN 32	-	-	-	-	489	424.143	361	262.455	434.687	434.652	524.64	367	673.901	472.66	617	740.992	568.325	668.322	599.653	474.941	336.79	378
Niben101Scf00152g19011	-	K17434	IPR007741;IPR012336;	sp|Q2HJF1|RM53_BOVIN	39S ribosomal protein L53, mitochondrial	-	-	-	-	150	112.671	127.646	137	157.967	131.367	131.455	142.379	200.577	182.316	275	209	120.852	93	103.686	136.031	136.659	150.65
Niben101Scf00152g20002	GO:0003677;GO:0005634;GO:0006355;GO:0009725;GO:0046983;	K14486	IPR003311;IPR010525;IPR015300;	sp|P93024|ARFE_ARATH	Auxin response factor 5	GO:0006355//regulation of transcription, DNA-templated;GO:0009725//response to hormone;	GO:0005634//nucleus;	GO:0003677//DNA binding;GO:0046983//protein dimerization activity;	ko04075(Plant hormone signal transduction)	306.581	199.538	332.3	164	144	293.995	364	227.893	186.148	161.334	223.341	146	104.168	103.597	82	350.23	276.709	234.189
Niben101Scf00152g21007	-	K14488	IPR003676;	AT1G75590.1	SAUR-like auxin-responsive protein family LENGTH=154	-	-	-	ko04075(Plant hormone signal transduction)	1.08006	4.09117	2.84707	11.5884	5	4.25174	0.924971	0	4.15704	1.86336	1.10467	0	2.07852	2.69432	7	0	0	1
Niben101Scf00152g22008	-	-	IPR008587;	sp|Q9C698|FPP6_ARATH	Filament-like plant protein 6	-	-	-	-	130	75.8659	91.3046	11.0467	47.8059	70.6696	174.233	131	123	15.1065	11	9.72054	78.755	81.6159	66.3702	33	10.6294	12.0246
Niben101Scf00152g22009	-	-	-	gb|ABD32938.2|	Pathogen-related protein, related [Medicago truncatula]	-	-	-	-	4	0	0	0	1.08006	0	1.89805	2.10699	1	3.18881	6.4748	4	6.23556	30.7454	4.41866	4.15704	0	0.898107
Niben101Scf00152g23005	-	K12619	-	sp|Q9FQ03|XRN3_ARATH	5'-3' exoribonuclease 3	-	-	-	ko03018(RNA degradation);ko03008(Ribosome biogenesis in eukaryotes)	0	0	0	0	0	0	0	0	0	0	0	0	0	0	1	1.08006	0	0
Niben101Scf00152g25013	GO:0003824;GO:0004553;GO:0005975;	-	IPR001701;IPR008928;	sp|Q9FXI9|GUN2_ARATH	Endoglucanase 2	GO:0005975//carbohydrate metabolic process;	-	GO:0003824//catalytic activity;GO:0004553//hydrolase activity, hydrolyzing O-glycosyl compounds;	-	106.048	167.321	25.9815	17.9621	59	131	22.0787	47	118.807	19.4331	10.4392	22.1234	128	92.4754	105.447	43	29.0993	31.6771
Niben101Scf00152g25014	GO:0004164;GO:0008152;GO:0008168;GO:0017183;	K00586	IPR000878;IPR004551;	sp|Q75JG8|DPH5_DICDI	Diphthine synthase	GO:0008152//metabolic process;GO:0017183//peptidyl-diphthamide biosynthetic process from peptidyl-histidine;	-	GO:0004164//diphthine synthase activity;GO:0008168//methyltransferase activity;	-	77	128.527	76.7094	37.9609	48.4608	87	66.9649	103.597	137	30.1385	59.6275	41.9773	72.7481	54.0415	52.0902	45	32	45.3194
Niben101Scf00152g25016	-	K06966	IPR005269;	sp|Q5ZC82|LOG_ORYSJ	Cytokinin riboside 5'-monophosphate phosphoribohydrolase LOG	-	-	-	ko00240(Pyrimidine metabolism);ko00230(Purine metabolism)	944.395	506	855.31	112.733	162.386	382.447	1505.89	1243.88	1313	76	132.472	120	1414.88	1477.94	1624.73	343.439	234	214.713
Niben101Scf00152g25020	GO:0031072;GO:0051082;	-	IPR001305;	sp|A7GT07|DNAJ_BACCN	Chaperone protein DnaJ	-	-	GO:0031072//heat shock protein binding;GO:0051082//unfolded protein binding;	-	139.207	240	62	69.7221	129	254.894	42.9573	95.8513	150.65	6	14.8811	16.6495	228	244.226	182.609	14.3606	16.6281	15.5889
Niben101Scf00153g00010	-	K12820	IPR007502;IPR027417;	sp|Q68FK8|DHX9_XENLA	ATP-dependent RNA helicase A-like protein	-	-	-	ko03040(Spliceosome)	27.5217	42.1398	17	22.3216	33.2989	31	48.8452	33.5405	50.8146	16.6281	19.7459	19.7584	41	31	66.236	14	20.5211	20.4559
Niben101Scf00153g00017	-	K12820	IPR001650;IPR014001;IPR027417;	sp|P53131|PRP43_YEAST	Pre-mRNA-splicing factor ATP-dependent RNA helicase PRP43	-	-	-	ko03040(Spliceosome)	146.274	156.862	127.829	84.18	79.9315	136	188	192.898	158	52.9229	64.4359	57.8904	167.506	183	194.517	93.422	78	72.7481
Niben101Scf00153g00020	-	-	IPR011598;	sp|P19484|TFEB_HUMAN	Transcription factor EB	-	-	-	-	37.1851	50	12.9607	26.5926	21.8275	34.7653	31	14.8811	40.6987	13	11.4319	15.8386	78.4312	53.0022	68.5911	2.69432	6	5
Niben101Scf00153g00021	GO:0003824;GO:0004553;GO:0004559;GO:0005975;GO:0006013;GO:0008270;GO:0015923;GO:0030246;	K01191	IPR011013;IPR011330;IPR013780;IPR028995;	sp|C0HJB3|MANA_CANEN	Alpha-mannosidase	GO:0005975//carbohydrate metabolic process;GO:0006013//mannose metabolic process;	-	GO:0003824//catalytic activity;GO:0004553//hydrolase activity, hydrolyzing O-glycosyl compounds;GO:0004559//alpha-mannosidase activity;GO:0008270//zinc ion binding;GO:0015923//mannosidase activity;GO:0030246//carbohydrate binding;	ko00511(Other glycan degradation)	1750.65	1017.47	662	579.907	830.127	1556.47	823.093	1521.48	1506.13	1127	855	1336.34	1464	1608.21	1777.61	2435.19	2600.02	2679
Niben101Scf00153g00023	GO:0004185;GO:0006508;	K16297	IPR001563;IPR029058;	sp|Q93Y09|SCP45_ARATH	Serine carboxypeptidase-like 45	GO:0006508//proteolysis;	-	GO:0004185//serine-type carboxypeptidase activity;	-	17.6674	17.064	20	12	9.29628	26	29.1616	39.8889	61.6865	4.21398	1	3.18881	153.545	189	204.734	2.79504	5.52333	1.03926
Niben101Scf00154g00002	-	K08232	-	AT3G27820.1	monodehydroascorbate reductase 4 LENGTH=488	-	-	-	ko00053(Ascorbate and aldarate metabolism)	5.11396	0.949023	2.10699	1	2.12587	3.69988	1	1.03926	0.93168	4.41866	2.07852	1.03926	3.59243	3	2	1.16203	1	0
Niben101Scf00154g01001	-	K00797	IPR001045;IPR029063;IPR030373;	sp|A6TRI3|SPEE_ALKMQ	Polyamine aminopropyl transferase	-	-	-	ko00480(Glutathione metabolism);ko00330(Arginine and proline metabolism);ko00270(Cysteine and methionine metabolism)	1354.15	1012.74	1251.59	1370.78	1654.5	1795.32	1322	1252	1535.05	1004	1405.16	1401.23	1071.45	918.647	1059	1685.82	1365.26	1411
Niben101Scf00154g04002	-	-	-	-	Unknown protein	-	-	-	-	0	0	0	0	0	0	0	0	0	0	0	2.07852	0	0	0	1.03926	0	0
Niben101Scf00154g04003	-	K08518	-	ref|XP_007026670.1|	Transducin family protein / WD-40 repeat family protein, putative isoform 2 [Theobroma cacao] gb|EOY07172.1| Transducin family protein / WD-40 repeat family protein, putative isoform 2 [Theobroma cacao]	-	-	-	-	2	1.06294	6.4748	89	75.8659	41.9256	8.83732	6.23556	1.03926	132.92	135	516	10.4583	3	2.16012	186.148	215.428	269.695
Niben101Scf00154g05016	-	K08518	-	ref|XP_007026670.1|	Transducin family protein / WD-40 repeat family protein, putative isoform 2 [Theobroma cacao] gb|EOY07172.1| Transducin family protein / WD-40 repeat family protein, putative isoform 2 [Theobroma cacao]	-	-	-	-	0	1.03926	0.898107	13	3	3.4861	1	3.24018	1.02279	9.49023	7.37446	9	1.06294	0	0	5.1963	3.72672	5.52333
Niben101Scf00154g05017	GO:0000166;GO:0003676;GO:0008270;	K12896	IPR001878;IPR012677;	sp|Q9D0B0|SRSF9_MOUSE	Serine/arginine-rich splicing factor 9	-	-	GO:0000166//nucleotide binding;GO:0003676//nucleic acid binding;GO:0008270//zinc ion binding;	ko03040(Spliceosome)	109.086	69.5499	98.6983	181.201	198	157.314	89.7222	118	68.5911	53.1057	68.4892	86.2585	138.221	108.671	162	88	87.1526	56
Niben101Scf00154g09001	GO:0015079;GO:0016020;GO:0071805;	K03549	IPR003855;	sp|Q8W4I4|POT6_ARATH	Potassium transporter 6	GO:0071805//potassium ion transmembrane transport;	GO:0016020//membrane;	GO:0015079//potassium ion transmembrane transporter activity;	-	456	377.251	256.212	230.875	250.461	325.288	317.93	423	420	283.536	179	276.495	291.496	280.911	417.184	241	214.713	170.195
Niben101Scf00155g00008	GO:0003824;GO:0008152;	K00167	IPR005475;IPR005476;IPR009014;IPR029061;	sp|B1I3J6|DXS_DESAP	1-deoxy-D-xylulose-5-phosphate synthase	GO:0008152//metabolic process;	-	GO:0003824//catalytic activity;	ko00640(Propanoate metabolism);ko00280(Valine, leucine and isoleucine degradation)	2142	1674	1933.63	1074	1728.1	1773.52	3012.2	2891.84	2257	597.37	569.782	706	1492.38	1474.85	2102.18	1265.82	1088.1	737.346
Niben101Scf00155g00009	GO:0003677;GO:0006352;	K03120	IPR000814;	sp|P26357|TBP_SOLTU	TATA-box-binding protein	GO:0006352//DNA-templated transcription, initiation;	-	GO:0003677//DNA binding;	ko03022(Basal transcription factors)	241.25	242	261.482	228.468	260	329.445	334.473	330.295	265.011	346.073	423.906	437	180	160.361	246	422.303	413.208	317.923
Niben101Scf00155g00010	-	K12626	IPR010920;IPR017132;	AT2G03870.2	Small nuclear ribonucleoprotein family protein LENGTH=99	-	-	-	ko03040(Spliceosome);ko03018(RNA degradation)	34.2446	40.5311	30.1385	14.3697	41	40	25.5648	42	43.2024	30.6838	29.4197	67.4237	49	30.8251	38.8488	41	42.6096	45.6523
Niben101Scf00155g01007	GO:0003723;GO:0006353;GO:0006355;	-	IPR011605;	sp|Q18B61|NUSB_PEPD6	N utilization substance protein B homolog	GO:0006353//DNA-templated transcription, termination;GO:0006355//regulation of transcription, DNA-templated;	-	GO:0003723//RNA binding;	-	192	239.773	82.8462	51.2472	171.72	257	105.231	130.421	176	23.903	10.2485	14.3606	144.457	221.362	151.78	10	10	11.6203
Niben101Scf00155g01009	GO:0005524;GO:0016887;	K05658	IPR003439;IPR027417;	sp|Q6D437|MSBA_PECAS	Lipid A export ATP-binding/permease protein MsbA	-	-	GO:0005524//ATP binding;GO:0016887//ATP hydrolysis activity;	ko02010(ABC transporters)	0	0	0	0	0	0	0	0	0	0	1.16203	0	0	0	0	0	0	0
Niben101Scf00155g03002	-	K08506	IPR000727;	sp|Q9SF29|SYP71_ARATH	Syntaxin-71	-	-	-	ko04130(SNARE interactions in vesicular transport)	497.551	535	542	712.327	651	676.117	499.123	495.39	627.883	381	404.978	415.312	399	346.073	358.697	875.999	647.458	712.932
Niben101Scf00155g04002	-	-	-	emb|CDY56020.1|	BnaA08g29280D [Brassica napus]	-	-	-	-	79.7179	95.868	91	81.846	94.347	93	106.004	97.8264	124.827	116.397	163.164	202.972	74	90	105.745	180	144.728	145.237
Niben101Scf00155g04010	GO:0005515;GO:0008270;	K11982	IPR013083;	sp|Q9H9V4|RN122_HUMAN	RING finger protein 122	-	-	GO:0005515//protein binding;GO:0008270//zinc ion binding;	-	32.6088	62.9659	13.5104	11.4319	24.2489	44	13	49.9675	51	8.64048	9.20513	0.949023	34.7653	20	41.4545	6.4748	8	6.23556
Niben101Scf00155g04014	GO:0000287;GO:0003824;GO:0004743;GO:0006096;GO:0030955;	K00873	IPR001697;	AT5G56350.1	Pyruvate kinase family protein LENGTH=498	GO:0006096//glycolytic process;	-	GO:0000287//magnesium ion binding;GO:0003824//catalytic activity;GO:0004743//pyruvate kinase activity;GO:0030955//potassium ion binding;	ko00620(Pyruvate metabolism);ko00010(Glycolysis / Gluconeogenesis)	467.138	396	484.947	973.698	610.221	757.463	465	515.524	488.385	1036	709.814	785.406	773.266	632.909	616.281	907.986	776	856
Niben101Scf00156g01002	-	-	-	AT2G36835.1	unknown protein; FUNCTIONS IN: molecular_function unknown; INVOLVED IN: biological_process unknown; LOCATED IN: chloroplast envelope; EXPRESSED IN: 22 plant structures; EXPRESSED DURING: 13 growth stages; Has 26 Blast hits to 26 proteins in 11 species: Archae - 0; Bacteria - 0; Metazoa - 0; Fungi - 0; Plants - 26; Viruses - 0; Other Eukaryotes - 0 (source: NCBI BLink). LENGTH=124	-	-	-	-	276.363	252.517	242	408.429	430.436	421.982	249.422	282.679	183.214	181	250	259.134	174	186.85	216.832	186.957	171.72	180
Niben101Scf00156g03002	GO:0003677;GO:0003682;	K09422	IPR009057;	sp|Q9Y222|DMTF1_HUMAN	Cyclin-D-binding Myb-like transcription factor 1	-	-	GO:0003677//DNA binding;GO:0003682//chromatin binding;	-	0	0	0	0	0	0	2.16012	0	0	0	0	0	0	0	0	0	0	0
Niben101Scf00157g00004	-	-	-	ref|NP_001266269.1|	chordin [Solanum lycopersicum] gb|ABA18635.1| inducible plastid-lipid associated protein [Solanum lycopersicum]	-	-	-	-	20.4559	0.949023	9.48145	5	11.6923	14.7995	25	19.7459	19.5653	11.0467	14.5496	15.5889	23.3508	29	47	36.0231	42	41.0423
Niben101Scf00157g00006	-	-	IPR013813;	gb|KGI59835.1|	endoribonuclease L-PSP [Prevotella sp. S7 MS 2]	-	-	-	-	4.15704	11.1802	4.41866	6.23556	7.27481	5.38864	6	10	6.97221	6	4.32024	12.2735	4.74511	5.26747	6	6.37761	1.84994	6
Niben101Scf00157g00019	GO:0003993;GO:0016787;GO:0046872;	-	IPR008963;IPR025733;IPR029052;	sp|Q9LJU7|PPA18_ARATH	Purple acid phosphatase 18	-	-	GO:0003993//acid phosphatase activity;GO:0016787//hydrolase activity;GO:0046872//metal ion binding;	-	330	244.027	226	156.609	198.422	248.644	445.628	383	455.999	152.62	161	188.106	559.008	691.52	678.636	464.549	435.582	473
Niben101Scf00157g00020	GO:0016020;	-	IPR005349;	AT1G50740.1	Transmembrane proteins 14C LENGTH=119	-	GO:0016020//membrane;	-	-	146	113.734	116.546	128	165.242	182.609	213.2	178.753	148.614	79.9315	82	84	89.4767	100	136.088	87.9602	68.3296	52.6747
Niben101Scf00157g00021	-	K12188	IPR007286;IPR011991;	sp|Q5RJU0|SNF8_XENTR	Vacuolar-sorting protein SNF8	-	-	-	ko04144(Endocytosis)	248.383	201.616	183.214	157	159	246.351	314	338.059	331.385	172.722	206.485	232	169.007	154.47	188	273.325	171.429	227.561
Niben101Scf00157g02002	GO:0005488;	-	IPR016024;	sp|Q9T041|MAPT_ARATH	Microtubule-associated protein TORTIFOLIA1	-	-	GO:0005488//binding;	-	30.2417	23.5242	8.5412	12.6419	13	20.1958	17.5744	35	22.8637	27.0187	66.2799	48.8452	20.7852	20.6565	17	46	26.7268	32
Niben101Scf00157g02005	-	-	-	emb|CDY17280.1|	BnaA10g09140D [Brassica napus]	-	-	-	-	15	9.35333	8.38512	2.20933	6.23556	9.35333	11.6754	15	5	2.32407	1	5.4003	9.20513	6.64316	6.32097	2	0	0
Niben101Scf00157g02014	GO:0004672;GO:0004674;GO:0005524;GO:0006468;GO:0016772;	-	IPR011009;	sp|Q9LHP4|RCH2_ARATH	Receptor-like protein kinase 2	GO:0006468//protein phosphorylation;	-	GO:0004672//protein kinase activity;GO:0004674//protein serine/threonine kinase activity;GO:0005524//ATP binding;GO:0016772//transferase activity, transferring phosphorus-containing groups;	-	0	0	0	0	0	0	1.89805	0	0	2.12587	0	0	0	0	0	0	1.03926	0.898107
Niben101Scf00157g03004	-	-	IPR020683;	AT1G50900.1	Ankyrin repeat family protein LENGTH=175	-	-	-	-	286.551	569	233.846	137.821	377	474.941	123.913	166.804	210.97	167.321	237.1	329	323	432.277	363	281.896	200.467	264.777
Niben101Scf00157g03005	-	K07976	-	sp|P87027|SPG1_SCHPO	Septum-promoting GTP-binding protein 1	-	-	-	-	0	0	0	0	0	0	0	0	0	0	0	0	0	0	0	0	1.03926	0
Niben101Scf00157g04001	GO:0000162;GO:0004834;GO:0006568;	K01696	IPR023026;	sp|B7J4S9|TRPB_ACIF2	Tryptophan synthase beta chain	GO:0000162//tryptophan biosynthetic process;GO:0006568//tryptophan metabolic process;	-	GO:0004834//tryptophan synthase activity;	ko00400(Phenylalanine, tyrosine and tryptophan biosynthesis);ko00260(Glycine, serine and threonine metabolism)	330	408.263	259.789	228.714	394.007	333	294.433	264.542	330	225.519	215.218	261.806	485.334	489.491	378.103	286	272	274.24
Niben101Scf00157g04002	-	K13108	-	sp|Q8BIZ6|SNIP1_MOUSE	Smad nuclear-interacting protein 1	-	-	-	-	67.5229	67	54.0415	29.8138	49.7099	55.0807	73.7874	52.9883	70	46	45.3194	57	70.2039	66.4815	60.7374	57.9422	57	40.3915
Niben101Scf00157g05005	GO:0005097;GO:0032313;	-	IPR000195;	ref|XP_002869579.1|	rab GTPase activator [Arabidopsis lyrata subsp. lyrata] gb|EFH45838.1| rab GTPase activator [Arabidopsis lyrata subsp. lyrata]	-	-	-	-	38.6186	141	72	115.041	79	47.5226	175.92	59.7884	29.4979	22	17.007	16.6495	16	12.4711	20.497	20.9886	16.6281	23.903
Niben101Scf00157g05006	-	-	-	emb|CDY24256.1|	BnaC03g42290D [Brassica napus]	-	-	-	-	0	0	0	0	0	2	6.23556	0	0	0	0	1.79621	0	0	1.16203	0	0	1.02279
Niben101Scf00157g06004	-	K19025	IPR011989;IPR028222;	tpg|DAA35905.1|	TPA: hypothetical protein ZEAMMB73_888269 [Zea mays]	-	-	-	-	82.9195	76.2219	49.8844	31.1778	27.8413	65	54	124.338	114	31.3217	47.0485	34.1648	99.0285	94	104.168	36.0739	33	29.0993
Niben101Scf00157g06005	-	K19025	IPR028222;	tpg|DAA35905.1|	TPA: hypothetical protein ZEAMMB73_888269 [Zea mays]	-	-	-	-	61.5878	38	30.2417	15.3419	14.2353	49.5143	30	37.2027	45.3236	15	19.7459	9.3168	41.9773	30.1385	38.4526	17.064	9	14
Niben101Scf00157g07004	-	-	-	-	Unknown protein	-	-	-	-	52.0838	36.9988	22	49.8844	55.9008	43.0819	82.1015	46.7667	23.3508	35	19	48.8055	31	37.8021	42.9573	28.4707	25.2839	12
Niben101Scf00157g07009	-	-	IPR019153;	sp|Q94C53|DDRGK_ARATH	DDRGK domain-containing protein 1	-	-	-	-	53.0022	35.9243	19	9	33.699	50	162.009	42.9573	48.4002	7.37446	15	10.6294	98.0469	109	135.104	21.4286	17.6746	11.4319
Niben101Scf00158g00001	-	-	-	emb|CDY56587.1|	BnaC07g48120D [Brassica napus]	-	-	-	-	189.217	152.793	104.296	202	164.755	144.295	163	205.773	186.336	187.793	251.501	142.379	174.233	227	250	290.509	232	239.773
Niben101Scf00158g02004	-	-	-	-	Unknown protein	-	-	-	-	0	7.45344	1.10467	2.07852	14.5496	12.5735	0	1	2.32407	12	18.361	6.13676	3.79609	0	1	10.6294	4.62485	3
Niben101Scf00158g03003	GO:0006508;GO:0008236;	-	IPR008758;	AT4G36195.1	Serine carboxypeptidase S28 family protein LENGTH=488	GO:0006508//proteolysis;	-	GO:0008236//serine-type peptidase activity;	-	136	98.7729	83	60.4833	84.8918	121.475	159.078	132	119.049	22.1993	31	41.5704	77.3294	127.036	112.24	37.4133	42.211	19
Niben101Scf00158g03006	-	-	-	-	Unknown protein	-	-	-	-	1	1.06294	0	1	3.11778	0	1.10467	0	1.03926	1.79621	1	0	0	1	1.08006	1.02279	0	1.05349
Niben101Scf00158g04001	GO:0005515;GO:0008270;	-	IPR003169;IPR013083;	sp|Q9SD34|C3H44_ARATH	Zinc finger CCCH domain-containing protein 44	-	-	GO:0005515//protein binding;GO:0008270//zinc ion binding;	-	559.121	651.616	343.077	336	420	603.096	608	700.959	424.459	191.703	255.999	219	380.531	229.393	322	313.856	247.827	304.888
Niben101Scf00158g04002	GO:0005515;GO:0008270;	-	IPR013083;	sp|Q9SD34|C3H44_ARATH	Zinc finger CCCH domain-containing protein 44	-	-	GO:0005515//protein binding;GO:0008270//zinc ion binding;	-	0	0	0	0	0	0	0	0	0	0	0	0	0	0	1	1	0	0
Niben101Scf00158g04018	GO:0005506;GO:0016705;GO:0020037;GO:0055114;	K09755	IPR001128;	AT5G04330.1	Cytochrome P450 superfamily protein LENGTH=512	GO:0055114//obsolete oxidation-reduction process;	-	GO:0005506//iron ion binding;GO:0016705//oxidoreductase activity, acting on paired donors, with incorporation or reduction of molecular oxygen;GO:0020037//heme binding;	ko00940(Phenylpropanoid biosynthesis)	299	1072.52	351.243	191.107	316.974	187.067	92.505	785	194	138.282	82	52.9229	22.5014	27.5217	33.7118	57	55.2726	65.6729
Niben101Scf00158g04026	-	-	IPR007941;	sp|Q5TGY1|TMCO4_HUMAN	Transmembrane and coiled-coil domain-containing protein 4	-	-	-	-	749	680	660.036	259	373.701	430.596	641.539	916.54	884	83.9719	68.4478	88	669.283	502.175	676.055	189.145	162.124	141.003
Niben101Scf00158g06008	-	-	IPR007818;	sp|Q9SD40|SRS1_ARATH	Protein SHI RELATED SEQUENCE 1	-	-	-	-	5.26747	10	4.25174	0.924971	4	4.15704	4.6584	5.52333	6.23556	1.03926	0.898107	1	3	6.97221	2	1.08006	1.02279	0
Niben101Scf00159g00005	GO:0005215;GO:0016020;GO:0016021;GO:0022857;GO:0022891;GO:0055085;	-	IPR005828;IPR020846;	sp|Q46909|YGCS_ECOLI	Inner membrane metabolite transport protein YgcS	GO:0055085//transmembrane transport;	GO:0016020//membrane;GO:0016021//integral component of membrane;	GO:0005215//transporter activity;GO:0022857//transmembrane transporter activity;	-	830.708	667.204	469.745	386.186	451	610	729.758	753	866.208	561.513	891.132	528.854	466	488.95	442.136	589	595.496	438.821
Niben101Scf00159g01002	GO:0005215;GO:0006810;GO:0016020;GO:0055085;	K14611	IPR006043;	sp|Q9SHZ3|NAT1_ARATH	Nucleobase-ascorbate transporter 1	GO:0006810//transport;GO:0055085//transmembrane transport;	GO:0016020//membrane;	GO:0005215//transporter activity;	-	25	27.0015	5.11396	5.69414	9.48145	21	19.1328	18.4994	24	1.03926	1.86336	1.10467	36.3741	42.6096	33.23	0	1	2.32407
Niben101Scf00159g03004	-	-	-	emb|CDX79492.1|	BnaC03g18280D [Brassica napus]	-	-	-	-	93.422	163	93.5333	204.97	209.886	157.967	117.436	99.6899	72	389	572.883	202	82.0845	75.6866	89.2081	407.702	483	330.573
Niben101Scf00159g03005	-	K12160	IPR029071;	sp|Q9FLP6|SUMO2_ARATH	Small ubiquitin-related modifier 2	-	-	-	ko03013(Nucleocytoplasmic transport)	143.697	105	112	110.393	131	232.213	223.992	218.275	327.637	85	117.986	108.222	183	173.556	176.087	75.1172	37.4133	50.9237
Niben101Scf00159g05004	GO:0004553;GO:0005975;	-	IPR000490;IPR012946;IPR017853;	sp|Q9ZU91|E133_ARATH	Glucan endo-1,3-beta-glucosidase 3	GO:0005975//carbohydrate metabolic process;	-	GO:0004553//hydrolase activity, hydrolyzing O-glycosyl compounds;	-	37.0119	49.5143	18	37.2027	81.3974	112	5.1963	26.087	58.5472	178.753	270.207	436.48	111	69	84.8285	108	117.727	107.393
Niben101Scf00159g06003	-	-	IPR005018;IPR006593;	sp|Q9SJ74|B561G_ARATH	Cytochrome b561 and DOMON domain-containing protein	-	-	-	-	33.5405	22.0933	10.3926	10.3926	14.3697	10	15	16.2685	21	1.08006	1.02279	0	9.48145	13	17.007	0.924971	0	2.07852
Niben101Scf00159g07003	-	-	IPR000008;	AT5G55530.1	Calcium-dependent lipid-binding (CaLB domain) family protein LENGTH=405	-	-	-	-	310.263	251	165.249	405.026	598.833	705.841	166	299.748	160.02	269	228.637	367.082	206.572	115.358	161.085	144.595	117	127
Niben101Scf00159g07004	GO:0000166;GO:0003676;	K14411	IPR012677;	AT1G58470.1	RNA-binding protein 1 LENGTH=360	-	-	GO:0000166//nucleotide binding;GO:0003676//nucleic acid binding;	ko03015(mRNA surveillance pathway)	203.021	154.47	236	287.875	210.56	226.456	244.226	192.263	178.723	208	250	296.319	198	235.453	208.65	267.624	283.39	265
Niben101Scf00159g08005	-	-	IPR011333;IPR027356;	sp|Q9LUB9|Y5813_ARATH	BTB/POZ domain-containing protein	-	-	-	-	1.03926	0	0	2	0	0	0	0	0	10.5349	7	36.1398	0	1	1.03926	5.59008	4.41866	14.5496
Niben101Scf00159g08007	-	K13118	IPR019148;	AT3G07790.1	DGCR14-related LENGTH=508	-	-	-	-	230.128	279.962	210.699	244	391.16	283.966	269	375.173	338.2	196.63	195.381	297.228	267.636	295	269	273.078	240	231.133
Niben101Scf00159g08017	GO:0004798;GO:0005524;GO:0006233;	K00943	IPR018094;IPR027417;	sp|P0C8G1|KTHY_ASFP4	Thymidylate kinase	GO:0006233//dTDP biosynthetic process;	-	GO:0004798//thymidylate kinase activity;GO:0005524//ATP binding;	ko00240(Pyrimidine metabolism)	25.9815	63.3542	38.6633	31.1778	47.8059	30.5356	70	41	53.4536	65	101.526	106.37	10.4392	12.6419	11	190.265	115.621	160
Niben101Scf00159g08018	-	K14003	IPR015943;	sp|Q6GMD2|WDR61_XENLA	WD repeat-containing protein 61	-	-	-	ko04141(Protein processing in endoplasmic reticulum)	326	335.828	334	287.296	313.997	289.452	395.061	339	391.16	147.07	260	237.99	247.827	212.096	286.836	230.716	127.531	157
Niben101Scf00159g08019	GO:0003700;GO:0006355;GO:0043565;	K18834	IPR003657;	sp|Q9SI37|WRKY1_ARATH	WRKY transcription factor 1	GO:0006355//regulation of transcription, DNA-templated;	-	GO:0003700//DNA-binding transcription factor activity;GO:0043565//sequence-specific DNA binding;	ko04626(Plant-pathogen interaction)	529	440.055	610.481	351	466.627	435.094	1088.1	749.306	777.366	164.354	186	165	746.026	593	841.367	259.789	222.071	253.892
Niben101Scf00160g03004	-	-	-	-	Unknown protein	-	-	-	-	4.15704	7.27481	1.79621	34	37	18.5926	23	6.48036	3.06838	165.13	198.057	276	15.944	10.1747	16	176.674	128.572	174.537
Niben101Scf00160g06027	GO:0004672;GO:0004674;GO:0005515;GO:0005524;GO:0006468;GO:0016772;	K13420	IPR001611;IPR003591;IPR011009;IPR013320;	sp|Q9LHP4|RCH2_ARATH	Receptor-like protein kinase 2	GO:0006468//protein phosphorylation;	-	GO:0004672//protein kinase activity;GO:0004674//protein serine/threonine kinase activity;GO:0005515//protein binding;GO:0005524//ATP binding;GO:0016772//transferase activity, transferring phosphorus-containing groups;	ko04626(Plant-pathogen interaction);ko04016(MAPK signaling pathway - plant)	4365.6	3423.29	3733.45	1058.76	1700	1708.14	4378.81	6265	4484.4	218.945	279.48	216.166	1642.03	1557.32	1996	338	373.013	271
Niben101Scf00160g06029	GO:0004672;GO:0004674;GO:0005524;GO:0006468;GO:0016772;	-	IPR011009;	sp|P93194|RPK1_IPONI	Receptor-like protein kinase	GO:0006468//protein phosphorylation;	-	GO:0004672//protein kinase activity;GO:0004674//protein serine/threonine kinase activity;GO:0005524//ATP binding;GO:0016772//transferase activity, transferring phosphorus-containing groups;	-	85	74.8267	54.0374	48.6053	39.4919	61.3163	70.0523	52	101	23.2407	34	21.6012	40.9117	52.1962	68.4772	30	15.944	16.6495
Niben101Scf00160g06034	GO:0004672;GO:0004674;GO:0005524;GO:0006468;GO:0016772;	K13420	IPR011009;	sp|P93194|RPK1_IPONI	Receptor-like protein kinase	GO:0006468//protein phosphorylation;	-	GO:0004672//protein kinase activity;GO:0004674//protein serine/threonine kinase activity;GO:0005524//ATP binding;GO:0016772//transferase activity, transferring phosphorus-containing groups;	ko04626(Plant-pathogen interaction);ko04016(MAPK signaling pathway - plant)	111	108	153.389	21	54.003	55.2308	124.322	184.362	123	7.44055	11.0996	8	55.0807	39.1305	75.1172	20.7852	20.7852	16.1659
Niben101Scf00160g08001	-	-	-	sp|Q94G86|ALL9_OLEEU	Glucan endo-1,3-beta-D-glucosidase	-	-	-	-	3.16048	3	3.18881	1.84994	3	5.1963	4.6584	8.83732	14.5496	0	0	0	17	8.13424	12	6.48036	5.11396	5.69414
Niben101Scf00160g09012	GO:0003676;GO:0003677;GO:0046983;	-	IPR003656;IPR008906;IPR012337;IPR025525;	sp|O75132|ZBED4_HUMAN	Zinc finger BED domain-containing protein 4	-	-	GO:0003676//nucleic acid binding;GO:0003677//DNA binding;GO:0046983//protein dimerization activity;	-	433.029	401.154	327.367	233.508	320	310	342.8	371	420.143	452.074	362.527	503.57	312	313.566	283.041	702	633.948	626.089
Niben101Scf00160g09014	GO:0003824;GO:0008460;GO:0009225;GO:0050662;	K12450	IPR001509;IPR005888;IPR029903;	sp|A0R5C5|GALE_MYCS2	UDP-glucose 4-epimerase	GO:0009225//nucleotide-sugar metabolic process;	-	GO:0003824//catalytic activity;GO:0008460//dTDP-glucose 4,6-dehydratase activity;GO:0050662//obsolete coenzyme binding;	ko00520(Amino sugar and nucleotide sugar metabolism)	1166	1078.98	1055.52	837.987	1029.26	746	1153.28	851.898	1293	147.575	203.106	120.408	772.17	730.599	614.305	279	245	232.407
Niben101Scf00160g09015	-	-	-	ref|XP_002522268.1|	conserved hypothetical protein [Ricinus communis] gb|EEF40126.1| conserved hypothetical protein [Ricinus communis]	-	-	-	-	0	0	0	0	0	0	0	0.898107	0	1	0	0	0	0	0	1.05349	0	1.06294
Niben101Scf00160g09017	-	-	IPR025846;IPR026057;	sp|Q9ZV89|TBL42_ARATH	Protein trichome birefringence-like 42	-	-	-	-	0	0	0	0	0	0	0	0.949023	0	0	0	0.924971	0	0	0	0	0	1.03926
Niben101Scf00160g10001	GO:0003824;GO:0006541;GO:0008242;GO:0016787;	K01307	IPR011697;IPR029062;	sp|O65355|GGH2_ARATH	Gamma-glutamyl hydrolase 2	GO:0006541//glutamine metabolic process;	-	GO:0003824//catalytic activity;GO:0008242//omega peptidase activity;GO:0016787//hydrolase activity;	ko00790(Folate biosynthesis)	1027.79	863.866	884	593.118	582.732	874	1487.18	1106.84	1342.17	365.819	365.819	253.266	883	831	1322.4	599	667.477	445.938
Niben101Scf00160g10002	GO:0005634;GO:0006260;	K03504	IPR019038;	sp|Q9EQ28|DPOD3_MOUSE	DNA polymerase delta subunit 3	GO:0006260//DNA replication;	GO:0005634//nucleus;	-	ko03440(Homologous recombination);ko03430(Mismatch repair);ko03420(Nucleotide excision repair);ko03410(Base excision repair);ko03030(DNA replication)	170.497	323.667	233.833	224.48	198.482	251	255	226.597	195	394.222	569.695	515.319	143.275	166	166.881	557.757	618	657.851
Niben101Scf00160g10004	-	K03327	-	ref|XP_007021525.1|	MATE efflux family protein ALF5 [Theobroma cacao] gb|EOY13050.1| MATE efflux family protein ALF5 [Theobroma cacao]	-	-	-	-	1.16203	6	2.16012	3.06838	6.64316	9.48145	0	7.44055	4.62485	6	8.31407	10.2485	2.20933	5.1963	6.23556	5.38864	1	4
Niben101Scf00160g10022	GO:0006855;GO:0015238;GO:0015297;GO:0016020;GO:0055085;	K03327	IPR002528;	AT3G23550.1	MATE efflux family protein LENGTH=469	GO:0006855//xenobiotic transmembrane transport;GO:0055085//transmembrane transport;	GO:0016020//membrane;	GO:0015297//antiporter activity;	-	4.25174	5.54982	2	2.07852	7.45344	12.1513	2.07852	1.03926	3.59243	8	3	5.81017	0	1.08006	2.04559	3.79609	6.32097	5
Niben101Scf00160g10024	GO:0004378;GO:0009058;GO:0033164;	K03843	IPR001296;IPR027054;	sp|Q9H553|ALG2_HUMAN	Alpha-1,3/1,6-mannosyltransferase ALG2	GO:0009058//biosynthetic process;	-	GO:0004378//GDP-Man:Man1GlcNAc2-PP-Dol alpha-1,3-mannosyltransferase activity;GO:0033164//glycolipid 1,6-alpha-mannosyltransferase activity;	ko00513(Various types of N-glycan biosynthesis);ko00510(N-Glycan biosynthesis)	90.4156	72.7467	71	79	108.069	107	126.367	104.325	101.545	150.65	176	162.629	98.9719	84	87.2978	140.684	150.234	126.79
Niben101Scf00160g10028	GO:0015031;GO:0016020;	K10956	IPR002208;IPR023201;	sp|Q54XK2|SC61A_DICDI	Protein transport protein Sec61 subunit alpha	GO:0015031//protein transport;	GO:0016020//membrane;	-	ko04145(Phagosome);ko04141(Protein processing in endoplasmic reticulum);ko03060(Protein export)	4040.03	4973.83	5440.25	4204	5766.42	3695.26	5251	2933.83	2104.66	2000.55	2072.28	1555.77	1083.12	843	1036	2338.01	1834	1532.6
Niben101Scf00160g10030	-	-	-	gb|EMT14703.1|	Zinc finger protein VAR3, chloroplastic [Aegilops tauschii]	-	-	-	-	18.7067	15.8386	6.62799	8.31407	6.23556	14.3697	13	9	19.7546	0	1.08006	7.15955	16.1334	14.7489	7	5.31468	0.924971	3
Niben101Scf00161g00005	GO:0004739;GO:0006086;	K00162	IPR005475;IPR027110;IPR029061;	sp|Q1RJX3|ODPB_RICBR	Pyruvate dehydrogenase E1 component subunit beta	GO:0006086//acetyl-CoA biosynthetic process from pyruvate;	-	GO:0004739//pyruvate dehydrogenase (acetyl-transferring) activity;	ko00620(Pyruvate metabolism);ko00020(Citrate cycle (TCA cycle));ko00010(Glycolysis / Gluconeogenesis)	681	865.716	715	685.838	597.311	484.002	834.368	838	667.523	136.896	149	137.182	224.535	365.644	383.487	183.949	150.882	140
Niben101Scf00161g00006	GO:0003677;GO:0003899;GO:0006351;	K03046	IPR006592;	sp|A4QKS2|RPOC1_CRUWA	DNA-directed RNA polymerase subunit beta'	GO:0006351//transcription, DNA-templated;	-	GO:0003677//DNA binding;GO:0003899//DNA-directed 5'-3' RNA polymerase activity;	ko03020(RNA polymerase)	0	0	0	3	1.03926	0.93168	1.10467	1.03926	1.03926	0.898107	0	1	1.16203	0	1.08006	1.02279	0	0
Niben101Scf00161g00012	GO:0003824;GO:0004739;GO:0006086;GO:0008152;	K00162	IPR005476;IPR009014;IPR027110;	sp|P21882|ODPB_BACSU	Pyruvate dehydrogenase E1 component subunit beta	GO:0006086//acetyl-CoA biosynthetic process from pyruvate;GO:0008152//metabolic process;	-	GO:0003824//catalytic activity;GO:0004739//pyruvate dehydrogenase (acetyl-transferring) activity;	ko00620(Pyruvate metabolism);ko00020(Citrate cycle (TCA cycle));ko00010(Glycolysis / Gluconeogenesis)	379.33	506.119	405.944	409	345	393.93	494	522.749	313.997	75.9218	86.3866	72	225.342	140.596	195	113.279	94.0997	87.2685
Niben101Scf00161g01007	-	K01054	IPR022742;IPR029058;	AT1G73480.1	alpha/beta-Hydrolases superfamily protein LENGTH=463	-	-	-	ko00561(Glycerolipid metabolism)	93.9652	58.2992	28.4707	22.1234	21	80.7831	31.449	80	64.4341	13.9752	15.4653	19.7459	413.625	367.326	418	211	262.62	198
Niben101Scf00161g02006	-	-	IPR001763;	sp|B7UP69|YCEA_ECO27	UPF0176 protein YceA	-	-	-	-	77	174.596	54.0374	24.3026	58.1985	135.104	49.3959	120	105	20.9166	41	24.8414	124.781	131.914	175.934	23	25.5104	20.3494
Niben101Scf00161g03008	-	-	-	-	Unknown protein	-	-	-	-	1	0	1.16203	0	0	0	0.949023	0	0	0	0	0	0	0	0	0	0	0.898107
Niben101Scf00161g03014	-	K05527	IPR002634;	AT1G55805.1	BolA-like family protein LENGTH=160	-	-	-	-	209.645	196	162.629	120.246	228	233.833	186.336	227.561	239.03	68.5911	77.2372	111	172	201.032	162	131.767	68.5271	73.0747
Niben101Scf00161g03016	-	-	-	sp|P07954|FUMH_HUMAN	Fumarate hydratase, mitochondrial	-	-	-	-	39.7679	45.7274	37.4133	17.9621	9	43	82.5045	43	54.003	15.3419	22.7765	22.1234	86	73.3425	100.822	35	33.2563	20.497
Niben101Scf00161g04002	-	-	-	ref|XP_002525675.1|	conserved hypothetical protein [Ricinus communis] gb|EEF36658.1| conserved hypothetical protein [Ricinus communis]	-	-	-	-	8	1.08006	5.11396	0.949023	4.21398	3	10.6294	7.39977	6	5.1963	4.6584	1.10467	5.1963	6.23556	5.38864	5	9	3.4861
Niben101Scf00161g04007	-	-	IPR000270;	sp|Q0WLC7|Y5053_ARATH	CBS domain-containing protein CBSCBSPB4	-	-	-	-	147.07	196	257.736	327.02	325.876	279.561	719.167	67.358	66	550	1107.42	315	108.006	84.8918	98.6983	678.451	826	496.391
Niben101Scf00161g05002	-	K14190	IPR026506;	sp|Q8RWE8|GGAP1_ARATH	GDP-L-galactose phosphorylase 1	-	-	-	ko00053(Ascorbate and aldarate metabolism)	2845.2	2527	1728	2858.61	2608	4734.98	2785.06	2510.16	3586.1	2669	3388.64	2298.55	9378	8626.89	9237.6	3410.1	3324.59	2932.79
Niben101Scf00163g00004	GO:0017004;GO:0020037;	-	IPR002541;	sp|Q0G9R3|CCSA_DAUCA	Cytochrome c biogenesis protein CcsA	GO:0017004//cytochrome complex assembly;	-	GO:0020037//heme binding;	-	10.4392	1.05349	8	7.44055	7.39977	13	2.07852	7.45344	5.52333	6.23556	6.23556	6.28675	2	2	3.4861	7	5.4003	0
Niben101Scf00163g00005	GO:0000166;GO:0003676;	-	IPR012677;	sp|Q9C652|RBP1_ARATH	RNA-binding protein 1	-	-	GO:0000166//nucleotide binding;GO:0003676//nucleic acid binding;	-	464.908	684.892	467.667	825.172	907.986	784	722	880.822	607	454.705	436.732	435.601	417.184	340	486.824	664.129	666	630.83
Niben101Scf00163g00010	GO:0003824;GO:0050662;	-	IPR001509;IPR016040;	AT2G33590.1	NAD(P)-binding Rossmann-fold superfamily protein LENGTH=321	-	-	GO:0003824//catalytic activity;GO:0050662//obsolete coenzyme binding;	-	180.115	182	84.2447	104.325	195.499	234.929	25	41.4545	82.3224	86	85.2193	193.789	35.3493	27.0207	17.6674	27.8413	33	31
Niben101Scf00163g01009	GO:0004420;GO:0008299;GO:0015936;GO:0016021;GO:0016616;GO:0050661;GO:0050662;GO:0055114;	K00021	IPR002202;IPR023074;IPR023282;	sp|P29057|HMDH1_HEVBR	3-hydroxy-3-methylglutaryl-coenzyme A reductase 1	GO:0008299//isoprenoid biosynthetic process;GO:0015936//coenzyme A metabolic process;GO:0055114//obsolete oxidation-reduction process;	GO:0016021//integral component of membrane;	GO:0004420//hydroxymethylglutaryl-CoA reductase (NADPH) activity;GO:0016616//oxidoreductase activity, acting on the CH-OH group of donors, NAD or NADP as acceptor;GO:0050661//NADP binding;GO:0050662//obsolete coenzyme binding;	ko00900(Terpenoid backbone biosynthesis)	306.125	273.791	117	691.107	504.039	680.474	299.307	378.29	407.741	449	369	438.087	558	546.51	544.126	556.127	628.936	490
Niben101Scf00163g01011	GO:0003854;GO:0006694;GO:0016616;GO:0055114;	-	IPR016040;	sp|P51110|DFRA_VITVI	Dihydroflavonol-4-reductase	GO:0006694//steroid biosynthetic process;GO:0055114//obsolete oxidation-reduction process;	-	GO:0003854//3-beta-hydroxy-delta5-steroid dehydrogenase activity;GO:0016616//oxidoreductase activity, acting on the CH-OH group of donors, NAD or NADP as acceptor;	-	38.4526	39.5167	18	38	38.3471	40	35.642	35.7977	56.9414	23.1769	24	24.4475	59.1981	65	74.8267	27.9504	26.512	21.8244
Niben101Scf00163g03001	-	-	-	AT2G33585.1	unknown protein; Has 31 Blast hits to 31 proteins in 12 species: Archae - 0; Bacteria - 0; Metazoa - 0; Fungi - 0; Plants - 31; Viruses - 0; Other Eukaryotes - 0 (source: NCBI BLink). LENGTH=193	-	-	-	-	165.692	142.353	190.683	217	199.832	186.844	185	165.242	145.342	128.141	155.889	199.538	77.2372	109	109	210.328	136	128.527
Niben101Scf00163g03007	-	-	IPR005175;	AT1G76500.1	Predicted AT-hook DNA-binding family protein LENGTH=302	-	-	-	-	310.739	361.492	171.223	1070.44	982.1	653.822	81	795	630.985	76	38.8822	121.712	75.9218	134.847	125	52.0838	39.7737	47
Niben101Scf00163g03008	-	-	IPR001606;	AT1G76510.3	ARID/BRIGHT DNA-binding domain-containing protein LENGTH=493	-	-	-	-	226	264.944	212	176.05	201.49	200.244	323.423	248	311.44	130.421	153	234.873	304.659	328.086	306.581	274.364	204.768	229
Niben101Scf00163g04004	GO:0016021;GO:0055085;	-	IPR004776;	AT1G20925.1	Auxin efflux carrier family protein LENGTH=472	GO:0055085//transmembrane transport;	GO:0016021//integral component of membrane;	-	-	101	107.356	73.9977	185	130.947	158.386	143.606	87.2978	29.0993	112.263	158	154	38.3471	49	54.003	107.393	103.443	94.8145
Niben101Scf00163g04005	GO:0004672;GO:0005524;GO:0006468;GO:0016772;	K07760	IPR011009;	AT1G20930.1	cyclin-dependent kinase B2;2 LENGTH=315	GO:0006468//protein phosphorylation;	-	GO:0004672//protein kinase activity;GO:0005524//ATP binding;GO:0016772//transferase activity, transferring phosphorus-containing groups;	-	3.11778	0	0	0	0	1.16203	1	2.16012	0	0	3.16048	3	3.18881	0	3	1.03926	3.72672	5.52333
Niben101Scf00163g06002	-	-	IPR007527;IPR018289;	sp|Q9SZL8|FRS5_ARATH	Protein FAR1-RELATED SEQUENCE 5	-	-	-	-	0	1.02279	0	7.37446	3	2.12587	0	0	0	0	2.20933	0	0	0	0	0	0	0
Niben101Scf00163g06003	-	-	IPR004330;	sp|Q9SZL8|FRS5_ARATH	Protein FAR1-RELATED SEQUENCE 5	-	-	-	-	0	0	0	2.20933	2.07852	0	0	0	0	0	0	0	0	0	0	0	1.06294	0
Niben101Scf00163g06010	-	-	IPR004330;IPR007527;	sp|Q9SZL7|FRS9_ARATH	Protein FAR1-RELATED SEQUENCE 9	-	-	-	-	88	68	59.2638	54	60.4833	93.0741	81.6159	107.456	66	11.6923	19.4244	18	28.06	34.4722	61.8612	33.2563	21.8244	18.8602
Niben101Scf00163g07002	-	K03363	IPR015943;	sp|Q5R6T6|WDR91_PONAB	WD repeat-containing protein 91	-	-	-	ko04120(Ubiquitin mediated proteolysis)	0	1	0	0	0	0	0	0	0	0	0	0	0	0	0	1.08006	0	0
Niben101Scf00163g07004	-	-	IPR002885;IPR011990;	sp|Q9LSL9|PP445_ARATH	Pentatricopeptide repeat-containing protein	-	-	-	-	0	0	0	0.898107	0	0	0	1	1.08006	0	0.949023	0	0	1.06294	0	0	0	0
Niben101Scf00163g07005	GO:0005525;GO:0006886;GO:0009707;GO:0015450;	-	IPR005688;IPR027417;	sp|B2JIU7|DER_BURP8	GTPase Der	GO:0006886//intracellular protein transport;	GO:0009707//chloroplast outer membrane;	GO:0005525//GTP binding;GO:0015450//protein-transporting ATPase activity;	-	587	831.646	504.237	708.92	1021.89	793	527.216	455.086	520	690.068	668.946	1314.55	515.473	458.313	476.895	611	594	647.253
Niben101Scf00163g07017	-	-	-	-	Unknown protein	-	-	-	-	172.97	173	180.831	148.137	235.294	199.538	268.129	143.697	152	72	231.245	150	70.2039	111.484	148.048	144.329	106	96.7271
Niben101Scf00163g08007	-	K02134	-	sp|Q40089|ATP4_IPOBA	ATP synthase subunit delta', mitochondrial	-	-	-	ko00190(Oxidative phosphorylation)	16.1659	13	7	5.81017	5	6.48036	9.20513	4.74511	12.6419	8	9.56642	5.54982	17	12.4711	12.1118	27.6166	16.6281	28.06
Niben101Scf00163g08008	GO:0015986;GO:0045261;GO:0046933;GO:0046961;	K02134	IPR001469;	sp|B2KEX4|ATPE_ELUMP	ATP synthase epsilon chain	GO:0015986//ATP synthesis coupled proton transport;	GO:0045261//proton-transporting ATP synthase complex, catalytic core F(1);	GO:0046933//proton-transporting ATP synthase activity, rotational mechanism;GO:0046961//proton-transporting ATPase activity, rotational mechanism;	ko00190(Oxidative phosphorylation)	37.0119	33.7118	26	20.1958	22.1993	43	75.8659	44.7206	39.7679	25.9815	17.6674	21.5546	41	33	51.1295	35	46.4426	37.8433
Niben101Scf00163g08018	GO:0004784;GO:0006801;GO:0046872;GO:0055114;	K04564	IPR001189;	AT5G51100.1	Fe superoxide dismutase 2 LENGTH=305	GO:0006801//superoxide metabolic process;GO:0055114//obsolete oxidation-reduction process;	-	GO:0004784//superoxide dismutase activity;GO:0046872//metal ion binding;	ko04146(Peroxisome)	137.889	206.572	91.4548	89.3763	127.531	134	109	101.097	117	54.003	80.8006	75.9218	40.0328	71	57.3985	71.2227	69	90.4156
Niben101Scf00163g08019	GO:0006729;GO:0008124;	-	IPR001533;	sp|Q885L1|PHS_PSESM	Pterin-4-alpha-carbinolamine dehydratase	GO:0006729//tetrahydrobiopterin biosynthetic process;	-	GO:0008124//4-alpha-hydroxytetrahydrobiopterin dehydratase activity;	-	357.907	494	165.249	56.2536	163.232	475.126	134	324.195	334.839	43	58.1985	27.0187	521.402	532.101	686.95	29.6375	26	22
Niben101Scf00163g09011	-	-	IPR005069;	AT1G28710.1	Nucleotide-diphospho-sugar transferase family protein LENGTH=340	-	-	-	-	455.999	381.088	644	812.701	751.866	529.135	1386.37	609.006	153.576	428	339	386.958	63	66.9637	68.5271	243.899	230.715	204
Niben101Scf00163g10009	-	-	IPR005069;	AT1G28710.1	Nucleotide-diphospho-sugar transferase family protein LENGTH=340	-	-	-	-	0	0	0	0	0	0	0	0	0	2.10699	1	0	0.924971	0	0	6.52176	4.41866	5.1963
Niben101Scf00163g11001	GO:0000166;GO:0003676;	K14396	IPR012677;	sp|Q9FJN9|PABN2_ARATH	Polyadenylate-binding protein 2	-	-	GO:0000166//nucleotide binding;GO:0003676//nucleic acid binding;	ko03015(mRNA surveillance pathway)	504.237	482.103	453.003	430	518.712	565.157	535	639.144	559.94	679.369	754.502	585.103	495.755	502	573	723.948	498	531.389
Niben101Scf00163g12011	GO:0001104;GO:0006355;GO:0016592;	K15153	IPR008831;	sp|Q8VYB1|MED31_ARATH	Mediator of RNA polymerase II transcription subunit 31	GO:0006355//regulation of transcription, DNA-templated;	GO:0016592//mediator complex;	-	-	46.7667	30.7454	29.826	28.06	56.12	53.8864	55	46	52.2916	91	125.287	126.826	31.3177	43.1933	37	99.9159	103.597	103
Niben101Scf00163g12012	-	-	IPR022796;IPR023329;	gb|ABD64919.1|	Lil3 protein, putative [Brassica oleracea]	-	-	-	-	0	1.16203	0	0	0	0	0	0	3.18881	0	2	0	0	0	0	0	0	0
Niben101Scf00163g13001	-	-	-	AT5G51150.1	Mitochondrial import inner membrane translocase subunit Tim17/Tim22/Tim23 family protein LENGTH=531	-	-	-	-	99	109.482	50.8734	127	146.536	150.932	107.153	112.24	145.496	186.806	245	215	155.713	123	125.287	208.65	165.13	186.469
Niben101Scf00163g13002	GO:0031072;GO:0051082;	-	IPR001305;	AT5G06130.2	chaperone protein dnaJ-related LENGTH=315	-	-	GO:0031072//heat shock protein binding;GO:0051082//unfolded protein binding;	-	1082.91	929.098	602.63	464	702	1086.5	1079	1232.35	1161.89	88.2591	122.205	80	1057.62	1356.93	1717	186.027	147.205	157.967
Niben101Scf00163g15001	GO:0005515;GO:0005634;GO:0008270;GO:0016571;GO:0018024;GO:0034968;GO:0042393;	K11420	IPR001214;IPR003105;IPR003616;IPR007728;IPR015947;IPR025794;	sp|P42124|EZ_DROME	Histone-lysine N-methyltransferase E(z)	GO:0016571//histone methylation;GO:0034968//histone lysine methylation;	GO:0005634//nucleus;	GO:0005515//protein binding;GO:0008270//zinc ion binding;GO:0018024//histone-lysine N-methyltransferase activity;GO:0042393//histone binding;	ko00310(Lysine degradation)	0	1.02279	17.0824	12.6419	2	1.06294	12.0246	2	3.11778	180.746	157.967	262.933	4.15704	4.49053	4	170	145.254	162
Niben101Scf00163g15003	GO:0000079;GO:0019901;	-	IPR013763;IPR013922;	sp|O80513|CCU41_ARATH	Cyclin-U4-1	GO:0000079//regulation of cyclin-dependent protein serine/threonine kinase activity;	-	GO:0019901//protein kinase binding;	-	73	74.8267	50.3107	141.397	120.554	111.201	61.9694	35	51	12.7824	27	12.9607	63.4131	74.9728	84.2796	35	37.2027	27.7491
Niben101Scf00163g15011	-	-	-	-	Unknown protein	-	-	-	-	47	80	32.537	37	49.6827	62.3903	33.2158	72.6911	92	2.12587	0.924971	2	10.3926	15.8386	12.1513	0	0	0
Niben101Scf00163g17004	GO:0005515;GO:0005634;GO:0008270;GO:0018024;GO:0034968;GO:0042393;	K11420	IPR001214;IPR003105;IPR003616;IPR007728;IPR015947;	sp|P55200|KMT2A_MOUSE	Histone-lysine N-methyltransferase 2A	GO:0034968//histone lysine methylation;	GO:0005634//nucleus;	GO:0005515//protein binding;GO:0008270//zinc ion binding;GO:0018024//histone-lysine N-methyltransferase activity;GO:0042393//histone binding;	ko00310(Lysine degradation)	0	1	1.06294	0	1	0	2.79504	1.10467	1.03926	12.4711	24.2489	21	0	1.16203	0	14.0408	11.2507	18.0314
Niben101Scf00163g17005	GO:0006979;GO:0008113;GO:0016671;GO:0030091;GO:0055114;	K07304	IPR002569;IPR028427;	sp|B6IS04|MSRA_RHOCS	Peptide methionine sulfoxide reductase MsrA	GO:0006979//response to oxidative stress;GO:0030091//protein repair;GO:0055114//obsolete oxidation-reduction process;	-	GO:0008113//peptide-methionine (S)-S-oxide reductase activity;GO:0016671//oxidoreductase activity, acting on a sulfur group of donors, disulfide as acceptor;	-	2190.55	1790.64	1768.82	3267.31	3629	3218	2463.51	1940	1867.42	8552.59	8205.25	7575.68	1422	1863.33	1917.46	7173	6714.65	5728.9
Niben101Scf00163g17006	GO:0005634;	K12877	IPR004023;	sp|O65806|MGN_EUPLA	Protein mago nashi homolog	-	GO:0005634//nucleus;	-	ko03040(Spliceosome);ko03015(mRNA surveillance pathway);ko03013(Nucleocytoplasmic transport)	401	428.784	426.504	522.911	545.71	490	577.174	437.511	496	659.93	814.288	892.569	483.256	351.27	396.963	865	846	876.174
Niben101Scf00163g18004	GO:0005506;GO:0016491;GO:0016706;GO:0055114;	-	IPR002283;IPR026992;IPR027443;	sp|Q84MB3|ACCH1_ARATH	1-aminocyclopropane-1-carboxylate oxidase homolog 1	GO:0055114//obsolete oxidation-reduction process;	-	GO:0005506//iron ion binding;GO:0016491//oxidoreductase activity;GO:0016706//2-oxoglutarate-dependent dioxygenase activity;	-	0	1	0	0	0	0	0	0	0	0	1.16203	0	0	0	0.949023	0	0	0
Niben101Scf00163g19001	-	K01025	IPR000863;IPR027417;	sp|Q9FX56|SOT8_ARATH	Cytosolic sulfotransferase 8	-	-	-	-	105.079	137	117	1370.04	1793	671.797	233.197	52.1962	26.3374	8844	12039.9	5683.02	98	147.575	148.137	3826.56	3244.57	3203
Niben101Scf00163g19008	-	-	IPR002885;	sp|Q4V389|PPR55_ARATH	Pentatricopeptide repeat-containing protein	-	-	-	-	16.1334	18.9629	16	17.007	12.0246	11	21.8244	13.9752	18.7793	8.31407	8.31407	19.7584	6	6	5.81017	7	11.8807	17.3875
Niben101Scf00163g19009	-	-	IPR019378;	AT2G44500.1	O-fucosyltransferase family protein LENGTH=573	-	-	-	-	0	0	0	4.15704	0.898107	6	0	0	0	165.249	65.4587	43.655	3.16048	0	1.06294	100.822	109	119.515
Niben101Scf00163g20001	GO:0009523;GO:0009539;GO:0015979;GO:0042549;	-	IPR002644;	sp|Q332Y1|PSBZ_LACSA	Photosystem II reaction center protein Z	GO:0015979//photosynthesis;GO:0042549//photosystem II stabilization;	GO:0009523//photosystem II;GO:0009539//photosystem II reaction center;	-	-	4.64814	4	4.32024	6.13676	7.59218	4.21398	2	5.31468	7.39977	0	1.03926	0	6.62799	7.27481	7.27481	0	0	0
Niben101Scf00163g22002	GO:0003677;GO:0003700;GO:0006355;	K09286	IPR016177;	sp|Q9LW48|ERF5_NICSY	Ethylene-responsive transcription factor 5	GO:0006355//regulation of transcription, DNA-templated;	-	GO:0003677//DNA binding;GO:0003700//DNA-binding transcription factor activity;	-	144.559	61.973	38	151.732	471.43	526.925	87.2978	177.713	217.342	322	227	346.286	224	413.663	532.875	112.934	67.4237	86
Niben101Scf00163g22003	GO:0003677;GO:0003700;GO:0006355;	K09286	IPR016177;	sp|Q40478|ERF5_TOBAC	Ethylene-responsive transcription factor 5	GO:0006355//regulation of transcription, DNA-templated;	-	GO:0003677//DNA binding;GO:0003700//DNA-binding transcription factor activity;	-	17.6674	21.5546	18	29	76.6943	34	36.722	16.3647	5.69414	4.21398	7	3.18881	12.0246	35	58.1985	3.72672	0	2.07852
Niben101Scf00163g22004	GO:0003677;GO:0003700;GO:0006355;	K09286	IPR016177;	sp|Q40478|ERF5_TOBAC	Ethylene-responsive transcription factor 5	GO:0006355//regulation of transcription, DNA-templated;	-	GO:0003677//DNA binding;GO:0003700//DNA-binding transcription factor activity;	-	161.601	152.793	251.785	207	409.23	295.066	172	354.387	309.318	308.202	302.424	296.189	119.448	247	334	234.731	247	221.412
[truncated: 46,656 more rows]

## Sheet: Table S2
Table S2. Gene Onotology enrichment results of DEGs.
ID	Description	GeneRatio	BgRatio	pvalue	p.adjust	qvalue	geneID	Count	Fold Enrichment	Group	GO	is.significant	WUS48_1.read.count
[truncated: 92 more rows]

## Sheet: Table S3
Table S3.The metabolomics matrix for detected samples.
[truncated: 44,353 more rows]
[truncated: 10 more columns]

## Sheet: Table S4
Table S4. DEM annotation for differential expressed ions.
[truncated: 241 more rows]

## Sheet: Table S5
Table S5. KEGG pathway enrichment for DEGs.
[truncated: 92 more rows]

[truncated: 2 more sheets: Table S6, Table S7]
